# Supplementary material for: Transcriptome analysis reveals unique metabolic features in the Cryptosporidium parvum Oocysts associated with environmental survival and stresses
Source: PubMed Central journal article supplement (PMC3542205; doi:10.1186/1471-2164-13-647), 2012-11-21

**Figure S1.**

Morphology of *Cryptosporidium parvum* oocysts before (A) and after (B) equilibrated to room temperature overnight (RT O/N). Oocysts were stored at 4 C prior to equilibration at room temperature overnight before UV-irradiation and RNA extraction to minimize the effect of temperature variations on gene expressions.

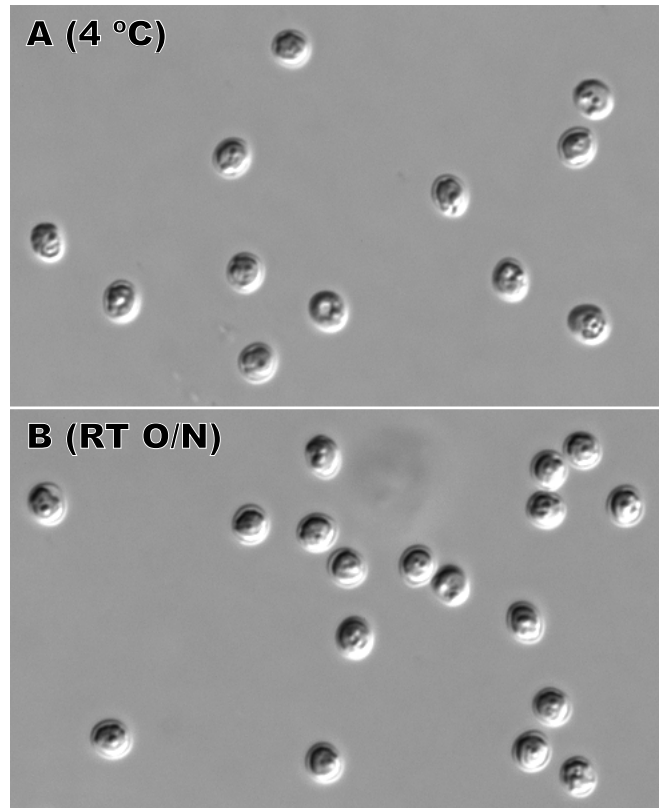

Supplement: 1471-2164-13-647-S1.pdf [file 1471-2164-13-647-S1.pdf]
