# Supplementary material for: Transcriptome analysis reveals unique metabolic features in the Cryptosporidium parvum Oocysts associated with environmental survival and stresses
Source: PubMed Central journal article supplement (PMC3542205; doi:10.1186/1471-2164-13-647), 2012-11-21
Supplement: 1471-2164-13-647-S2.pdf [file 1471-2164-13-647-S2.pdf]

**Table S1.** Complete list of Groups I and II genes classified under major functional categories. Their expression levels are indicated by quartiles, i.e., L0 = lowly or unexpressed Group II genes, L1 to L4 = Group I genes with expression levels in the parasite oocysts at bottom to top quartiles. Genes with expression at L0 and L4 levels are highlighted by green and pink colors for easy identification.

| Major Group             | Subgroup                                                | GeneID                                                                               | Description                                                                                          | L0                                 | L1       | L2       | L3       | L4       | Total     | Signal Mean   |        |       |
|-------------------------|---------------------------------------------------------|--------------------------------------------------------------------------------------|------------------------------------------------------------------------------------------------------|------------------------------------|----------|----------|----------|----------|-----------|---------------|--------|-------|
| Cell cycle              | CDC related                                             | cgd1_2180                                                                            | CDC48 like AAA ATPase                                                                                |                                    |          | 1        |          |          | 1         | 4.136         |        |       |
|                         |                                                         | cgd2_1540                                                                            | cell growth-regulating nucleolar protein, metal binding domain at N-terminus                         |                                    |          |          | 1        |          | 1         | 12.836        |        |       |
|                         |                                                         | cgd5_2510                                                                            | Cdc2-like CDK2/CDC28 like protein kinase                                                             | 1                                  |          |          |          |          | 1         | 0.598         |        |       |
|                         |                                                         | cgd6_1420                                                                            | cdc2-related protein kinase, putative                                                                |                                    |          | 1        |          |          | 1         | 2.612         |        |       |
|                         |                                                         | cgd6_1830                                                                            | HT-1080/Cdc123p - like protein                                                                       |                                    |          | 1        |          |          | 1         | 3.440         |        |       |
|                         |                                                         | cgd6_2060                                                                            | cdc39p protein-like; C-terminal Not1, CCR4-Not complex component; Not1                               |                                    |          |          |          | 1        | 1         | 41.270        |        |       |
|                         |                                                         | cgd7_1930                                                                            | CDC68 like aminopeptidase family chromatinic protein (possible inactive enzyme)                      | 1                                  |          |          |          |          | 1         | 0.382         |        |       |
|                         |                                                         | cgd7_280                                                                             | cell division control protein 28, putative                                                           |                                    | 1        |          |          |          | 1         | 1.657         |        |       |
|                         |                                                         | cgd7_4470                                                                            | CDC14 phosphatase                                                                                    |                                    |          |          | 1        |          | 1         | 21.845        |        |       |
|                         |                                                         | cgd8_2380                                                                            | CDC45 like protein, possible horizontal transfer                                                     | 1                                  |          |          |          |          | 1         | 0.389         |        |       |
|                         |                                                         | cgd8_4460                                                                            | cell differentiation protein rcd1, putative                                                          |                                    |          | 1        |          |          | 1         | 2.494         |        |       |
|                         |                                                         | CDC related Total                                                                    |                                                                                                      |                                    |          | 3        | 1        | 4        | 2         | 1             | 11     | 8.333 |
|                         |                                                         | Cyclin related                                                                       | cgd1_2320                                                                                            | cyclin B, saccharomyces Clb4p like |          |          |          | 1        |           |               | 1      | 7.617 |
|                         |                                                         |                                                                                      | cgd1_3150                                                                                            | cyclin'cyclin'                     | 1        |          |          |          |           | 1             | 0.397  |       |
|                         | cgd1_3310                                               |                                                                                      | cyclin domain protein, possible cyclin H                                                             | 1                                  |          |          |          |          | 1         | 0.311         |        |       |
|                         | cgd1_60                                                 |                                                                                      | cyclin dependent kinase A, putative                                                                  | 1                                  |          |          |          |          | 1         | 0.359         |        |       |
|                         | cgd2_2290                                               |                                                                                      | cyclin 6 pci7                                                                                        |                                    |          | 1        |          |          | 1         | 3.743         |        |       |
|                         | cgd3_4050                                               |                                                                                      | cyclin                                                                                               | 1                                  |          |          |          |          | 1         | 0.393         |        |       |
|                         | cgd5_3540                                               |                                                                                      | cyclin domain protein                                                                                |                                    |          |          |          | 1        | 1         | 66.359        |        |       |
|                         | cgd6_1840                                               |                                                                                      | cyclin M2-like membrane-associated protein with 4 transmembrane domains and 2 CBS domains            | 1                                  |          |          |          |          | 1         | 0.568         |        |       |
|                         | cgd7_1200                                               |                                                                                      | cyclin                                                                                               |                                    | 1        |          |          |          | 1         | 1.367         |        |       |
|                         | cgd7_2490                                               |                                                                                      | cyclin'cyclin'                                                                                       | 1                                  |          |          |          |          | 1         | 0.517         |        |       |
|                         | cgd7_3780                                               |                                                                                      | cyclin                                                                                               |                                    |          |          |          | 1        | 1         | 318.539       |        |       |
|                         | cgd7_430                                                |                                                                                      | cyclin-dependent kinase-related kinase, putative                                                     |                                    |          |          | 1        |          | 1         | 8.899         |        |       |
|                         | cgd7_520                                                |                                                                                      | cyclin'cyclophilin like peptidyl-prolyl cis-trans isomerase fused to WD40 repeats at the N-terminus' | 1                                  |          |          |          |          | 1         | 0.521         |        |       |
|                         | cgd7_660                                                |                                                                                      | cyclin; possible cyclin A                                                                            | 1                                  |          |          |          |          | 1         | 0.366         |        |       |
| cgd8_2510               | Cyclin dependent kinase regulatory subunit, putative    |                                                                                      |                                                                                                      | 1                                  |          |          | 1        | 5.273    |           |               |        |       |
| Cyclin related Total    |                                                         |                                                                                      |                                                                                                      | 8                                  | 1        | 2        | 2        | 2        | 15        | 27.682        |        |       |
| <b>Cell cycle Total</b> |                                                         |                                                                                      |                                                                                                      | <b>11</b>                          | <b>2</b> | <b>6</b> | <b>4</b> | <b>3</b> | <b>26</b> | <b>19.496</b> |        |       |
| Chaperone               | DNAj                                                    | cgd1_2280                                                                            | DNAJ                                                                                                 | 1                                  |          |          |          |          | 1         | 0.442         |        |       |
|                         |                                                         | cgd1_2970                                                                            | DNAJ like chaperone, 4 or more transmembrane domains                                                 |                                    |          | 1        |          |          | 1         | 4.067         |        |       |
|                         |                                                         | cgd2_1330                                                                            | DNAJ protein                                                                                         |                                    |          |          |          | 1        | 1         | 26.709        |        |       |
|                         |                                                         | cgd2_2260                                                                            | zuotin related factor-1 like protein with a DNAJ domain at the N-terminus and 2 SANT domains         |                                    |          |          | 1        |          | 1         | 21.815        |        |       |
|                         |                                                         | cgd2_3230                                                                            | heat shock protein DnaJ Pfj2, putative                                                               |                                    |          | 1        |          |          | 1         | 3.822         |        |       |
|                         |                                                         | cgd3_930                                                                             | DnaJ domain, possible zf-CSL following                                                               |                                    |          |          | 1        |          | 1         | 14.780        |        |       |
|                         |                                                         | cgd4_2780                                                                            | DNAj domain protein having a signal peptide                                                          | 1                                  |          |          |          |          | 1         | 0.344         |        |       |
|                         |                                                         | cgd5_2950                                                                            | DNAj domain protein                                                                                  |                                    |          |          | 1        |          | 1         | 9.330         |        |       |
|                         |                                                         | cgd5_3520                                                                            | chaperone'DNAj domain protein chaperone'                                                             |                                    |          | 1        |          |          | 1         | 3.142         |        |       |
|                         |                                                         | cgd5_3530                                                                            | DNAj domain protein                                                                                  | 1                                  |          |          |          |          | 1         | 0.411         |        |       |
|                         |                                                         | cgd6_1190                                                                            | DNAJ protein-like, putative                                                                          | 1                                  |          |          |          |          | 1         | 0.348         |        |       |
|                         |                                                         | cgd6_2650                                                                            | heat shock protein, putative                                                                         |                                    | 1        |          |          |          | 1         | 2.095         |        |       |
|                         |                                                         | cgd7_3880                                                                            | DNAJ domain protein sec63 ortholog, 4 transmembrane domains                                          | 1                                  |          |          |          |          | 1         | 0.298         |        |       |
|                         |                                                         | cgd8_2820                                                                            | membrane associated DNAJ with 6 transmembrane domain, signal peptide                                 | 1                                  |          |          |          |          | 1         | 0.350         |        |       |
|                         |                                                         | cgd8_2860                                                                            | DNAJ protein                                                                                         |                                    |          | 1        |          |          | 1         | 5.557         |        |       |
|                         |                                                         | cgd8_3270                                                                            | DNAJ'DNAJ protein'                                                                                   |                                    |          |          | 1        |          | 1         | 22.075        |        |       |
|                         |                                                         | cgd8_3770                                                                            | DNAJ like chaperone                                                                                  |                                    |          |          |          | 1        | 1         | 183.367       |        |       |
|                         |                                                         | cgd8_450                                                                             | DNAj-like protein                                                                                    |                                    |          | 1        |          |          | 1         | 3.296         |        |       |
|                         | cgd8_4930                                               | DNAJ protein                                                                         | 1                                                                                                    |                                    |          |          |          | 1        | 0.352     |               |        |       |
|                         | DNAj Total                                              |                                                                                      |                                                                                                      |                                    | 7        | 1        | 5        | 4        | 2         | 19            | 15.926 |       |
|                         | HSP                                                     | cgd2_1800                                                                            | heat shock 40 kDa protein, putative                                                                  | 1                                  |          |          |          |          |           | 1             | 0.434  |       |
|                         |                                                         | cgd2_20                                                                              | heat shock 70 (HSP70) protein                                                                        |                                    |          |          |          | 1        | 1         | 417.813       |        |       |
|                         |                                                         | cgd3_3770                                                                            | Hsp90                                                                                                |                                    |          |          |          | 1        | 1         | 1,229.346     |        |       |
|                         |                                                         | cgd4_3270                                                                            | heat shock 105kD; heat shock 105kD alpha; heat shock 105kD beta; heat shock 105kDa protein 1         |                                    |          | 1        |          |          | 1         | 1.673         |        |       |
|                         |                                                         | cgd6_1630                                                                            | p23; HSP20-like chaperones fold                                                                      |                                    | 1        |          |          |          | 1         | 1.698         |        |       |
|                         |                                                         | cgd6_4970                                                                            | Hsp60; GroEL-like chaperone (ATpase), predicted mitochondrial                                        | 1                                  |          |          |          |          | 1         | 0.439         |        |       |
| cgd7_2400               |                                                         | chaperonin 10 Kd subunit, putative                                                   |                                                                                                      |                                    | 1        |          |          | 1        | 1.244     |               |        |       |
| cgd7_360                |                                                         | heat shock protein, Hsp70                                                            |                                                                                                      |                                    |          |          | 1        | 1        | 65.777    |               |        |       |
| cgd7_3670               |                                                         | heat shock protein 90 (Hsp90), signal peptide plus ER retention motif                |                                                                                                      |                                    | 1        |          |          | 1        | 1.640     |               |        |       |
| cgd8_1610               | sacsin like HSP90 chaperone domain, likely plant origin | 1                                                                                    |                                                                                                      |                                    |          |          | 1        | 0.335    |           |               |        |       |
| HSP Total               |                                                         |                                                                                      |                                                                                                      | 3                                  | 4        |          |          | 3        | 10        | 172.040       |        |       |
| Other                   | cgd2_1850                                               | stress-induced protein sti1-like protein, putative [Tetratricopeptide repeat domain] |                                                                                                      |                                    | 1        |          |          |          | 1         | 3.400         |        |       |
|                         | cgd3_3440                                               | heat shock protein HSP70, mitochondrial                                              |                                                                                                      |                                    |          | 1        |          | 1        | 3.006     |               |        |       |
|                         | cgd5_3510                                               | co-chaperone GrpE, putative                                                          |                                                                                                      |                                    |          | 1        |          | 1        | 3.351     |               |        |       |

|  |                        |                            |                                                                                     |                                                                                                                                                  |   |    |   |   |    |        |
|--|------------------------|----------------------------|-------------------------------------------------------------------------------------|--------------------------------------------------------------------------------------------------------------------------------------------------|---|----|---|---|----|--------|
|  |                        | cgd8_2340                  | cold shock RNA binding domain of the OB fold                                        |                                                                                                                                                  |   |    |   | 1 | 1  | 58.377 |
|  | Other Total            |                            |                                                                                     |                                                                                                                                                  |   | 3  |   | 1 | 4  | 17.033 |
|  | TCP1                   | cgd2_600                   | TCP1_alpha; TCP-1 (CTT or eukaryotic type II) chaperonin family, alpha subunit.     | 1                                                                                                                                                |   |    |   |   | 1  | 0.483  |
|  |                        | cgd2_900                   | TCP1_theta; TCP-1 (CTT or eukaryotic type II) chaperonin family, theta subunit.     |                                                                                                                                                  |   | 1  |   |   | 1  | 3.751  |
|  |                        | cgd4_3850                  | TCP1_gamma; TCP-1 (CTT or eukaryotic type II) chaperonin family, gamma subunit.     |                                                                                                                                                  |   | 1  |   |   | 1  | 1.847  |
|  |                        | cgd6_5080                  | TCP1_beta; TCP-1 (CTT or eukaryotic type II) chaperonin family, beta subunit.       |                                                                                                                                                  |   | 1  |   |   | 1  | 5.510  |
|  |                        | cgd7_3180                  | TCP1_epsilon; TCP-1 (CTT or eukaryotic type II) chaperonin family, epsilon subunit. |                                                                                                                                                  |   | 1  |   |   | 1  | 1.456  |
|  | TCP1 Total             |                            |                                                                                     | 1                                                                                                                                                | 2 | 2  |   |   | 5  | 2.609  |
|  | <b>Chaperone Total</b> |                            |                                                                                     | 11                                                                                                                                               | 7 | 10 | 4 | 6 | 38 | 55.373 |
|  | <b>Chromatin</b>       | Chromatin protein          | cgd1_1640                                                                           | chromatin protein with an AT hook and a PHD finger domain at the C-terminus                                                                      |   |    | 1 |   | 1  | 2.881  |
|  |                        |                            | cgd3_2540                                                                           | histone H3                                                                                                                                       |   |    |   | 1 | 1  | 33.649 |
|  |                        |                            | cgd4_3220                                                                           | histone H3                                                                                                                                       |   |    | 1 |   | 1  | 5.149  |
|  |                        |                            | cgd4_720                                                                            | putative nucleosome assembly protein 19075338; besthit Py 23481872                                                                               |   |    |   | 1 | 1  | 8.005  |
|  |                        |                            | cgd5_2130                                                                           | chromatin associated proein with a chromodomain at the C-terminus                                                                                |   |    | 1 |   | 1  | 3.175  |
|  |                        |                            | cgd5_3170                                                                           | histone H2B                                                                                                                                      |   |    | 1 |   | 1  | 3.830  |
|  |                        |                            | cgd5_940                                                                            | histone H2A                                                                                                                                      |   |    |   | 1 | 1  | 58.102 |
|  |                        |                            | cgd6_4510                                                                           | telomeric DNA binding protein; SANT DNA-binding domain                                                                                           |   |    |   | 1 | 1  | 5.823  |
|  |                        |                            | cgd7_1700                                                                           | histone H2B                                                                                                                                      |   |    |   | 1 | 1  | 75.694 |
|  |                        |                            | cgd8_2170                                                                           | histone H2A                                                                                                                                      |   |    | 1 |   | 1  | 3.817  |
|  |                        |                            | cgd8_2730                                                                           | multidomain chromatinic protein with the following architecture: 3x PHD-bromo-3xPHD-SET domain and associated cysteine cluster at the C-terminus | 1 |    | 1 |   | 1  | 0.474  |
|  |                        |                            | cgd8_3970                                                                           | NAP, nucleosome assembly protein                                                                                                                 |   |    | 1 |   | 1  | 2.736  |
|  |                        |                            | cgd8_5230                                                                           | histone H4                                                                                                                                       |   |    |   | 1 | 1  | 10.420 |
|  |                        | Chromatin protein Total    |                                                                                     |                                                                                                                                                  | 1 | 6  | 3 | 3 | 13 | 16.442 |
|  |                        | Chromatin remodeling       | cgd1_1330                                                                           | SWI/SNF-related, matrix associated, actin-dependent regulator of chromatin subfamily A containing DEAD/H box 1                                   |   |    | 1 |   | 1  | 3.424  |
|  |                        |                            | cgd3_3190                                                                           | GCN5 like acetylase + bromodomain                                                                                                                |   |    | 1 |   | 1  | 4.705  |
|  |                        |                            | cgd4_1340                                                                           | bromo domain containing protein                                                                                                                  | 1 |    |   |   | 1  | 0.321  |
|  |                        |                            | cgd6_1380                                                                           | histone deacetylase HDA2/Rpd3p                                                                                                                   |   |    |   | 1 | 1  | 18.823 |
|  |                        |                            | cgd6_2590                                                                           | histone acetyltransferase (MYST family); chromo domain + C2H2 domain                                                                             |   |    |   |   | 1  | 72.812 |
|  |                        |                            | cgd6_80                                                                             | RPD3/HD1 histone deacetylase                                                                                                                     |   |    |   | 1 | 1  | 6.611  |
|  |                        |                            | cgd7_2030                                                                           | bacterial-like Sir2 family protein (HDAC Class III)                                                                                              | 1 |    |   |   | 1  | 0.386  |
|  |                        |                            | cgd7_3600                                                                           | Hs17p, histone methylase                                                                                                                         | 1 |    |   |   | 1  | 0.410  |
|  |                        |                            | cgd7_3630                                                                           | TRF4/5 nucleotidyl transferase                                                                                                                   |   | 1  |   |   | 1  | 1.951  |
|  |                        |                            | cgd7_5210                                                                           | bromodomain protein                                                                                                                              |   |    |   |   | 1  | 24.589 |
|  |                        |                            | cgd7_60                                                                             | Hat1-like acetyltransferase (histone acetyltransferase-like)                                                                                     | 1 |    |   |   | 1  | 0.381  |
|  |                        |                            | cgd8_480                                                                            | histone deactylase of possible bacterial origin with ankyrin repeats at the N-terminus                                                           | 1 |    |   |   | 1  | 0.368  |
|  |                        | Chromatin remodeling Total |                                                                                     |                                                                                                                                                  | 5 | 1  | 2 | 2 | 12 | 11.232 |
|  | <b>Chromatin Total</b> |                            |                                                                                     |                                                                                                                                                  | 6 | 1  | 8 | 5 | 25 | 13.941 |
|  | <b>DNA metabolism</b>  | DNA repair                 | cgd1_2840                                                                           | contains a UVDBB domain that is present in CPSF_A and damage specific DNA binding protein 1                                                      |   |    | 1 |   | 1  | 2.397  |
|  |                        |                            | cgd1_310                                                                            | AP endonuclease of the TIM barrel fold, possible bacterial horizontal transfer                                                                   |   |    | 1 |   | 1  | 1.803  |
|  |                        |                            | cgd2_700                                                                            | PMS1'MutL family ATPase'                                                                                                                         |   |    | 1 |   | 1  | 2.247  |
|  |                        |                            | cgd4_140                                                                            | Swi2/Snf2 ATPase,Rad16 ortholog                                                                                                                  |   |    |   | 1 | 1  | 17.634 |
|  |                        |                            | cgd4_2960                                                                           | ERCC4/XP-G-type excision repair nuclease                                                                                                         | 1 |    |   |   | 1  | 0.408  |
|  |                        |                            | cgd4_2970                                                                           | RAD1, NH2 terminal ERCC4-like helicase domain                                                                                                    | 1 |    |   |   | 1  | 0.370  |
|  |                        |                            | cgd5_1900                                                                           | XPA binding protein 1                                                                                                                            |   |    |   | 1 | 1  | 7.154  |
|  |                        |                            | cgd5_2190                                                                           | Nuc1p like endonuclease G                                                                                                                        |   |    | 1 |   | 1  | 1.710  |
|  |                        |                            | cgd5_410                                                                            | Rad51                                                                                                                                            | 1 |    |   |   | 1  | 0.401  |
|  |                        |                            | cgd5_4290                                                                           | Swi/SNF2 RAD26                                                                                                                                   |   |    | 1 |   | 1  | 5.193  |
|  |                        |                            | cgd6_1530                                                                           | DNA repair protein Rad4p                                                                                                                         |   |    | 1 |   | 1  | 1.856  |
|  |                        |                            | cgd6_2610                                                                           | ERCC1 excision repair 1; C-terminal HhH domain                                                                                                   | 1 | 1  |   |   | 2  | 1.064  |
|  |                        |                            | cgd6_2660                                                                           | DNA repair helicase                                                                                                                              |   |    | 1 |   | 1  | 1.976  |
|  |                        |                            | cgd6_2770                                                                           | uvb-resistance protein uvr8, putative                                                                                                            | 1 |    |   |   | 1  | 0.484  |
|  |                        |                            | cgd7_2090                                                                           | Ruv DNA-helicase-related protein                                                                                                                 |   |    |   | 1 | 1  | 10.664 |
|  |                        |                            | cgd7_2660                                                                           | RAD24/Rf-C activator 1 AAA+ ATPase                                                                                                               |   |    |   | 1 | 1  | 14.760 |
|  |                        |                            | cgd7_3350                                                                           | eukaryotic DNA topoisomerase I                                                                                                                   |   |    | 1 |   | 1  | 1.872  |
|  |                        |                            | cgd7_4730                                                                           | RAD23p, UB+UBA domains protein                                                                                                                   | 1 |    |   |   | 1  | 0.571  |
|  |                        |                            | cgd7_80                                                                             | XPA1 binding protein-like GTPase                                                                                                                 |   |    | 1 |   | 1  | 1.255  |
|  |                        |                            | cgd7_820                                                                            | RAD3'DEXDc+HELICc protein'                                                                                                                       | 1 |    |   |   | 1  | 0.389  |
|  |                        |                            | cgd8_1940                                                                           | RAD25, helicase involved in DNA repair                                                                                                           | 1 |    |   |   | 1  | 0.308  |
|  |                        |                            | cgd8_3210                                                                           | UvrD like super family I helicase involved in nucleotide excision repair, possible bacterial horizontal transfer                                 | 1 |    |   |   | 1  | 0.510  |
|  |                        | DNA repair Total           |                                                                                     |                                                                                                                                                  | 9 | 8  | 2 | 4 | 23 | 3.308  |
|  |                        | DNA replication            | cgd1_3410                                                                           | DNA replication complex GINS protein PSF2, putative                                                                                              | 1 |    |   |   | 1  | 0.317  |
|  |                        |                            | cgd2_1100                                                                           | DNA replication licensing factor MCM2 like AAA+ ATPase                                                                                           | 1 |    |   |   | 1  | 0.421  |
|  |                        |                            | cgd2_1250                                                                           | DNA replication licensing factor MCM4 like AAA+ ATPase                                                                                           | 1 |    |   |   | 1  | 0.303  |
|  |                        |                            | cgd2_1600                                                                           | DNA replication licensing factor MCM3 like                                                                                                       | 1 |    |   |   | 1  | 0.418  |

|        |                   |                       |                                                                                                                   |    |    |   |   |   |    |         |
|--------|-------------------|-----------------------|-------------------------------------------------------------------------------------------------------------------|----|----|---|---|---|----|---------|
|        |                   | cgd2_2500             | DNA polymerase epsilon subunit                                                                                    | 1  |    |   |   |   | 1  | 0.332   |
|        |                   | cgd2_2730             | Po1 beta superfamily nucleotidyltransferase                                                                       |    |    | 1 |   |   | 1  | 2.854   |
|        |                   | cgd2_3180             | replication factor C subunit 5, putative                                                                          | 1  | 1  |   |   |   | 2  | 0.854   |
|        |                   | cgd2_4080             | RP-A, OB fold single strand binding protein                                                                       | 1  |    |   |   |   | 1  | 0.403   |
|        |                   | cgd3_1450             | replication factor C like AAA+ ATPase                                                                             | 1  |    |   |   |   | 1  | 0.503   |
|        |                   | cgd3_2210             | replication protein A1 large subunit                                                                              | 1  |    |   |   |   | 1  | 0.386   |
|        |                   | cgd3_2720             | putative topoisomerase VIA                                                                                        | 1  |    |   |   |   | 1  | 0.432   |
|        |                   | cgd3_3170             | replication factor RFC3 AAA+ ATPase                                                                               | 1  |    |   |   |   | 1  | 0.344   |
|        |                   | cgd3_3820             | DNA LIGASE I                                                                                                      | 1  |    |   |   |   | 1  | 0.324   |
|        |                   | cgd3_390              | RecQ SF II RNA helicase, DEXDc+HELICc                                                                             |    |    |   |   | 1 | 1  | 5.986   |
|        |                   | cgd3_4290             | DNA polymerase alpha catalytic subunit                                                                            | 1  |    |   |   |   | 1  | 0.527   |
|        |                   | cgd4_3920             | DinB/family X-type DNA polymerase                                                                                 | 1  |    |   |   |   | 1  | 0.429   |
|        |                   | cgd4_780              | DNA topoisomerase II                                                                                              | 1  |    |   |   |   | 1  | 0.430   |
|        |                   | cgd4_970              | DNA replication licensing factor MCM7 like AAA+ ATPase                                                            | 1  |    |   |   |   | 1  | 0.347   |
|        |                   | cgd5_1180             | DNA topoisomerase III, putative                                                                                   | 1  |    |   |   |   | 1  | 0.529   |
|        |                   | cgd6_2390             | DNA topoisomerase III beta-1, putative                                                                            |    |    | 1 |   |   | 1  | 1.911   |
|        |                   | cgd6_240              | DNA replication licensing factor MCM6-like AAA ATPase                                                             | 1  |    |   |   |   | 1  | 0.422   |
|        |                   | cgd6_4410             | DNA polymerase delta catalytic subunit. DNAQ-like 3'-5' exonuclease; RNAseH fold                                  | 1  |    |   |   |   | 1  | 0.421   |
|        |                   | cgd6_4420             | RecQ bloom helicase (RNA helicase+hrdc)                                                                           |    |    | 1 |   |   | 1  | 1.573   |
|        |                   | cgd7_1690             | meiotic recombination protein DMC1-like protein                                                                   | 1  |    |   |   |   | 1  | 0.395   |
|        |                   | cgd7_4690             | RF-C paralog (Ctf18p) AAA+ ATPase                                                                                 | 1  | 1  |   |   |   | 2  | 0.900   |
|        |                   | cgd8_1240             | DNA polymerase epsilon catalytic subunit                                                                          | 1  |    |   |   |   | 1  | 0.362   |
|        |                   | cgd8_1350             | topoisomerase VIA/Spoll nuclease subunit, toprim domain                                                           | 1  |    |   |   |   | 1  | 0.392   |
|        |                   | cgd8_1410             | DNA primase large subunit                                                                                         | 1  |    |   |   |   | 1  | 0.430   |
|        |                   | cgd8_1620             | DNA polymerase delta2, inactive calcineurin like phosphatase subunit                                              | 1  |    |   |   |   | 1  | 0.419   |
|        |                   | cgd8_2940             | replication factor C like AAA ATPase                                                                              | 1  |    |   |   |   | 1  | 0.416   |
|        |                   | cgd8_4950             | RecQ4 SF II RNA helicase                                                                                          | 1  |    |   |   |   | 1  | 0.458   |
|        |                   | cgd8_610              | DNA replication repC1, AAA+ ATPase with a BRCT domain at the N-terminus                                           | 1  |    |   |   |   | 1  | 0.561   |
|        |                   | cgd8_870              | DNA dependent DNA polymerase alpha subunit, inactive calcineurin like phosphatase subunit                         | 1  |    |   |   |   | 1  | 0.396   |
|        |                   | DNA replication Total |                                                                                                                   | 29 | 4  | 1 | 1 |   | 35 | 0.770   |
|        | Other             | cgd1_2680             | HUSSY-3 like methyltransferase                                                                                    |    |    |   |   | 1 | 1  | 174.010 |
|        |                   | cgd1_3420             | conserved possible MUS81 endonuclease                                                                             | 1  |    |   |   |   | 1  | 0.329   |
|        |                   | cgd1_3530             | Gbp1/Gbp2p-like, putative single stranded G-strand telomeric DNA-binding protein                                  |    |    |   |   | 1 | 1  | 60.981  |
|        |                   | cgd2_2120             | high mobility group small protein                                                                                 |    |    | 1 |   |   | 1  | 1.762   |
|        |                   | cgd2_3070             | high mobility group (HMG)-box                                                                                     |    |    |   |   | 1 | 1  | 425.649 |
|        |                   | cgd2_4190             | DEXDc+HELICc, mus308/POLQ like SFII DNA helicase, no polymerase domain                                            | 1  |    |   |   |   | 1  | 0.383   |
|        |                   | cgd2_4280             | holiday junction resolvase, S1x1p, URI domain nuclease                                                            | 1  |    |   |   |   | 1  | 0.463   |
|        |                   | cgd5_3460             | nucleotidase (5'-nucleotidase/2'-cyclic phosphodiesterase) of the calcineurin superfamily                         | 1  |    |   |   |   | 1  | 0.650   |
|        |                   | cgd6_1580             | exonuclease i/din7p-like; xeroderma pigmentosum G N-region plus xeroderma pigmentosum G I-region plus HhH2 domain | 1  |    |   |   |   | 1  | 0.390   |
|        |                   | cgd7_1720             | endonuclease III, putative                                                                                        | 1  |    |   |   |   | 1  | 0.395   |
|        |                   | cgd7_2140             | flap endonuclease 1                                                                                               | 1  |    |   |   |   | 1  | 0.321   |
|        |                   | cgd8_340              | exoribonuclease PH, putative                                                                                      | 1  |    |   |   |   | 1  | 0.359   |
|        |                   | Other Total           |                                                                                                                   | 8  | 1  |   |   | 3 | 12 | 55.474  |
|        |                   | DNA metabolism Total  |                                                                                                                   | 46 | 13 | 3 | 5 | 3 | 70 | 10.982  |
| Enzyme | AA synthesis      | cgd3_80               | S-adenosylhomocysteinase EC 3.3.1.1                                                                               | 1  |    |   |   |   | 1  | 0.657   |
|        |                   | cgd5_4540             | asparagine synthetase A (AsnA) like protein                                                                       |    |    | 1 |   |   | 1  | 2.114   |
|        |                   | cgd5_4560             | tryptophan synthase trpB of possible bacterial origin                                                             | 1  |    |   |   |   | 1  | 0.431   |
|        |                   | cgd6_3720             | pyrroline-5-carboxylate reductase                                                                                 | 1  |    |   | 1 |   | 2  | 4.051   |
|        |                   | cgd7_2650             | s-adenosylmethionine synthetase (SAM) EC 2.5.1.6                                                                  |    |    |   | 1 |   | 1  | 8.223   |
|        |                   | cgd7_4940             | gamma-glutamyl phosphate reductase family protein                                                                 | 1  |    |   |   |   | 1  | 0.567   |
|        |                   | cgd8_2580             | mitochondrial serine hydroxymethyl transferase                                                                    | 1  |    |   |   |   | 1  | 0.465   |
|        |                   | cgd8_2610             | cytosolic serine hydroxymethyl transferase                                                                        | 1  |    |   |   |   | 1  | 0.567   |
|        |                   | AA synthesis Total    |                                                                                                                   | 6  | 1  |   | 2 |   | 9  | 2.347   |
|        | AA-tRNA synthesis | cgd1_2130             | glutamyl-tRNA synthetase, of predicted bacterial origin                                                           |    |    |   |   | 1 | 1  | 24.646  |
|        |                   | cgd3_3320             | putative phenylalanyl-tRNA synthetase                                                                             |    |    |   | 1 |   | 1  | 4.640   |
|        |                   | cgd3_3840             | isoleucine-tRNA synthetase                                                                                        |    |    |   | 1 |   | 1  | 2.270   |
|        |                   | cgd6_2970             | tyrosyl-tRNA synthetase (tyrosyl-tRNA ligase; TyrRS). class-I aaRS                                                |    |    | 1 |   |   | 1  | 2.173   |
|        |                   | cgd6_4400             | proline-tRNA synthetase; class II aaRS (ybak RNA binding domain plus tRNA synthetase)                             | 1  |    |   |   |   | 1  | 0.311   |
|        |                   | cgd6_560              | alanyl-tRNA synthetase (with HxxxH domain)                                                                        |    |    | 1 |   |   | 1  | 1.651   |
|        |                   | cgd6_960              | cysteiny-tRNA synthetase                                                                                          |    |    |   |   | 1 | 1  | 45.100  |
|        |                   | cgd7_1490             | tryptophanyl-tRNA synthetase                                                                                      |    |    |   | 1 |   | 1  | 5.739   |
|        |                   | cgd7_1540             | aspartate--tRNA ligase                                                                                            |    |    |   |   | 1 | 1  | 102.610 |
|        |                   | cgd7_1710             | threonyl-tRNA synthetase (RNA binding domain TGS+HxxxH+tRNA synthetase)                                           | 1  |    |   |   |   | 1  | 0.565   |
|        |                   | cgd8_3100             | valyl-tRNA synthetase                                                                                             |    |    | 1 |   |   | 1  | 2.110   |
|        |                   | cgd8_3320             | phenylalanyl-tRNA synthetase beta chain                                                                           | 1  |    |   |   |   | 1  | 0.383   |
|        |                   | cgd8_3460             | methionyl-tRNA synthetase of possible bacterial origin                                                            | 1  |    |   |   |   | 1  | 0.372   |
|        |                   | cgd8_350              | asparaginy-tRNA synthetase (NOB+tRNA synthase)                                                                    |    |    |   | 1 |   | 1  | 10.701  |
|        |                   | cgd8_4010             | histidyl-tRNA synthetase                                                                                          |    |    |   | 1 |   | 1  | 4.239   |

|                         |           |                                                                                                                                                         |   |   |   |   |   |    |           |
|-------------------------|-----------|---------------------------------------------------------------------------------------------------------------------------------------------------------|---|---|---|---|---|----|-----------|
|                         | cgd8_4720 | seryl-tRNA synthetase, cytoplasmic                                                                                                                      |   |   | 1 |   |   | 1  | 3.620     |
|                         | cgd8_790  | glutamate--tRNA ligase                                                                                                                                  | 1 |   |   |   |   | 1  | 0.357     |
| AA-tRNA synthesis Total |           |                                                                                                                                                         | 5 | 3 | 4 | 3 | 2 | 17 | 12.440    |
| Energy                  |           |                                                                                                                                                         | 1 |   |   |   |   |    | 0.320     |
|                         | cgd1_1710 | phosphoglycerate mutase                                                                                                                                 | 1 |   |   |   |   | 1  | 0.320     |
|                         | cgd1_2040 | pyruvate kinase                                                                                                                                         |   |   | 1 |   |   | 1  | 4.077     |
|                         | cgd1_3020 | fructose-1,6-bisphosphate aldolase                                                                                                                      |   |   |   | 1 |   | 1  | 16.932    |
|                         | cgd1_3040 | triosephosphate isomerase                                                                                                                               |   |   | 1 |   |   | 1  | 2.966     |
|                         | cgd2_210  | glycerol-3-phosphate dehydrogenase                                                                                                                      |   | 1 |   |   |   | 1  | 1.886     |
|                         | cgd2_2130 | pyrophosphate-dependent phosphofructokinase                                                                                                             |   |   | 1 |   |   | 1  | 3.315     |
|                         | cgd2_2340 | R1 like alpha-glucan water dikinase                                                                                                                     |   |   | 1 |   |   | 1  | 5.585     |
|                         | cgd2_3260 | phosphoglucomutase, tandemly duplicated gene                                                                                                            |   |   |   |   | 1 | 1  | 35.506    |
|                         | cgd2_3270 | phosphoglucomutase, tandemly duplicated gene                                                                                                            |   |   |   |   | 1 | 1  | 38.373    |
|                         | cgd3_1400 | pyrophosphate-dependent 6-phosphofructokinase                                                                                                           | 1 |   |   |   |   | 1  | 0.583     |
|                         | cgd3_1580 | alpha glucosidase-like family 31 glycosyl hydrolases                                                                                                    |   |   | 1 |   |   | 1  | 2.422     |
|                         | cgd4_690  | pyruvate:ferredoxin oxidoreductase/NADPH-cytochrome P450 reductase PNO                                                                                  |   | 1 |   |   |   | 1  | 1.539     |
|                         | cgd5_1960 | enolase (2-phosphoglycerate dehydratase)                                                                                                                |   |   |   |   | 1 | 1  | 323.176   |
|                         | cgd5_2910 | alpha amylase                                                                                                                                           | 1 | 1 |   |   |   | 2  | 1.076     |
|                         | cgd5_70   | phosphoenolpyruvate carboxylase                                                                                                                         |   | 1 |   |   |   | 1  | 1.637     |
|                         | cgd5_750  | Mdh; malate dehydrogenase (oxaloacetate-decarboxylating)(NADP+)                                                                                         |   |   |   | 1 |   | 1  | 9.706     |
|                         | cgd6_2450 | glycogen phosphorylase                                                                                                                                  |   |   |   | 1 |   | 1  | 12.787    |
|                         | cgd6_3280 | glycogen branching enzyme (1,4-alpha-glucan branching enzyme)                                                                                           |   | 1 |   |   |   | 1  | 1.291     |
|                         | cgd6_3790 | glyceraldehyde 3-phosphate dehydrogenase                                                                                                                |   |   |   |   | 1 | 1  | 143.725   |
|                         | cgd6_3800 | hexokinase                                                                                                                                              |   |   | 1 |   |   | 1  | 3.319     |
|                         | cgd6_4330 | phosphoglycerate mutase family                                                                                                                          | 1 |   |   |   |   | 1  | 0.427     |
|                         | cgd6_4900 | acylphosphatase, putative                                                                                                                               |   |   |   |   | 1 | 1  | 65.078    |
|                         | cgd6_880  | Gdb1p; glycogen debranching enzyme                                                                                                                      |   |   | 1 |   |   | 1  | 2.503     |
|                         | cgd7_3120 | pyruvate decarboxylase                                                                                                                                  |   |   |   | 1 |   | 1  | 13.325    |
|                         | cgd7_4270 | glycolytic phosphoglycerate mutase                                                                                                                      |   |   |   | 1 |   | 1  | 15.288    |
|                         | cgd7_470  | malate dehydrogenase, adjacent gene encodes predicted lactate dehydrogenase                                                                             |   |   |   | 1 |   | 1  | 10.334    |
|                         | cgd7_480  | lactate dehydrogenase, adjacent gene encodes predicted malate dehydrogenase                                                                             |   |   |   |   | 1 | 1  | 3,064.620 |
|                         | cgd8_1720 | acetaldehyde reductase plus alcohol dehydrogenase (AdhE) of possible bacterial origin                                                                   |   |   |   | 1 |   | 1  | 6.279     |
| Energy Total            |           |                                                                                                                                                         | 4 | 5 | 7 | 7 | 6 | 29 | 130.660   |
| General                 |           |                                                                                                                                                         |   |   |   |   |   |    |           |
|                         | cgd1_1080 | alpha beta hydrolase                                                                                                                                    |   | 1 |   |   |   | 1  | 1.296     |
|                         | cgd1_1100 | alpha beta hydrolase with 5 transmembrane domains                                                                                                       | 1 |   |   |   |   | 1  | 0.547     |
|                         | cgd1_1730 | haloacid dehalogenase family-like horizontal transfer into apicomplexans, signal peptide                                                                |   |   | 1 |   |   | 1  | 4.116     |
|                         | cgd1_2750 | AAA superfamily ATPase                                                                                                                                  | 1 |   |   |   |   | 1  | 0.384     |
|                         | cgd1_280  | short chain dehydrogenase/reductase of the rossmann fold, signal peptide                                                                                |   | 1 |   |   |   | 1  | 2.273     |
|                         | cgd1_3390 | katanin p60/fidgetin family AAA ATPase                                                                                                                  |   | 1 |   |   |   | 1  | 2.028     |
|                         | cgd1_3610 | secreted protein of the alpha beta hydrolase superfamily, signal peptide                                                                                |   |   |   |   | 1 | 1  | 8.260     |
|                         | cgd1_3730 | glucosamine-fructose-6-phosphate aminotransferase                                                                                                       | 1 |   |   |   |   | 1  | 0.462     |
|                         | cgd1_990  | pyridine nucleotide/ NAD(P) transhydrogenase alpha plus beta subunits, duplicated gene, 12 transmembrane domain                                         | 1 |   |   |   |   | 1  | 0.432     |
|                         | cgd2_1120 | putative molybdopterin synthase sulphurylase                                                                                                            |   |   |   | 1 |   | 1  | 10.116    |
|                         | cgd2_1190 | methylase                                                                                                                                               |   | 1 |   |   |   | 1  | 2.094     |
|                         | cgd2_2170 | Ynr053p-like, Yjeq GTPase                                                                                                                               |   |   |   | 1 |   | 1  | 23.790    |
|                         | cgd2_380  | COG0237: dephospho-CoA kinase                                                                                                                           | 1 |   |   |   |   | 1  | 0.439     |
|                         | cgd2_3880 | possible AAA domain containing protein                                                                                                                  | 1 |   |   |   |   | 1  | 0.335     |
|                         | cgd3_1360 | methylase                                                                                                                                               | 1 |   |   |   |   | 1  | 0.510     |
|                         | cgd3_2050 | putative prolyl 4-hydroxylase alpha subunit homolog, 2-oxoglutarate-dependent dioxygenase                                                               | 1 |   |   |   |   | 1  | 0.300     |
|                         | cgd3_2290 | possible domain AAA, ATPase family                                                                                                                      |   |   |   | 1 |   | 1  | 17.443    |
|                         | cgd3_330  | scully CG7113-PA, putative                                                                                                                              |   |   |   |   | 1 | 1  | 356.414   |
|                         | cgd3_3910 | prolyl 4-hydroxylase alpha subunit                                                                                                                      |   |   |   | 1 |   | 1  | 14.869    |
|                         | cgd3_990  | CG6144-like AlkB                                                                                                                                        | 1 |   |   |   |   | 1  | 0.303     |
|                         | cgd4_1130 | PhnP like hydrolase of the metallobeta-lactamase fold                                                                                                   | 1 |   |   |   |   | 1  | 0.297     |
|                         | cgd4_1940 | putative nucleoside-diphosphate kinase                                                                                                                  |   |   |   | 1 |   | 1  | 16.183    |
|                         | cgd4_1960 | ThiF/moeB family                                                                                                                                        |   |   | 1 |   |   | 1  | 2.540     |
|                         | cgd4_2250 | putative phosphopantothenoylcysteine synthetase                                                                                                         | 1 |   |   |   |   | 1  | 0.434     |
|                         | cgd4_2270 | oxidoreductase, short-chain dehydrogenase family, putative                                                                                              |   |   | 1 |   |   | 1  | 4.526     |
|                         | cgd4_2550 | putative farnesyl pyrophosphate synthase                                                                                                                |   |   | 1 |   |   | 1  | 1.750     |
|                         | cgd4_430  | ORC5 like AAA+ ATPase                                                                                                                                   |   | 1 |   |   |   | 1  | 1.147     |
|                         | cgd4_4320 | ORC/CDC6 like AAA+ ATPase                                                                                                                               | 1 |   |   |   |   | 1  | 0.366     |
|                         | cgd5_1170 | CPSF metallobeta-lactamase                                                                                                                              | 1 |   |   |   |   | 1  | 0.342     |
|                         | cgd5_2010 | nuclear VCP like protein with 2 AAA ATPase domains                                                                                                      |   |   |   |   | 1 | 1  | 54.188    |
|                         | cgd5_2410 | conserved possible esterase of the beta-lactamase family, of possible plant or bacterial origin, possible transmembrane domain within N terminal region | 1 |   |   |   |   | 1  | 0.407     |
|                         | cgd5_2670 | predicted mannitol dehydrogenase; zinc dependent alcohol dehydrogenase like rossmann fold                                                               | 1 |   |   |   |   | 1  | 0.404     |
|                         | cgd5_2790 | katanin p60/fidgetin family with AAA ATPase                                                                                                             |   |   |   | 1 |   | 1  | 6.005     |

|  |               |                                                                                                                                                                             |    |    |   |    |   |    |         |
|--|---------------|-----------------------------------------------------------------------------------------------------------------------------------------------------------------------------|----|----|---|----|---|----|---------|
|  | cgd5_3090     | N-acetyltransferase subunit ARD1                                                                                                                                            | 1  |    |   |    |   | 1  | 0.350   |
|  | cgd5_310      | putative polyphosphate synthetase VTC4, 3 transmembrane domains at C-terminus                                                                                               |    |    |   | 1  |   | 1  | 7.600   |
|  | cgd5_3110     | MDN1, midasin                                                                                                                                                               | 1  |    |   |    |   | 1  | 0.302   |
|  | cgd5_3960     | secreted protein of the alpha beta hydrolase superfamily                                                                                                                    |    |    |   |    | 1 | 1  | 29.019  |
|  | cgd5_4330     | conserved methylase                                                                                                                                                         |    |    |   | 1  |   | 1  | 14.596  |
|  | cgd5_460      | possible alpha beta hydrolase                                                                                                                                               | 1  |    |   |    |   | 1  | 0.364   |
|  | cgd5_900      | MRP like MinD family ATPase                                                                                                                                                 |    | 1  |   |    |   | 1  | 1.579   |
|  | cgd6_1800     | acetyltransferase, GNAT family                                                                                                                                              | 1  |    |   |    |   | 1  | 0.338   |
|  | cgd6_2820     | 2 SAM dependent methyltransferase; S-adenosyl-L-methionine-dependent methyltransferases + spermidine synthase (SAM dependent methyltransferase)                             |    | 1  |   |    |   | 1  | 1.446   |
|  | cgd6_4020     | phosphodiesterase, putative                                                                                                                                                 | 1  |    |   |    |   | 1  | 0.329   |
|  | cgd6_4270     | MinD type ATPase                                                                                                                                                            |    |    |   |    | 1 | 1  | 8.560   |
|  | cgd6_4380     | phosphatase subunit gene g4-1; of possible animal origin; EF-hand, calcium binding domains                                                                                  | 1  |    |   |    | 1 | 1  | 0.390   |
|  | cgd6_550      | Pch2p like AAA ATPase                                                                                                                                                       | 1  |    |   |    |   | 1  | 0.267   |
|  | cgd7_1410     | AAA domain containing protein                                                                                                                                               |    |    |   |    | 1 | 1  | 9.647   |
|  | cgd7_160      | putative methyltransferase-related                                                                                                                                          |    |    |   |    |   | 1  | 44.371  |
|  | cgd7_1640     | SRP54. signal recognition 54. GTPase.                                                                                                                                       |    |    |   |    | 1 | 1  | 19.559  |
|  | cgd7_2310     | ORC/CDC6 like AAA ATPase                                                                                                                                                    | 1  |    |   |    |   | 1  | 0.307   |
|  | cgd7_2970     | possible acyltransferase                                                                                                                                                    | 1  |    |   |    |   | 1  | 0.438   |
|  | cgd7_3390     | secreted alpha beta hydrolyse, signal peptide, secreted patatin like esterase (ralstonia best hits)                                                                         |    |    |   |    | 1 | 1  | 13.972  |
|  | cgd7_3730     | long chain fatty acyl diphosphate synthase [Trans-Isoprenyl Diphosphate Synthase]                                                                                           | 1  |    |   |    |   | 1  | 0.346   |
|  | cgd7_4590     | Mth1. SpoU superfamily - SPOUT methylase                                                                                                                                    |    |    |   |    | 1 | 1  | 15.971  |
|  | cgd7_5250     | methyltransfer with N-terminal ankyrin repeats                                                                                                                              |    |    |   |    | 1 | 1  | 10.963  |
|  | cgd8_1700     | NAD dependent dehydrogenase of possible bacterial origin                                                                                                                    | 1  |    |   |    |   | 1  | 0.442   |
|  | cgd8_1970     | NAD kinase involved in polyphosphate metabolism                                                                                                                             | 1  |    |   |    |   | 1  | 0.541   |
|  | cgd8_2330     | pyridine nucleotide/ NAD(P) transhydrogenase alpha plus beta subunits, duplicated gene, possible signal peptide plus 12 transmembrane regions                               |    |    |   |    | 1 | 1  | 6.516   |
|  | cgd8_2410     | Sey1p like P-loop GTPase of the RHD3 subfamily with a transmembrane domain near C-terminus                                                                                  | 1  |    |   |    |   | 1  | 0.373   |
|  | cgd8_2670     | secreted glucose methanol choline like oxidoreductase of the FAD dependent oxidoreductase like fold, signal peptide                                                         |    |    |   |    | 1 | 1  | 3.668   |
|  | cgd8_2700     | phenol 2-monooxygenase like FAD dependent oxidoreductase of plant origin in apicomplexans                                                                                   | 1  |    |   |    |   | 1  | 0.349   |
|  | cgd8_3140     | MRP like MinD family ATPase of the SIMIBI class of P-loop GTPases                                                                                                           |    | 1  |   |    |   | 1  | 1.958   |
|  | cgd8_3290     | secreted bacterial type DHHB/UbiG like methyltransferase involved in ubiquinone/menaquinone biosynthesis, signal peptide                                                    |    | 1  |   |    |   | 1  | 1.762   |
|  | cgd8_380      | possible oxidase or dehydrogenase                                                                                                                                           |    |    |   |    | 1 | 1  | 7.001   |
|  | cgd8_3880     | secreted alpha beta hydrolase family protein, signal peptide, duplicated adjacent gene                                                                                      | 1  |    |   |    |   | 1  | 0.452   |
|  | cgd8_4130     | secreted hydrolase superfamily, signal peptide                                                                                                                              | 1  |    |   |    |   | 1  | 0.365   |
|  | cgd8_4230     | FAD/NAD(P)-binding rossman fold oxidoreductase fused to a glucose-methanol-choline (GMC) oxidoreductase domain                                                              | 1  |    |   |    |   | 1  | 0.529   |
|  | cgd8_5260     | Srp101p GTPase. signal recognition particle receptor alpha subunit                                                                                                          | 1  |    |   |    |   | 1  | 0.361   |
|  | cgd8_590      | alpha/beta hydrolase superfamily protein                                                                                                                                    | 1  |    |   |    |   | 1  | 0.469   |
|  | cgd8_600      | secreted alpha/beta hydrolase superfamily protein                                                                                                                           |    |    |   |    |   | 1  | 114.509 |
|  | General Total |                                                                                                                                                                             | 34 | 10 | 4 | 17 | 5 | 70 | 12.214  |
|  | Glycosylation |                                                                                                                                                                             |    |    |   |    |   |    |         |
|  | cgd1_230      | ALG-2 like alpha-1,3 mannosyltransferase                                                                                                                                    | 1  |    |   |    |   | 1  | 0.356   |
|  | cgd2_1650     | dolichyl-diphosphooligosaccharide-protein glycosyltransferase beta subunit (Wbp1p)                                                                                          | 1  |    |   |    |   | 1  | 0.440   |
|  | cgd3_3590     | dolichyl-phosphate-mannose-glycolipid alpha-mannosyltransferase involved in GPI anchor biosynthesis                                                                         | 1  |    |   |    |   | 1  | 0.290   |
|  | cgd4_2990     | glycosyl transferase                                                                                                                                                        |    |    |   |    | 1 | 1  | 10.754  |
|  | cgd4_3120     | ALG6-like dolichyl pyrophosphate Man9GlcNAc2 alpha-1,3-glycosyltransferase                                                                                                  | 1  |    |   |    |   | 1  | 0.389   |
|  | cgd5_2040     | dolichol phosphate mannose synthase, putative                                                                                                                               |    | 1  |   |    |   | 1  | 1.321   |
|  | cgd5_2240     | DPAGT1 like N-acetylglucosamine-1-phosphate transferase                                                                                                                     |    |    |   |    | 1 | 1  | 11.320  |
|  | cgd5_2590     | Alg5 like dolichyl-phosphate beta-glycosyltransferase                                                                                                                       | 1  |    |   |    |   | 1  | 0.487   |
|  | cgd5_3140     | LPS glycosyltransferase of possible cyanobacterial origin                                                                                                                   |    |    |   |    | 1 | 1  | 4.376   |
|  | cgd5_3260     | secreted lipopolysaccharide sugar transferase like family 8 glycosyltransferase                                                                                             | 1  |    |   |    |   | 1  | 0.332   |
|  | cgd5_690      | extracellular protein with a ricin domain and a family 2 glycosyltransferase domain                                                                                         |    | 1  |   |    |   | 1  | 1.863   |
|  | cgd6_1450     | secreted protein with signal peptide, fringe-like glycosyltransferase domain and a WcaK like glycosyltransferase domain                                                     |    |    |   |    | 1 | 1  | 2.714   |
|  | cgd6_2040     | oligosaccharyl transferase STT3 protein                                                                                                                                     |    |    |   |    | 1 | 1  | 20.928  |
|  | cgd6_5070     | ribophorin I -like, putative dolichyl-diphosphooligosaccharide--protein glycosyltransferase 67kDa subunit precursor, signal peptide plus transmembrane domain at C-terminus | 1  |    |   |    |   | 1  | 0.375   |
|  | cgd7_1810     | ALG1 like beta-1,4 mannosyltransferase with possible signal peptide                                                                                                         | 1  |    |   |    |   | 1  | 0.455   |
|  | cgd7_4440     | family 2 glycosyl transferase, possible fragment                                                                                                                            | 1  |    |   |    |   | 1  | 0.354   |
|  | cgd7_4930     | secreted glycosyltransferase, possible transmembrane domain near C-terminus                                                                                                 |    |    |   |    | 1 | 1  | 3.535   |

|            |                     |                                                                                                                                         |    |   |   |    |   |    |         |
|------------|---------------------|-----------------------------------------------------------------------------------------------------------------------------------------|----|---|---|----|---|----|---------|
|            | cgd8_1420           | secreted alpha glucosidase like family 31 glycosyltransferase, signal peptide                                                           | 1  |   |   |    |   | 1  | 0.361   |
|            | Glycosylation Total |                                                                                                                                         | 10 | 2 | 3 | 3  |   | 18 | 3.369   |
| Lipid      | cgd1_1110           | phosphatidylserine synthase I (serine-exchange enzyme I), 9x transmembrane domains                                                      |    | 1 |   |    |   | 1  | 1.712   |
|            | cgd1_320            | oxysterol binding protein                                                                                                               |    |   | 1 |    |   | 1  | 2.983   |
|            | cgd1_3290           | carboxylesterase, putative                                                                                                              |    |   |   | 1  |   | 1  | 15.816  |
|            | cgd1_3380           | phosphatidylinositol-glycan-class c, pigC, 8x transmembrane domains                                                                     | 1  |   |   |    |   | 1  | 0.542   |
|            | cgd1_3720           | PIG-M mannosyltransferase,8 transmembrane domain                                                                                        | 1  |   |   |    |   | 1  | 0.353   |
|            | cgd2_1090           | diacylglycerol acyltransferase 1                                                                                                        | 1  |   |   |    |   | 1  | 0.409   |
|            | cgd2_1200           | steroid reductase like integral membrane protein with 4x transmembrane domains and an ubiquitin domain at its N-terminus                | 1  |   |   |    |   | 1  | 0.438   |
|            | cgd2_1340           | possible phosphatidylinositol 3- and 4-kinase family protein                                                                            |    | 1 |   |    |   | 1  | 2.208   |
|            | cgd2_2890           | putative biotin-(acetyl-CoA carboxylase) ligase                                                                                         | 1  |   |   |    |   | 1  | 0.421   |
|            | cgd2_840            | phosphatidylinositol N-acetylglucosaminyltransferase subunit PIG-P, involved in GPI anchor biosynthesis, multitransmembrane domain      |    |   |   | 1  |   | 1  | 7.314   |
|            | cgd3_2030           | putative choline kinase                                                                                                                 | 1  |   |   |    |   | 1  | 0.494   |
|            | cgd3_2100           | phosphatidylserine decarboxylase, putative                                                                                              |    |   |   | 1  |   | 1  | 17.060  |
|            | cgd3_2180           | type I fatty acid synthase                                                                                                              |    | 1 |   |    |   | 1  | 1.573   |
|            | cgd3_2370           | steroid dehydrogenase kik-i, putative                                                                                                   | 1  |   |   |    |   | 1  | 0.512   |
|            | cgd3_2630           | diacylglycerol kinase                                                                                                                   | 1  |   |   |    |   | 1  | 0.404   |
|            | cgd3_2870           | putative acyl-CoA synthetases                                                                                                           | 1  |   |   |    |   | 1  | 0.517   |
|            | cgd3_2940           | probable phosphatidylserine/phosphatidylglycerophosphate/cardiolipin synthase, 2x SMART_PLDc domains, possible bacterial origin         | 1  |   |   |    |   | 1  | 0.473   |
|            | cgd3_320            | N-myristoyltransferase                                                                                                                  | 1  |   |   |    |   | 1  | 0.440   |
|            | cgd3_640            | acyl-CoA synthetase                                                                                                                     |    |   |   | 1  |   | 1  | 15.090  |
|            | cgd4_2100           | PIG-A like N-acetylglucosaminyl-phosphatidylinositol biosynthetic protein                                                               | 1  |   |   |    |   | 1  | 0.413   |
|            | cgd4_2560           | phospholipase C, delta 1 ortholog with 2 EF hands plus phospholipase C domain plus C2 domain                                            |    |   |   | 1  |   | 1  | 9.079   |
|            | cgd4_2580           | oxysterol binding protein 1A-like pleckstrin homology (PH) domain containing protein                                                    | 1  |   |   |    |   | 1  | 0.483   |
|            | cgd4_2590           | glycerophosphodiester phosphodiesterase-like protein                                                                                    | 1  |   |   |    |   | 1  | 0.329   |
|            | cgd4_2790           | putative ethanolaminephosphotransferase (ETHPT) 9 transmembrane domain protein involved in lipid metabolism                             | 1  |   |   |    |   | 1  | 0.561   |
|            | cgd4_2900           | polyketide synthase                                                                                                                     |    |   | 1 |    |   | 1  | 5.536   |
|            | cgd4_3400           | putative long chain fatty acyl CoA synthetase having a signal peptide                                                                   |    |   |   |    | 1 | 1  | 61.470  |
|            | cgd5_1850           | GPI1/PIG-Q like N-acetylglucosaminyl-phosphatidylinositol transferase involved in GIP anchor biosynthesis                               |    |   |   | 1  |   | 1  | 17.338  |
|            | cgd5_2300           | DAD1/Ost2 like dolichyl-diphospho-oligosaccharide-protein glycosyltransferase, epsilon unit                                             |    |   |   | 1  |   | 1  | 8.056   |
|            | cgd5_3070           | acetylcholinesterase'secreted acetylcholinesterase of the alpha/beta hydrolase superfamily'                                             | 1  |   |   |    |   | 1  | 0.423   |
|            | cgd5_320            | carboxylesterase , lysophospholipase, signal peptide                                                                                    |    |   |   | 1  |   | 1  | 10.790  |
|            | cgd5_720            | choline/ethanolamine kinase family protein                                                                                              |    | 1 |   |    |   | 1  | 1.505   |
|            | cgd6_1270           | SCT1/Gpt2p-like glycerol-3-phosphate acyltransferase signal peptide plus 3 transmembrane domain                                         | 1  |   |   |    |   | 1  | 0.509   |
|            | cgd6_2290           | sphingomyelinase C precursor                                                                                                            | 1  |   |   |    |   | 1  | 0.405   |
|            | cgd6_3240           | Gpi16p/PIG-T/SPBC1604.15 family; glycosyl phosphatidyl inositol 16 signal peptide and transmembrane domain or GPI anchor                | 1  |   |   |    |   | 1  | 0.409   |
|            | cgd6_3390           | membrane associated protein with 2 transmembrane domains at the N-terminus and a phosphatidylinositol 4-kinase domain at the C-terminus | 1  |   |   |    |   | 1  | 0.502   |
|            | cgd7_2950           | phospholipid cytidyltransferase HIGH family                                                                                             | 1  |   |   |    |   | 1  | 0.333   |
|            | cgd7_3480           | cytidyltransferase (HIGH family) exon-1                                                                                                 |    |   | 1 |    |   | 1  | 2.680   |
|            | cgd7_450            | putative cytidine diphosphate-diacylglycerol synthase; integral membrane protein with 7 or more transmembrane domains                   |    |   |   |    | 1 | 1  | 29.205  |
|            | cgd7_700            | N-acetylglucosaminyl-phosphatidylinositolde-N-acetylase                                                                                 | 1  |   |   |    |   | 1  | 0.404   |
|            | cgd8_1150           | choline-phosphate cytidyltransferase                                                                                                    |    |   |   |    | 1 | 1  | 185.504 |
|            | cgd8_2260           | phosphatidylinositol glycan class O, integral membrane protein with signal peptide sequence and 12 or more transmembrane domains        | 1  |   |   |    |   | 1  | 0.428   |
|            | cgd8_2390           | diacylglycerol kinase                                                                                                                   | 1  |   |   |    |   | 1  | 0.428   |
|            | cgd8_3280           | phosphatidylinositol-4-phosphate 5-kinase, putative                                                                                     |    |   |   | 1  |   | 1  | 16.919  |
|            | cgd8_4500           | phosphatidylinositol 4-kinase                                                                                                           |    | 1 |   |    |   | 1  | 1.434   |
|            | cgd8_4630           | 7 pass integral membrane proteinwith FLHWFHH motif shared with fatty-acyl elongase                                                      |    |   |   | 1  |   | 1  | 8.236   |
|            | cgd8_560            | CDP-diacylglycerol--inositol 3-phosphatidyltransferase isoform 1; phosphatidylinositol synthase; PtdIns synthase; PI synthase           | 1  |   |   |    |   | 1  | 0.434   |
|            | Lipid Total         |                                                                                                                                         | 25 | 5 | 3 | 10 | 3 | 46 | 9.404   |
| Nucleotide | cgd1_1900           | Fur1p like uracil phosphoribosyltransferase                                                                                             | 1  |   |   |    |   | 1  | 0.531   |
|            | cgd1_3140           | P-loop nucleotide (UMP) kinase                                                                                                          |    |   |   |    | 1 | 1  | 39.507  |
|            | cgd2_1270           | membrane associated adenyl cyclase with 6 transmembrane regions and an adenyl cyclase domain                                            | 1  |   |   |    |   | 1  | 0.436   |
|            | cgd2_1630           | cytidine and deoxycytidylate deaminase family, putative                                                                                 | 1  |   |   |    |   | 1  | 0.371   |
|            | cgd2_2780           | dCMP deaminase, Dcd1p like                                                                                                              | 1  |   |   |    |   | 1  | 0.340   |
|            | cgd3_2320           | cGMP phosphodiesterase A4                                                                                                               |    |   |   | 1  |   | 1  | 7.462   |

|  |                         |                                                                                                              |           |          |          |          |          |           |               |
|--|-------------------------|--------------------------------------------------------------------------------------------------------------|-----------|----------|----------|----------|----------|-----------|---------------|
|  | cgd4_1890               | adenosine monophosphate deaminase 2                                                                          |           |          | 1        |          |          | 1         | 4.073         |
|  | cgd4_4460               | dihydrofolate reductase-thymidylate synthase                                                                 | 1         |          |          |          |          | 1         | 0.369         |
|  | cgd5_1290               | membrane associated adenylyl cyclase with 2 transmembrane regions and an adenylyl cyclase domain             | 1         |          |          |          |          | 1         | 0.555         |
|  | cgd5_1470               | signal peptide containing protein having a NDK (nucleoside-diphosphate kinase) domain                        |           |          |          |          | 1        | 1         | 1,562.515     |
|  | cgd5_1710               | CTP synthetase (UTP-ammonia lyase)                                                                           |           |          |          |          | 1        | 1         | 89.058        |
|  | cgd5_3360               | adenylate kinase (AMP - ADP; dAMP - dADP)                                                                    |           |          |          |          | 1        | 1         | 149.775       |
|  | cgd5_3630               | thymidylate kinase                                                                                           | 1         |          |          |          |          | 1         | 0.419         |
|  | cgd5_4440               | thymidine kinase of likely bacterial origin                                                                  |           | 1        |          |          |          | 1         | 1.411         |
|  | cgd5_4520               | GMP synthase                                                                                                 |           | 1        |          |          |          | 1         | 2.203         |
|  | cgd6_1570               | apyrase; calcium-activated nucleotidase SCAN-1-like protein; signal peptide                                  | 1         |          |          |          |          | 1         | 0.414         |
|  | cgd6_1950               | ribonucleotide-diphosphate reductase large chain; RIR1; c-terminal PFL-like glycol radical enzymes-like fold |           |          | 1        |          |          | 1         | 1.654         |
|  | cgd6_20                 | inosine-5-monophosphate dehydrogenase                                                                        |           |          |          |          | 1        | 1         | 51.213        |
|  | cgd6_500                | membrane associated HD superfamily cyclic nucleotide phosphodiesterase domain containing protein             | 1         |          |          |          |          | 1         | 0.413         |
|  | cgd6_690                | ribonucleotide reductase small subunit, duplicated adjacent gene                                             | 1         |          |          |          |          | 1         | 0.503         |
|  | cgd6_700                | ribonucleotide reductase small subunit                                                                       |           |          | 1        |          |          | 1         | 3.098         |
|  | cgd7_2190               | putative guanylate kinase                                                                                    |           | 1        |          |          |          | 1         | 2.072         |
|  | cgd7_5170               | deoxyuridinetriphosphatase, possible bacterial origin                                                        |           |          |          |          | 1        | 1         | 170.965       |
|  | cgd8_2370               | adenosine kinase like ribokinase (Adenosine - AMP)                                                           |           | 1        |          |          |          | 1         | 2.053         |
|  | cgd8_2810               | uridine kinase like P-loop NTPase                                                                            | 1         |          |          |          |          | 1         | 0.368         |
|  | <b>Nucleotide Total</b> |                                                                                                              | <b>11</b> | <b>5</b> | <b>2</b> | <b>1</b> | <b>6</b> | <b>25</b> | <b>83.671</b> |
|  | <b>Peptidase</b>        |                                                                                                              |           |          |          |          |          |           |               |
|  | cgd1_1680               | insulinase like protease, signal peptide                                                                     | 1         |          |          |          |          | 1         | 0.588         |
|  | cgd1_3690               | aspartyl (acid) protease, putative                                                                           |           | 1        |          |          |          | 1         | 2.119         |
|  | cgd1_370                | carboxypeptidase probably secreted, signal peptide                                                           | 1         |          |          |          |          | 1         | 0.391         |
|  | cgd1_3840               | insulinase-like peptidase, telomeric gene                                                                    |           |          | 1        |          |          | 1         | 3.519         |
|  | cgd2_2480               | methionine aminopeptidase, type II, putative , an1 domain                                                    |           |          |          |          | 1        | 1         | 21.559        |
|  | cgd2_2760               | peptidase'insulinase-like peptidase'                                                                         | 1         |          |          |          |          | 1         | 0.422         |
|  | cgd2_3320               | secreted papain like protease, signal peptide                                                                | 1         |          |          |          |          | 1         | 0.518         |
|  | cgd2_4270               | secreted insulinase-like peptidase                                                                           |           |          | 1        |          |          | 1         | 2.496         |
|  | cgd2_710                | predicted protease                                                                                           | 1         |          |          |          |          | 1         | 0.508         |
|  | cgd2_920                | peptidase'insulinase-like peptidase'                                                                         | 1         |          |          |          |          | 1         | 0.507         |
|  | cgd2_930                | peptidase'insulinase-like peptidase'                                                                         | 1         |          |          |          |          | 1         | 0.447         |
|  | cgd3_2160               | SprT like metalloprotease                                                                                    | 1         |          |          |          |          | 1         | 0.491         |
|  | cgd3_2390               | proliferation-associated protein 2G4 metalloprotease, creatinase/aminopeptidase fold                         |           |          |          |          | 1        | 1         | 8.596         |
|  | cgd3_2920               | possible peptidase family C54                                                                                | 1         |          |          |          |          | 1         | 0.314         |
|  | cgd3_3610               | possible aspartyl aminopeptidase                                                                             | 1         |          |          |          |          | 1         | 0.342         |
|  | cgd3_4180               | secreted insulinase like peptidase                                                                           |           |          |          |          | 1        | 1         | 11.207        |
|  | cgd3_4190               | secreted insulinase like peptidase                                                                           |           |          |          |          | 1        | 1         | 99.822        |
|  | cgd3_4200               | secreted insulinase like peptidase, signal peptide                                                           |           | 1        |          |          |          | 1         | 2.078         |
|  | cgd3_4210               | secreted insulinase like peptidase, signal peptide                                                           |           | 1        |          |          |          | 1         | 1.548         |
|  | cgd3_4220               | secreted insulinase like peptidase, signal peptide                                                           |           |          |          |          | 1        | 1         | 32.433        |
|  | cgd3_4240               | insulinase like peptidase                                                                                    |           |          | 1        |          |          | 1         | 2.850         |
|  | cgd3_4250               | secreted insulinase like peptidase, signal peptide                                                           |           |          |          |          | 1        | 1         | 14.086        |
|  | cgd3_4260               | peptidase'insulinase like peptidase'                                                                         |           |          |          |          | 1        | 1         | 25.027        |
|  | cgd3_4270               | peptidase'insulinase like peptidase'                                                                         |           |          |          |          | 1        | 1         | 18.424        |
|  | cgd3_4280               | secreted insulinase like peptidase, signal peptide                                                           |           | 1        |          |          |          | 1         | 3.100         |
|  | cgd3_680                | cathepsin like thiol protease possibly membrane associated, putative                                         |           | 1        |          |          |          | 1         | 4.611         |
|  | cgd4_2110               | preprocathepsin c precursor, putative                                                                        |           |          | 1        |          |          | 1         | 4.293         |
|  | cgd4_2190               | membrane associated aspartyl protease with a transmembrane domain at the C-terminus                          | 1         |          |          |          |          | 1         | 0.390         |
|  | cgd4_2910               | aminopeptidase                                                                                               |           |          | 1        |          |          | 1         | 3.058         |
|  | cgd4_4120               | metacaspase-like protein                                                                                     | 1         |          |          |          |          | 1         | 0.586         |
|  | cgd4_4160               | possible carboxypeptidase                                                                                    | 1         |          |          |          |          | 1         | 0.322         |
|  | cgd4_4240               | insulinase like peptidase                                                                                    |           |          | 1        |          |          | 1         | 4.114         |
|  | cgd4_4430               | OTU like cysteine protease                                                                                   |           |          |          |          | 1        | 1         | 6.117         |
|  | cgd5_2810               | ULP1 like chllamydin domain containing protease                                                              |           |          |          |          | 1        | 1         | 6.714         |
|  | cgd6_2750               | cysteine protease, putative                                                                                  |           |          |          |          | 1        | 1         | 19.932        |
|  | cgd6_3550               | endopeptidase, putative                                                                                      |           | 1        |          |          |          | 1         | 1.348         |
|  | cgd6_3820               | membrane bound aspartyl proteinase with a signal peptide plus transmembrane domain                           |           | 1        |          |          |          | 1         | 1.784         |
|  | cgd6_4880               | cryptopain - cysteine proteinase secreted, possible transmembrane domain near N-terminus                     | 1         |          |          |          |          | 1         | 0.538         |
|  | cgd6_4990               | predicted peptidase of the alpha/beta-hydrolase fold                                                         |           | 1        |          |          |          | 1         | 1.502         |
|  | cgd6_5510               | telomeric insulinase-like protease with signal peptide                                                       | 1         |          |          |          |          | 1         | 0.260         |
|  | cgd6_5520               | peptidase'insulinase like peptidase'                                                                         | 1         |          |          |          |          | 1         | 0.301         |
|  | cgd6_660                | secreted pepsinogen like aspartyl protease having a signal peptide                                           | 1         |          |          |          |          | 1         | 0.491         |
|  | cgd6_900                | SPAC25H1.04/CG16979-cterm -like; cysteine protease                                                           | 1         |          |          |          |          | 1         | 0.304         |
|  | cgd7_140                | SprT family metallopeptidase                                                                                 |           |          | 1        |          |          | 1         | 2.677         |
|  | cgd7_2850               | cathepsin like thiol protease possibly membrane associated                                                   |           | 1        |          |          |          | 1         | 1.401         |
|  | cgd7_3020               | rhomboid family membrane associated protease, 7 transmembrane domain                                         |           |          |          |          | 1        | 1         | 169.568       |

|                       |           |                                                                                                                                              |    |   |   |    |   |    |         |
|-----------------------|-----------|----------------------------------------------------------------------------------------------------------------------------------------------|----|---|---|----|---|----|---------|
|                       | cgd8_2720 | insulinase like metalloprotease                                                                                                              | 1  |   |   |    |   | 1  | 0.389   |
|                       | cgd8_3430 | zincin/aminopeptidase N like metalloprotease                                                                                                 |    |   |   | 1  |   | 1  | 9.086   |
| Peptidase Total       |           |                                                                                                                                              | 19 | 7 | 9 | 10 | 3 | 48 | 10.275  |
| Protein folding       |           |                                                                                                                                              | 1  |   |   |    |   | 1  | 0.331   |
|                       | cgd1_800  | protein disulfide isomerase, signal peptide plus possible ER retention motif                                                                 | 1  |   |   |    |   | 1  | 0.331   |
|                       | cgd1_870  | cyclophilin like peptidyl-prolyl cis-trans isomerase, signal peptide                                                                         |    |   |   |    | 1 | 1  | 42.272  |
|                       | cgd2_1660 | cyclophilin-like protein, putative                                                                                                           | 1  |   |   |    |   | 1  | 0.322   |
|                       | cgd2_4120 | 20k cyclophilin, putative                                                                                                                    |    | 1 |   |    |   | 1  | 1.479   |
|                       | cgd6_120  | disulfide-isomerase, signal peptide plus ER retention motif, putative ER protein                                                             |    | 1 |   |    |   | 1  | 1.550   |
|                       | cgd6_2690 | macrophage infectivity potentiator (MIP);FKBP peptidyl-prolyl cis-trans isomerase-like fold, signal peptide + ER retention motif             |    | 1 |   |    |   | 1  | 1.525   |
|                       | cgd6_3640 | protein disulfide isomerase ; secreted protein with thioredoxin, signal peptide plus ER retention motif                                      | 1  |   |   |    |   | 1  | 0.357   |
|                       | cgd7_210  | fkbp                                                                                                                                         |    |   |   |    | 1 | 1  | 146.099 |
|                       | cgd7_5100 | protein disulfide isomerase, signal peptide plus ER retention motif                                                                          |    |   |   |    | 1 | 1  | 31.408  |
|                       | cgd8_2350 | cyclophilin-RNA interacting protein, putative                                                                                                |    | 1 |   |    |   | 1  | 1.679   |
| Protein folding Total |           |                                                                                                                                              | 3  | 4 |   |    | 3 | 10 | 22.702  |
| Protein kinase        |           |                                                                                                                                              |    | 1 |   |    |   | 1  | 1.795   |
|                       | cgd1_1220 | S/T protein kinase                                                                                                                           |    | 1 |   |    |   | 1  | 1.795   |
|                       | cgd1_2630 | Ser/Thr protein kinase                                                                                                                       | 1  |   |   |    |   | 1  | 0.491   |
|                       | cgd1_2850 | protein kinase domain                                                                                                                        |    | 1 |   |    |   | 1  | 2.000   |
|                       | cgd1_810  | protein kinase                                                                                                                               | 1  |   |   |    |   | 1  | 0.640   |
|                       | cgd1_890  | protein kinase domain                                                                                                                        |    |   |   | 1  |   | 1  | 7.703   |
|                       | cgd2_1060 | calcium/calmodulin dependent protein kinase with a kinase domain and 4 calmodulin-like EF hands                                              |    |   |   |    | 1 | 1  | 32.747  |
|                       | cgd2_1300 | calcium/calmodulin dependent protein kinase with a kinase domain and 4 calmodulin like EF hands                                              |    | 1 |   |    |   | 1  | 1.934   |
|                       | cgd2_1880 | protein kinase, putative                                                                                                                     |    | 1 |   |    |   | 1  | 2.191   |
|                       | cgd2_1960 | mitogen-activated protein kinase 1, serine/threonine protein kinase, putative                                                                |    |   | 1 |    |   | 1  | 4.731   |
|                       | cgd2_3190 | protein kinase, putative                                                                                                                     | 1  |   |   |    |   | 1  | 0.445   |
|                       | cgd2_3340 | Ser/Thr protein kinase                                                                                                                       |    | 1 |   |    |   | 1  | 1.447   |
|                       | cgd2_3660 | serine protease, subtilase family, signal peptide, putative                                                                                  | 1  |   |   |    |   | 1  | 0.409   |
|                       | cgd2_3890 | Ser/Thr protein kinase                                                                                                                       | 1  |   |   |    |   | 1  | 0.334   |
|                       | cgd2_4340 | mitogen-activated protein kinase 2, putative                                                                                                 |    |   | 1 |    |   | 1  | 3.086   |
|                       | cgd3_1810 | casein kinase I                                                                                                                              |    |   | 1 |    |   | 1  | 5.040   |
|                       | cgd3_1850 | putative casein kinase II regulatory subunit; besthit Pf 23508244                                                                            |    |   |   |    | 1 | 1  | 39.442  |
|                       | cgd3_2900 | protein Roco7, putative                                                                                                                      | 1  |   |   |    |   | 1  | 0.346   |
|                       | cgd3_3030 | MAPK, putative [Mitogen-activated protein kinase]                                                                                            | 1  |   |   |    |   | 1  | 0.429   |
|                       | cgd3_3040 | protein kinase, cAMP-dependent, catalytic chain                                                                                              |    |   |   |    | 1 | 1  | 27.906  |
|                       | cgd3_3180 | Ser/Thr protein kinase                                                                                                                       |    | 1 |   |    |   | 1  | 1.779   |
|                       | cgd3_3230 | Ser/Thr protein kinase                                                                                                                       |    |   |   | 1  |   | 1  | 6.811   |
|                       | cgd3_3670 | putative protein kinase CK2 regulatory subunit CK2B1                                                                                         |    |   |   | 1  |   | 1  | 6.865   |
|                       | cgd3_40   | casein kinase I                                                                                                                              | 1  |   |   |    |   | 1  | 0.478   |
|                       | cgd3_920  | calmodulin-domain protein kinase 1, putative                                                                                                 |    |   |   |    | 1 | 1  | 25.137  |
|                       | cgd4_290  | putative protein phosphatase 2A regulatory B subunit                                                                                         |    |   |   | 1  |   | 1  | 5.922   |
|                       | cgd4_3710 | Ser/Thr protein kinase                                                                                                                       | 1  |   |   |    |   | 1  | 0.426   |
|                       | cgd4_990  | Ser/Thr protein kinase                                                                                                                       | 1  |   |   |    |   | 1  | 0.318   |
|                       | cgd5_2270 | maternal embryonic leucine zipper kinase                                                                                                     |    |   |   |    | 1 | 1  | 131.074 |
|                       | cgd5_250  | serine/threonine kinase-1                                                                                                                    |    |   |   | 1  |   | 1  | 12.575  |
|                       | cgd5_3180 | Ser/Thr protein kinase                                                                                                                       | 1  |   |   |    |   | 1  | 0.338   |
|                       | cgd5_4390 | Ser/Thr protein kinase                                                                                                                       | 1  |   |   |    |   | 1  | 0.318   |
|                       | cgd5_820  | calcium/calmodulin dependent protein kinase with a kinase domain and 4 calmodulin like EF hands                                              |    |   | 1 |    |   | 1  | 4.439   |
|                       | cgd6_3400 | protein kinase                                                                                                                               |    |   | 1 |    |   | 1  | 3.867   |
|                       | cgd6_4840 | serine protease, subtilase family, signal peptide                                                                                            | 1  |   |   |    |   | 1  | 0.481   |
|                       | cgd6_4960 | serine/threonine-protein kinase, putative                                                                                                    |    | 1 |   |    |   | 1  | 1.809   |
|                       | cgd6_5060 | Ser/Thr protein kinase                                                                                                                       |    |   | 1 |    |   | 1  | 2.548   |
|                       | cgd6_520  | Ser/Thr protein kinase                                                                                                                       |    |   | 1 |    |   | 1  | 5.318   |
|                       | cgd6_5240 | protein kinase                                                                                                                               | 1  |   |   |    |   | 1  | 0.634   |
|                       | cgd6_620  | casein kinase II, alpha subunit, putative                                                                                                    |    |   |   |    | 1 | 1  | 74.113  |
|                       | cgd7_1190 | Ser/Thr protein kinase                                                                                                                       |    |   |   |    | 1 | 1  | 33.549  |
|                       | cgd7_120  | cAMP-dependent protein kinase regulatory subunit                                                                                             |    |   |   |    | 1 | 1  | 50.411  |
|                       | cgd7_1260 | calcium/calmodulin dependent protein kinase with an EF hand N-terminal to the kinase domain and 4 calmodulin like EF hands at the C-terminus | 1  |   |   |    |   | 1  | 0.441   |
|                       | cgd7_1320 | casein kinase II, alpha subunit, putative                                                                                                    |    |   | 1 |    |   | 1  | 2.430   |
|                       | cgd7_1330 | protein kinase with possible transmembrane region near N-terminus                                                                            | 1  |   |   |    | 1 | 2  | 22.162  |
|                       | cgd7_1840 | calcium/calmodulin-dependent protein kinase with a kinase domain and 4 calmodulin like EF hands                                              |    |   |   | 1  |   | 1  | 7.214   |
|                       | cgd7_2000 | Bub1p related protein kinase                                                                                                                 | 1  |   |   |    |   | 1  | 0.379   |
|                       | cgd7_2670 | serine/threonine protein phosphatase, putative                                                                                               |    |   |   |    | 1 | 1  | 173.545 |
|                       | cgd7_3050 | protein kinase                                                                                                                               |    |   | 1 |    |   | 1  | 3.350   |
|                       | cgd7_3430 | protein kinase                                                                                                                               |    |   |   |    | 1 | 1  | 49.044  |
|                       | cgd7_3890 | calcium-dependent protein kinase 7 (CDPK)(CPK7)                                                                                              | 1  |   |   |    |   | 1  | 0.280   |



|                                |                                   |                                                                                                                                  |           |          |           |          |           |           |               |
|--------------------------------|-----------------------------------|----------------------------------------------------------------------------------------------------------------------------------|-----------|----------|-----------|----------|-----------|-----------|---------------|
|                                | cgd7_40                           | calcium/calmodulin-dependent protein kinase with a kinase domain and 2 calmodulin-like EF hands                                  | 1         |          |           |          |           | 1         | 0.525         |
|                                | cgd7_440                          | RIO-like kinase domain; N-terminal region conserved                                                                              |           |          |           |          | 1         | 1         | 126.665       |
|                                | cgd7_590                          | Ser/Thr protein kinase                                                                                                           | 1         |          |           |          |           | 1         | 0.386         |
|                                | cgd8_1230                         | proteine kinase                                                                                                                  | 1         |          |           |          |           | 1         | 0.354         |
|                                | cgd8_1660                         | protein kinase                                                                                                                   |           | 1        |           |          |           | 1         | 2.308         |
|                                | cgd8_2430                         | Ser/Thr protein kinase with MORN repeats at the N-terminus and a sterile alpha motif (SAM_ domain                                | 1         |          |           |          |           | 1         | 0.381         |
|                                | cgd8_3070                         | serine/threonine protein kinase KKIALRE                                                                                          |           |          | 1         |          |           | 1         | 3.836         |
|                                | cgd8_5120                         | protein kinase NPK2                                                                                                              | 1         |          |           |          |           | 1         | 0.349         |
|                                | cgd8_5320                         | Ser/Thr protein kinase                                                                                                           |           |          |           | 1        |           | 1         | 7.371         |
|                                | cgd8_750                          | cyclic nucleotide (cGMP)-dependent protein kinase with 3 cNMP binding domains and a Ser/Thr kinase domain                        | 1         |          |           |          |           | 1         | 0.389         |
|                                | <b>Protein kinase Total</b>       |                                                                                                                                  | <b>24</b> | <b>8</b> | <b>10</b> | <b>7</b> | <b>12</b> | <b>61</b> | <b>15.179</b> |
| <b>Protein modification</b>    | cgd1_1980                         | protein geranyl-geranyltransferase beta subunit                                                                                  |           |          |           | 1        |           | 1         | 4.136         |
|                                | cgd1_2660                         | n-terminal acetyltransferase complex ard1                                                                                        |           |          |           | 1        |           | 1         | 3.864         |
|                                | cgd1_730                          | glutamine cyclotransferase, predicted bacterial/plant origin                                                                     | 1         |          |           |          |           | 1         | 0.399         |
|                                | cgd1_820                          | DHHC family palmitoyl transferases with 4 transmembrane domains                                                                  | 1         |          |           |          |           | 1         | 0.368         |
|                                | cgd2_1460                         | SUMO-1 activating enzyme subunit 2, putative                                                                                     | 1         |          |           |          |           | 1         | 0.373         |
|                                | cgd2_2190                         | DHHC family palmitoyl transferase fused to a KOW domain, signal peptide                                                          |           |          |           | 1        |           | 1         | 6.329         |
|                                | cgd2_30                           | cysteine desulfurase/selenocysteine lyase-like PLP dependent transferase superfamily protein                                     |           |          |           | 1        |           | 1         | 4.312         |
|                                | cgd3_2350                         | possible RAB geranylgeranyl transferase, b subunit1, pernyltransferase (prenyltransferase)                                       |           |          |           | 1        |           | 1         | 4.366         |
|                                | cgd3_4310                         | sexual stage-specific protein kinase                                                                                             |           | 1        |           |          |           | 1         | 1.666         |
|                                | cgd4_2080                         | DHHC family palmitoyl transferase with 4 transmembrane regions                                                                   | 1         |          |           |          |           | 1         | 0.439         |
|                                | cgd5_3770                         | putative arginine N-methyltransferase                                                                                            |           |          |           |          | 1         | 1         | 34.651        |
|                                | cgd5_430                          | 70 kDa peptidylprolyl isomerase, putative                                                                                        | 1         |          |           |          |           | 1         | 0.555         |
|                                | cgd6_2510                         | farnesyltransferase                                                                                                              | 1         |          |           |          |           | 1         | 0.352         |
|                                | cgd7_1560                         | DHHC family palmitoyl transferase with a signal peptide and 4 transmembrane domains                                              |           | 1        |           |          |           | 1         | 1.961         |
|                                | cgd8_1490                         | bacterial type serine/tyrosine phosphatase                                                                                       |           |          |           | 1        |           | 1         | 13.749        |
|                                | cgd8_2010                         | span like RimI family protein amino acetyltransferase                                                                            |           | 1        |           |          |           | 1         | 1.395         |
|                                | cgd8_4730                         | DHHC family palmitoyl transferase with a signal peptide and 4 transmembrane domains                                              |           | 1        |           |          |           | 1         | 1.486         |
|                                | cgd8_4760                         | arginine n-methyltransferase                                                                                                     |           |          |           |          | 1         | 1         | 29.544        |
|                                | <b>Protein modification Total</b> |                                                                                                                                  | <b>6</b>  | <b>4</b> | <b>4</b>  | <b>2</b> | <b>2</b>  | <b>18</b> | <b>6.108</b>  |
| <b>Protein phosphatase</b>     | cgd1_2120                         | protein phosphatase regulator like heat repeats                                                                                  |           | 1        |           |          |           | 1         | 1.665         |
|                                | cgd1_2360                         | protein phosphatase 4 (formerly X), catalytic subunit; Protein phosphatase 4, catalytic subunit                                  |           |          |           |          | 1         | 1         | 53.151        |
|                                | cgd1_2470                         | phosphotyrosyl phosphatase activator protein-related                                                                             | 1         |          |           |          |           | 1         | 0.443         |
|                                | cgd1_760                          | dual specificity phosphatase                                                                                                     |           |          |           |          | 1         | 1         | 86.436        |
|                                | cgd2_1640                         | calcineurin like phosphatase with 3x Efhand domains at N-terminus                                                                | 1         |          |           |          |           | 1         | 0.441         |
|                                | cgd2_2960                         | phosphoprotein phosphatase related, putative                                                                                     |           |          |           | 1        |           | 1         | 5.836         |
|                                | cgd2_640                          | possible conserved acid phosphatase                                                                                              |           | 1        |           |          |           | 1         | 1.981         |
|                                | cgd3_1470                         | dual specificity phosphatase                                                                                                     | 1         |          |           |          |           | 1         | 0.423         |
|                                | cgd3_1890                         | membrane bound phosphatase with 3 transmembrane domains and a dual specificity phosphatase                                       | 1         |          |           |          |           | 1         | 0.486         |
|                                | cgd3_2020                         | PP2C like protein phosphatase                                                                                                    | 1         |          |           |          |           | 1         | 0.430         |
|                                | cgd3_2150                         | protein phosphatase, signal peptide, 2-6 transmembrane domain protein                                                            | 1         |          |           |          |           | 1         | 0.366         |
|                                | cgd3_250                          | protein serine/threonine phosphatase alpha                                                                                       | 1         |          |           |          |           | 1         | 0.464         |
|                                | cgd6_1010                         | PP2C like protein phosphatase                                                                                                    | 1         |          |           |          |           | 1         | 0.503         |
|                                | cgd6_3570                         | myotubularin related protein 1, C-terminus protein                                                                               | 1         |          |           |          |           | 1         | 0.442         |
|                                | cgd6_4200                         | tyrosine/serine phosphatase, catalytic domain protein phosphatase 2B catalytic subunit, calcineurin like phosphatase superfamily |           | 1        |           |          |           | 1         | 2.359         |
|                                | cgd6_440                          | PP2Cc like protein phosphatase                                                                                                   | 1         |          |           |          |           | 1         | 0.326         |
|                                | cgd6_5000                         | phosphoprotein phosphatase 2A 65K regulatory chain-like with HEAT repeats                                                        |           |          |           |          | 1         | 1         | 56.488        |
|                                | cgd7_3530                         | PP2C-like phosphatase                                                                                                            | 1         |          |           |          |           | 1         | 0.473         |
|                                | cgd7_4150                         | PP2C phosphatase                                                                                                                 |           | 1        |           |          |           | 1         | 2.050         |
|                                | cgd7_4640                         | PP2C phosphatase                                                                                                                 |           |          |           |          | 1         | 1         | 248.430       |
|                                | cgd7_4790                         | Ptc7p phosphatase (PP2C family)                                                                                                  |           |          |           |          | 1         | 1         | 333.117       |
|                                | cgd7_4970                         | protein phosphatase 2A regulatory subunit (contains a conserved version of EF hands)                                             |           | 1        |           |          |           | 1         | 1.630         |
|                                | cgd7_810                          | protein phosphatase PP2A, calcineurin like phosphoesterase superfamily                                                           | 1         |          |           |          |           | 1         | 0.453         |
|                                | cgd8_1430                         | PP2C like protein phosphatase                                                                                                    |           |          |           | 1        |           | 1         | 2.709         |
|                                | cgd8_290                          | serine-threonine protein phosphatase                                                                                             | 1         |          |           |          |           | 1         | 0.432         |
|                                | cgd8_3180                         | protein phosphatase regulator like HEAT repeats containing protein that folds into a alpha-alpha superhelix                      |           |          |           | 1        |           | 1         | 2.474         |
|                                | <b>Protein phosphatase Total</b>  |                                                                                                                                  | <b>13</b> | <b>5</b> | <b>3</b>  |          | <b>5</b>  | <b>26</b> | <b>30.923</b> |
| <b>Sugar &amp; derivatives</b> | cgd1_3060                         | oligosaccharide deacetylase domain                                                                                               | 1         |          |           |          |           | 1         | 0.552         |
|                                | cgd2_1770                         | mannose-1-phosphate guanylyltransferase                                                                                          | 1         |          |           |          |           | 1         | 0.534         |
|                                | cgd2_1900                         | dTDP-glucose 4-6-dehydratase-like protein, putative                                                                              |           | 1        |           |          |           | 1         | 1.749         |
|                                | cgd4_2600                         | UDP-glucose 4-epimerase                                                                                                          |           |          | 1         |          |           | 1         | 2.593         |

|                        |                      |                           |                                                                                                                                   |     |    |    |    |    |     |         |
|------------------------|----------------------|---------------------------|-----------------------------------------------------------------------------------------------------------------------------------|-----|----|----|----|----|-----|---------|
|                        |                      | cgd4_810                  | UDP-N-acetylglucosamine pyrophosphorylase                                                                                         | 1   |    |    |    |    | 1   | 0.395   |
|                        |                      | cgd4_960                  | phosphomannomutase                                                                                                                | 1   |    |    |    |    | 1   | 0.323   |
|                        |                      | cgd6_3750                 | 1,4-alpha-glucan branching enzyme; alpha-amylase; glycogen branching enzyme                                                       | 1   |    |    |    |    | 1   | 0.537   |
|                        |                      | cgd7_1830                 | secreted UDP-N-acetylglucosamine pyrophosphorylase family protein, signal peptide                                                 | 1   |    |    |    |    | 1   | 0.471   |
|                        |                      | cgd7_2580                 | AMSJ/WSAK like polysaccharide polymerase (glycosyltransferase family)                                                             | 1   |    |    |    |    | 1   | 0.548   |
|                        |                      | cgd7_4120                 | UDP-N-acetylgalactosamine: polypeptide N-acetylgalactosaminyltransferase, signal peptide                                          | 1   |    |    |    |    | 1   | 0.509   |
|                        |                      | cgd8_4940                 | trehalose-6-phosphate synthase of likely plant origin                                                                             | 1   |    |    |    |    | 1   | 0.515   |
|                        |                      | cgd8_920                  | UDP-glucose 6-dehydrogenase                                                                                                       | 1   |    |    |    |    | 1   | 0.338   |
|                        |                      | Sugar & derivatives Total |                                                                                                                                   | 10  | 1  | 1  |    |    | 12  | 0.755   |
| <b>Enzyme Total</b>    |                      |                           |                                                                                                                                   | 170 | 60 | 50 | 62 | 47 | 389 | 25.786  |
| <b>Gene expression</b> | <b>RNA synthesis</b> | cgd1_1620                 | RPB7 like OB fold RNA polymerase subunit                                                                                          |     |    |    | 1  |    | 1   | 3.826   |
|                        |                      | cgd1_1960                 | RPB7 subunit of the RNA polymerase III, OB fold                                                                                   | 1   |    |    |    |    | 1   | 0.379   |
|                        |                      | cgd1_2260                 | RNA polymerase II B8 subunit                                                                                                      |     | 1  |    |    |    | 1   | 1.944   |
|                        |                      | cgd1_2710                 | RNA polymerase II B3 subunit                                                                                                      |     |    | 1  |    |    | 1   | 2.583   |
|                        |                      | cgd1_2770                 | RNA polymerase 1 beta subunit                                                                                                     |     |    |    |    | 1  | 1   | 114.168 |
|                        |                      | cgd2_2970                 | DNA-directed RNA polymerase II, putative                                                                                          |     |    |    | 1  |    | 1   | 20.205  |
|                        |                      | cgd2_730                  | RNA polymerase III transcription factor (TF)IIIC subunit tau/Tfc1p                                                                | 1   | 1  |    |    |    | 2   | 1.766   |
|                        |                      | cgd2_980                  | putative DNA-directed RNA polymerase 2                                                                                            |     |    |    | 1  |    | 1   | 21.906  |
|                        |                      | cgd2_990                  | queuine tRNA-guanine transglycosylase                                                                                             |     |    |    |    | 1  | 1   | 36.009  |
|                        |                      | cgd3_1870                 | DNA-directed RNA polymerase 2 subunit                                                                                             |     | 1  |    |    |    | 1   | 1.560   |
|                        |                      | cgd3_2620                 | putative DNA-directed RNA polymerase, possible RNA polymerase A/beta'/A" subunit, long PHYSPTS repeat at C-terminus               |     |    |    |    | 1  | 1   | 28.707  |
|                        |                      | cgd4_3260                 | putative DNA-directed RNA polymerases I, II, and III 8.3 kda polypeptide                                                          |     |    |    | 1  |    | 1   | 17.908  |
|                        |                      | cgd5_730                  | DNA-directed RNA polymerase I, putative                                                                                           |     |    |    | 1  |    | 1   | 5.562   |
|                        |                      | cgd6_3290                 | DNA-directed RNA polymerase III C1 subunit                                                                                        |     |    | 1  |    |    | 1   | 4.484   |
|                        |                      | cgd6_4580                 | RNA polymerase III C34 subunit; rpc34p ortholog                                                                                   |     |    |    | 1  |    | 1   | 16.501  |
|                        |                      | cgd7_3720                 | RNA polymerase beta subunit                                                                                                       |     |    | 1  |    |    | 1   | 3.276   |
|                        |                      | cgd7_4250                 | RNA pol II carboxy terminal domain phosphatase of the HAD superfamily with a BRCT domain at the C-terminus                        |     |    |    | 1  |    | 1   | 18.369  |
|                        |                      | cgd7_4370                 | RNA polymerase II, putative                                                                                                       |     | 1  |    |    |    | 1   | 1.250   |
|                        |                      | cgd7_4390                 | NudC ortholog                                                                                                                     |     | 1  |    |    |    | 1   | 1.897   |
|                        |                      | cgd7_4770                 | DNA-directed RNA polymerase subunit                                                                                               |     |    |    |    | 1  | 1   | 72.834  |
|                        |                      | cgd7_510                  | RNA polymerase III subunit C11                                                                                                    |     | 1  |    |    |    | 1   | 1.950   |
|                        |                      | cgd8_170                  | DNA-directed RNA polymerase beta subunit                                                                                          |     |    | 1  |    |    | 1   | 5.245   |
|                        |                      | cgd8_300                  | RNA polymerase III C5 subunit                                                                                                     |     |    |    |    | 1  | 1   | 82.368  |
|                        |                      | cgd8_3400                 | RNA polymerase II CTD/NL1 interacting protein like phosphatase                                                                    | 1   |    |    |    |    | 1   | 0.469   |
|                        |                      | cgd8_4810                 | RNA pol II carboxy terminal domain phosphatase of the HAD superfamily with a BRCT domain at the C-terminus                        | 1   |    |    |    |    | 1   | 0.348   |
|                        |                      | RNA synthesis Total       |                                                                                                                                   | 4   | 6  | 5  | 6  | 5  | 26  | 17.972  |
|                        | <b>Transcription</b> | cgd1_1560                 | domain KOG2577, transcription factor E2F/dimerization partner (TDP)                                                               |     |    |    |    | 1  | 1   | 81.378  |
|                        |                      | cgd1_1570                 | transcription factor E2F                                                                                                          |     |    |    |    | 1  | 1   | 111.751 |
|                        |                      | cgd1_1700                 | GATA type DNA binding domain fused to an AT hook                                                                                  |     | 1  |    |    |    | 1   | 2.221   |
|                        |                      | cgd1_2450                 | ELP3 like acetyltransferase involved in transcription                                                                             |     |    |    |    | 1  | 1   | 30.452  |
|                        |                      | cgd1_2600                 | transcription factor TAF5p, TBP associated protein involved in transcription                                                      | 1   |    |    |    |    | 1   | 0.486   |
|                        |                      | cgd1_3620                 | transcription factor TAF7p/TAFII55                                                                                                |     |    | 1  |    |    | 1   | 3.834   |
|                        |                      | cgd1_3780                 | domain KOG1015, transcription regulator XNP/ATRX, DEAD-box superfamily, signal peptide                                            |     |    | 1  |    |    | 1   | 3.057   |
|                        |                      | cgd2_1760                 | gata/ArfGAP, putative                                                                                                             |     |    | 1  |    |    | 1   | 3.512   |
|                        |                      | cgd2_2060                 | possible transcription factor TFIIH                                                                                               |     |    | 1  |    |    | 1   | 3.906   |
|                        |                      | cgd2_220                  | transcription factor TFIIIF                                                                                                       |     | 1  |    |    |    | 1   | 2.172   |
|                        |                      | cgd2_2820                 | transcription factor, putative                                                                                                    |     |    | 1  |    |    | 1   | 2.405   |
|                        |                      | cgd2_3420                 | programmed cell death 2, putative                                                                                                 |     |    |    |    | 1  | 1   | 9.343   |
|                        |                      | cgd3_1120                 | SNAPc like transcription factor with 4 MYB/SANT domains                                                                           |     |    |    |    | 1  | 1   | 6.242   |
|                        |                      | cgd3_3110                 | transcription factor TFIIH with a vWA domain                                                                                      | 1   |    |    |    |    | 1   | 0.454   |
|                        |                      | cgd3_3250                 | CCAAT-binding factor (CBF)/MAK21 family protein                                                                                   |     |    |    | 1  |    | 1   | 11.631  |
|                        |                      | cgd3_3750                 | multiprotein bridging factor type 1 like transcriptional co-activator                                                             |     |    | 1  |    |    | 1   | 2.464   |
|                        |                      | cgd3_4060                 | histone transcription regulator (HIR1)-like WD40 repeat protein                                                                   |     | 1  |    |    |    | 1   | 1.489   |
|                        |                      | cgd3_4150                 | cutinase negative acting protein, putative                                                                                        |     |    |    |    | 1  | 1   | 315.246 |
|                        |                      | cgd3_760                  | HMG-like nuclear protein, Nhp2p, pelota RNA binding domain containing protein                                                     |     |    |    |    | 1  | 1   | 105.529 |
|                        |                      | cgd4_1270                 | transcription factor TFIIIB, SANT domain                                                                                          |     |    | 1  |    |    | 1   | 3.689   |
|                        |                      | cgd4_1590                 | chromodomain-helicase-DNA-binding/multidomain chromatin protein with the following architecture: chromo-bromo-chromo-SNF2 ATPase' |     |    | 1  |    |    | 1   | 1.472   |
|                        |                      | cgd4_1720                 | CCAAT-box DNA binding protein subunit B                                                                                           |     |    | 1  |    |    | 1   | 1.824   |
|                        |                      | cgd4_310                  | CCAAT-binding factor chain HAP5 like histone                                                                                      | 1   |    |    |    |    | 2   | 0.345   |
|                        |                      | cgd4_3810                 | putative transcription factor IIE alpha subunit                                                                                   | 1   | 1  |    |    |    | 1   | 1.123   |
|                        |                      | cgd4_710                  | Ynr054cp, basal transcriptional activator hABT1, RRM domain containing protein                                                    |     |    |    | 1  |    | 1   | 5.676   |

|  |                     |                                                                                                                                   |   |   |    |   |    |    |         |
|--|---------------------|-----------------------------------------------------------------------------------------------------------------------------------|---|---|----|---|----|----|---------|
|  | cgd4_880            | ADA2 ortholog with a ZZ finger, SANT domain and a SWIRM domain                                                                    |   |   |    |   | 1  | 1  | 33.563  |
|  | cgd5_1280           | ffc4p like TFIIC subunit; TPR repeat containing basal transcription factor                                                        |   | 1 |    |   |    | 1  | 1.677   |
|  | cgd5_1690           | cactin-like protein                                                                                                               |   | 1 |    |   |    | 1  | 1.400   |
|  | cgd5_3290           | transcription elongation factor TFIIS                                                                                             |   |   |    |   | 1  | 1  | 69.364  |
|  | cgd5_3790           | SNF7 ortholog                                                                                                                     |   |   |    | 1 |    | 1  | 12.616  |
|  | cgd5_4200           | transcription initiation factor IIA                                                                                               | 1 |   |    |   |    | 1  | 0.309   |
|  | cgd5_670            | reptin52; reptin like TIP49 family AAA+ ATPase                                                                                    |   |   | 1  |   |    | 1  | 4.952   |
|  | cgd6_1430           | transcription factor E2F wHTH only                                                                                                |   |   |    |   | 1  | 1  | 169.529 |
|  | cgd6_2430           | BTF domain, basal transcription factor                                                                                            |   |   |    |   | 1  | 1  | 94.671  |
|  | cgd6_2480           | CCR4-NOT transcription complex, subunit 2; NOT2. C terminal Not2/Not3 domains                                                     |   |   |    |   | 1  | 1  | 2.929   |
|  | cgd6_3860           | SNF2 helicase, putative                                                                                                           |   |   |    |   | 1  | 1  | 3.447   |
|  | cgd6_4650           | 5kows transcription initiation protein SPT5                                                                                       |   |   |    |   | 1  | 1  | 4.155   |
|  | cgd6_5250           | transcription elongation factor, SPT6-like                                                                                        |   |   |    |   | 1  | 1  | 10.880  |
|  | cgd7_3240           | transcription activator, putative                                                                                                 |   |   |    |   | 1  | 1  | 34.500  |
|  | cgd7_3410           | SNF5 like protein                                                                                                                 | 1 |   | 1  |   |    | 2  | 1.981   |
|  | cgd7_3650           | DP1 DNA binding protein                                                                                                           |   |   |    |   | 1  | 1  | 91.275  |
|  | cgd8_1850           | E2F like domain containing transcription factor with the wHTH fold                                                                |   |   |    |   | 1  | 1  | 63.696  |
|  | cgd8_2030           | TATA-box factor binding protein                                                                                                   |   |   |    |   | 1  | 1  | 77.689  |
|  | cgd8_210            | transcription factor TFIID, TBP                                                                                                   |   |   | 1  |   |    | 1  | 4.473   |
|  | cgd8_2420           | transcription initiation factor IIF/ Rap30 like winged HTH                                                                        | 1 |   |    |   |    | 1  | 0.353   |
|  | cgd8_2770           | SNF2L ortholog with a SWI/SNF2 like ATPase and a Myb domain                                                                       |   |   |    |   | 1  | 1  | 13.645  |
|  | cgd8_4400           | transcription elongation factor TFIIS                                                                                             |   |   |    |   | 1  | 1  | 2.778   |
|  | cgd8_880            | transcription initiation factor TFIIB Sua7p; ZnR+2cyclins                                                                         |   |   |    |   | 1  | 1  | 2.575   |
|  | Transcription Total |                                                                                                                                   | 7 | 8 | 15 | 7 | 13 | 50 | 28.345  |
|  | Translation         |                                                                                                                                   |   |   |    |   |    |    |         |
|  | cgd1_1860           | GCN3p like EIF2B, translation initiation factor eIF-2B alpha subunit                                                              |   |   |    |   | 1  | 1  | 3.932   |
|  | cgd1_2420           | SUA5 like RNA binding domain containing protein                                                                                   |   |   |    |   | 1  | 1  | 100.769 |
|  | cgd1_880            | eukaryotic initiation factor 4A (eIF4A) (eIF-4A)                                                                                  |   |   |    |   | 1  | 1  | 889.383 |
|  | cgd2_110            | Dbp6p, eIF4a-1 family RNA SFII helicase                                                                                           |   |   |    |   | 1  | 1  | 28.753  |
|  | cgd2_1160           | HSPC021/HSPC025 family protein                                                                                                    |   |   | 1  |   |    | 1  | 2.508   |
|  | cgd2_1500           | possible translation initiation factor with possible PINT domain                                                                  |   | 1 |    |   |    | 1  | 1.710   |
|  | cgd2_2070           | translation elongation factor EF-1, subunit alpha, putative                                                                       |   |   |    |   | 1  | 1  | 7.846   |
|  | cgd2_2430           | ximpact ortholog conserved protein seen in bacteria and eukaryotes                                                                |   |   |    |   | 1  | 1  | 2.767   |
|  | cgd2_270            | translation initiation factor eIF-3 subunit 7                                                                                     |   |   |    |   | 1  | 1  | 4.994   |
|  | cgd2_360            | prtip-like IF39 eukaryotic translation initiation factor 3                                                                        |   |   |    |   | 1  | 1  | 7.079   |
|  | cgd2_3920           | eIF4G eukaryotic initiation factor 4, Nic domain containing protein                                                               |   |   |    |   | 1  | 1  | 2.630   |
|  | cgd2_3930           | deoxyhypusine synthase/spermidine:eIF5A-lysine 4-aminobutyltransferase                                                            |   |   |    |   | 1  | 1  | 14.982  |
|  | cgd2_3950           | putative translation elongation factor 1 beta 1                                                                                   |   | 1 |    |   |    | 1  | 2.292   |
|  | cgd2_820            | putative translation initiation factor 1 (eIF1), SUI1p                                                                            |   |   |    |   | 1  | 1  | 178.680 |
|  | cgd3_1650           | eIF2G GTPase. eukaryotic translation initiation factor 2 gamma subunit (ZnR+GTPase)                                               |   |   |    |   | 1  | 1  | 3.535   |
|  | cgd3_280            | mRNA translation inhibitor SKI2 SFII helicase, DEXDc+HELICc                                                                       | 1 |   |    |   |    | 1  | 0.332   |
|  | cgd3_3020           | possible guaning nucleotide exchange factor, eIF-2B                                                                               |   |   |    |   | 1  | 1  | 15.514  |
|  | cgd3_3340           | SECIS binding protein. pelota RNA binding domain containing protein                                                               |   |   |    |   | 1  | 1  | 85.730  |
|  | cgd3_3380           | Dbp9p, eIF4A-1-family RNA SFII helicase, DEXDc+HELICc                                                                             |   |   |    |   | 1  | 1  | 16.378  |
|  | cgd3_4020           | eIF-3 p25/subunit 11                                                                                                              |   |   |    |   | 1  | 1  | 9.589   |
|  | cgd4_1030           | eukaryotic translation initiation factor                                                                                          |   |   |    |   | 1  | 1  | 3.984   |
|  | cgd4_1840           | Dbp7p, eIF4A-a-family RNA SFII helicase (DEXDc+HELICc)                                                                            |   |   |    |   | 1  | 1  | 14.212  |
|  | cgd4_3130           | putative eIF6, translation initiation factor 6                                                                                    |   |   |    |   | 1  | 1  | 55.583  |
|  | cgd4_3180           | Rrp3p, eIF4A-1-family RNA SFII helicase (DEXDc+HELICc)                                                                            |   |   |    |   | 1  | 1  | 5.396   |
|  | cgd5_1600           | translation initiation factor if-2B beta; eIF-2                                                                                   |   |   |    |   | 1  | 1  | 4.386   |
|  | cgd5_390            | putative eukaryotic translation initiation factor 3                                                                               |   |   |    |   | 1  | 1  | 3.508   |
|  | cgd5_680            | eukaryotic translation initiation factor 3 37.28 kDa subunit, putative                                                            |   |   |    |   | 1  | 1  | 2.863   |
|  | cgd6_1020           | translation initiation factor if-4E                                                                                               |   | 1 |    |   |    | 1  | 1.433   |
|  | cgd6_1200           | diphthine synthase; diphthamide biosynthesis methyltransferase                                                                    |   |   |    |   | 1  | 1  | 8.786   |
|  | cgd6_1590           | eukaryotic translation initiation factor 4 gamma; Nic domain containing protein                                                   |   |   |    |   | 1  | 1  | 13.961  |
|  | cgd6_2180           | Fun12p GTPase; translation initiation factor IF2                                                                                  |   |   |    |   | 1  | 1  | 35.952  |
|  | cgd6_2230           | diphthamide biosynthesis; OVCA1/DPH2 protein-like; AE group (Note: old=diphthamide; Diphthamide is a modified histidine in eEF-2) |   |   |    |   | 1  | 1  | 4.029   |
|  | cgd6_2260           | Hca4p helicase DBP4 (helicase CA4). EIF4A-1-family RNA SFII helicase                                                              |   |   |    |   | 1  | 1  | 8.122   |
|  | cgd6_3210           | Rok1p, eIF4A-1-family RNA SFII helicase                                                                                           |   |   |    |   | 1  | 1  | 18.835  |
|  | cgd6_3380           | Erf1 eukaryotic translation termination factor 1; N-terminal RNaseH plus pelota domain containing protein                         |   |   |    |   | 1  | 1  | 4.351   |
|  | cgd6_3420           | translation initiation factor EIF-2B epsilon subunit                                                                              | 1 |   |    |   |    | 1  | 0.496   |
|  | cgd6_3960           | elongation factor-like protein                                                                                                    |   |   |    |   | 1  | 1  | 13.004  |
|  | cgd6_3990           | elongation factor 1 alpha                                                                                                         |   |   |    |   | 1  | 1  | 156.058 |
|  | cgd6_4830           | Drs1p, eIF4a-1-family RNA SFII helicase                                                                                           |   |   |    |   | 1  | 1  | 3.459   |

|                 |                  |                              |                                                                                                                                                                                                         |           |           |           |           |           |            |               |
|-----------------|------------------|------------------------------|---------------------------------------------------------------------------------------------------------------------------------------------------------------------------------------------------------|-----------|-----------|-----------|-----------|-----------|------------|---------------|
|                 |                  | cgd6_4860                    | nucleolar protein GU2. eIF4A-1-family. RNA SFII helicase                                                                                                                                                |           |           |           |           | 1         | 1          | 354.202       |
|                 |                  | cgd7_1080                    | eIF3-p47 with JAB/PAD domain                                                                                                                                                                            |           |           | 1         |           |           | 1          | 3.133         |
|                 |                  | cgd7_2300                    | translation initiation factor if-5A                                                                                                                                                                     |           |           |           |           | 1         | 1          | 1,056.848     |
|                 |                  | cgd7_2430                    | translation initiation factor eIF-5; Tif5p, ZnR+W2 domains                                                                                                                                              |           |           |           |           | 1         | 1          | 1,025.727     |
|                 |                  | cgd7_3940                    | eIF4A-1; eukaryotic translation initiation factor 4A-1; RNA SFII helicase                                                                                                                               |           | 1         |           |           |           | 1          | 1.640         |
|                 |                  | cgd7_5180                    | eIF3 gamma/P40 with JAB/PAD domains; translation initiation factor IF-3 subunit 3                                                                                                                       |           |           |           | 1         |           | 1          | 18.624        |
|                 |                  | cgd7_5270                    | Translation initiation factor 2, alpha subunit(eIF2-alpha); S1-like RNA binding domain                                                                                                                  |           |           | 1         |           |           | 1          | 3.336         |
|                 |                  | cgd7_880                     | eIF-3A like translation initiation factor that has a WD40 repeat-containing beta propeller                                                                                                              | 1         |           |           |           |           | 1          | 0.415         |
|                 |                  | cgd8_2930                    | Eft2p GTPase; translation elongation factor 2 (EF-2)                                                                                                                                                    |           |           |           |           | 1         | 1          | 35.996        |
|                 |                  | cgd8_3940                    | eIF-2B gamma, eukaryotic translation initiation factor 2B subunit 3 that has a nucleotide diphospho sugar transferase at the N-terminus and a UDP N-acetylglucosamine acyltransferase at the C-terminus | 1         |           |           |           |           | 1          | 0.379         |
|                 |                  | cgd8_4430                    | translation initiation factor if-2 betam beta subunit ZnR                                                                                                                                               |           |           |           |           | 1         | 1          | 20.879        |
|                 |                  | cgd8_4750                    | Dbp5p-like eIF4A-1-family RNA SFII helicase                                                                                                                                                             |           |           |           |           | 1         | 1          | 9.068         |
|                 |                  | cgd8_800                     | Prp5p C terminal KH. eIF4A-1-family RNA SFII helicase                                                                                                                                                   | 1         |           |           |           |           | 1          | 0.342         |
|                 |                  | Translation Total            |                                                                                                                                                                                                         | 5         | 4         | 16        | 15        | 12        | 52         | 82.085        |
|                 |                  | <b>Gene expression Total</b> |                                                                                                                                                                                                         | <b>16</b> | <b>18</b> | <b>36</b> | <b>28</b> | <b>30</b> | <b>128</b> | <b>48.070</b> |
| <b>General</b>  | General          | cgd1_2980                    | 14-3-3 protein                                                                                                                                                                                          | 1         |           |           |           |           | 1          | 0.623         |
|                 |                  | cgd2_1700                    | 2x Ef hands, calmodulin-like                                                                                                                                                                            | 1         |           |           |           |           | 1          | 0.511         |
|                 |                  | cgd2_810                     | calmodulin                                                                                                                                                                                              |           |           |           |           | 1         | 1          | 53.413        |
|                 |                  | cgd3_1290                    | 14-3-3 domain containing protein                                                                                                                                                                        |           | 1         |           |           |           | 1          | 1.619         |
|                 |                  | cgd6_730                     | 14-3-3 domain containing protein                                                                                                                                                                        | 1         |           |           |           |           | 1          | 0.386         |
|                 |                  | cgd7_2470                    | 14-3-3 domain containing protein                                                                                                                                                                        | 1         |           |           |           |           | 1          | 0.337         |
|                 |                  | cgd7_3950                    | 2*FF domain protein (phosphopeptide binding)                                                                                                                                                            | 1         |           |           |           |           | 1          | 0.310         |
|                 |                  | General Total                |                                                                                                                                                                                                         | 5         | 1         |           |           | 1         | 7          | 8.171         |
|                 |                  | <b>General Total</b>         |                                                                                                                                                                                                         | <b>5</b>  | <b>1</b>  |           |           | <b>1</b>  | <b>7</b>   | <b>8.171</b>  |
| <b>Membrane</b> | Membrane traffic | cgd1_1120                    | epsin like ENTH domain (alpha-alpha superhelix)involved in vesicular transport                                                                                                                          |           | 1         |           |           |           | 1          | 1.560         |
|                 |                  | cgd1_1340                    | VDP/USO1/YBL047C family vesicular transport factor                                                                                                                                                      | 1         |           |           |           |           | 1          | 0.464         |
|                 |                  | cgd1_1770                    | putative Rab5-interacting protein                                                                                                                                                                       |           |           |           | 1         |           | 1          | 9.815         |
|                 |                  | cgd1_1830                    | TB2/DP1/HVA22 family integral membrane protein that may be involved in membrane trafficking, 3x transmembrane domains                                                                                   |           |           |           |           | 1         | 1          | 69.400        |
|                 |                  | cgd1_1890                    | vesicle transport protein, putative                                                                                                                                                                     | 1         |           |           |           |           | 1          | 0.533         |
|                 |                  | cgd1_200                     | ADP-ribosylation factor-like protein 2 (ARL2), putative                                                                                                                                                 | 1         |           |           |           |           | 1          | 0.413         |
|                 |                  | cgd1_2060                    | Rab2 GTPase, putative                                                                                                                                                                                   | 1         |           |           |           |           | 1          | 0.478         |
|                 |                  | cgd1_2580                    | Arl1p/ARF like GTPase involved in vesicular transport                                                                                                                                                   | 1         |           |           |           |           | 1          | 0.343         |
|                 |                  | cgd1_2830                    | syntaxin 5A ortholog, possible transmembrane domain or GPI at C-terminus                                                                                                                                | 1         |           |           |           |           | 1          | 0.370         |
|                 |                  | cgd1_2920                    | golgi transport SNARE BOS1 secretory pathway protein, possible transmembrane or GPI anchor at C-terminus                                                                                                |           | 1         |           |           |           | 1          | 1.551         |
|                 |                  | cgd1_580                     | dynammin-like protein                                                                                                                                                                                   |           |           | 1         |           |           | 1          | 2.707         |
|                 |                  | cgd2_1140                    | syntaxin, putative, SMART syntaxin+tSNARE+transmembrane domain or GPI anchor at C-terminus                                                                                                              | 1         |           |           |           |           | 1          | 0.376         |
|                 |                  | cgd2_1570                    | putative vacuolar protein sorting/targeting protein 26                                                                                                                                                  |           | 1         |           |           |           | 1          | 1.488         |
|                 |                  | cgd2_1940                    | RAB6 protein, putative                                                                                                                                                                                  | 1         |           |           |           |           | 1          | 0.331         |
|                 |                  | cgd2_3010                    | N-ethylmaleimide-sensitive factor (NSF1)-like AAA ATPase involved in vesicular transport                                                                                                                | 1         |           |           |           |           | 1          | 0.365         |
|                 |                  | cgd2_3400                    | dynammin-related protein, putative                                                                                                                                                                      | 1         |           |           |           |           | 1          | 0.485         |
|                 |                  | cgd2_3410                    | ARF1/2 like small GTPase, putative                                                                                                                                                                      |           |           |           | 1         |           | 1          | 20.351        |
|                 |                  | cgd3_1070                    | synaptobrevin like SNARE                                                                                                                                                                                | 1         |           |           |           |           | 1          | 0.515         |
|                 |                  | cgd3_180                     | domain KOG1666, V-SNARE (intracellular trafficking, secretion, and vesicular transport)                                                                                                                 |           |           | 1         |           |           | 1          | 4.264         |
|                 |                  | cgd3_1820                    | putative Sec23                                                                                                                                                                                          |           |           | 1         |           |           | 1          | 2.720         |
|                 |                  | cgd3_3150                    | Rab5 like small GTPase                                                                                                                                                                                  | 1         |           |           |           |           | 1          | 0.401         |
|                 |                  | cgd4_2930                    | vacuolar sorting protein VPS52/suppressor of actin Sac2-family protein                                                                                                                                  | 1         |           |           |           |           | 1          | 0.316         |
|                 |                  | cgd4_3420                    | Vps53-N family protein involved invacuolar protein sorting                                                                                                                                              | 1         |           |           |           |           | 1          | 0.453         |
|                 |                  | cgd4_4300                    | beta adaptin                                                                                                                                                                                            |           |           | 1         |           |           | 1          | 2.884         |
|                 |                  | cgd5_3850                    | adapter-protein complex 1 gamma subunit (gamma adaptin)                                                                                                                                                 | 1         |           |           |           |           | 1          | 0.324         |
|                 |                  | cgd5_4180                    | vacuolar protein-sorting protein VPS45, putative                                                                                                                                                        | 1         |           |           |           |           | 1          | 0.302         |
|                 |                  | cgd6_150                     | synaptobrevin'synaptobrevin, adjacent duplicated gene'                                                                                                                                                  |           |           |           | 1         |           | 1          | 11.762        |
|                 |                  | cgd6_2070                    | adaptin AP complex subunit alpha; ARM repeats                                                                                                                                                           | 1         |           |           |           |           | 1          | 0.346         |
|                 |                  | cgd6_3220                    | RAS small GTPases RIC1/ypt1                                                                                                                                                                             |           | 1         |           |           |           | 1          | 1.598         |
|                 |                  | cgd6_4930                    | beta-adaptin AP complex subunit-related; ARM/HEAT repeat protein                                                                                                                                        | 1         |           |           |           |           | 1          | 0.419         |
|                 |                  | cgd6_510                     | synaptobrevin/VAMP-like protein                                                                                                                                                                         |           |           |           | 1         |           | 1          | 5.863         |
|                 |                  | cgd7_1680                    | Rab7 GTPase, putative                                                                                                                                                                                   |           |           | 1         |           |           | 1          | 3.055         |
|                 |                  | cgd7_1820                    | BET3 vesicular transport protein                                                                                                                                                                        | 1         |           |           |           |           | 1          | 0.313         |
|                 |                  | cgd7_1910                    | coatomer SEC21 gamma subunit like (beta adaptin)                                                                                                                                                        | 1         |           |           |           |           | 1          | 0.486         |
|                 |                  | cgd7_2060                    | vacuolar protein sorting 29                                                                                                                                                                             | 1         |           |           |           |           | 1          | 0.388         |
|                 |                  | cgd7_2940                    | coatomer complex delta chain                                                                                                                                                                            | 1         |           |           |           |           | 1          | 0.347         |
|                 |                  | cgd7_3130                    | ER vesicle protein; Erv41p, transmembrane region near C terminus and possible N region transmembrane                                                                                                    |           | 1         |           |           |           | 1          | 2.014         |
|                 |                  | cgd7_4210                    | Sec61-gamma subunit of protein translocation complex, putative                                                                                                                                          |           | 1         |           |           |           | 1          | 1.396         |

|                            |           |                                                                                                                              |                                                                                         |           |          |          |           |           |               |
|----------------------------|-----------|------------------------------------------------------------------------------------------------------------------------------|-----------------------------------------------------------------------------------------|-----------|----------|----------|-----------|-----------|---------------|
|                            | cgd7_4380 | Rablib [rab11b]                                                                                                              | 1                                                                                       |           |          |          |           | 1         | 0.352         |
|                            | cgd7_4740 | Rab GDP dissociation inhibitor                                                                                               | 1                                                                                       |           |          |          |           | 1         | 0.367         |
|                            | cgd7_5010 | coatamer complex beta                                                                                                        | 1                                                                                       | 1         |          |          |           | 2         | 0.986         |
|                            | cgd7_5300 | Rab geranylgeranyltransferase, alpha subunit                                                                                 | 1                                                                                       |           |          |          |           | 1         | 0.360         |
|                            | cgd7_5460 | VPS16 vacuolar sorting protein                                                                                               |                                                                                         | 1         |          |          |           | 1         | 1.701         |
|                            | cgd7_670  | t-SNARE domain followed by hydrophobic stretch                                                                               | 1                                                                                       |           |          |          |           | 1         | 0.444         |
|                            | cgd8_1080 | STXBP/UNC-18/SEC1 syntaxin involved in golgi transport                                                                       | 1                                                                                       |           |          |          |           | 1         | 0.427         |
|                            | cgd8_1250 | SEC24C-like component of COPII coatamer of ER-golgi vesicles                                                                 | 1                                                                                       |           |          |          |           | 1         | 0.491         |
|                            | cgd8_1270 | clathrin heavy chain                                                                                                         |                                                                                         |           | 1        |          |           | 1         | 1.801         |
|                            | cgd8_1640 | RAB acceptor, possible 2 or more transmembrane domains                                                                       | 1                                                                                       |           |          |          |           | 1         | 0.352         |
|                            | cgd8_1910 | epsin like ENTH/VHS domain involved in endocytosis/vesicular trafficking                                                     |                                                                                         |           |          | 1        |           | 1         | 5.178         |
|                            | cgd8_1990 | dynamitin like TRAFAC class GTPase domain                                                                                    | 1                                                                                       |           |          |          |           | 1         | 0.420         |
|                            | cgd8_2630 | APG10/ Aut1p like like autophagocytosis protein involved in vacuolar transport                                               |                                                                                         |           |          | 1        |           | 1         | 3.449         |
|                            | cgd8_2900 | ERV41 like membrane associated protein involved in vesicular transport with a transmembrane region near the C-terminus       |                                                                                         |           | 1        |          |           | 1         | 1.640         |
|                            | cgd8_2920 | Vps60p /Vps20p like protein involved in vacuolar protein sorting                                                             | 1                                                                                       |           |          |          |           | 1         | 0.390         |
|                            | cgd8_4040 | Aps1p/AP17 like clathrin adaptor protein                                                                                     | 1                                                                                       |           |          |          |           | 1         | 0.371         |
|                            | cgd8_860  | coatamer protein complex subunit alpha, putative                                                                             |                                                                                         |           |          |          | 1         | 1         | 6.262         |
|                            | cgd8_910  | vacuolar membrane protein pep3, human vacuolar protein sorting 18-like protein with a metal binding domain at the C-terminus |                                                                                         |           |          |          | 1         | 1         | 6.480         |
|                            | cgd8_950  | clathrin coat assembly protein AP50                                                                                          | 1                                                                                       |           |          |          |           | 1         | 0.389         |
| Membrane traffic Total     |           |                                                                                                                              | 34                                                                                      | 10        | 7        | 6        | 1         | 58        | 3.173         |
| Mucin                      | cgd1_3550 | mucin-like low complexity glycoprotein with a signal peptide and an apple domain.                                            | 1                                                                                       |           |          |          |           | 1         | 0.402         |
|                            | cgd2_400  | signal peptide, serine stretches, possible low mw mucin glycoprotein locus of 6 genes                                        |                                                                                         |           |          |          | 1         | 1         | 78.202        |
|                            | cgd2_410  | signal peptide, serine stretches, possible low mw mucin glycoprotein, locus of 6 genes                                       |                                                                                         |           |          |          | 1         | 1         | 48.299        |
|                            | cgd2_420  | signal peptide, serine proline rich, possible low mw mucin glycoprotein locus of 6 genes                                     |                                                                                         |           |          |          | 1         | 1         | 251.769       |
|                            | cgd2_430  | signal peptide, serine proline rich, possible low mw mucin glycoprotein locus of 6 genes                                     |                                                                                         |           |          |          | 1         | 1         | 1,732.542     |
|                            | cgd2_440  | signal peptide, serine proline rich, possible low mw mucin glycoprotein locus of 6 genes                                     |                                                                                         |           |          | 1        |           | 1         | 21.108        |
|                            | cgd2_450  | signal peptide, serine proline rich, possible low mw mucin glycoprotein locus of 6 genes                                     |                                                                                         |           | 1        |          |           | 1         | 2.636         |
|                            | cgd3_440  | C-type lectin containing protein with a transmembrane domain and mucin-like rich regions                                     |                                                                                         | 1         |          |          |           | 1         | 1.791         |
|                            | cgd4_3550 | secreted protein with signal peptide and 12 KAZAL repeats and a mucin-like stretch of threonines                             |                                                                                         |           |          |          | 1         | 1         | 495.075       |
|                            | cgd5_1210 | hypothetical protein with Thr stretches, possible mucin                                                                      |                                                                                         |           |          | 1        |           | 1         | 13.191        |
|                            | cgd5_2060 | hypothetical protein with signal peptide and mucin-like threonine repeats                                                    |                                                                                         |           |          |          | 1         | 1         | 493.875       |
|                            | cgd6_5400 | protein with signal peptide plus thr stretch, cys rich, possible mucin                                                       |                                                                                         |           |          |          | 1         | 1         | 837.635       |
|                            | cgd6_5410 | signal peptide plus thr stretch, charged repeats, likely mucin                                                               |                                                                                         |           |          |          | 1         | 1         | 1,210.260     |
|                            | cgd7_4020 | cryptosporidial mucin, large thr stretch, signal peptide sequence                                                            |                                                                                         |           |          |          | 1         | 1         | 40.935        |
|                            | cgd7_4660 | secreted mucin like glycoprotein, signal peptide, thr stretch                                                                |                                                                                         | 1         |          |          |           | 1         | 2.207         |
|                            | cgd8_3520 | secreted protein with cysteine rich repeats and a mucin like threonine rich repeat, signal peptide                           |                                                                                         |           |          |          | 1         | 1         | 864.971       |
| Mucin Total                |           |                                                                                                                              | 1                                                                                       | 2         | 1        | 2        | 10        | 16        | 380.931       |
| TRAP                       | cgd1_3500 | thrombospondin related adhesive protein                                                                                      |                                                                                         |           |          | 1        |           | 1         | 4.454         |
|                            | cgd1_3510 | TSP1 domain-containing protein TSP3 precursor                                                                                |                                                                                         | 1         |          |          |           | 1         | 1.937         |
|                            | cgd5_3420 | TRAP-C2 extracellular protein                                                                                                | 1                                                                                       |           |          |          |           | 1         | 0.425         |
| TRAP Total                 |           |                                                                                                                              | 1                                                                                       | 1         | 1        |          |           | 3         | 2.272         |
| <b>Membrane Total</b>      |           |                                                                                                                              | <b>36</b>                                                                               | <b>13</b> | <b>9</b> | <b>8</b> | <b>11</b> | <b>77</b> | <b>81.633</b> |
| <b>Mitochondrial</b>       | Enzyme    | cgd3_3120                                                                                                                    | AOX1, alternative oxidase, possible fungal or bacterial origin, 2 transmembrane regions | 1         |          |          |           | 1         | 0.403         |
|                            |           | cgd4_3040                                                                                                                    | NifS-like protein; cysteine desulfurase                                                 |           |          |          | 1         | 1         | 17.058        |
|                            |           | cgd5_3400                                                                                                                    | mitochondrial processing peptidase beta subunit                                         |           | 1        |          |           | 1         | 1.844         |
|                            |           | cgd6_1050                                                                                                                    | IscU-like NifU protein, iron-sulfur protein                                             |           |          |          | 1         | 1         | 89.806        |
|                            |           | cgd7_1900                                                                                                                    | mitochondrial NADH dehydrogenase                                                        |           |          | 1        |           | 1         | 24.182        |
|                            |           | cgd7_2080                                                                                                                    | mitochondrial processing peptidase, insulinase like metalloprotease                     |           | 1        |          |           | 1         | 1.464         |
| Enzyme Total               |           |                                                                                                                              | 1                                                                                       | 2         |          | 2        | 1         | 6         | 22.460        |
| F-ATPase                   | cgd2_1360 | ATP synthase beta chain, mitochondrial precursor, putative                                                                   |                                                                                         |           |          |          | 1         | 1         | 351.081       |
|                            | cgd6_610  | ATP synthase alpha chain                                                                                                     |                                                                                         |           | 1        |          |           | 1         | 4.079         |
| F-ATPase Total             |           |                                                                                                                              |                                                                                         |           | 1        |          | 1         | 2         | 177.580       |
| Membrane protein           | cgd3_3560 | CorA family mitochondrial membrane protein with 2 transmembrane domains at C-terminus                                        | 1                                                                                       |           |          |          |           | 1         | 0.393         |
| Membrane protein Total     |           |                                                                                                                              | 1                                                                                       |           |          |          |           | 1         | 0.393         |
| Mito carrier protein       | cgd2_1030 | mitochondrial carrier protein, putative                                                                                      |                                                                                         |           | 1        |          |           | 1         | 3.194         |
|                            | cgd6_2350 | mitochondrial carrier protein, 4 transmembrane domain                                                                        |                                                                                         |           |          | 1        |           | 1         | 13.061        |
|                            | cgd6_2360 | mitochondrial FAD carrier protein                                                                                            | 1                                                                                       |           |          |          |           | 1         | 0.513         |
|                            | cgd6_3880 | mitochondrial carrier protein MRS2 with 2 transmembrane domains                                                              |                                                                                         |           |          | 1        |           | 1         | 9.244         |
| Mito carrier protein Total |           |                                                                                                                              | 1                                                                                       |           | 1        | 2        |           | 4         | 6.503         |

|                            |                   |           |                                                                                                                      |    |   |   |   |   |    |         |
|----------------------------|-------------------|-----------|----------------------------------------------------------------------------------------------------------------------|----|---|---|---|---|----|---------|
|                            | Translocase       | cgd1_2560 | Tom40p like translocase                                                                                              | 1  |   |   |   |   | 1  | 0.335   |
|                            |                   | cgd2_4140 | mitochondrial import inner membrane translocase subunit tim17                                                        |    |   | 1 |   |   | 1  | 2.460   |
|                            |                   | cgd2_520  | mitochondrial phosphate translocator                                                                                 |    |   |   | 1 |   | 1  | 4.904   |
|                            |                   | cgd4_3170 | putative mitochondrial inner membrane translocase                                                                    |    | 1 |   |   |   | 1  | 1.740   |
|                            | Translocase Total |           |                                                                                                                      | 1  | 1 | 2 |   |   | 4  | 2.360   |
| <b>Mitochondrial Total</b> |                   |           |                                                                                                                      | 4  | 3 | 4 | 4 | 2 | 17 | 30.927  |
| <b>Protein degradation</b> | Proteasome        | cgd1_2490 | proteasome subunit beta type 1, putative                                                                             |    |   |   |   | 1 | 1  | 30.539  |
|                            |                   | cgd1_2890 | beta transducin ortholog with WD40 repeats                                                                           |    |   |   | 1 |   | 1  | 27.921  |
|                            |                   | cgd1_3480 | predicted proteasome regulatory complex component with a PINT domain at the C-terminus                               |    |   | 1 |   |   | 1  | 4.194   |
|                            |                   | cgd1_420  | 20S proteasome beta subunit D2 (PBD2) , putative                                                                     |    |   |   |   | 1 | 1  | 168.663 |
|                            |                   | cgd2_1020 | proteasome regulatory subunit Rpn9, PINT domain                                                                      |    |   | 1 |   |   | 1  | 2.890   |
|                            |                   | cgd2_1350 | 26S proteasome regulatory subunit, S6a like AAAATpase                                                                |    | 1 |   |   |   | 1  | 2.150   |
|                            |                   | cgd2_1440 | putative proteasome regulatory subunit, NTN hydrolase fold                                                           | 1  |   |   |   |   | 1  | 0.394   |
|                            |                   | cgd2_2210 | proteasome regulatory subunit Rpn7/26S proteasome subunit 6, PINT domain containing protein                          |    |   |   | 1 |   | 1  | 6.435   |
|                            |                   | cgd2_3370 | proteasome regulatory subunit Rpn12 family                                                                           | 1  |   |   |   |   | 1  | 0.520   |
|                            |                   | cgd2_860  | Pre3p/proteasome regulatory subunit beta type 6, NTN hydrolase fold                                                  | 1  |   |   |   |   | 1  | 0.562   |
|                            |                   | cgd3_2170 | proteasome subunit alpha1                                                                                            | 1  |   |   |   |   | 1  | 0.529   |
|                            |                   | cgd3_2530 | PUP1/proteasome subunit beta type 7, NTN hydrolase fold                                                              |    |   | 1 |   |   | 1  | 3.081   |
|                            |                   | cgd4_1170 | 26S proteasome regulatory subunit S4 like AAA ATpase                                                                 | 1  |   |   |   |   | 1  | 0.540   |
|                            |                   | cgd4_250  | proteasome subunit alpha type 4, NTN hydrolase fold                                                                  |    |   |   | 1 |   | 1  | 10.631  |
|                            |                   | cgd4_2540 | 26S proteasome regulatory subunit 26b like AAA ATpase                                                                |    |   |   | 1 |   | 1  | 14.557  |
|                            |                   | cgd4_530  | 26S proteasome regulatory subunit 5a with a vWA domain and two ubiquitin interacting motifs (UIM)                    | 1  |   |   |   |   | 1  | 0.385   |
|                            |                   | cgd5_2360 | p27 like 26S proteasomal subunit with a PDZ domain                                                                   | 1  |   |   |   |   | 1  | 0.464   |
|                            |                   | cgd5_4210 | Pre2p/proteasome subunit beta type 5; NTN hydrolase fold                                                             | 1  | 1 |   |   |   | 2  | 1.051   |
|                            |                   | cgd6_2300 | Cut4/Apc1p/TSG24 family protein; meiotic check point regulator and 26S proteasome regulatory complex; PC-rep repeats | 1  |   |   |   |   | 1  | 0.265   |
|                            |                   | cgd6_3270 | 26S proteasome-associated Mov34/MPN/PAD-1 family. JAB domain.                                                        | 1  |   |   |   |   | 1  | 0.488   |
|                            |                   | cgd6_3590 | 26S proteasome regulatory subunit Rpn6-like; PINT domain containing protein                                          | 1  |   |   |   |   | 1  | 0.393   |
|                            |                   | cgd6_4350 | 26S proteasome regulatory subunit 7 (RPT1)-like. AAA atpase                                                          | 1  |   |   |   |   | 1  | 0.408   |
|                            |                   | cgd6_920  | 26s protease regulatory subunit 8, putative                                                                          | 1  |   |   |   |   | 1  | 0.420   |
|                            |                   | cgd7_2900 | 26S proteasome regulatory subunit, inactive JAB domain protein                                                       |    |   | 1 |   |   | 1  | 4.459   |
|                            |                   | cgd7_3660 | proteasome subunit alpha2, protease of the acylase family and NTN hydrolase fold                                     |    |   |   |   | 1 | 1  | 41.786  |
|                            |                   | cgd8_3090 | proteasome activator p28/ Ki autoantigen                                                                             |    |   |   | 1 |   | 1  | 20.335  |
|                            |                   | cgd8_4060 | 26S proteasomal subunit S3; PINT domain containing protein                                                           | 1  |   |   |   |   | 1  | 0.550   |
|                            |                   | cgd8_630  | 26S proteasome regulatory complex, subunit PSMD5                                                                     |    |   |   | 1 |   | 1  | 7.003   |
|                            | Proteasome Total  |           |                                                                                                                      | 14 | 2 | 4 | 6 | 3 | 29 | 12.161  |
|                            | Ubiquitin         | cgd1_1170 | ubiquitin C-terminal hydrolase                                                                                       |    |   | 1 |   |   | 1  | 1.448   |
|                            |                   | cgd1_1530 | Rpn5 like 26S proteasomal regulatory subunit 12, PINT domain containing protein                                      |    |   | 1 |   |   | 1  | 1.535   |
|                            |                   | cgd1_1800 | transducin / WD-40 repeat protein family                                                                             | 1  |   |   |   |   | 1  | 0.395   |
|                            |                   | cgd1_290  | Ub6p like ubiquitin at N-terminus and ubiquitin C terminal hydrolase at the C-terminus                               | 1  |   |   |   |   | 1  | 0.336   |
|                            |                   | cgd1_410  | ubiquitin conjugating enzyme                                                                                         | 1  |   |   |   |   | 1  | 0.304   |
|                            |                   | cgd1_860  | ubiquitin-like protein, putative                                                                                     |    |   |   | 1 |   | 1  | 4.694   |
|                            |                   | cgd2_3450 | ubiquitin C-terminal hydrolase of the cysteine proteinase fold                                                       | 1  |   |   |   |   | 1  | 0.549   |
|                            |                   | cgd3_2190 | ubiquitin domain containing protein with a UBA domain at the C-terminus                                              |    |   |   | 1 |   | 1  | 6.636   |
|                            |                   | cgd3_2410 | ubiquitin-fusion degradation-2 (UFD2) family protein with a UBOX at the C-terminus                                   | 1  |   |   |   |   | 1  | 0.432   |
|                            |                   | cgd3_2460 | UbiA prenyltransferase family member (3I27) , putative                                                               |    |   | 1 |   |   | 1  | 1.711   |
|                            |                   | cgd3_2670 | protein with UBC domain, ubiquitin conjugating enzyme E2                                                             |    |   | 1 |   |   | 1  | 2.143   |
|                            |                   | cgd4_1200 | ubiquitin fusion degradation protein (UFD1); double Psi beta barrel fold                                             |    |   |   | 1 |   | 1  | 3.823   |
|                            |                   | cgd4_210  | Ubc1p like ubiquitin-conjugating enzyme E2 fused to a UBA domain (UBC+UBA)                                           | 1  |   |   |   |   | 1  | 0.367   |
|                            |                   | cgd4_2360 | DSK2 like protein with a ubiquitin domain, 2 STI1 motifs and a UBA domain at its C-terminus                          |    |   | 1 |   |   | 1  | 2.339   |
|                            |                   | cgd4_3150 | cullin-like protein of probable plant origin                                                                         |    |   |   | 1 |   | 1  | 2.419   |
|                            |                   | cgd4_40   | APG7-like ubiquitin activating enzyme E1                                                                             |    |   | 1 |   |   | 1  | 5.432   |
|                            |                   | cgd4_570  | ubiquitin-conjugating enzyme                                                                                         |    |   |   |   | 1 | 1  | 10.077  |
|                            |                   | cgd5_2480 | ubiquitin domain at the C-terminus                                                                                   | 1  |   |   |   |   | 1  | 0.374   |
|                            |                   | cgd5_2500 | ubiquitin C-terminal hydrolase of the cysteine proteinase fold                                                       |    |   | 1 |   |   | 2  | 1.680   |
|                            |                   | cgd6_1850 | anaphase promoting complex subunit 10, putative                                                                      | 1  | 1 |   |   |   | 1  | 1.001   |
|                            |                   | cgd6_2490 | e3 ubiquitin-protein ligase, putative                                                                                |    |   |   | 1 |   | 1  | 3.439   |
|                            |                   | cgd6_4040 | cullin domain containing protein                                                                                     | 1  |   |   |   |   | 1  | 0.429   |
|                            |                   | cgd6_4180 | ubiquitin-conjugating enzyme                                                                                         |    |   |   |   | 1 | 1  | 10.291  |
|                            |                   | cgd6_4550 | UBP_znfinger+UBA; UBP5 like deubiquitinating enzyme with a UB hydrolase domain and two UBA domains at the C-terminus | 1  |   |   |   |   | 1  | 0.478   |
|                            |                   | cgd7_2800 | ubiquitin-conjugating enzyme E2, putative                                                                            |    |   | 1 |   |   | 1  | 1.981   |
|                            |                   | cgd7_2840 | ubiquitin conjugating enzyme, putative                                                                               |    |   |   | 1 |   | 1  | 4.735   |
|                            |                   | cgd7_4900 | ubiquitin C-terminal hydrolase of the cysteine proteinase fold                                                       |    |   | 1 |   |   | 1  | 1.361   |

|                                  |                        |                 |                                                                                                                                             |    |    |    |   |    |    |         |
|----------------------------------|------------------------|-----------------|---------------------------------------------------------------------------------------------------------------------------------------------|----|----|----|---|----|----|---------|
|                                  |                        | cgd7_4990       | ubiquitin ligase with a HECT domain at the C-terminus                                                                                       | 1  |    |    |   |    | 1  | 0.458   |
|                                  |                        | cgd7_5020       | ubiquitin family protein                                                                                                                    |    | 1  |    |   |    | 1  | 1.696   |
|                                  |                        | cgd8_1200       | E3A like HECT domain containing ubiquitin protein ligase                                                                                    | 1  |    |    |   |    | 1  | 0.356   |
|                                  |                        | cgd8_1530       | ubiquitin carboxyl terminal hydrolase domain that is fused to a MATH domain                                                                 |    | 1  |    |   |    | 1  | 1.628   |
|                                  |                        | cgd8_160        | ubiquitin activating enzyme E1                                                                                                              | 1  |    |    |   |    | 1  | 0.438   |
|                                  |                        | cgd8_1730       | Uba3p like ubiquitin activating enzyme E1                                                                                                   | 1  |    |    |   |    | 1  | 0.418   |
|                                  |                        | cgd8_3850       | Ubc6p like ubiquitinating conjugating enzyme E2, possible transmembrane domain at C                                                         |    |    | 1  |   |    | 1  | 3.408   |
|                                  |                        | cgd8_4340       | ubiquitin carboxyl-terminal hydrolase of the cysteine proteinase fold                                                                       |    |    | 1  |   |    | 1  | 4.183   |
|                                  |                        | cgd8_580        | ubiquitin-conjugating enzyme E2, putative                                                                                                   |    |    | 1  |   |    | 1  | 2.735   |
|                                  |                        | cgd8_930        | RBX1 ortholog, RING finger (Associated with E3 ubiquitin-protein ligase complex)                                                            | 1  |    |    |   |    | 1  | 0.433   |
|                                  |                        | Ubiquitin Total |                                                                                                                                             | 15 | 11 | 9  | 3 |    | 38 | 2.294   |
| <b>Protein degradation Total</b> |                        |                 |                                                                                                                                             | 29 | 13 | 13 | 9 | 3  | 67 | 6.565   |
| <b>Redox homeostasis</b>         | Ferredoxin/FdxR        | cgd6_3000       | ferredoxin-like protein Fd1, putative                                                                                                       | 1  |    |    |   |    | 1  | 0.595   |
|                                  |                        | cgd8_2710       | NADPH:ferredoxin--NADP+ reductase with a rossman fold nucleotide binding domain and a 2Fe-2S ferredoxin domain                              | 1  |    |    |   |    | 1  | 0.368   |
|                                  | Ferredoxin/FdxR Total  |                 |                                                                                                                                             | 2  |    |    |   |    | 2  | 0.481   |
|                                  | Glutaredoxin           | cgd2_2540       | glutaredoxin related protein                                                                                                                |    |    |    |   | 1  | 1  | 250.416 |
|                                  |                        | cgd3_460        | glutathione peroxidase                                                                                                                      |    |    |    | 1 |    | 1  | 7.518   |
|                                  |                        | cgd6_3970       | glutaredoxin-like protein; 2 thioredoxin folds                                                                                              |    | 1  |    |   |    | 1  | 1.456   |
|                                  | Glutaredoxin Total     |                 |                                                                                                                                             |    | 1  |    | 1 | 1  | 3  | 86.463  |
|                                  | SOD                    | cgd5_3230       | superoxide dismutase                                                                                                                        | 1  |    |    |   |    | 1  | 0.489   |
|                                  | SOD Total              |                 |                                                                                                                                             | 1  |    |    |   |    | 1  | 0.489   |
|                                  | Thioredoxin            | cgd2_1780       | PDI like thioredoxin domain containing protein                                                                                              | 1  |    |    |   |    | 1  | 0.383   |
|                                  |                        | cgd2_4320       | thioredoxin reductase 1                                                                                                                     |    |    |    |   | 1  | 1  | 122.554 |
|                                  |                        | cgd4_1650       | possible thioredoxin H-type of possible fungal or plant origin, small protein                                                               |    | 1  |    |   |    | 1  | 1.427   |
|                                  |                        | cgd4_740        | thioredoxin peroxidase-like protein                                                                                                         |    | 1  |    |   |    | 1  | 1.488   |
|                                  |                        | cgd5_2030       | thioredoxin, putative                                                                                                                       | 1  |    |    |   |    | 1  | 0.405   |
|                                  |                        | cgd5_2230       | membrane associated thioredoxin                                                                                                             | 1  |    |    |   |    | 1  | 0.445   |
|                                  |                        | cgd5_660        | thioredoxin domain containing protein                                                                                                       | 1  |    |    |   |    | 1  | 0.486   |
|                                  |                        | cgd6_2470       | thioredoxin (quiescin Q6 like) having signal peptide and 12 transmembrane domains                                                           |    | 1  |    |   |    | 1  | 2.249   |
|                                  |                        | cgd6_850        | thioredoxin; protein disulfide isomerase A6, signal peptide, possible transmembrane domain in C-terminal region                             | 1  |    |    |   |    | 1  | 0.330   |
|                                  |                        | cgd7_3170       | thioredoxin fold protein related to phosducin                                                                                               | 1  |    |    |   |    | 1  | 0.433   |
|                                  |                        | cgd7_4840       | phosducin related thioredoxin fold protein                                                                                                  | 1  |    |    |   |    | 1  | 0.369   |
|                                  |                        | cgd7_5330       | thioredoxin/PDI, cyanobacterial type, signal peptide plus 4 transmembrane domains                                                           |    | 1  |    |   |    | 1  | 1.675   |
|                                  |                        | cgd8_3510       | thioredoxin-like protein, fragment                                                                                                          | 1  |    |    |   |    | 1  | 0.477   |
|                                  | Thioredoxin Total      |                 |                                                                                                                                             | 8  | 4  |    |   | 1  | 13 | 10.209  |
| <b>Redox homeostasis Total</b>   |                        |                 |                                                                                                                                             | 11 | 5  |    | 1 | 2  | 19 | 20.714  |
| <b>Ribosome biogenesis</b>       | Associated E/Pep       | cgd1_3130       | conserved eukaryotic nuclear protein that shares a domain with yeast Lcp5p, a component of the U3 small nucleolar ribonucleoprotein         |    |    |    |   | 1  | 1  | 42.968  |
|                                  |                        | cgd2_2420       | Yd1036cp-like RluD, S4+type 1 pseudouridine synthase                                                                                        |    | 1  |    |   |    | 1  | 4.514   |
|                                  |                        | cgd2_3680       | eukaryotic ribosome biogenesis; Erb1p, putative                                                                                             |    |    |    |   | 1  | 1  | 53.157  |
|                                  |                        | cgd2_4090       | YawG/Kre35p-like, Yjeq GTPase                                                                                                               |    |    |    | 1 |    | 1  | 18.447  |
|                                  |                        | cgd2_50         | SIK1 nucleolar protein Nop56                                                                                                                |    |    |    |   | 1  | 1  | 135.992 |
|                                  |                        | cgd3_1340       | NMD3p like protein involved in nonsense mediated decay                                                                                      |    |    |    |   | 1  | 1  | 160.626 |
|                                  |                        | cgd4_1480       | BMS1 like GTPase involved in ribosome biogenesis                                                                                            |    |    |    |   | 1  | 1  | 77.938  |
|                                  |                        | cgd4_1520       | Brx1p nucleolar protein required for biogenesis of the 60S ribosomal subunit                                                                |    |    |    |   | 1  | 1  | 83.744  |
|                                  |                        | cgd4_1580       | Spb1p-like, FtsJ methylase                                                                                                                  |    |    |    |   | 1  | 1  | 100.386 |
|                                  |                        | cgd4_3320       | Noc3 like protein involved in nuclear export of pre-ribosomes                                                                               |    |    |    | 1 |    | 1  | 13.214  |
|                                  |                        | cgd4_4040       | Yer006wp-like. Yjeq GTPase                                                                                                                  |    |    |    |   | 1  | 1  | 39.810  |
|                                  |                        | cgd4_660        | Nip7 like PUA domain containing protein involved in ribosomal biogenesis                                                                    |    |    |    |   | 1  | 1  | 75.875  |
|                                  |                        | cgd5_1190       | nucleolar protein NOP4; rrm domain containing protein                                                                                       |    |    |    | 1 |    | 1  | 11.459  |
|                                  |                        | cgd5_1240       | Tsr1p GTPase, multitransmembrane region protein                                                                                             |    |    |    |   | 1  | 1  | 68.678  |
|                                  |                        | cgd6_3230       | Nop2p family of SUN/fmu RNA methylase                                                                                                       |    |    |    | 1 |    | 1  | 8.442   |
|                                  |                        | cgd7_1620       | nop15p/nopp34; nucleolar protein with 1 RRM domain                                                                                          |    |    |    |   | 1  | 1  | 24.411  |
|                                  |                        | cgd7_4110       | WD40 protein (part of U3 processosome)                                                                                                      |    |    |    |   | 1  | 1  | 38.307  |
|                                  |                        | cgd7_4130       | Ynl022cp-like. SUN family methylase                                                                                                         |    |    |    | 1 |    | 1  | 12.053  |
|                                  |                        | cgd8_1550       | S. cerevisiae YLR387c-like protein with 2x C2H2 like zinc fingers conserved across eukaryotes plus an apicomplexan-specific globular domain |    | 1  |    |   |    | 1  | 2.783   |
|                                  |                        | cgd8_2000       | KRE33p like superfamily I ATPase fused to an acetylase                                                                                      |    |    |    |   | 1  | 1  | 54.173  |
|                                  |                        | cgd8_3360       | S. pombe SPAC1687.04 like conserved eukaryotic protein that shares a domain with several MCM7, probably involved in DNA replication         |    |    | 1  |   |    | 1  | 2.357   |
|                                  |                        | cgd8_3380       | Rrp12p like nucleolar protein                                                                                                               |    |    |    |   | 1  | 1  | 42.952  |
|                                  |                        | cgd8_4530       | ribosomal processing protein, putative                                                                                                      |    |    |    | 1 |    | 1  | 16.800  |
|                                  |                        | cgd8_900        | Ydr449cp/Utp6p; small (ribosomal) subunit (SSU) processosome (contains U3 snoRNA). HAT repeats                                              |    |    |    |   | 1  | 1  | 26.978  |
|                                  | Associated E/Pep Total |                 |                                                                                                                                             |    |    | 3  | 6 | 15 | 24 | 46.503  |
|                                  | Ribosomal protein      | cgd1_1660       | 60S ribosomal protein L36                                                                                                                   |    |    |    |   | 1  | 1  | 93.087  |

|           |                                                                                                                  |  |  |   |   |   |         |
|-----------|------------------------------------------------------------------------------------------------------------------|--|--|---|---|---|---------|
| cgd1_2270 | 40S ribosomal protein S26                                                                                        |  |  |   | 1 | 1 | 19.394  |
| cgd1_300  | 40S ribosomal protein S21                                                                                        |  |  |   | 1 | 1 | 91.571  |
| cgd1_3000 | 60S ribosomal protein L27                                                                                        |  |  |   | 1 | 1 | 91.898  |
| cgd1_850  | 40S ribosomal protein S19                                                                                        |  |  |   | 1 | 1 | 58.470  |
| cgd2_1070 | 40S ribosomal protein S25                                                                                        |  |  |   | 1 | 1 | 90.960  |
| cgd2_120  | ribosomal protein L29                                                                                            |  |  |   | 1 | 1 | 70.698  |
| cgd2_130  | 60S acidic ribosomal protein LP2                                                                                 |  |  |   | 1 | 1 | 14.045  |
| cgd2_170  | 40s ribosomal protein s24                                                                                        |  |  |   | 1 | 1 | 13.318  |
| cgd2_2200 | 60S ribosomal protein L37                                                                                        |  |  |   | 1 | 1 | 35.157  |
| cgd2_280  | 60S ribosomal protein L15                                                                                        |  |  |   | 1 | 1 | 124.917 |
| cgd2_2870 | 40S ribosomal protein S28, no good start Met                                                                     |  |  |   | 1 | 1 | 25.847  |
| cgd2_2990 | 60S ribosomal protein L13, putative                                                                              |  |  |   | 1 | 1 | 33.295  |
| cgd2_3000 | 40S ribosomal protein S16                                                                                        |  |  |   | 1 | 1 | 17.480  |
| cgd2_350  | 60S ribosomal protein L39                                                                                        |  |  |   | 1 | 1 | 36.593  |
| cgd2_4260 | 40S ribosomal protein S6                                                                                         |  |  |   | 1 | 1 | 63.051  |
| cgd3_1250 | ribosomal protein L14                                                                                            |  |  |   | 1 | 1 | 33.055  |
| cgd3_1300 | 60S ribosomal protein L12                                                                                        |  |  |   | 1 | 1 | 64.008  |
| cgd3_2090 | 40S ribosomal protein SAe                                                                                        |  |  |   | 1 | 1 | 41.474  |
| cgd3_2250 | 60S ribosomal protein L37A                                                                                       |  |  |   | 1 | 1 | 303.987 |
| cgd3_2440 | ribosomal protein S18A, rps18ap, HhH domain                                                                      |  |  |   | 1 | 1 | 33.305  |
| cgd3_3790 | 60S ribosomal protein L19                                                                                        |  |  |   | 1 | 1 | 12.318  |
| cgd3_3890 | 60S ribosomal protein L30, pelota RNA binding domain containing protein                                          |  |  |   | 1 | 1 | 27.176  |
| cgd3_3930 | 60S ribosomal protein L27A or L27a                                                                               |  |  |   | 1 | 1 | 122.472 |
| cgd3_4100 | conserved protein, COG SSU ribosomal protein S8E                                                                 |  |  |   | 1 | 1 | 40.342  |
| cgd3_830  | 60S ribosomal protein L35                                                                                        |  |  |   | 1 | 1 | 72.728  |
| cgd4_1230 | 60S ribosomal protein L28                                                                                        |  |  |   | 1 | 1 | 27.811  |
| cgd4_2260 | ribosomal protein PO like protein of the L10 family                                                              |  |  |   | 1 | 1 | 122.290 |
| cgd4_2400 | 60S ribosomal protein L31                                                                                        |  |  |   | 1 | 1 | 121.935 |
| cgd4_3080 | ribosomal protein S27a, ubiquitin plus zincribbon, UB13p                                                         |  |  |   | 1 | 1 | 36.928  |
| cgd4_3160 | putative 40S ribosomal protein S3A                                                                               |  |  |   | 1 | 1 | 46.278  |
| cgd4_4020 | 40S ribosomal protein S2/S5. DSRBD RNA binding domain                                                            |  |  |   | 1 | 1 | 42.169  |
| cgd4_470  | 60S ribosomal protein L18                                                                                        |  |  |   | 1 | 1 | 134.102 |
| cgd4_840  | possible 60S ribosomal protein L24                                                                               |  |  |   | 1 | 1 | 45.215  |
| cgd5_2110 | protein with conserved N-terminal localized cysteine-rich domain; predicted archaeo-eukaryotic ribosomal protein |  |  | 1 |   | 1 | 3.085   |
| cgd5_2210 | 40S ribosomal protein S13                                                                                        |  |  |   | 1 | 1 | 80.909  |
| cgd5_2370 | 60S acidic ribosomal protein LP1 like protein of possible plant origin                                           |  |  |   | 1 | 1 | 25.728  |
| cgd5_2630 | 60S ribosomal protein L7-B; Rp17bp; L30 RNA binding domain                                                       |  |  |   | 1 | 1 | 33.575  |
| cgd5_2780 | 40S ribosomal protein S10                                                                                        |  |  |   | 1 | 1 | 8.092   |
| cgd5_3040 | 40S ribosomal protein S7                                                                                         |  |  |   | 1 | 1 | 99.993  |
| cgd5_3720 | 40S ribosomal protein S17                                                                                        |  |  |   | 1 | 1 | 201.603 |
| cgd5_3740 | 40S ribosomal protein S12, pelota RNA binding domain containing protein                                          |  |  |   | 1 | 1 | 80.500  |
| cgd5_970  | 60S ribosomal protein L13A                                                                                       |  |  |   | 1 | 1 | 86.027  |
| cgd6_1390 | ribosomal protein S23                                                                                            |  |  |   | 1 | 1 | 166.953 |
| cgd6_2170 | 60S ribosomal protein L11                                                                                        |  |  |   | 1 | 1 | 216.518 |
| cgd6_2460 | 60s ribosomal protein L21                                                                                        |  |  |   | 1 | 1 | 55.563  |
| cgd6_3180 | 40S ribosomal protein S15                                                                                        |  |  |   | 1 | 1 | 7.340   |
| cgd6_3190 | 60S ribosomal protein-like, putative                                                                             |  |  |   | 1 | 1 | 85.370  |
| cgd6_3340 | 60S ribosomal protein L32                                                                                        |  |  |   | 1 | 1 | 27.353  |
| cgd6_3710 | 40S ribosomal protein S30                                                                                        |  |  |   | 1 | 1 | 28.469  |
| cgd6_4190 | 60S ribosomal protein L10, alpha/beta hammerhead                                                                 |  |  |   | 1 | 1 | 85.290  |
| cgd6_4320 | 40S ribosomal protein S5                                                                                         |  |  |   | 1 | 1 | 15.540  |
| cgd6_4620 | 60S ribosomal protein L26                                                                                        |  |  |   | 1 | 1 | 31.469  |
| cgd6_4630 | 40S ribosomal protein S8                                                                                         |  |  |   | 1 | 1 | 146.828 |
| cgd6_570  | 60S ribosomal protein L23                                                                                        |  |  |   | 1 | 1 | 137.766 |
| cgd7_1040 | Imp3p-like 40S ribosomal protein S9. S4 RNA binding domain                                                       |  |  |   | 1 | 1 | 50.011  |
| cgd7_130  | 40S ribosomal protein S14                                                                                        |  |  |   | 1 | 1 | 79.747  |
| cgd7_1460 | ribosomal protein S27                                                                                            |  |  |   | 1 | 1 | 193.971 |
| cgd7_1600 | ribosomal protein of the PO/L10 family                                                                           |  |  |   | 1 | 1 | 101.283 |
| cgd7_1880 | 60S ribosomal protein L44                                                                                        |  |  |   | 1 | 1 | 90.826  |
| cgd7_2110 | 60S ribosomal proteins L8/L2                                                                                     |  |  |   | 1 | 1 | 122.703 |
| cgd7_2250 | 40S ribosomal protein S3, KH domain                                                                              |  |  |   | 1 | 1 | 30.563  |
| cgd7_2280 | 60S ribosomal protein L40                                                                                        |  |  |   | 1 | 1 | 49.851  |
| cgd7_2420 | 60S ribosomal protein L22                                                                                        |  |  |   | 1 | 1 | 10.990  |
| cgd7_2540 | 60S ribosomal protein L35A                                                                                       |  |  |   | 1 | 1 | 164.629 |
| cgd7_320  | putative 60S ribosomal protein L18A                                                                              |  |  |   | 1 | 1 | 45.051  |
| cgd7_4050 | ribosomal protein L38                                                                                            |  |  |   | 1 | 1 | 127.806 |
| cgd7_4460 | 60S ribosomal protein L6                                                                                         |  |  |   | 1 | 1 | 76.053  |
| cgd7_4760 | ribosomal protein S4, putative                                                                                   |  |  |   | 1 | 1 | 88.747  |
| cgd7_5060 | putative 40S ribosomal protein S20                                                                               |  |  |   | 1 | 1 | 21.823  |
| cgd7_5310 | 60S ribosomal protein L24                                                                                        |  |  |   | 1 | 1 | 206.286 |
| cgd8_1840 | 40S ribosomal subunit protein S9, putative                                                                       |  |  |   | 1 | 1 | 29.131  |
| cgd8_2870 | 60S ribosomal protein L10A                                                                                       |  |  |   | 1 | 1 | 27.680  |
| cgd8_3450 | 60S ribosomal protein L17                                                                                        |  |  |   | 1 | 1 | 33.615  |



|                                  |                                                                                                                                   |                                                                                                                   |                                                                                                                                                                                                            |                                        |   |    |    |         |         |         |        |
|----------------------------------|-----------------------------------------------------------------------------------------------------------------------------------|-------------------------------------------------------------------------------------------------------------------|------------------------------------------------------------------------------------------------------------------------------------------------------------------------------------------------------------|----------------------------------------|---|----|----|---------|---------|---------|--------|
|                                  | cgd8_3480                                                                                                                         | 60S ribosomal protein L34                                                                                         |                                                                                                                                                                                                            |                                        |   |    | 1  | 1       | 359.597 |         |        |
|                                  | cgd8_400                                                                                                                          | 60S ribosomal protein L9                                                                                          |                                                                                                                                                                                                            |                                        |   |    | 1  | 1       | 76.419  |         |        |
|                                  | cgd8_4050                                                                                                                         | ribosomal protein S29                                                                                             |                                                                                                                                                                                                            |                                        |   |    | 1  | 1       | 36.522  |         |        |
|                                  | cgd8_430                                                                                                                          | 60S ribosomal protein L7A                                                                                         |                                                                                                                                                                                                            |                                        |   |    | 1  | 1       | 47.129  |         |        |
|                                  | cgd8_4350                                                                                                                         | 60S ribosomal protein L7                                                                                          |                                                                                                                                                                                                            |                                        |   |    | 1  | 1       | 64.096  |         |        |
|                                  | cgd8_4360                                                                                                                         | 40S ribosomal protein S15A                                                                                        |                                                                                                                                                                                                            |                                        |   | 1  |    | 1       | 13.826  |         |        |
|                                  | cgd8_440                                                                                                                          | 60S ribosomal protein L5                                                                                          |                                                                                                                                                                                                            |                                        |   |    | 1  | 1       | 91.543  |         |        |
|                                  | cgd8_650                                                                                                                          | 60S ribosomal protein L23A                                                                                        |                                                                                                                                                                                                            |                                        |   |    | 1  | 1       | 34.770  |         |        |
|                                  | <b>Ribosomal protein Total</b>                                                                                                    |                                                                                                                   |                                                                                                                                                                                                            |                                        | 1 | 11 | 70 | 82      | 74.464  |         |        |
| rRNA processing                  | cgd1_1670                                                                                                                         | bystin/ S.cerevisiae En1p like adaptor domain                                                                     |                                                                                                                                                                                                            |                                        |   |    | 1  | 1       | 38.816  |         |        |
|                                  | cgd1_3160                                                                                                                         | mRNA 3' end processing protein RNA14, HAT repeats                                                                 | 1                                                                                                                                                                                                          |                                        |   |    |    | 1       | 0.404   |         |        |
|                                  | cgd2_160                                                                                                                          | IMP4-like U3 small nucleolar ribonucleoprotein (snoRNP)                                                           |                                                                                                                                                                                                            |                                        |   |    | 1  | 1       | 42.116  |         |        |
|                                  | cgd3_1090                                                                                                                         | Rrp9p/U3-55K-family snoRNP-associated protein with several WD40 repeats                                           |                                                                                                                                                                                                            |                                        |   | 1  |    | 1       | 11.642  |         |        |
|                                  | cgd3_2950                                                                                                                         | ribosomal RNA assembly protein mis3/dribble/Krr1p. KH domain                                                      |                                                                                                                                                                                                            |                                        |   |    | 1  | 1       | 53.167  |         |        |
|                                  | cgd3_3850                                                                                                                         | Cbf5p; centromere-binding factor 5 like PUA domain containing protein with a type I pseudouridine synthase domain |                                                                                                                                                                                                            |                                        |   |    | 1  | 1       | 236.852 |         |        |
|                                  | cgd3_3970                                                                                                                         | Yer007c-ap/MCT-1 like PUA RNA binding domain containing protein                                                   |                                                                                                                                                                                                            |                                        | 1 |    |    | 1       | 3.618   |         |        |
|                                  | cgd4_1700                                                                                                                         | GNog1p. GTPase                                                                                                    |                                                                                                                                                                                                            |                                        |   |    | 1  | 1       | 276.149 |         |        |
|                                  | cgd4_2740                                                                                                                         | IMP4 U3 small nucleolar ribonucleoprotein                                                                         |                                                                                                                                                                                                            |                                        |   |    | 1  | 1       | 88.930  |         |        |
|                                  | cgd4_2750                                                                                                                         | PWP1 family protein with WD40 repeats                                                                             |                                                                                                                                                                                                            |                                        |   |    | 1  | 1       | 239.214 |         |        |
|                                  | cgd4_3800                                                                                                                         | Rrp8p like methyltransferase involved in rRNA processing                                                          |                                                                                                                                                                                                            |                                        |   | 1  |    | 1       | 8.222   |         |        |
|                                  | cgd5_3560                                                                                                                         | CNcl1p/MJ0026/YebU-like. SUN family methylase                                                                     |                                                                                                                                                                                                            |                                        | 1 |    |    | 1       | 5.874   |         |        |
|                                  | cgd7_2570                                                                                                                         | adrift-like. FTSJ family RNA methylase                                                                            |                                                                                                                                                                                                            |                                        |   | 1  |    | 1       | 6.987   |         |        |
|                                  | cgd7_3590                                                                                                                         | Mpp10 family of U3 processosome protein                                                                           |                                                                                                                                                                                                            |                                        |   | 1  |    | 1       | 6.951   |         |        |
|                                  | cgd8_2050                                                                                                                         | RRP5 like protein involved in rRNA biogenesis with 7 S1 domains and 5 HAT repeats                                 |                                                                                                                                                                                                            |                                        |   |    | 1  | 1       | 146.228 |         |        |
| cgd8_3390                        | S.cerevisiae Ssf2p/drosophila peter pan like protein that has an IMP4 domain at its N-terminus and is involved in rRNA processing |                                                                                                                   |                                                                                                                                                                                                            |                                        |   | 1  | 1  | 242.943 |         |         |        |
|                                  | <b>rRNA processing Total</b>                                                                                                      |                                                                                                                   | 1                                                                                                                                                                                                          |                                        | 2 | 4  | 9  | 16      | 88.007  |         |        |
| <b>Ribosome biogenesis Total</b> |                                                                                                                                   |                                                                                                                   | 1                                                                                                                                                                                                          |                                        | 6 | 21 | 94 | 122     | 70.739  |         |        |
| RNA metabolism                   | RNA binding                                                                                                                       | cgd1_1280                                                                                                         | domain KOG1676, K-homology type RNA binding proteins                                                                                                                                                       |                                        | 1 |    |    | 1       | 1.439   |         |        |
|                                  |                                                                                                                                   | cgd1_1580                                                                                                         | RING finger domain at N-terminus, CCCH domain at C-terminus, involved in RNA metabolism, HC-23 protein                                                                                                     |                                        |   |    | 1  | 1       | 256.528 |         |        |
|                                  |                                                                                                                                   | cgd1_250                                                                                                          | ATP-dependent RNA helicase, putative                                                                                                                                                                       |                                        |   | 1  |    |         | 1       | 5.533   |        |
|                                  |                                                                                                                                   | cgd1_2760                                                                                                         | yyaF/YCHF TRANSFAC/OBG family small GTPase plus RNA binding domain TGS                                                                                                                                     |                                        |   |    | 1  |         | 1       | 11.760  |        |
|                                  |                                                                                                                                   | cgd1_2960                                                                                                         | protein kinase CMGC group, Sky1p like S/T protein kinase probably involved in RNA metabolism                                                                                                               |                                        |   |    |    | 1       | 1       | 55.879  |        |
|                                  |                                                                                                                                   | cgd1_830                                                                                                          | sen1p/ NAM7 like superfamily I RNA helicase                                                                                                                                                                |                                        |   | 1  |    |         | 1       | 2.655   |        |
|                                  |                                                                                                                                   | cgd3_1590                                                                                                         | Spb4p, eIF4a-1-family RNA SFII helicase, DEXDc+HELICc domains                                                                                                                                              |                                        |   |    |    | 1       | 1       | 34.575  |        |
|                                  |                                                                                                                                   | cgd3_200                                                                                                          | zfw1 protein, CCCH like RNA binding domain fused to WD repeats                                                                                                                                             |                                        |   |    |    | 1       | 1       | 168.129 |        |
|                                  |                                                                                                                                   | cgd3_2580                                                                                                         | RNA binding protein                                                                                                                                                                                        |                                        |   |    | 1  |         | 1       | 9.912   |        |
|                                  |                                                                                                                                   | cgd3_2840                                                                                                         | Fmrp interacting protein like, contains 2 C2H2 zinc fingers involved in RNA metabolism                                                                                                                     |                                        |   |    | 1  |         | 1       | 10.285  |        |
|                                  |                                                                                                                                   | cgd3_3920                                                                                                         | DEAD/DEAH box ATP-dependent RNA helicase, putative                                                                                                                                                         |                                        |   |    |    | 1       | 1       | 92.761  |        |
|                                  |                                                                                                                                   | cgd4_3000                                                                                                         | Dbp1p, eIF4a-1 family RNA SFII helicase (DEXDC+HELICc)                                                                                                                                                     |                                        |   |    | 1  |         | 1       | 18.046  |        |
|                                  |                                                                                                                                   | cgd4_3880                                                                                                         | emap RNA binding domain protein (N terminal low complexity region)                                                                                                                                         |                                        |   |    |    | 1       | 1       | 6.720   |        |
|                                  |                                                                                                                                   | cgd4_4230                                                                                                         | ATP-dependent helicase, putative                                                                                                                                                                           |                                        |   |    |    | 1       | 1       | 72.883  |        |
|                                  |                                                                                                                                   | cgd5_1070                                                                                                         | CCCH RNA binding domain involved in RNA metabolism                                                                                                                                                         |                                        |   | 1  |    |         | 1       | 2.353   |        |
|                                  |                                                                                                                                   | cgd5_1380                                                                                                         | F11M21.28-like protein having 3 CCCH RNA binding domains; involved in RNA metabolism                                                                                                                       |                                        |   | 1  |    |         | 1       | 1.705   |        |
|                                  |                                                                                                                                   | cgd5_1830                                                                                                         | F11M21.28-like 3 CCCH RNA binding domain protein involved in RNA metabolism                                                                                                                                | 1                                      |   |    |    |         | 1       | 0.546   |        |
|                                  |                                                                                                                                   | cgd5_2070                                                                                                         | SPAC694.02. SKI family SFII helicase                                                                                                                                                                       |                                        |   |    | 1  |         | 1       | 12.737  |        |
|                                  |                                                                                                                                   | cgd5_2460                                                                                                         | RNA binding RGG repeats plus RRM domain containing protein                                                                                                                                                 |                                        |   | 1  |    |         | 1       | 4.249   |        |
|                                  |                                                                                                                                   | cgd5_2870                                                                                                         | F11M21.28-like; 3 CCH RNA binding domain protein involved in RNA metabolism                                                                                                                                | 1                                      |   |    |    |         | 1       | 0.346   |        |
|                                  |                                                                                                                                   | cgd5_3870                                                                                                         | yprA. Lhr1/Ski2 family RNA SFII helicase                                                                                                                                                                   | 1                                      |   |    |    |         | 1       | 0.366   |        |
|                                  |                                                                                                                                   | cgd6_3010                                                                                                         | poly(a)-binding protein fabm, putative                                                                                                                                                                     |                                        |   |    |    | 1       | 1       | 480.181 |        |
|                                  |                                                                                                                                   | cgd6_4910                                                                                                         | F11M21.28-like protein with 3 CCCH RNA binding domains, involved in RNA metabolism                                                                                                                         |                                        |   |    |    | 1       | 1       | 482.085 |        |
|                                  |                                                                                                                                   | cgd7_2560                                                                                                         | Sgd1p; NIC plus MI domains containing protein involved in RNA metabolism                                                                                                                                   |                                        |   | 1  |    |         | 1       | 1.845   |        |
|                                  |                                                                                                                                   | cgd7_3510                                                                                                         | helicase, putative                                                                                                                                                                                         |                                        |   | 1  |    |         | 1       | 1.453   |        |
|                                  |                                                                                                                                   | cgd8_1820                                                                                                         | ATP-dependent RNA helicase, putative                                                                                                                                                                       |                                        |   | 1  |    |         | 1       | 5.336   |        |
|                                  |                                                                                                                                   | cgd8_2520                                                                                                         | Mtr4p like SKI family SFII helicase                                                                                                                                                                        |                                        |   |    |    | 1       | 1       | 32.047  |        |
|                                  |                                                                                                                                   | cgd8_3220                                                                                                         | La domain fused to two RRRMs (as in the La autoantigen) which is further fused to a C-terminal domain present in the plant DCL protein and the C-terminus of the alpha subunit of the plant RNA polymerase |                                        |   |    |    | 1       | 1       | 73.442  |        |
|                                  |                                                                                                                                   |                                                                                                                   | <b>RNA binding Total</b>                                                                                                                                                                                   |                                        | 3 | 4  | 5  | 6       | 10      | 28      | 65.921 |
|                                  |                                                                                                                                   | RNA degradation                                                                                                   | cgd2_2090                                                                                                                                                                                                  | mitotic control protein dis3, putative |   |    |    | 1       |         | 1       | 2.745  |
| cgd3_3270                        | possible nucleotide kinase related to CMP and AMP kinases                                                                         |                                                                                                                   |                                                                                                                                                                                                            |                                        |   |    | 1  | 1       | 7.351   |         |        |
| cgd3_350                         | Pop2p-like 3'5' exonuclease, CCR4-NOT transcription complex                                                                       |                                                                                                                   |                                                                                                                                                                                                            |                                        |   |    | 1  | 1       | 12.238  |         |        |

|                  |                        |                                                                                                                         |    |   |    |    |   |    |         |
|------------------|------------------------|-------------------------------------------------------------------------------------------------------------------------|----|---|----|----|---|----|---------|
|                  | cgd3_800               | POP4 like ribonuclease P protein subunit                                                                                |    |   | 1  |    |   | 1  | 3.031   |
|                  | cgd4_1950              | RPR46-like RNase PH domain                                                                                              |    |   | 1  |    |   | 1  | 2.306   |
|                  | cgd4_3930              | archeo-eukaryotic exosomal RNase                                                                                        |    |   |    | 1  |   | 1  | 5.706   |
|                  | cgd6_2080              | Kem1p-like 5'-3' exonuclease                                                                                            |    | 1 |    |    |   | 1  | 1.889   |
|                  | cgd7_230               | RPR45-like archaeo-eukaryotic exosomal RNase PH                                                                         |    |   | 1  |    |   | 1  | 3.742   |
|                  | cgd7_2380              | RRP45-like archaeo-eukaryotic exosomal rnae, PH domain                                                                  |    |   | 1  |    |   | 1  | 3.607   |
|                  | cgd8_2250              | Rat1 Kar1/Rat1 like 5'-3' exonuclease                                                                                   |    |   |    | 1  |   | 1  | 8.608   |
|                  | cgd8_3310              | S. cerevisiae Ylr022cp like protein that has a C2H2 zinc finger and is a component of the exosome                       |    | 1 |    |    |   | 1  | 1.837   |
|                  | cgd8_5150              | ssd1p/F48E8.6-like RNaseII                                                                                              |    |   | 1  |    |   | 1  | 2.723   |
|                  | RNA degradation Total  |                                                                                                                         |    | 2 | 6  | 4  |   | 12 | 4.649   |
| RNA modification | cgd1_1310              | cleavage stimulation factor subunit 2 that has a CSF1 like RRM domain                                                   |    |   |    | 1  |   | 1  | 8.330   |
|                  | cgd1_1720              | tRNA (Gm18) ribose methylase; trm3p; SpoU superfamily - SPOUT methylase                                                 | 1  |   |    |    |   | 1  | 0.455   |
|                  | cgd1_3440              | Dus1p, tRNA dihydrouridine synthase                                                                                     |    | 1 |    |    |   | 1  | 1.984   |
|                  | cgd2_2710              | TrmA RNA methylase                                                                                                      |    |   | 1  |    |   | 1  | 4.826   |
|                  | cgd2_3570              | YjbN-like Dus1p tRNA dihydrouriding synthase Tim barrel                                                                 |    |   |    | 1  |   | 1  | 10.357  |
|                  | cgd2_4300              | Maf protein like, involved in RNA metabolism                                                                            |    |   | 1  |    |   | 1  | 5.300   |
|                  | cgd2_570               | tRNA/rRNA methyltransferase-like protein, putative                                                                      |    |   | 1  |    |   | 1  | 2.499   |
|                  | cgd3_2040              | Cca1p, tRNA adenylyltransferase                                                                                         | 1  |   |    |    |   | 1  | 0.336   |
|                  | cgd3_3500              | Nop12p nucleolar protein, RRM domain                                                                                    |    |   |    | 1  |   | 1  | 2.333   |
|                  | cgd3_4330              | Dbr1p-like RNA lariat debranching enzyme                                                                                | 1  |   |    |    |   | 1  | 0.374   |
|                  | cgd3_450               | Ctl1p-like mRNA capping enzyme beta subunit (polynucleotide 5'-triphosphatase)                                          | 1  |   |    |    |   | 1  | 0.507   |
|                  | cgd4_2830              | Mra1/NEP1 like protein, involved in pre-rRNA processing, adjacent genes putative paralogs                               |    |   |    |    | 1 | 1  | 73.550  |
|                  | cgd4_2840              | Mra1/NEP1 like protein, involved in pre-rRNA processing, adjacent genes putative paralogs                               |    |   |    |    | 1 | 1  | 40.794  |
|                  | cgd4_3250              | Trm1p. N2,N2-dimethylguanosine tRNA methyltransferase                                                                   |    |   |    | 1  |   | 1  | 5.492   |
|                  | cgd4_3740              | Ydr140wp-like HemK family methylase. archaeal-like. RNA methylase                                                       | 1  |   |    |    |   | 1  | 0.283   |
|                  | cgd4_930               | pap1p; poly A polymerase (eukaryotic type)                                                                              |    |   |    | 1  |   | 1  | 2.808   |
|                  | cgd5_1730              | nclp/MJ0026/YebU-like; SUN family methylase                                                                             |    |   |    |    | 1 | 1  | 7.363   |
|                  | cgd5_2390              | GCD10p. RNA methylase                                                                                                   |    |   |    |    | 1 | 1  | 5.960   |
|                  | cgd5_2470              | GCD14 RNA methylase                                                                                                     |    |   |    | 1  |   | 1  | 3.800   |
|                  | cgd5_2880              | C1p1p GTPase. Pre-mRNA cleavage complex protein                                                                         | 1  |   |    |    |   | 1  | 0.443   |
|                  | cgd5_4420              | MJ0710-like (thump + methylase domains). RNA methylase                                                                  |    |   |    | 1  |   | 1  | 4.952   |
|                  | cgd5_520               | MJ1157-like thiouridine synthase (Ploop atpase) plus Zn ribbon. involved in RNA metabolism.                             | 1  |   |    |    |   | 1  | 0.402   |
|                  | cgd6_1230              | GTPase Grc3p-like Pre-mRNA cleavage complex                                                                             |    |   |    | 1  |   | 1  | 3.775   |
|                  | cgd6_1520              | 2-methylthioadenine synthetase; MiaB                                                                                    |    | 1 |    |    |   | 1  | 1.416   |
|                  | cgd6_2010              | YbiN-like RNA methylase (NPPY variety; HemK family)                                                                     | 1  |   |    |    |   | 1  | 0.317   |
|                  | cgd6_2380              | mRNA capping enzyme; RNA guanylyltransferase Ceg1p                                                                      |    | 1 |    |    |   | 1  | 2.241   |
|                  | cgd6_2540              | tRNA delta(2)-isopentenylpyrophosphate transferase, putative                                                            |    |   |    | 1  |   | 1  | 4.034   |
|                  | cgd6_3560              | MJ0041-family pseudouridylate synthase; Zn finger +thump + Psusyn                                                       |    |   |    |    | 1 | 1  | 11.840  |
|                  | cgd6_400               | Pre-mRNA polyadenylation factor                                                                                         |    |   |    | 1  |   | 1  | 3.801   |
|                  | cgd6_410               | Sgn1p-like RRM domain containing protein                                                                                |    |   |    | 1  |   | 1  | 2.895   |
|                  | cgd6_5130              | Trm5 RNA methyltransferase                                                                                              |    |   |    |    | 1 | 1  | 11.827  |
|                  | cgd6_930               | Dim1p-like ERMB/KSGA methylase (dimethyladenosine transferase)                                                          |    |   |    |    | 1 | 1  | 6.579   |
|                  | cgd7_1530              | ART-4 protein; PIN+Zn ribbon domains. involved in RNA metabolism                                                        |    |   |    |    | 1 | 1  | 24.409  |
|                  | cgd7_1630              | Ncl1p/MJ0026/YebU-like. SUN family RNA methylase                                                                        | 1  |   |    |    |   | 1  | 0.380   |
|                  | cgd7_2810              | ortholog of kin17 (RNA metabolism proteins): a family of highly conserved zinc binding C-rich proteins with KOW domains | 1  |   |    |    |   | 1  | 0.515   |
|                  | cgd7_830               | queunine tRNA-ribosyltransferase                                                                                        |    |   |    |    | 1 | 1  | 7.701   |
|                  | cgd8_1100              | NRAP like nucleolar RNA associated protein                                                                              |    | 1 |    |    |   | 1  | 1.586   |
|                  | cgd8_1120              | HBS1 eRFS. GTPase. (RNA metabolism; translation)                                                                        |    |   |    | 1  |   | 1  | 4.375   |
|                  | cgd8_1460              | Sex-lethal interacting like                                                                                             |    |   |    |    | 1 | 1  | 9.297   |
|                  | cgd8_1580              | saccharomyces Yor006cp like protein conserved across euks and archaea                                                   |    |   |    | 1  |   | 1  | 3.079   |
|                  | cgd8_1650              | partner of Nob1; Phn1p; Yor145cp like KH domain containing protein                                                      |    |   |    |    | 1 | 1  | 76.629  |
|                  | cgd8_3660              | RNA 3'-Terminal Phosphate Cyclase-like protein                                                                          |    |   |    |    | 1 | 1  | 8.624   |
|                  | cgd8_4150              | RRM+RGG RNA binding repeats                                                                                             |    |   |    | 1  |   | 1  | 5.751   |
|                  | cgd8_4330              | fibrillarin. RNA methylase                                                                                              |    |   |    |    | 1 | 1  | 106.146 |
|                  | cgd8_460               | cleavage and polyadenylation specificity factor protein, CPSF metallobeta-lactamase                                     | 1  |   |    |    |   | 1  | 0.404   |
|                  | cgd8_510               | Pus1p-like type II pseudouridylate synthase TruA                                                                        |    |   |    | 1  |   | 1  | 3.111   |
|                  | cgd8_5280              | Deg1p-like type II pseudouridylate synthase TruA                                                                        |    | 1 |    |    |   | 1  | 2.186   |
|                  | RNA modification Total |                                                                                                                         | 11 | 5 | 16 | 11 | 4 | 47 | 10.342  |
| RNA splicing     | cgd1_2250              | small nucleolar riboprotein SMD3, SM domain                                                                             |    | 1 |    |    |   | 1  | 2.202   |
|                  | cgd1_2730              | Ro ribonucleoprotein-binding protein 1, RNA binding protein with 3x RRM domains                                         |    |   |    |    | 1 | 1  | 29.012  |
|                  | cgd1_3080              | splicing factor U2AF like SnRNP auxiliary factor large subunit, RRM domain                                              | 1  |   |    |    |   | 1  | 0.335   |
|                  | cgd1_930               | U2 snrnp-specific A' protein                                                                                            |    | 1 |    |    |   | 1  | 1.836   |
|                  | cgd2_1480              | splicing factor U2AF U2 SnRNP auxiliary factor large subunit, RRM domain                                                |    | 1 |    |    |   | 1  | 2.094   |

|                  |                             |                           |                                                                                                                        |           |           |           |           |           |            |                |
|------------------|-----------------------------|---------------------------|------------------------------------------------------------------------------------------------------------------------|-----------|-----------|-----------|-----------|-----------|------------|----------------|
|                  |                             | cgd2_2770                 | U5 small nuclear ribonucleoprotein 200kDA helicase, Pre-mRNA splicing helicase BRR2 2 (RNA helicase plus Sec63 domain) | 1         |           |           |           |           | 1          | 0.397          |
|                  |                             | cgd2_3510                 | Cus1p U2 snRNP protein                                                                                                 |           | 1         |           |           |           | 1          | 1.504          |
|                  |                             | cgd2_740                  | cut up CG6998-PA, putative                                                                                             |           |           | 1         |           |           | 1          | 3.650          |
|                  |                             | cgd3_1060                 | U1 like C2H2 zinc finger                                                                                               | 1         |           |           |           |           | 1          | 0.431          |
|                  |                             | cgd3_1230                 | SPAC14C4.06c-like PWI+4CCCH domains                                                                                    |           |           | 1         |           |           | 1          | 4.723          |
|                  |                             | cgd3_1920                 | possible PRP38 pre-mRNA splicing factor family member                                                                  | 1         |           |           |           |           | 1          | 0.497          |
|                  |                             | cgd3_2110                 | nucleolar protein NOP5/NOP58-like pre-mRNA splicing factor prp31                                                       |           |           |           |           | 1         | 1          | 111.170        |
|                  |                             | cgd3_2880                 | U2 small nuclear ribonucleoprotein A' like LRR repeats                                                                 | 1         |           |           |           |           | 1          | 0.569          |
|                  |                             | cgd3_3690                 | U5 snRNP 100 kD protein, putative                                                                                      |           |           | 1         |           |           | 1          | 2.353          |
|                  |                             | cgd3_3880                 | Snu114p GTPase, U5 snRNP-specific protein, 116 kDa                                                                     |           |           |           | 1         |           | 1          | 15.924         |
|                  |                             | cgd4_150                  | pre-mRNA splicing protein; Prp31p-like                                                                                 |           | 1         |           |           |           | 1          | 2.225          |
|                  |                             | cgd4_270                  | 30 kDa splicing factor, SPF 30, tudor domain containing protein                                                        |           |           |           | 1         |           | 1          | 5.659          |
|                  |                             | cgd4_3190                 | small nuclear ribonucleoprotein                                                                                        |           |           | 1         |           |           | 1          | 3.633          |
|                  |                             | cgd5_1330                 | SPAC25G10.01-like RRM domain containing protein                                                                        |           |           |           |           | 1         | 1          | 329.994        |
|                  |                             | cgd5_1740                 | conserved protein, possible U4/U6 associated RNA splicing factor                                                       | 1         |           |           |           |           | 1          | 0.490          |
|                  |                             | cgd5_1760                 | small nucleolar RNP protein, Gar1 protein RNA binding region                                                           |           |           |           |           | 1         | 1          | 31.331         |
|                  |                             | cgd5_2220                 | small nuclear ribonucleoprotein D1. SM domain containing protein                                                       |           | 1         |           |           |           | 1          | 2.190          |
|                  |                             | cgd5_2960                 | U5snrp Brr2 SFII RNA helicase (sec63 and the second part of the RNA                                                    |           |           | 1         |           |           | 1          | 5.387          |
|                  |                             | cgd5_3710                 | small nuclear ribonucleoprotein U6                                                                                     |           |           | 1         |           |           | 1          | 2.410          |
|                  |                             | cgd5_4090                 | DHR1/Ecm16p/kurz. HrpA family SFII helicase                                                                            |           |           | 1         |           |           | 1          | 2.720          |
|                  |                             | cgd5_700                  | musashi. RRM domain containing protein, splicing related                                                               |           |           |           |           | 1         | 1          | 52.477         |
|                  |                             | cgd5_920                  | Pre-mRNA splicing factor Pro1/Prp6. HAT repeat protein                                                                 |           |           |           | 1         |           | 1          | 5.868          |
|                  |                             | cgd6_1410                 | pre-mRNA splicing factor ATP-dependent RNA helicase, putative                                                          |           |           | 1         |           |           | 1          | 5.044          |
|                  |                             | cgd6_1680                 | splicing factor U2AF U2 snRNP auxiliary factor large subunit; 3 RRM domains                                            | 1         |           |           |           |           | 1          | 0.420          |
|                  |                             | cgd6_2150                 | U1 snrnp, putative                                                                                                     |           |           |           | 1         |           | 1          | 13.022         |
|                  |                             | cgd6_2830                 | splicing factor 3a 66kD; N-terminus C2H2 domain                                                                        | 1         |           |           |           |           | 1          | 0.531          |
|                  |                             | cgd6_3850                 | HOI-POLLOI protein; U4/U6.U5 snRNP component; Snu13p; pelota RNA binding domain containing protein                     |           |           |           |           | 1         | 1          | 494.940        |
|                  |                             | cgd6_4490                 | U2 snRNP. Hsh49p, RRM domain containing protein                                                                        | 1         |           |           |           |           | 1          | 0.389          |
|                  |                             | cgd6_4670                 | Prp9p-like splicing factor 3a subunit 3 snRNP. C-terminal C2H2                                                         |           |           | 1         |           |           | 1          | 4.092          |
|                  |                             | cgd6_4710                 | 5x RRM. Mrd1p like, splicing related                                                                                   |           |           |           |           | 1         | 1          | 48.769         |
|                  |                             | cgd6_4750                 | splicing factor 3B subunit1-like HEAT repeat containing protein                                                        | 1         |           | 1         |           |           | 2          | 1.965          |
|                  |                             | cgd6_990                  | U1 snrnp Snp1p. RRM domain containing protein                                                                          |           |           |           | 1         |           | 1          | 6.729          |
|                  |                             | cgd7_1070                 | snRNP core protein                                                                                                     |           | 1         |           |           |           | 1          | 1.994          |
|                  |                             | cgd7_1750                 | step II splicing factor SLU7, putative                                                                                 |           | 1         |           |           |           | 1          | 2.254          |
|                  |                             | cgd7_2040                 | small nuclear ribonucleo protein                                                                                       |           |           |           |           | 1         | 1          | 40.264         |
|                  |                             | cgd7_2160                 | Pre-mRNA splicing factor SF3a. 2xSWAP domain protein                                                                   |           | 1         |           |           |           | 1          | 1.790          |
|                  |                             | cgd7_3610                 | RPR domain protein (involved in RNA metabolism)                                                                        |           | 1         |           |           |           | 1          | 1.394          |
|                  |                             | cgd7_3960                 | pleiotropic regulator 1 (spliceosome/RNA splicing)                                                                     |           |           | 1         |           |           | 1          | 3.349          |
|                  |                             | cgd7_4580                 | U6 snRNA-associated Sm-like protein LSm5. SM domain                                                                    |           |           |           |           | 1         | 1          | 27.760         |
|                  |                             | cgd7_5220                 | splicing factor with 3 RRM domains                                                                                     |           |           | 1         |           |           | 1          | 2.318          |
|                  |                             | cgd7_5230                 | possible D-Tyr-tRNA <sup>tyr</sup> deacylase                                                                           |           | 1         |           |           |           | 1          | 1.549          |
|                  |                             | cgd7_5490                 | PRP18 (SFM+PRP18 domains)                                                                                              |           |           |           | 1         |           | 1          | 21.072         |
|                  |                             | cgd7_640                  | Prp16p pre-mRNA splicing factor. HrpA family SFII helicase                                                             |           |           |           | 1         |           | 1          | 13.492         |
|                  |                             | cgd7_690                  | small nuclear ribonucleoprotein                                                                                        |           |           | 1         |           |           | 1          | 4.467          |
|                  |                             | cgd7_940                  | splicing factor RRM domain containing protein; T22E16.120 SC35-like splicing factor                                    |           |           |           |           | 1         | 1          | 871.806        |
|                  |                             | cgd8_1480                 | RPR domain containing protein, present in proteins involved in mRNA splicing                                           |           |           |           |           | 1         | 1          | 33.306         |
|                  |                             | cgd8_190                  | Mak5 pre-mRNA splicing RNA SFII helicase                                                                               |           |           |           | 1         |           | 1          | 22.297         |
|                  |                             | cgd8_1950                 | shares a domain with a conserved HREF motif with the CWF15 protein that is involved in mRNA splicing                   |           | 1         |           |           |           | 1          | 1.842          |
|                  |                             | cgd8_3340                 | PWI domain containing protein that is typically seen in spliceosomal proteins                                          |           |           |           | 1         |           | 1          | 20.209         |
|                  |                             | cgd8_3370                 | splicing factor SRP40 like 2x RRM domains                                                                              |           | 1         |           |           |           | 1          | 1.666          |
|                  |                             | cgd8_3690                 | mitosis protein DIM1                                                                                                   |           |           | 1         |           |           | 1          | 4.316          |
|                  |                             | cgd8_4100                 | PRP43 involved in spliceosome disassembly mRNA splicing                                                                |           |           | 1         |           |           | 1          | 2.591          |
|                  |                             | cgd8_5240                 | U2AG splicing factor U2AF U2snRNP auxiliary factor small subunit CCCh+RRM+CCCh-like                                    | 1         |           |           |           |           | 1          | 0.444          |
|                  |                             | <b>RNA splicing Total</b> |                                                                                                                        | <b>11</b> | <b>13</b> | <b>15</b> | <b>9</b>  | <b>11</b> | <b>59</b>  | <b>38.629</b>  |
|                  | <b>Rnase</b>                | cgd1_980                  | RNase L inhibitor-like protein                                                                                         |           |           |           | 1         |           | 1          | 12.043         |
|                  |                             | cgd5_100                  | RRPp/PMC2 like exosome 3'-5' exoribonuclease subunit with an RNaseD domain and an HRDc domain                          |           |           |           | 1         |           | 1          | 17.426         |
|                  |                             | cgd6_1040                 | RNase P Rpr2/Rpp21 subunit domain                                                                                      |           |           |           | 1         |           | 1          | 12.210         |
|                  | <b>Rnase Total</b>          |                           |                                                                                                                        |           |           |           | <b>3</b>  |           | <b>3</b>   | <b>13.893</b>  |
|                  | <b>tRNA synthesis</b>       | cgd8_4870                 | tRNA synthetase class II, putative                                                                                     |           |           |           |           | 1         | 1          | 117.491        |
|                  | <b>tRNA synthesis Total</b> |                           |                                                                                                                        |           |           |           |           | <b>1</b>  | <b>1</b>   | <b>117.491</b> |
|                  | <b>RNA metabolism Total</b> |                           |                                                                                                                        | <b>25</b> | <b>24</b> | <b>42</b> | <b>33</b> | <b>26</b> | <b>150</b> | <b>32.173</b>  |
| <b>Structure</b> | <b>Cytoskeleton</b>         | cgd1_1540                 | dynein intermediate chain                                                                                              |           |           | 1         |           |           | 1          | 3.460          |
|                  |                             | cgd1_2430                 | ARP3 actin related protein                                                                                             |           | 1         |           |           |           | 1          | 1.667          |
|                  |                             | cgd1_2530                 | TRAFAC type P-loop GTPase that may be related to kinesin                                                               |           | 1         |           |           |           | 1          | 1.835          |
|                  |                             | cgd1_2740                 | centromere/kinetochore protein                                                                                         |           | 1         |           |           |           | 1          | 2.215          |

|  |                        |                           |                                                                                                               |           |           |          |          |          |           |               |
|--|------------------------|---------------------------|---------------------------------------------------------------------------------------------------------------|-----------|-----------|----------|----------|----------|-----------|---------------|
|  |                        | cgd1_3460                 | F-actin capping protein, beta subunit                                                                         | 1         |           |          |          |          | 1         | 0.363         |
|  |                        | cgd1_3570                 | myosin regulatory light chain                                                                                 |           |           |          |          | 1        | 1         | 7.894         |
|  |                        | cgd1_920                  | actin                                                                                                         |           | 1         |          |          |          | 1         | 1.558         |
|  |                        | cgd2_1430                 | dynactin subunit p62, putative                                                                                | 1         |           |          |          |          | 1         | 0.387         |
|  |                        | cgd2_4150                 | articulin family protein                                                                                      |           | 1         |          |          |          | 1         | 1.771         |
|  |                        | cgd3_140                  | b-tubulin specific chaparone                                                                                  | 1         |           |          |          |          | 1         | 0.344         |
|  |                        | cgd3_2120                 | myosin fused to 3 IQ motifs (that interact with calmodulin) and Rcc1 domain                                   |           |           |          | 1        |          | 1         | 2.251         |
|  |                        | cgd3_2590                 | kinesin-related protein K2                                                                                    | 1         |           |          |          |          | 1         | 0.302         |
|  |                        | cgd3_3650                 | centrin like EF hand protein                                                                                  | 1         |           |          |          |          | 1         | 0.520         |
|  |                        | cgd4_2860                 | alpha tubulin                                                                                                 |           |           |          | 1        |          | 1         | 2.574         |
|  |                        | cgd4_3290                 | articulin family protein, adjacent paralogous gene                                                            |           | 1         |          |          |          | 1         | 1.613         |
|  |                        | cgd4_3300                 | articulin family protein, adjacent paralogous gene                                                            |           |           |          | 1        |          | 1         | 4.038         |
|  |                        | cgd5_1320                 | actin-like protein, putative                                                                                  |           |           |          | 1        |          | 1         | 1.832         |
|  |                        | cgd5_2330                 | actin-like                                                                                                    | 1         |           |          |          |          | 1         | 0.394         |
|  |                        | cgd5_2800                 | actin depolymerizing factor                                                                                   |           |           |          |          | 1        | 1         | 122.394       |
|  |                        | cgd5_3160                 | actin                                                                                                         |           |           |          |          | 1        | 1         | 475.922       |
|  |                        | cgd5_4080                 | articulin family protein                                                                                      | 1         |           |          |          |          | 1         | 0.470         |
|  |                        | cgd5_60                   | centrin like protein with 4x EF hands                                                                         | 1         |           |          |          |          | 1         | 0.609         |
|  |                        | cgd5_640                  | articulin family protein                                                                                      |           |           |          | 1        |          | 1         | 4.728         |
|  |                        | cgd6_1900                 | kinesin heavy chain, putative                                                                                 |           |           |          |          | 1        | 1         | 13.879        |
|  |                        | cgd6_1920                 | putative kinesin heavy chain                                                                                  | 1         |           |          |          |          | 1         | 0.285         |
|  |                        | cgd6_3370                 | microtubule-associated protein                                                                                |           |           |          |          | 1        | 1         | 35.773        |
|  |                        | cgd6_3410                 | tubulin, gamma tubulin complex protein 3                                                                      | 1         |           |          |          |          | 1         | 0.315         |
|  |                        | cgd6_4150                 | formin-related protein, putative                                                                              |           | 1         |          |          |          | 1         | 2.108         |
|  |                        | cgd6_4210                 | kinesin-like boursin, putative                                                                                |           |           |          |          | 1        | 1         | 10.185        |
|  |                        | cgd6_4340                 | myosin-related protein, putative                                                                              |           |           |          | 1        |          | 1         | 2.314         |
|  |                        | cgd6_4560                 | myosin'myosin'                                                                                                |           |           |          |          | 1        | 1         | 10.295        |
|  |                        | cgd6_4760                 | tubulin beta chain                                                                                            | 1         |           |          |          |          | 1         | 0.407         |
|  |                        | cgd7_1660                 | STOP repeat protein involved in microtubule stabilization (possible variant metal binding site at N-terminus) |           |           |          | 1        |          | 1         | 1.572         |
|  |                        | cgd7_1980                 | gamma tubulin                                                                                                 | 1         |           |          |          |          | 1         | 0.404         |
|  |                        | cgd7_2210                 | kinesin-like protein                                                                                          |           |           |          |          | 1        | 1         | 12.644        |
|  |                        | cgd7_2370                 | EB1 like microtubule binding protein                                                                          | 1         |           |          |          |          | 1         | 0.503         |
|  |                        | cgd7_3060                 | gamma-tubulin complex associated protein                                                                      |           |           |          | 1        |          | 1         | 1.624         |
|  |                        | cgd7_3330                 | Ced12 family of proteins that are conserved throughout eukaryotes                                             |           |           |          | 1        |          | 1         | 1.839         |
|  |                        | cgd7_3790                 | unconventional myosin                                                                                         |           |           |          |          | 1        | 1         | 293.367       |
|  |                        | cgd7_4090                 | alpha superhelical protein, divergent TPR like repeats, possible microtubule associated protein               |           |           |          |          |          | 1         | 1.203         |
|  |                        | cgd7_4350                 | myosin'unconventional myosin fused to an RCC1 domain (unique)'                                                |           |           |          | 1        |          | 1         | 2.722         |
|  |                        | cgd8_1070                 | actin                                                                                                         | 1         |           |          |          |          | 1         | 0.434         |
|  |                        | cgd8_1280                 | centrin, caltractin                                                                                           | 1         |           |          |          |          | 1         | 0.545         |
|  |                        | cgd8_1980                 | actin-related protein Arp23 like WD 40 repeate protein                                                        | 1         |           |          |          |          | 1         | 0.299         |
|  |                        | cgd8_2200                 | BRG1/brm-associated factor 53A like actin                                                                     |           |           |          | 1        |          | 1         | 1.359         |
|  |                        | cgd8_2450                 | formin homology 2 domain (FH2) protein                                                                        |           |           |          | 1        |          | 1         | 1.720         |
|  |                        | cgd8_3300                 | centromere associated Kip3p, kinesin like P-loop NTPase that belongs to the TRAFAC class GTPase superfamily   |           |           |          |          | 1        | 1         | 7.440         |
|  |                        | cgd8_4120                 | caltractin (centrin)-like, contains 3x EFh domains                                                            | 1         |           |          |          |          | 1         | 0.404         |
|  |                        | cgd8_500                  | caltractin, centrin                                                                                           |           |           |          |          | 1        | 1         | 3.538         |
|  |                        | cgd8_5030                 | articulin family protein, Pfs77 protein-related                                                               |           |           |          | 1        |          | 1         | 2.483         |
|  |                        | cgd8_710                  | myosin heavy chain                                                                                            | 1         |           |          |          |          | 1         | 0.351         |
|  |                        | <b>Cytoskeleton Total</b> |                                                                                                               | <b>18</b> | <b>15</b> | <b>8</b> | <b>6</b> | <b>4</b> | <b>51</b> | <b>20.572</b> |
|  | <b>Oocyst wall</b>     | cgd4_3090                 | oocyst wall protein 6                                                                                         |           |           |          | 1        |          | 1         | 5.214         |
|  |                        | cgd6_200                  | oocyst wall protein 8                                                                                         |           |           |          |          | 1        | 1         | 19.890        |
|  |                        | cgd6_2090                 | CpCOWP1, oocyst wall protein with type I and type II cysteine-rich repeats                                    |           |           |          |          | 1        | 1         | 19.920        |
|  |                        | cgd7_1800                 | oocyst wall protein 2                                                                                         | 1         |           |          |          |          | 1         | 0.390         |
|  |                        | cgd8_3350                 | oocyst wall protein 4                                                                                         |           |           |          |          |          | 1         | 1.637         |
|  |                        | <b>Oocyst wall Total</b>  |                                                                                                               | <b>1</b>  | <b>1</b>  | <b>1</b> | <b>2</b> |          | <b>5</b>  | <b>9.410</b>  |
|  | <b>Structure Total</b> |                           |                                                                                                               | <b>19</b> | <b>16</b> | <b>9</b> | <b>8</b> | <b>4</b> | <b>56</b> | <b>19.575</b> |
|  | <b>Transporter</b>     | ABC                       |                                                                                                               |           |           |          |          |          |           |               |
|  |                        | cgd1_1350                 | ATM1-like ABC transporter with 6 transmembrane domains                                                        | 1         |           |          |          |          | 1         | 0.410         |
|  |                        | cgd1_700                  | ATP-binding cassette protein                                                                                  |           |           |          |          | 1        | 1         | 12.399        |
|  |                        | cgd2_3870                 | putative ABC transporter with 2x AAA and 11+ transmembrane domains                                            | 1         |           |          |          |          | 1         | 0.357         |
|  |                        | cgd2_70                   | ABC transporter, with 12 x transmembrane domains and 2x AAA domains                                           |           |           |          |          |          | 1         | 39.530        |
|  |                        | cgd2_80                   | ABC transporter family protein, 2x AAA domain                                                                 |           |           |          | 1        |          | 1         | 2.792         |
|  |                        | cgd2_90                   | ABC transporter with 9x transmembrane domains and 2xAAA                                                       |           |           |          |          |          | 1         | 38.365        |
|  |                        | cgd3_410                  | putative ABC transporter, 12x transmembrane domains plus 2x AAA                                               |           |           |          |          |          | 1         | 89.437        |
|  |                        | cgd3_690                  | ABC transporter                                                                                               | 1         |           |          |          |          | 1         | 0.561         |
|  |                        | cgd4_1370                 | possible ABC transporter with 11 transmembrane domains, AAA domain                                            |           |           |          |          |          | 1         | 32.291        |
|  |                        | cgd4_1380                 | possible ABC transporter with two AAA domains and 14 transmembrane regions                                    |           |           |          | 1        |          | 1         | 1.577         |
|  |                        | cgd6_5260                 | ABC transporter ATPase with 2 AAA domains                                                                     | 1         |           |          |          |          | 1         | 0.398         |
|  |                        | cgd6_5350                 | putative ABC transporter protein                                                                              | 1         |           |          |          |          | 1         | 0.391         |

|                         |           |                                                                                                                                |   |   |   |   |   |    |         |
|-------------------------|-----------|--------------------------------------------------------------------------------------------------------------------------------|---|---|---|---|---|----|---------|
|                         | cgd6_5450 | ABC transporter, AAA domain                                                                                                    |   | 1 |   |   |   | 1  | 1.474   |
|                         | cgd7_2730 | ABC transporter with ATPase domain plus 3 transmembrane regions                                                                |   | 1 |   |   |   | 1  | 1.561   |
|                         | cgd7_4510 | ATP-binding cassette, sub-family C (CFTR/MRP), member 2; Canalicular multispecific organic anion transporter; multidrug resist |   |   |   |   | 1 | 1  | 215.298 |
|                         | cgd7_4520 | ABC ATPase (2 ABC domains) with 10 transmembrane domains, adjacent duplicated gene                                             |   |   |   |   | 1 | 1  | 59.214  |
|                         | cgd7_4800 | ABC transporter, amino acid transporter 12 transmembrane spanning subunit                                                      |   |   |   | 1 |   | 1  | 5.654   |
|                         | cgd8_3250 | ABC1 like protein kinase                                                                                                       |   |   | 1 |   |   | 1  | 3.306   |
| ABC Total               |           |                                                                                                                                | 5 | 3 | 2 | 2 | 6 | 18 | 28.056  |
| Ion                     | cgd1_2190 | K+/H+ antiporter of possible bacterial origin, signal peptide                                                                  | 1 |   |   |   |   | 1  | 0.314   |
|                         | cgd1_2620 | calcium antiporter, Na/Ca exchange associated membrane protein with 11 transmembrane domains                                   |   |   |   |   | 1 | 1  | 48.636  |
|                         | cgd1_3050 | cation diffusion facilitator like membrane protein transporter, 6x transmembrane domains                                       | 1 |   |   |   |   | 1  | 0.441   |
|                         | cgd2_2680 | possible MgtA, cation transport ATPase, signal peptide, 12 transmembrane domains                                               |   |   | 1 |   |   | 1  | 3.968   |
|                         | cgd3_2730 | protein with 10 transmembrane domains, possible calcium transporting ATPase or aminophospholipid transporter                   | 1 |   |   |   |   | 1  | 0.343   |
|                         | cgd3_3520 | putative sodium/calcium cation exchanger having 12 transmembrane domains and signal peptide                                    |   |   |   | 1 |   | 1  | 25.496  |
|                         | cgd4_1470 | vacuolar proton translocating ATPase with 7 transmembrane regions near C-terminus                                              |   |   |   |   | 1 | 1  | 33.580  |
|                         | cgd6_130  | possible Na+/H+ and K+/H+ antiporter with 12 transmembrane domains, duplicated adjacent gene                                   |   |   | 1 |   |   | 1  | 4.089   |
|                         | cgd6_140  | possible Na+/H+ and K+/H+ antiporter with 12 transmembrane domains, duplicated adjacent gene                                   |   |   |   |   | 1 | 1  | 99.176  |
|                         | cgd7_4070 | arsenical pump-driving ATPase                                                                                                  | 1 |   |   |   |   | 1  | 0.378   |
|                         | cgd7_4190 | cation-transporting P-type ATPase with 11 or more transmembrane domains                                                        |   |   |   | 1 |   | 1  | 9.950   |
|                         | cgd7_90   | high affinity sulfate transporter-related                                                                                      |   |   | 1 |   |   | 1  | 2.295   |
|                         | cgd8_2090 | cation-transporting ATPase 2 with 8 transmembrane domains                                                                      |   |   |   | 1 |   | 1  | 15.144  |
| Ion Total               |           |                                                                                                                                | 4 |   | 3 | 3 | 3 | 13 | 18.755  |
| MFS                     | cgd2_1450 | major facilitator superfamily protein, putative, 12 transmembrane domain                                                       | 1 |   |   |   |   | 1  | 0.294   |
|                         | cgd7_3450 | major facilitator (MFS) superfamily transporter containing 12 transmembrane domains                                            |   |   |   | 1 |   | 1  | 7.739   |
| MFS Total               |           |                                                                                                                                | 1 |   |   | 1 |   | 2  | 4.016   |
| Nuclear transport       | cgd3_2360 | putative nucleoporin, FG-rich motifs within N-terminal region                                                                  |   | 1 |   |   |   | 1  | 1.722   |
|                         | cgd3_300  | rasputin. nuclear transport factor 2 (NTF2) domain plus RRM domain                                                             | 1 |   |   |   |   | 1  | 0.399   |
|                         | cgd3_3060 | putative exportin 1                                                                                                            |   |   | 1 |   |   | 1  | 2.438   |
|                         | cgd5_3950 | Ran-binding protein                                                                                                            |   | 1 |   |   |   | 1  | 2.101   |
|                         | cgd6_4610 | mRNA export protein, putative                                                                                                  |   |   |   | 1 |   | 1  | 7.614   |
|                         | cgd7_1670 | nuclear pore protein RBP16/17 (RAN binding protein 16/17)                                                                      |   |   |   | 1 |   | 1  | 8.334   |
|                         | cgd7_1780 | tRNA exportin type nuclear export protein                                                                                      |   |   |   |   | 1 | 1  | 25.649  |
|                         | cgd7_1970 | nuclear pore associated protein (NLP4) with N-terminal ubiquitin domain                                                        | 1 |   |   |   |   | 1  | 0.559   |
|                         | cgd7_220  | GTP-binding nuclear protein ran/tc4                                                                                            |   |   |   |   | 1 | 1  | 59.764  |
|                         | cgd7_3030 | importin/karyopherin                                                                                                           | 1 |   |   |   |   | 1  | 0.527   |
|                         | cgd7_3270 | importin/karyopherin (Arm repeats)                                                                                             |   |   |   |   | 1 | 1  | 32.072  |
|                         | cgd8_2100 | RAN binding domain                                                                                                             |   |   |   | 1 |   | 1  | 21.037  |
|                         | cgd8_2210 | RCC1 like beta propeller protein [The regulator of chromosome condensation (RCC1), interact with Ran GTPase]                   | 1 |   |   |   |   | 1  | 0.353   |
|                         | cgd8_3260 | importin alpha subunit                                                                                                         |   | 1 |   |   |   | 1  | 1.551   |
|                         | cgd8_3440 | importin beta like ARM repeat alpha superhelix                                                                                 |   |   | 1 |   |   | 1  | 2.939   |
| Nuclear transport Total |           |                                                                                                                                | 4 | 3 | 2 | 3 | 3 | 15 | 11.137  |
| Nutrient                | cgd1_40   | UDP-galactose transporter, predicted signal peptide and 9 transmembrane domains                                                | 1 |   |   |   |   | 1  | 0.448   |
|                         | cgd1_600  | oxoglutarate/malate translocator protein                                                                                       |   |   |   | 1 |   | 1  | 10.621  |
|                         | cgd2_2400 | ATPase, class II, type 9B, putative                                                                                            |   |   |   | 1 |   | 1  | 18.081  |
|                         | cgd2_2660 | UDP N-acetylglucosamine transporter-like nucleotide sugar transporter with 10 transmembrane domains                            |   |   |   |   | 1 | 1  | 153.274 |
|                         | cgd2_2670 | UDP N-acetylglucosamine transporter-like nucleotide sugar transporter with 10 transmembrane domains                            |   |   |   |   | 1 | 1  | 53.888  |
|                         | cgd2_310  | nucleoside transporter, 10 transmembrane domain domain, nucleoside binding domain                                              |   |   |   |   | 1 | 1  | 69.085  |
|                         | cgd2_590  | nucleotide-sugar transporter, UDP N-acetylglucosamine-like, signal peptide, 9 or more transmembrane domains                    | 1 |   |   |   |   | 1  | 0.363   |
|                         | cgd3_1610 | protein containing a possible START(Steroidogenic acute regulatory (STAR) related lipid transfer) domain                       |   |   |   | 1 |   | 1  | 10.286  |
|                         | cgd3_3100 | 12 transmembrane domain protein MFS family sugar transporter                                                                   |   |   | 1 |   |   | 1  | 5.019   |
|                         | cgd3_4070 | putative sugar transporter with 12 transmembrane domains                                                                       |   |   |   |   | 1 | 1  | 34.775  |
|                         | cgd3_490  | putative fucose translocator with 8 transmembrane domains, within locus of 3 paralogous genes                                  |   | 1 |   |   |   | 1  | 2.022   |
|                         | cgd3_500  | putative fucose translocator with 8 transmembrane domains, within locus of 3 paralogous genes                                  |   |   |   |   | 1 | 1  | 32.577  |
|                         | cgd3_510  | putative fucose translocator with 8 transmembrane domains, within locus of 3 paralogous genes                                  |   |   |   |   | 1 | 1  | 398.701 |
|                         | cgd4_2770 | 11 transmembrane domain protein, possible aa transporter                                                                       |   |   |   |   | 1 | 1  | 51.906  |

|  |                            |           |                                                                                                                        |                                                                                                                                                             |           |           |           |           |           |               |
|--|----------------------------|-----------|------------------------------------------------------------------------------------------------------------------------|-------------------------------------------------------------------------------------------------------------------------------------------------------------|-----------|-----------|-----------|-----------|-----------|---------------|
|  |                            | cgd4_2870 | putative sugar transporter, 12x transmembrane domain protein                                                           |                                                                                                                                                             |           |           | 1         |           | 1         | 14.544        |
|  |                            | cgd4_80   | Sac1p family protein                                                                                                   |                                                                                                                                                             |           |           | 1         |           | 1         | 11.114        |
|  |                            | cgd5_1140 | cinnamyl-alcohol dehydrogenase-like nucleoside diphosphate sugar epimerase                                             | 1                                                                                                                                                           |           |           |           |           | 1         | 0.521         |
|  |                            | cgd5_3410 | possible phosphate/phosphoenolpyruvate translocator with 9 transmembrane domains                                       | 1                                                                                                                                                           |           |           |           |           | 1         | 0.324         |
|  |                            | cgd6_2020 | BT1 family protein (biopterin transporter 1)                                                                           | 1                                                                                                                                                           |           |           |           |           | 1         | 0.611         |
|  |                            | cgd8_1370 | DP-fucose transporter with 9 transmembrane domains                                                                     | 1                                                                                                                                                           |           |           |           |           | 1         | 0.358         |
|  |                            | cgd8_1440 | nucleotide sugar transporter like integral membrane protein with 9 transmembrane domains                               |                                                                                                                                                             |           | 1         |           |           | 1         | 1.327         |
|  |                            | cgd8_1600 | sugar phosphate permease with 11 transmembrane domains                                                                 |                                                                                                                                                             |           |           | 1         |           | 1         | 3.082         |
|  |                            | cgd8_3640 | niemann-Pick type C1 disease protein/ patched like cholesterol transporter of the SecD family, 12 transmembrane domain |                                                                                                                                                             |           | 1         |           |           | 1         | 1.870         |
|  |                            | cgd8_3740 | Yer119cp like amino acid transporter, 11 transmembrane domain                                                          |                                                                                                                                                             |           |           |           | 1         | 1         | 87.487        |
|  |                            | cgd8_80   | 10 transmembrane domain, possible aa transporter                                                                       |                                                                                                                                                             |           |           |           | 1         | 1         | 27.209        |
|  | <b>Nutrient Total</b>      |           |                                                                                                                        | <b>6</b>                                                                                                                                                    | <b>3</b>  | <b>2</b>  | <b>5</b>  | <b>9</b>  | <b>25</b> | <b>39.580</b> |
|  | <b>P-type ATPase</b>       | cgd3_1110 | P-type ATPase fused to two adenylyl cyclase domains and 21 predicted transmembrane regions                             | 1                                                                                                                                                           |           |           |           |           | 1         | 0.286         |
|  |                            | cgd3_4140 | P-type ATPase3, 13 transmembrane regions                                                                               |                                                                                                                                                             |           |           | 1         |           | 1         | 17.025        |
|  |                            | cgd4_2720 | P-type ATPase involved in cation transport                                                                             |                                                                                                                                                             |           | 1         |           |           | 1         | 3.238         |
|  |                            | cgd7_1760 | P-type ATPase (calcium/phospholipid-transporter), 9 transmembrane domains                                              |                                                                                                                                                             |           | 1         |           |           | 1         | 1.619         |
|  | <b>P-type ATPase Total</b> |           |                                                                                                                        | <b>1</b>                                                                                                                                                    | <b>1</b>  | <b>1</b>  | <b>1</b>  |           | <b>4</b>  | <b>5.542</b>  |
|  | <b>Undefined</b>           | cgd4_3110 | 10 transmembrane domain protein, possible translocator                                                                 | 1                                                                                                                                                           |           |           |           |           | 1         | 0.571         |
|  |                            | cgd4_4050 | putative transporter with signal peptide and 12 transmembrane domains                                                  |                                                                                                                                                             |           | 1         |           |           | 1         | 2.012         |
|  |                            | cgd5_1570 | YIP1 protein like transporter GTPase interacting factor having 5 transmembrane domain                                  |                                                                                                                                                             |           | 1         |           |           | 1         | 1.932         |
|  |                            | cgd5_3580 | putative transport protein                                                                                             |                                                                                                                                                             |           |           | 1         |           | 1         | 9.507         |
|  |                            | cgd5_3590 | putative transport protein                                                                                             |                                                                                                                                                             |           | 1         |           |           | 1         | 3.503         |
|  |                            | cgd6_4890 | transporter protein with conserved Zn ribbon C11C7CxxC                                                                 |                                                                                                                                                             |           |           | 1         |           | 1         | 5.637         |
|  |                            | cgd6_490  | zinc ZIP transporter protein, putative                                                                                 |                                                                                                                                                             |           |           | 1         |           | 1         | 5.787         |
|  |                            | cgd7_3290 | clef lip and palate family of eukaryotic membrane proteins (potential transporters) with 9 transmembrane domains       |                                                                                                                                                             |           | 1         |           |           | 1         | 2.945         |
|  |                            | cgd7_4290 | membrane associated transporter, 10 transmembrane domain                                                               |                                                                                                                                                             |           |           |           | 1         | 1         | 53.911        |
|  | <b>Undefined Total</b>     |           |                                                                                                                        | <b>1</b>                                                                                                                                                    | <b>2</b>  | <b>2</b>  | <b>3</b>  | <b>1</b>  | <b>9</b>  | <b>9.534</b>  |
|  | <b>V-ATPase</b>            | cgd1_520  | vacuolar ATP synthetase subunit                                                                                        |                                                                                                                                                             |           |           |           | 1         | 1         | 88.252        |
|  |                            | cgd1_540  | vacuolar ATP synthase subunit, possible signal peptide                                                                 |                                                                                                                                                             |           |           |           | 1         | 1         | 47.341        |
|  |                            | cgd2_3960 | vacuolar ATP synthase subunit 54kD                                                                                     |                                                                                                                                                             |           |           | 1         |           | 1         | 9.850         |
|  |                            | cgd4_540  | putative vacuolar ATP synthase subunit C                                                                               |                                                                                                                                                             |           |           | 1         |           | 1         | 9.712         |
|  |                            | cgd5_3340 | putative vacuolar ATP synthase subunit d                                                                               |                                                                                                                                                             |           |           |           | 1         | 1         | 60.151        |
|  |                            | cgd5_530  | vacuolar H-ATPase subunit D                                                                                            |                                                                                                                                                             |           |           |           | 1         | 1         | 33.137        |
|  |                            | cgd5_850  | vacuolar ATP synthase subunit F                                                                                        |                                                                                                                                                             |           |           |           | 1         | 1         | 67.741        |
|  |                            | cgd7_5000 | vacuolar ATP synthase subunit A                                                                                        |                                                                                                                                                             |           |           | 1         |           | 1         | 12.560        |
|  |                            | cgd8_1670 | vacuolar ATP synthase subunit B                                                                                        |                                                                                                                                                             |           | 1         |           |           | 1         | 3.837         |
|  |                            | cgd8_360  | putative vacuolar ATP synthase subunit E                                                                               |                                                                                                                                                             |           |           |           | 1         | 1         | 61.054        |
|  |                            | cgd8_4790 | proteolipid subunit of the vacuolar ATPase                                                                             |                                                                                                                                                             |           |           | 1         |           | 1         | 11.382        |
|  | <b>V-ATPase Total</b>      |           |                                                                                                                        |                                                                                                                                                             |           | <b>1</b>  | <b>4</b>  | <b>6</b>  | <b>11</b> | <b>36.820</b> |
|  | <b>Transporter Total</b>   |           |                                                                                                                        | <b>22</b>                                                                                                                                                   | <b>12</b> | <b>13</b> | <b>22</b> | <b>28</b> | <b>97</b> | <b>25.014</b> |
|  | <b>Unknown</b>             | Conserved | cgd1_1050                                                                                                              | conserved hypothetical protein                                                                                                                              |           |           | 1         |           | 1         | 3.063         |
|  |                            |           | cgd1_1130                                                                                                              | conserved hypothetical protein                                                                                                                              | 1         |           |           |           | 1         | 0.313         |
|  |                            |           | cgd1_1210                                                                                                              | conserved hypothetical protein                                                                                                                              | 1         |           |           |           | 1         | 0.526         |
|  |                            |           | cgd1_140                                                                                                               | conserved hypothetical protein                                                                                                                              |           |           | 1         |           | 1         | 5.432         |
|  |                            |           | cgd1_1550                                                                                                              | conserved hypothetical protein                                                                                                                              | 1         |           |           |           | 1         | 0.443         |
|  |                            |           | cgd1_160                                                                                                               | conserved hypothetical protein                                                                                                                              | 1         |           |           |           | 1         | 0.335         |
|  |                            |           | cgd1_2220                                                                                                              | apicomplexan specific protein                                                                                                                               |           |           | 1         |           | 1         | 4.609         |
|  |                            |           | cgd1_2720                                                                                                              | hypothetical protein with predicted apicomplexan-conserved domain                                                                                           | 1         |           |           |           | 1         | 0.436         |
|  |                            |           | cgd1_2910                                                                                                              | conserved hypothetical protein                                                                                                                              | 1         |           |           |           | 1         | 0.334         |
|  |                            |           | cgd1_3070                                                                                                              | multidomain protein with a conserved eukaryotic domain also present in the human DRIM protein at N- terminus and an archaeal-bacterial domain at C-terminus |           |           |           | 1         | 1         | 27.886        |
|  |                            |           | cgd1_3340                                                                                                              | conserved hypothetical protein                                                                                                                              |           |           | 1         |           | 1         | 6.873         |
|  |                            |           | cgd1_360                                                                                                               | conserved hypothetical protein                                                                                                                              |           |           | 1         |           | 1         | 17.909        |
|  |                            |           | cgd1_3630                                                                                                              | conserved hypothetical protein                                                                                                                              |           |           | 1         |           | 1         | 10.329        |
|  |                            |           | cgd1_3700                                                                                                              | conserved hypothetical protein                                                                                                                              |           |           | 1         |           | 1         | 1.938         |
|  |                            |           | cgd1_3750                                                                                                              | conserved hypothetical protein                                                                                                                              | 1         |           |           |           | 1         | 0.415         |
|  |                            |           | cgd1_380                                                                                                               | conserved hypothetical protein                                                                                                                              | 1         |           |           |           | 1         | 0.391         |
|  |                            |           | cgd1_3810                                                                                                              | conserved hypothetical protein                                                                                                                              |           |           |           | 1         | 1         | 501.576       |
|  |                            |           | cgd1_720                                                                                                               | apicomplexan-conserved protein                                                                                                                              |           |           | 1         |           | 1         | 2.411         |
|  |                            |           | cgd1_770                                                                                                               | hypothetical protein, possible apicomplexan-conserved                                                                                                       | 1         |           |           |           | 1         | 0.318         |
|  |                            |           | cgd1_840                                                                                                               | conserved hypothetical protein                                                                                                                              |           |           | 1         |           | 1         | 28.197        |
|  |                            |           | cgd2_1010                                                                                                              | conserved hypothetical protein                                                                                                                              |           |           | 1         |           | 1         | 2.547         |
|  |                            |           | cgd2_1210                                                                                                              | conserved hypothetical protein                                                                                                                              |           |           | 1         |           | 1         | 3.756         |
|  |                            |           | cgd2_1220                                                                                                              | conserved hypothetical protein                                                                                                                              |           |           | 1         |           | 1         | 13.063        |
|  |                            |           | cgd2_140                                                                                                               | conserved hypothetical protein                                                                                                                              |           |           |           | 1         | 1         | 836.204       |
|  |                            |           | cgd2_190                                                                                                               | conserved hypothetical protein                                                                                                                              |           |           | 1         |           | 1         | 4.060         |
|  |                            |           | cgd2_200                                                                                                               | possible apicomplexan-specific protein                                                                                                                      |           |           |           | 1         | 1         | 1,742.091     |

|           |                                                                      |   |   |   |   |   |         |
|-----------|----------------------------------------------------------------------|---|---|---|---|---|---------|
| cgd2_2000 | apicomplexan protein with signal peptide and 3 transmembrane domains |   | 1 |   |   | 1 | 1.584   |
| cgd2_2230 | conserved hypothetical protein                                       |   |   |   | 1 | 1 | 25.464  |
| cgd2_2320 | conserved hypothetical protein                                       | 1 |   |   |   | 1 | 0.369   |
| cgd2_250  | conserved hypothetical protein                                       |   |   |   | 1 | 1 | 52.866  |
| cgd2_2510 | conserved hypothetical protein                                       | 1 |   |   |   | 1 | 0.509   |
| cgd2_2610 | conserved hypothetical protein                                       | 1 |   |   |   | 1 | 0.460   |
| cgd2_2790 | conserved hypothetical protein                                       |   | 1 |   |   | 1 | 1.653   |
| cgd2_2810 | conserved hypothetical protein                                       | 1 |   |   |   | 1 | 0.444   |
| cgd2_2920 | conserved hypothetical protein                                       | 1 |   |   |   | 1 | 0.463   |
| cgd2_2940 | conserved hypothetical protein                                       |   |   |   | 1 | 1 | 85.144  |
| cgd2_320  | conserved hypothetical protein                                       |   |   | 1 |   | 1 | 5.125   |
| cgd2_3380 | conserved hypothetical protein                                       |   | 1 |   |   | 1 | 1.488   |
| cgd2_3520 | conserved hypothetical protein                                       |   |   |   | 1 | 1 | 14.974  |
| cgd2_3600 | conserved hypothetical protein                                       | 1 |   |   |   | 1 | 0.397   |
| cgd2_3650 | conserved hypothetical protein                                       |   |   |   | 1 | 1 | 12.884  |
| cgd2_3730 | conserved hypothetical protein                                       |   |   |   | 1 | 1 | 648.512 |
| cgd2_3760 | conserved hypothetical protein                                       |   |   | 1 |   | 1 | 2.971   |
| cgd2_40   | conserved hypothetical protein                                       | 1 |   |   |   | 1 | 0.519   |
| cgd2_4170 | conserved hypothetical protein                                       |   | 1 |   |   | 1 | 1.901   |
| cgd3_10   | conserved hypothetical protein                                       |   |   |   | 1 | 1 | 6.573   |
| cgd3_1140 | conserved hypothetical protein                                       |   | 1 |   |   | 1 | 1.859   |
| cgd3_1150 | conserved hypothetical protein                                       |   | 1 |   |   | 1 | 2.080   |
| cgd3_1160 | conserved hypothetical protein                                       |   |   |   | 1 | 1 | 15.224  |
| cgd3_1170 | conserved hypothetical protein                                       |   | 1 |   |   | 1 | 2.263   |
| cgd3_1420 | conserved small protein                                              |   |   |   | 1 | 1 | 30.229  |
| cgd3_1560 | apicomplexan specific region near N-terminus                         |   |   | 1 |   | 1 | 5.696   |
| cgd3_1620 | conserved hypothetical protein                                       |   | 1 |   |   | 1 | 2.147   |
| cgd3_1700 | conserved hypothetical protein                                       | 1 |   |   |   | 1 | 0.472   |
| cgd3_1710 | conserved hypothetical protein                                       |   | 1 |   |   | 1 | 2.241   |
| cgd3_1720 | conserved hypothetical protein                                       | 1 |   |   |   | 1 | 0.396   |
| cgd3_1730 | conserved hypothetical protein                                       |   | 1 |   |   | 1 | 1.294   |
| cgd3_1750 | conserved hypothetical protein                                       |   |   |   | 1 | 1 | 16.963  |
| cgd3_1760 | conserved hypothetical protein                                       |   |   |   | 1 | 1 | 10.677  |
| cgd3_1770 | conserved hypothetical protein                                       |   |   | 1 |   | 1 | 2.984   |
| cgd3_1780 | conserved hypothetical protein                                       | 1 |   |   |   | 1 | 0.454   |
| cgd3_1790 | conserved hypothetical protein                                       | 1 |   |   |   | 1 | 0.518   |
| cgd3_1940 | conserved hypothetical protein                                       |   |   |   | 1 | 1 | 354.170 |
| cgd3_2240 | conserved hypothetical protein                                       | 1 |   |   |   | 1 | 0.464   |
| cgd3_230  | conserved hypothetical protein                                       | 1 |   |   |   | 1 | 0.307   |
| cgd3_2520 | conserved hypothetical protein                                       | 1 |   |   |   | 1 | 0.444   |
| cgd3_2570 | conserved protein                                                    | 1 |   |   |   | 1 | 0.426   |
| cgd3_2820 | conserved hypothetical protein                                       | 1 |   |   |   | 1 | 0.538   |
| cgd3_2970 | conserved hypothetical protein                                       | 1 |   |   |   | 1 | 0.308   |
| cgd3_2980 | conserved COOH terminal-specific cysteine rich domain                | 1 |   |   |   | 1 | 0.462   |
| cgd3_3090 | conserved hypothetical protein                                       | 1 |   |   |   | 1 | 0.431   |
| cgd3_3360 | conserved hypothetical protein                                       |   |   |   | 1 | 1 | 5.916   |
| cgd3_3390 | conserved hypothetical protein                                       | 1 |   |   |   | 1 | 0.408   |
| cgd3_3660 | conserved hypothetical protein                                       |   |   |   | 1 | 1 | 8.462   |
| cgd3_3810 | conserved hypothetical protein                                       | 1 |   |   |   | 1 | 0.309   |
| cgd3_3870 | conserved hypothetical protein                                       |   |   |   | 1 | 1 | 94.766  |
| cgd3_4010 | conserved protein                                                    |   |   |   | 1 | 1 | 7.066   |
| cgd3_4160 | conserved hypothetical protein                                       |   |   |   | 1 | 1 | 198.349 |
| cgd3_4320 | conserved hypothetical protein                                       | 1 |   |   |   | 1 | 0.550   |
| cgd3_4360 | conserved hypothetical protein                                       | 1 |   |   |   | 1 | 0.450   |
| cgd3_50   | conserved hypothetical protein                                       |   | 1 |   |   | 1 | 1.289   |
| cgd3_670  | conserved hypothetical protein                                       |   |   |   | 1 | 1 | 35.845  |
| cgd3_730  | conserved expressed protein                                          |   |   |   | 1 | 1 | 3.959   |
| cgd3_950  | hypothetical conserved protein                                       | 1 |   |   |   | 1 | 0.408   |
| cgd4_1080 | conserved hypothetical protein                                       |   |   |   | 1 | 1 | 3.738   |
| cgd4_1090 | conserved hypothetical protein                                       |   |   |   | 1 | 1 | 6.043   |
| cgd4_1150 | hypothetical conserved protein with possible signal peptide          | 1 |   |   |   | 1 | 0.360   |
| cgd4_1190 | hypothetical protein, possible apicomplexan conserved                | 1 |   |   |   | 1 | 0.398   |
| cgd4_1220 | conserved hypothetical protein                                       |   |   |   | 1 | 1 | 49.713  |
| cgd4_1400 | conserved hypothetical protein                                       |   |   |   | 1 | 1 | 40.717  |
| cgd4_1440 | apicomplexan specific protein                                        |   | 1 |   |   | 1 | 1.278   |
| cgd4_1510 | conserved hypothetical protein                                       |   |   | 1 |   | 1 | 2.308   |
| cgd4_1530 | conserved protein                                                    |   |   |   | 1 | 1 | 21.579  |
| cgd4_1550 | conserved hypothetical protein                                       |   |   |   | 1 | 1 | 3.800   |
| cgd4_1570 | hypothetical protein, possible conserved                             |   |   |   | 1 | 1 | 8.908   |
| cgd4_1680 | conserved hypothetical protein                                       | 1 |   |   |   | 1 | 0.396   |
| cgd4_1910 | conserved hypothetical protein                                       |   | 1 |   |   | 1 | 1.853   |
| cgd4_2010 | conserved hypothetical protein                                       |   |   | 1 |   | 1 | 5.265   |
| cgd4_2020 | conserved hypothetical protein                                       |   |   |   | 1 | 1 | 5.904   |
| cgd4_2060 | conserved hypothetical protein                                       | 1 |   |   |   | 1 | 0.385   |
| cgd4_2210 | conserved hypothetical protein                                       | 1 |   |   |   | 1 | 0.429   |

|           |                                                                                                       |   |   |   |   |   |         |
|-----------|-------------------------------------------------------------------------------------------------------|---|---|---|---|---|---------|
| cgd4_2390 | conserved hypothetical protein                                                                        | 1 |   |   |   | 1 | 0.622   |
| cgd4_2850 | hypothetical protein, possible apicomplexan conserved                                                 |   |   | 1 |   | 1 | 4.047   |
| cgd4_3100 | conserved hypothetical protein                                                                        | 1 |   |   |   | 1 | 0.441   |
| cgd4_3570 | conserved hypothetical protein                                                                        |   |   | 1 |   | 1 | 3.333   |
| cgd4_3580 | conserved hypothetical protein                                                                        |   | 1 |   |   | 1 | 2.245   |
| cgd4_3590 | conserved hypothetical protein                                                                        |   |   |   | 1 | 1 | 10.942  |
| cgd4_3630 | conserved hypothetical protein                                                                        |   |   |   | 1 | 1 | 32.062  |
| cgd4_3650 | conserved hypothetical protein                                                                        |   |   |   | 1 | 1 | 38.743  |
| cgd4_3770 | conserved hypothetical protein                                                                        |   |   |   | 1 | 1 | 8.784   |
| cgd4_4110 | hypothetical conserved protein, possible transmembrane domain near C-terminus                         |   |   |   | 1 | 1 | 44.812  |
| cgd4_4140 | conserved hypothetical protein                                                                        |   |   |   | 1 | 1 | 21.495  |
| cgd4_4280 | conserved hypothetical protein                                                                        | 1 |   |   |   | 1 | 0.324   |
| cgd4_4490 | conserved hypothetical protein                                                                        | 1 |   |   |   | 1 | 0.377   |
| cgd4_70   | conserved hypothetical protein                                                                        |   |   |   | 1 | 1 | 11.116  |
| cgd4_700  | conserved protein of possible plant or bacterial origin                                               |   | 1 |   |   | 1 | 1.442   |
| cgd4_790  | small conserved protein                                                                               | 1 |   |   |   | 1 | 0.360   |
| cgd5_1020 | apicomplexan conserved protein with 9 transmembrane domain                                            | 1 |   |   |   | 1 | 0.427   |
| cgd5_1030 | apicomplexan conserved protein                                                                        |   |   | 1 |   | 1 | 5.334   |
| cgd5_1270 | conserved protein having 3 transmembrane domains and possible ER retention motif; possible ER protein | 1 |   |   |   | 1 | 0.469   |
| cgd5_1310 | conserved protein with possible signal peptide and ER retention motif; possible ER protein            |   |   | 1 |   | 1 | 2.461   |
| cgd5_1340 | conserved hypothetical protein                                                                        |   |   |   | 1 | 1 | 11.264  |
| cgd5_1410 | conserved protein                                                                                     | 1 |   |   |   | 1 | 0.339   |
| cgd5_1540 | conserved hypothetical protein                                                                        |   | 1 |   |   | 1 | 1.551   |
| cgd5_1790 | conserved eukaryotic protein                                                                          |   | 1 |   |   | 1 | 1.817   |
| cgd5_1860 | conserved hypothetical protein                                                                        |   |   |   | 1 | 1 | 22.521  |
| cgd5_1880 | conserved probable chaperonin containing TCP-1 delta subunit                                          |   | 1 |   |   | 1 | 1.432   |
| cgd5_2380 | uncharacterized apicomplexan-specific serine rich low complexity protein                              |   | 1 |   |   | 1 | 1.593   |
| cgd5_2520 | conserved hypothetical protein                                                                        | 1 |   |   |   | 1 | 0.343   |
| cgd5_270  | Unc45-like TPR repeat containing protein                                                              | 1 |   |   |   | 1 | 0.395   |
| cgd5_2740 | conserved hypothetical protein                                                                        |   | 1 |   |   | 1 | 2.064   |
| cgd5_3660 | hypothetical conserved protein                                                                        |   |   | 1 |   | 1 | 3.297   |
| cgd5_3890 | possible apicomplexan specific, low complexity protein                                                | 1 |   |   |   | 1 | 0.430   |
| cgd5_3940 | hypothetical protein, possible apicomplexan-specific                                                  |   |   |   | 1 | 1 | 8.912   |
| cgd5_4060 | conserved hypothetical protein                                                                        | 1 |   |   |   | 1 | 0.534   |
| cgd5_4370 | conserved hypothetical protein                                                                        | 1 |   |   |   | 1 | 0.497   |
| cgd5_4530 | conserved hypothetical protein                                                                        |   |   |   | 1 | 1 | 5.858   |
| cgd5_4580 | conserved hypothetical protein                                                                        |   | 1 |   |   | 1 | 1.493   |
| cgd5_4600 | conserved hypothetical protein                                                                        |   |   | 1 |   | 1 | 2.389   |
| cgd5_490  | conserved hypothetical protein                                                                        | 1 |   |   |   | 1 | 0.343   |
| cgd5_500  | conserved protein                                                                                     |   | 1 |   |   | 1 | 1.732   |
| cgd5_620  | conserved hypothetical protein                                                                        |   |   | 1 |   | 1 | 3.964   |
| cgd5_650  | conserved hypothetical protein                                                                        |   | 1 |   |   | 1 | 1.747   |
| cgd5_790  | conserved protein having a signal peptide                                                             | 1 |   |   |   | 1 | 0.378   |
| cgd6_1070 | conserved hypothetical protein                                                                        | 1 |   |   |   | 1 | 0.359   |
| cgd6_1080 | conserved hypothetical protein                                                                        |   |   |   | 1 | 1 | 23.828  |
| cgd6_1300 | conserved hypothetical protein                                                                        | 1 |   |   |   | 1 | 0.464   |
| cgd6_1310 | hypothetical protein, possible conservation in apicomplexa                                            | 1 |   |   |   | 1 | 0.438   |
| cgd6_1480 | conserved hypothetical protein                                                                        |   | 1 |   |   | 1 | 1.974   |
| cgd6_1550 | uncharacterized conserved protein                                                                     | 1 |   |   |   | 1 | 0.416   |
| cgd6_1640 | conserved hypothetical protein                                                                        | 1 |   |   |   | 1 | 0.349   |
| cgd6_1650 | conserved hypothetical protein                                                                        | 1 |   |   |   | 1 | 0.370   |
| cgd6_1660 | conserved hypothetical protein                                                                        |   | 1 |   |   | 1 | 1.965   |
| cgd6_1820 | conserved hypothetical protein                                                                        |   |   |   | 1 | 1 | 47.127  |
| cgd6_1910 | conserved hypothetical protein                                                                        |   |   | 1 |   | 1 | 3.510   |
| cgd6_230  | conserved hypothetical protein                                                                        | 1 |   |   |   | 1 | 0.370   |
| cgd6_2420 | conserved hypothetical protein                                                                        |   |   |   | 1 | 1 | 11.272  |
| cgd6_2550 | conserved hypothetical protein                                                                        | 1 |   |   |   | 1 | 0.677   |
| cgd6_30   | conserved hypothetical protein                                                                        |   |   |   | 1 | 1 | 9.953   |
| cgd6_3260 | conserved hypothetical protein                                                                        | 1 |   |   |   | 1 | 0.350   |
| cgd6_40   | conserved hypothetical protein                                                                        |   |   |   | 1 | 1 | 878.258 |
| cgd6_4080 | conserved hypothetical protein                                                                        |   | 1 |   |   | 1 | 1.840   |
| cgd6_4130 | conserved hypothetical protein                                                                        |   |   |   | 1 | 1 | 8.262   |
| cgd6_4660 | possible apicomplexan-specific protein                                                                |   |   |   | 1 | 1 | 106.625 |
| cgd6_5320 | conserved hypothetical protein                                                                        | 1 |   |   |   | 1 | 0.457   |
| cgd6_5330 | conserved hypothetical protein                                                                        | 1 |   |   |   | 1 | 0.350   |
| cgd6_5340 | conserved hypothetical protein                                                                        | 1 |   |   |   | 1 | 0.422   |
| cgd6_5380 | conserved hypothetical protein                                                                        |   |   |   | 1 | 1 | 10.469  |
| cgd6_5460 | conserved hypothetical protein                                                                        | 1 |   |   |   | 1 | 0.633   |
| cgd6_5480 | conserved hypothetical protein                                                                        | 1 |   |   |   | 1 | 0.448   |
| cgd6_5490 | conserved hypothetical protein                                                                        | 1 |   |   |   | 1 | 0.410   |
| cgd6_680  | conserved protein with possible C2 domain                                                             | 1 |   |   | 1 | 2 | 3.188   |
| cgd6_70   | conserved hypothetical protein                                                                        |   |   | 1 |   | 1 | 3.364   |
| cgd6_830  | conserved hypothetical protein                                                                        |   | 1 |   |   | 1 | 1.810   |



|           |                                                                                       |   |   |   |   |   |           |
|-----------|---------------------------------------------------------------------------------------|---|---|---|---|---|-----------|
| cgd6_870  | possible apicomplexan conserved protein                                               | 1 |   |   |   | 1 | 0.438     |
| cgd7_1060 | apicomplexan conserved protein with 2 or more transmembrane domains                   |   |   | 1 |   | 1 | 2.333     |
| cgd7_1150 | uncharacterized conserved protein                                                     | 1 |   |   |   | 1 | 0.262     |
| cgd7_1160 | conserved hypothetical protein                                                        |   | 1 |   |   | 1 | 1.409     |
| cgd7_1180 | conserved hypothetical protein                                                        |   |   | 1 |   | 1 | 3.055     |
| cgd7_1340 | conserved hypothetical protein                                                        |   | 1 |   |   | 1 | 1.616     |
| cgd7_1380 | conserved hypothetical protein                                                        |   |   | 1 |   | 1 | 2.382     |
| cgd7_1390 | conserved hypothetical protein                                                        |   |   | 1 |   | 1 | 2.436     |
| cgd7_1500 | conserved protein                                                                     | 1 |   |   |   | 1 | 0.405     |
| cgd7_250  | conserved protein                                                                     |   |   |   | 1 | 1 | 20.096    |
| cgd7_2510 | conserved hypothetical protein                                                        |   |   |   | 1 | 1 | 9.015     |
| cgd7_2520 | conserved hypothetical protein                                                        |   |   |   | 1 | 1 | 21.146    |
| cgd7_2690 | conserved hypothetical protein                                                        |   |   | 1 |   | 1 | 2.914     |
| cgd7_270  | conserved hypothetical protein                                                        | 1 |   | 1 |   | 2 | 2.618     |
| cgd7_310  | conserved hypothetical protein                                                        |   | 1 |   |   | 1 | 2.181     |
| cgd7_3100 | conserved hypothetical protein                                                        |   |   |   | 1 | 1 | 16.123    |
| cgd7_3160 | conserved hypothetical protein                                                        |   |   | 1 |   | 1 | 3.784     |
| cgd7_3220 | conserved hypothetical protein                                                        |   |   | 1 |   | 1 | 2.454     |
| cgd7_3300 | conserved hypothetical protein                                                        | 1 |   |   |   | 1 | 0.503     |
| cgd7_340  | conserved hypothetical protein                                                        | 1 |   |   |   | 1 | 0.588     |
| cgd7_3490 | conserved hypothetical protein                                                        |   |   |   |   | 1 | 65.965    |
| cgd7_350  | conserved hypothetical protein                                                        | 1 |   |   |   | 1 | 0.430     |
| cgd7_3540 | conserved hypothetical protein                                                        |   | 1 |   |   | 1 | 2.220     |
| cgd7_3550 | conserved hypothetical protein                                                        |   |   |   | 1 | 1 | 17.376    |
| cgd7_3740 | apicomplexan P36 family of proteins, appears to be a divergent HAD family phosphatase | 1 |   |   |   | 1 | 0.390     |
| cgd7_3810 | conserved hypothetical protein                                                        |   |   |   | 1 | 1 | 6.003     |
| cgd7_3830 | conserved hypothetical protein                                                        |   |   | 1 |   | 1 | 3.059     |
| cgd7_3840 | conserved hypothetical protein                                                        |   |   | 1 |   | 1 | 4.068     |
| cgd7_3860 | conserved hypothetical protein                                                        | 1 |   |   |   | 1 | 0.332     |
| cgd7_3870 | conserved hypothetical protein                                                        | 1 |   |   |   | 1 | 0.311     |
| cgd7_4410 | conserved protein with YSHH motif. Some fused to polo box.                            |   |   |   | 1 | 1 | 8.532     |
| cgd7_4710 | conserved hypothetical protein                                                        |   |   |   |   | 1 | 101.754   |
| cgd7_4780 | conserved hypothetical protein                                                        | 1 |   |   |   | 1 | 0.357     |
| cgd7_5080 | conserved hypothetical protein                                                        | 1 |   |   |   | 1 | 0.454     |
| cgd7_5120 | conserved hypothetical protein                                                        | 1 |   |   |   | 1 | 0.551     |
| cgd7_5400 | conserved hypothetical protein                                                        | 1 |   |   |   | 1 | 0.347     |
| cgd7_5450 | conserved hypothetical protein                                                        | 1 |   |   |   | 1 | 0.496     |
| cgd7_610  | apicomplexan conserved protein                                                        |   | 1 |   |   | 1 | 1.594     |
| cgd7_650  | conserved hypothetical protein                                                        |   |   | 1 |   | 1 | 3.889     |
| cgd8_1060 | uncharacterized conserved protein                                                     |   |   |   | 1 | 1 | 18.004    |
| cgd8_130  | conserved hypothetical protein                                                        | 1 |   |   |   | 1 | 0.510     |
| cgd8_1340 | conserved hypothetical protein                                                        | 1 | 1 |   |   | 2 | 0.976     |
| cgd8_2080 | conserved hypothetical protein                                                        |   | 1 |   |   | 1 | 1.584     |
| cgd8_2110 | conserved hypothetical protein                                                        | 1 |   |   |   | 1 | 0.441     |
| cgd8_230  | conserved hypothetical protein                                                        |   |   | 1 |   | 1 | 2.337     |
| cgd8_2320 | hypothetical protein, potential AT hook                                               | 1 |   |   |   | 1 | 0.444     |
| cgd8_2490 | conserved hypothetical protein                                                        |   |   |   |   | 1 | 160.860   |
| cgd8_2540 | apicomplexan specific coiled coil protein                                             | 1 |   |   |   | 1 | 0.445     |
| cgd8_2550 | apicomplexan specific membrane protein, 4+ transmembrane domain                       | 1 |   |   |   | 1 | 0.387     |
| cgd8_2640 | conserved metal binding motif protein                                                 | 1 |   |   |   | 1 | 0.337     |
| cgd8_2650 | conserved hypothetical protein                                                        | 1 |   |   |   | 1 | 0.406     |
| cgd8_270  | conserved hypothetical protein                                                        | 1 |   |   |   | 1 | 0.393     |
| cgd8_2780 | conserved protein                                                                     | 1 |   |   |   | 1 | 0.561     |
| cgd8_280  | apicomplexan conserved protein                                                        |   |   | 1 |   | 1 | 3.966     |
| cgd8_2880 | possible apicomplexan conserved motif                                                 |   | 1 |   |   | 1 | 2.134     |
| cgd8_2890 | conserved hypothetical protein                                                        |   | 1 |   |   | 1 | 1.435     |
| cgd8_3150 | hypothetical conserved protein                                                        |   |   |   | 1 | 1 | 18.461    |
| cgd8_3230 | conserved hypothetical protein                                                        |   |   |   |   | 1 | 507.630   |
| cgd8_3240 | apicomplexan specific protein                                                         |   |   |   | 1 | 1 | 12.144    |
| cgd8_3330 | conserved hypothetical protein                                                        |   |   |   | 1 | 1 | 8.735     |
| cgd8_3630 | conserved hypothetical protein                                                        |   |   |   | 1 | 1 | 18.339    |
| cgd8_3730 | conserved hypothetical protein                                                        |   | 1 |   |   | 1 | 1.245     |
| cgd8_4030 | apicomplexan specific coiled coil protein                                             | 1 |   |   |   | 1 | 0.465     |
| cgd8_4170 | conserved hypothetical protein                                                        |   |   | 1 |   | 1 | 3.792     |
| cgd8_4220 | conserved hypothetical protein                                                        |   |   |   |   | 1 | 320.236   |
| cgd8_4260 | conserved hypothetical protein                                                        |   |   |   |   | 1 | 35.637    |
| cgd8_4320 | possible conserved domain (Zn finger?)                                                |   |   |   |   | 1 | 1,685.645 |
| cgd8_4370 | conserved protein                                                                     |   |   |   |   | 1 | 73.348    |
| cgd8_4670 | apicomplexan specific Pf 23612804 and Py 23478322                                     |   |   | 1 |   | 1 | 4.020     |
| cgd8_4680 | conserved protein; Py hit 23481194                                                    |   |   |   |   | 1 | 63.692    |
| cgd8_4850 | conserved hypothetical protein                                                        | 1 | 1 |   |   | 2 | 1.001     |
| cgd8_5000 | hypothetical protein, possible conserved                                              |   |   |   |   | 1 | 99.274    |
| cgd8_5130 | conserved hypothetical protein                                                        |   | 1 |   |   | 1 | 1.656     |
| cgd8_5160 | uncharacterized apicomplexan-specific protein                                         |   |   |   | 1 | 1 | 13.739    |

|                 |           |                                                                                                                                     |    |    |    |    |    |     |         |
|-----------------|-----------|-------------------------------------------------------------------------------------------------------------------------------------|----|----|----|----|----|-----|---------|
|                 | cgd8_5350 | conserved hypothetical protein                                                                                                      |    |    |    |    | 1  | 1   | 7.709   |
|                 | cgd8_5360 | conserved hypothetical protein                                                                                                      |    |    |    |    | 1  | 1   | 119.462 |
|                 | cgd8_5380 | conserved hypothetical protein                                                                                                      |    |    |    |    | 1  | 1   | 16.047  |
|                 | cgd8_5390 | conserved hypothetical protein                                                                                                      |    |    |    |    | 1  | 1   | 10.551  |
|                 | cgd8_5400 | conserved hypothetical protein                                                                                                      |    |    | 1  |    |    | 1   | 1.761   |
|                 | cgd8_5420 | conserved hypothetical protein                                                                                                      |    |    |    |    | 1  | 1   | 153.778 |
|                 | cgd8_690  | conserved hypothetical protein                                                                                                      | 1  |    |    |    |    | 1   | 0.311   |
|                 | cgd8_70   | conserved hypothetical protein                                                                                                      |    |    |    |    | 1  | 1   | 8.491   |
|                 | cgd8_940  | conserved hypothetical protein                                                                                                      |    |    |    |    | 1  | 1   | 205.198 |
| Conserved Total |           |                                                                                                                                     | 97 | 41 | 40 | 49 | 34 | 261 | 39.608  |
| Membrane        | cgd1_10   | predicted membrane associated protein with 11 transmembrane domains regions                                                         |    | 1  |    |    |    | 1   | 1.697   |
|                 | cgd1_1470 | hypothetical protein, possible transmembrane domain within N-terminus                                                               |    |    |    |    | 1  | 1   | 6.311   |
|                 | cgd1_1480 | predicted membrane associated protein, 4 transmembrane domains and signal peptide                                                   |    |    | 1  |    |    | 1   | 5.762   |
|                 | cgd1_1820 | predicted integral membrane protein, 4 transmembrane domains                                                                        |    |    |    |    | 1  | 1   | 15.664  |
|                 | cgd1_20   | predicted membrane associated protein with 11 transmembrane domains regions                                                         |    |    |    |    | 1  | 1   | 3.252   |
|                 | cgd1_2030 | membrane associated protein with over 9 transmembrane domains, signal peptide                                                       |    |    |    |    | 1  | 1   | 2.737   |
|                 | cgd1_2080 | hypothetical protein containing signal peptide and 3 transmembrane domain regions                                                   |    | 1  |    |    |    | 1   | 1.910   |
|                 | cgd1_2090 | hypothetical protein, C2C2 like finger                                                                                              |    | 1  |    |    |    | 1   | 2.170   |
|                 | cgd1_2510 | hypothetical protein, transmembrane domain within N-terminus                                                                        | 1  |    |    |    |    | 1   | 0.438   |
|                 | cgd1_2780 | hypothetical protein, 4 transmembrane domains                                                                                       |    |    |    |    | 1  | 1   | 16.287  |
|                 | cgd1_2880 | 13 kda membrane protein subunit                                                                                                     |    | 1  |    |    |    | 1   | 2.242   |
|                 | cgd1_30   | predicted membrane protein with 12+transmembrane domain                                                                             | 1  |    |    |    |    | 1   | 0.579   |
|                 | cgd1_3200 | hypothetical protein with 2 transmembrane domains, possible apicomplexan conservation                                               | 1  |    |    |    |    | 1   | 0.380   |
|                 | cgd1_3250 | signal peptide, possible transmembrane domain near N-terminus, proline rich and His-stretch at C-terminus                           |    |    |    |    | 1  | 1   | 12.450  |
|                 | cgd1_3590 | hypothetical protein, possible transmembrane domain                                                                                 | 1  |    |    |    |    | 1   | 0.501   |
|                 | cgd1_3680 | extracellular membrane associated protein with 3 EGF domains and a transmembrane domain                                             | 1  |    |    |    |    | 1   | 0.361   |
|                 | cgd1_3820 | hypothetical protein, transmembrane domain or GPI anchor near C-terminus                                                            |    |    |    |    | 1  | 1   | 45.793  |
|                 | cgd1_3850 | signal peptide, possible 4-5x transmembrane domain, SKSR family paralog, telomeric gene                                             |    |    |    |    | 1  | 1   | 172.377 |
|                 | cgd1_780  | hypothetical protein, possible 2 transmembrane domains                                                                              |    | 1  |    |    |    | 1   | 1.471   |
|                 | cgd1_950  | hypothetical protein, membrane associated ankyrin repeats, 3X signal peptide plus transmembrane domain or GPI anchor                |    | 1  |    |    |    | 1   | 1.907   |
|                 | cgd2_1290 | hypothetical protein, signal peptide, transmembrane domain near C-terminus                                                          | 1  | 1  |    |    |    | 2   | 0.909   |
|                 | cgd2_1310 | 11 transmembrane domain protein                                                                                                     |    |    |    |    | 1  | 1   | 21.320  |
|                 | cgd2_1590 | extracellular protein with signal peptide, 5xEGF and apple domains                                                                  |    | 1  |    |    |    | 1   | 1.739   |
|                 | cgd2_1710 | hypothetical protein with signal peptide and one or more transmembrane domain regions                                               | 1  |    |    |    |    | 1   | 0.383   |
|                 | cgd2_1990 | hypothetical protein with possible transmembrane domain or GPI at C-terminus                                                        | 1  |    |    |    |    | 1   | 0.315   |
|                 | cgd2_2250 | putative integral membrane protein                                                                                                  |    |    | 1  |    |    | 1   | 3.186   |
|                 | cgd2_2390 | hypothetical protein with 8 transmembrane domains                                                                                   |    |    |    |    | 1  | 1   | 6.463   |
|                 | cgd2_2490 | hypothetical protein, possible transmembrane domain at C-terminus                                                                   | 1  |    |    |    |    | 1   | 0.388   |
|                 | cgd2_2630 | hypothetical protein, signal peptide plus 11 transmembrane domains                                                                  |    | 1  |    |    |    | 1   | 1.682   |
|                 | cgd2_2650 | hypothetical protein, signal peptide, transmembrane domain near C-terminus                                                          |    |    |    |    | 1  | 1   | 5.900   |
|                 | cgd2_2840 | pleckstrin homology (PH) domain containing protein with N-terminal ankyrin repeats                                                  |    | 1  |    |    |    | 1   | 1.359   |
|                 | cgd2_3080 | CpTSP10 protein                                                                                                                     |    | 1  |    |    |    | 1   | 2.004   |
|                 | cgd2_3100 | hypothetical protein, 8 transmembrane domains                                                                                       |    |    |    |    | 1  | 1   | 2.458   |
|                 | cgd2_3120 | possible transmembrane domain near N                                                                                                |    |    |    |    | 1  | 1   | 24.537  |
|                 | cgd2_3470 | hypothetical protein with signal peptide and one or more transmembrane domains                                                      | 1  |    |    |    |    | 1   | 0.230   |
|                 | cgd2_3560 | hypothetical protein with 8 transmembrane domains                                                                                   | 1  |    |    |    |    | 1   | 0.290   |
|                 | cgd2_3750 | hypothetical protein, transmembrane domain near C-terminus                                                                          |    | 1  |    |    |    | 1   | 1.471   |
|                 | cgd2_4060 | hypothetical protein with 12 transmembrane domains                                                                                  | 1  |    |    |    |    | 1   | 0.360   |
|                 | cgd2_4350 | putative patched family protein with 12 transmembrane domain                                                                        |    | 1  |    |    |    | 1   | 1.572   |
|                 | cgd2_650  | hypothetical protein with transmembrane domain within N-terminus                                                                    | 1  |    |    |    |    | 1   | 0.352   |
|                 | cgd2_790  | CpCCp3, multidomain extracellular protein with a signal peptide and the following architecture: LH2+LCCL+2xSR+LCCL+pentraxin+2xLCCL |    |    |    |    | 1  | 1   | 4.267   |
|                 | cgd2_800  | hypothetical protein with 10 transmembrane domains                                                                                  | 1  |    |    |    |    | 1   | 0.418   |
|                 | cgd2_940  | signal peptide plus transmembrane domain or GPI anchor                                                                              |    |    |    |    | 1  | 1   | 240.895 |
|                 | cgd3_1010 | hypothetical protein with 3 transmembrane domains within C-terminus                                                                 | 1  |    |    |    |    | 1   | 0.538   |
|                 | cgd3_1370 | hypothetical protein, transmembrane domain or GPI anchor at C-terminus                                                              | 1  |    |    |    |    | 1   | 0.312   |

|           |                                                                                                                                                                     |   |   |   |   |   |         |
|-----------|---------------------------------------------------------------------------------------------------------------------------------------------------------------------|---|---|---|---|---|---------|
| cgd3_1520 | hypothetical protein with transmembrane or GPI anchor sequence at carboxy terminus                                                                                  |   |   | 1 |   | 1 | 2.618   |
| cgd3_1600 | hypothetical protein with 4 transmembrane domains                                                                                                                   | 1 |   |   |   | 1 | 0.413   |
| cgd3_1640 | hypothetical protein with 7 transmembrane domains                                                                                                                   |   |   | 1 |   | 1 | 4.519   |
| cgd3_1740 | hypothetical protein with signal peptide and 2 transmembrane domains                                                                                                |   |   |   | 1 | 1 | 9.113   |
| cgd3_1800 | hypothetical protein with 12 transmembrane domains                                                                                                                  |   |   | 1 |   | 1 | 1.303   |
| cgd3_1860 | extracellular protein with a signal peptide and 9 EGF domains                                                                                                       | 1 |   |   |   | 1 | 0.421   |
| cgd3_1930 | hypothetical protein with 4 transmembrane domains                                                                                                                   | 1 |   |   |   | 1 | 0.391   |
| cgd3_2080 | large protein with 8 or more transmembrane domains within NH2 region                                                                                                |   |   | 1 |   | 1 | 4.105   |
| cgd3_2300 | hypothetical protein with transmembrane domain within C-terminus                                                                                                    |   |   |   | 1 | 1 | 18.959  |
| cgd3_2500 | hypothetical protein with transmembrane region near N-terminus                                                                                                      | 1 |   |   |   | 1 | 0.444   |
| cgd3_2780 | hypothetical protein with transmembrane domain at carboxy terminus                                                                                                  | 1 |   |   |   | 1 | 0.468   |
| cgd3_2990 | hypothetical protein with signal peptide and 7 transmembrane domains                                                                                                |   | 1 |   |   | 1 | 2.094   |
| cgd3_340  | hypothetical protein with signal peptide and 5 transmembrane domains                                                                                                |   |   |   | 1 | 1 | 15.006  |
| cgd3_3420 | protein with 2x EF hands and 4 transmembrane regions                                                                                                                | 1 |   |   |   | 1 | 0.386   |
| cgd3_3430 | extracellular protein with a signal peptide sequence, MAM domain and a Cu amine oxidase domain                                                                      |   | 1 |   |   | 1 | 1.291   |
| cgd3_3940 | predicted membrane associated protein                                                                                                                               |   |   |   |   | 1 | 189.171 |
| cgd3_4030 | hypothetical protein with 7 transmembrane domain domain                                                                                                             |   |   |   | 1 | 1 | 83.491  |
| cgd3_4300 | possible t-snares domain, possible transmembrane domain or GPI anchor signal at C-terminus                                                                          |   |   | 1 |   | 1 | 8.767   |
| cgd3_470  | hypothetical protein with 10 transmembrane domains                                                                                                                  |   |   |   |   | 1 | 72.023  |
| cgd3_540  | protein with 12 transmembrane domains                                                                                                                               |   |   |   | 1 | 1 | 95.706  |
| cgd3_550  | protein with 12 transmembrane domains                                                                                                                               |   |   |   | 1 | 1 | 172.497 |
| cgd3_590  | hypothetical protein with 4 transmembrane domains, possible unusual phyletic distribution                                                                           |   | 1 |   |   | 1 | 1.585   |
| cgd3_610  | hypothetical protein with possible 4 transmembrane domains                                                                                                          |   |   |   |   | 1 | 166.828 |
| cgd3_740  | hypothetical protein with 7 transmembrane domains                                                                                                                   |   |   | 1 |   | 1 | 4.818   |
| cgd3_970  | hypothetical protein, possible 2 transmembrane domains                                                                                                              | 1 |   |   |   | 1 | 0.367   |
| cgd4_1120 | WD40 repeat containing protein that has a transmembrane region at the C-terminus                                                                                    | 1 |   |   |   | 1 | 0.319   |
| cgd4_1160 | conserved protein with transmembrane region at C-terminus                                                                                                           |   |   |   |   | 1 | 36.075  |
| cgd4_1310 | hypothetical protein with transmembrane domain                                                                                                                      |   |   | 1 |   | 1 | 2.641   |
| cgd4_160  | hypothetical protein, possible transmembrane domain within N-terminus                                                                                               |   |   |   | 1 | 1 | 9.120   |
| cgd4_1670 | hypothetical protein with signal peptide and 3 to 6 transmembrane domains                                                                                           |   | 1 |   |   | 1 | 1.856   |
| cgd4_1760 | hypothetical protein with 2 transmembrane domains                                                                                                                   | 1 |   |   |   | 1 | 0.382   |
| cgd4_1860 | hypothetical protein with 10 transmembrane domains                                                                                                                  |   | 1 |   |   | 1 | 1.436   |
| cgd4_1970 | protein with central transmembrane domain followed by gly-met-pro repeat                                                                                            |   |   | 1 |   | 1 | 4.711   |
| cgd4_2180 | hypothetical protein with 12+ transmembrane domains                                                                                                                 | 1 |   |   |   | 1 | 0.376   |
| cgd4_2420 | extracellular membrane associated protein with a signal peptide, 5 ankyrin repeats, SUSHI domain and a transmembrane region                                         |   | 1 |   |   | 1 | 1.438   |
| cgd4_2430 | hypothetical protein containing a signal peptide and 2 transmembrane domains                                                                                        |   |   |   | 1 | 1 | 11.650  |
| cgd4_2530 | possible transmembrane domain near C                                                                                                                                |   |   |   |   | 1 | 27.238  |
| cgd4_3340 | pleckstrin homology (PH) domain containing protein                                                                                                                  |   |   |   |   | 1 | 68.746  |
| cgd4_3470 | hypothetical protein with signal peptide and transmembrane domain near C, within large locus of signal peptide containing proteins                                  |   | 1 |   |   | 1 | 1.483   |
| cgd4_3480 | hypothetical protein with signal peptide plus possible GPI anchor or transmembrane domain near C-terminus, within large locus of signal peptide containing proteins |   |   |   |   | 1 | 95.528  |
| cgd4_350  | hypothetical protein with 7 transmembrane domains                                                                                                                   | 1 |   |   |   | 1 | 0.440   |
| cgd4_3520 | hypothetical protein with signal peptide and repeats, within large locus of signal peptide containing proteins                                                      | 1 |   |   |   | 1 | 0.450   |
| cgd4_360  | hypothetical protein with 5 transmembrane domains                                                                                                                   | 1 |   |   |   | 1 | 0.457   |
| cgd4_380  | protein with signal peptide plus 12 transmembrane domain protein, possible transporter                                                                              |   |   |   |   | 1 | 55.249  |
| cgd4_3970 | signal peptide plus transmembrane domain or GPI anchor, proline rich, acidic stretches                                                                              |   |   | 1 |   | 1 | 3.008   |
| cgd4_3990 | hypothetical protein with possible transmembrane domain near N-terminus                                                                                             | 1 |   |   |   | 1 | 0.354   |
| cgd4_420  | signal peptide + 4 transmembrane domain protein                                                                                                                     |   |   |   |   | 1 | 132.630 |
| cgd4_4210 | hypothetical protein with signal peptide plus transmembrane domain                                                                                                  |   | 1 |   |   | 1 | 2.085   |
| cgd4_4470 | putative secreted, membrane-associated protein                                                                                                                      |   | 1 |   |   | 1 | 2.226   |
| cgd4_4480 | putative secreted, membrane-associated protein                                                                                                                      | 1 |   |   |   | 1 | 0.344   |
| cgd4_60   | extracellular membrane associated protein with a signal peptide, an EGF domain followed by 10 transmembrane domains                                                 | 1 |   |   |   | 1 | 0.370   |
| cgd4_640  | extracellular protein with a signal peptide, FN3 domain and a predicted transmembrane region                                                                        | 1 |   |   |   | 1 | 0.526   |
| cgd4_750  | extracellular protein with a signal peptide and 8 kazal repeats                                                                                                     | 1 |   |   |   | 1 | 0.438   |

|           |                                                                                                                                              |   |   |   |   |   |         |
|-----------|----------------------------------------------------------------------------------------------------------------------------------------------|---|---|---|---|---|---------|
| cgd4_800  | Yip1p like integral membrane protein                                                                                                         | 1 |   |   |   | 1 | 0.367   |
| cgd4_980  | hypothetical protein with 7 transmembrane domains, possible signal peptide                                                                   |   | 1 |   |   | 1 | 1.580   |
| cgd5_1250 | hypothetical protein with transmembrane domain near N-terminus                                                                               | 1 |   |   |   | 1 | 0.432   |
| cgd5_130  | ferlin like type II membrane associated protein with 5 C2 domains and a transmembrane domain or GPI anchor sequence at the C-terminus        |   | 1 |   |   | 1 | 1.531   |
| cgd5_1560 | hypothetical protein, 2 transmembrane domains near C-terminus                                                                                |   |   |   | 1 | 1 | 11.530  |
| cgd5_1630 | protein with signal peptide, and 11 transmembrane domains                                                                                    |   |   | 1 |   | 1 | 4.479   |
| cgd5_1920 | pleckstrin homology (PH) domain containing protein                                                                                           |   |   | 1 |   | 1 | 2.352   |
| cgd5_1950 | hypothetical protein with 5 transmembrane domains                                                                                            | 1 |   |   |   | 1 | 0.400   |
| cgd5_2020 | extracellular protein                                                                                                                        |   |   | 1 |   | 1 | 2.756   |
| cgd5_2150 | protein with signal peptide and 8 transmembrane domains; possible ZIP zinc transporter family member                                         |   |   |   |   | 1 | 87.906  |
| cgd5_2490 | hypothetical protein with 5 transmembrane domains within C terminus                                                                          | 1 |   |   |   | 1 | 0.395   |
| cgd5_2530 | protein with 12 transmembrane domains, possible apicomplexan-specific protein                                                                | 1 |   |   |   | 1 | 0.413   |
| cgd5_2580 | hypothetical protein with signal peptide, possible transmembrane domain near C-terminus and predicted SMART Znf_C2H2 domain                  |   |   | 1 |   | 1 | 3.155   |
| cgd5_290  | hypothetical protein, 6 transmembrane domains                                                                                                | 1 |   |   |   | 1 | 0.302   |
| cgd5_2990 | hypothetical protein with transmembrane domain within C-terminal region                                                                      |   |   |   |   | 1 | 20.209  |
| cgd5_3130 | large hypothetical protein with 8 or more transmembrane domains                                                                              | 1 |   |   |   | 1 | 0.531   |
| cgd5_3330 | hypothetical protein with 5 transmembrane domains                                                                                            |   |   | 1 |   | 1 | 2.482   |
| cgd5_3500 | hypothetical protein having 10 transmembrane domains                                                                                         |   |   |   |   | 1 | 245.766 |
| cgd5_360  | conserved protein with 2 transmembrane domain                                                                                                | 1 |   |   |   | 1 | 0.331   |
| cgd5_3690 | protein with 8 transmembrane domains                                                                                                         |   |   | 1 |   | 1 | 4.705   |
| cgd5_3970 | protein with 3 transmembrane domains, ring domain, and possible signal peptide                                                               |   | 1 |   |   | 1 | 2.199   |
| cgd5_3980 | hypothetical protein with possible transmembrane domain near N-terminus                                                                      |   | 1 |   |   | 1 | 1.511   |
| cgd5_3990 | protein with 4 transmembrane domains, signal peptide and a RING domain                                                                       |   |   | 1 |   | 1 | 3.176   |
| cgd5_4050 | hypothetical protein with 4 transmembrane domains                                                                                            | 1 |   |   |   | 1 | 0.399   |
| cgd5_4140 | hypothetical protein with 4 transmembrane domains within C-terminus                                                                          | 1 |   |   |   | 1 | 0.417   |
| cgd5_4220 | membrane associated protein with a signal peptide, EGF domain and 7 transmembrane domains at the C-terminus                                  | 1 |   |   |   | 1 | 0.502   |
| cgd5_4270 | hypothetical protein with signal peptide and transmembrane region at C-terminus, possible N-terminal region                                  | 1 |   |   |   | 1 | 0.355   |
| cgd5_4280 | hypothetical protein with signal peptide and possible transmembrane region at C-terminus                                                     | 1 |   |   |   | 1 | 0.494   |
| cgd5_4310 | hypothetical protein with 7 transmembrane domains                                                                                            | 1 |   |   |   | 1 | 0.367   |
| cgd5_4450 | hypothetical protein with 8 transmembrane domains                                                                                            | 1 |   |   |   | 1 | 0.366   |
| cgd5_4470 | CpTSP7; extracellular membrane associated protein with a signal peptide followed by 2 TSP1 repeats, an EGF domain and a transmembrane region | 1 |   |   |   | 1 | 0.332   |
| cgd5_570  | hypothetical protein, 5 transmembrane domains near N-terminus                                                                                | 1 |   |   |   | 1 | 0.303   |
| cgd5_580  | hypothetical protein with 5 transmembrane domains near N-terminus                                                                            | 1 |   |   |   | 1 | 0.463   |
| cgd5_590  | hypothetical protein with possible transmembrane domain within C                                                                             | 1 |   |   |   | 1 | 0.479   |
| cgd6_110  | conserved protein with signal peptide and transmembrane domain or GPI anchor signal near C-terminus                                          | 1 |   |   |   | 1 | 0.415   |
| cgd6_1320 | hypothetical protein, possible transmembrane domain near N-terminus                                                                          |   |   | 1 |   | 1 | 4.625   |
| cgd6_1350 | hypothetical protein with possible transmembrane domain within C-terminus                                                                    | 1 |   |   |   | 1 | 0.350   |
| cgd6_1490 | dbj                                                                                                                                          |   |   |   |   | 1 | 8.143   |
| cgd6_1510 | hypothetical protein with 6 transmembrane domains                                                                                            |   | 1 |   |   | 1 | 1.398   |
| cgd6_2030 | transmembrane protein with 6 transmembrane domains                                                                                           |   |   | 1 |   | 1 | 3.869   |
| cgd6_2120 | hypothetical protein, conserved cysteine residues, possible transmembrane domain or GPI anchor at C-terminus                                 |   |   | 1 |   | 1 | 2.494   |
| cgd6_2130 | hypothetical protein with a C-terminus transmembrane domain                                                                                  |   | 1 |   |   | 1 | 1.513   |
| cgd6_2210 | membrane-associated protein with 6 transmembrane domains possible apicomplexan conserved, duplicated adjacent gene                           |   |   | 1 |   | 1 | 4.047   |
| cgd6_2220 | membrane-associated protein with 6 transmembrane domains possible apicomplexan conserved, duplicated adjacent gene                           |   |   | 1 |   | 1 | 3.262   |
| cgd6_2280 | hypothetical protein with signal peptide and 12 or more transmembrane domains                                                                |   |   |   |   | 1 | 6.014   |
| cgd6_2340 | hypothetical protein with signal peptide and 12 or more transmembrane domains                                                                |   |   |   |   | 1 | 6.891   |
| cgd6_2440 | hypothetical protein having 6 transmembrane domains                                                                                          |   |   |   |   | 1 | 29.134  |
| cgd6_260  | hypothetical protein with 4 transmembrane domains                                                                                            | 1 |   |   |   | 1 | 0.331   |
| cgd6_2620 | vesicle-associated membrane protein, MSP (major sperm protein) domain, transmembrane domain or GPI at C                                      |   |   |   |   | 1 | 63.320  |
| cgd6_2640 | hypothetical protein with 12 transmembrane domains                                                                                           | 1 |   |   |   | 1 | 0.314   |

|           |                                                                                                                                                                 |   |   |   |   |   |         |
|-----------|-----------------------------------------------------------------------------------------------------------------------------------------------------------------|---|---|---|---|---|---------|
| cgd6_2730 | protein with signal peptide plus possible GPI signal or transmembrane domain at C-terminus                                                                      |   |   |   | 1 | 1 | 16.173  |
| cgd6_3020 | hypothetical protein with 8 transmembrane domains                                                                                                               |   |   | 1 |   | 1 | 3.109   |
| cgd6_3350 | hypothetical protein with transmembrane domain                                                                                                                  | 1 |   |   |   | 1 | 0.306   |
| cgd6_3530 | hypothetical protein with possible 4 or more transmembrane domains                                                                                              |   | 1 |   |   | 1 | 1.459   |
| cgd6_3580 | hypothetical protein with 3 or more transmembrane domains                                                                                                       |   |   |   | 1 | 1 | 9.550   |
| cgd6_3630 | secreted protein with ankyrin repeats, signal peptide plus transmembrane domain or GPI anchor                                                                   |   |   | 1 |   | 1 | 1.767   |
| cgd6_3730 | large extracellular protein with a signal peptide, apple domain and a transmembrane region                                                                      |   |   |   | 1 | 1 | 2.950   |
| cgd6_3870 | hypothetical integral membrane protein with 12 transmembrane domains                                                                                            | 1 |   |   |   | 1 | 0.365   |
| cgd6_3910 | pleckstrin homology (PH) domain containing protein                                                                                                              |   |   |   | 1 | 1 | 24.578  |
| cgd6_4310 | hypothetical low complexity                                                                                                                                     | 1 |   |   |   | 1 | 0.417   |
| cgd6_4440 | hypothetical protein with transmembrane region near N-terminus                                                                                                  | 1 |   |   |   | 1 | 0.387   |
| cgd6_4680 | hypothetical protein with 12 transmembrane domains                                                                                                              | 1 |   |   |   | 1 | 0.376   |
| cgd6_4730 | hypothetical protein with 6 transmembrane domains                                                                                                               |   | 1 |   |   | 1 | 2.255   |
| cgd6_4740 | hypothetical protein with 6 transmembrane domains and signal peptide                                                                                            |   |   |   |   | 1 | 29.113  |
| cgd6_4920 | hypothetical protein with 4 transmembrane domains                                                                                                               |   | 1 |   |   | 1 | 2.107   |
| cgd6_5140 | ERGIC-53-like mannose binding lectin that is a type I membrane protein, transmembrane domain near C, signal peptide                                             |   |   |   | 1 | 1 | 5.570   |
| cgd6_5430 | hypothetical protein, signal peptide plus transmembrane domain or GPI anchor                                                                                    |   |   |   |   | 1 | 79.165  |
| cgd6_590  | hypothetical protein with possible transmembrane domain or GPI anchor signal at C-terminus                                                                      | 1 |   |   |   | 1 | 0.367   |
| cgd6_60   | hypothetical protein with signal peptide and proline stretch at C-terminus                                                                                      | 1 |   |   |   | 1 | 0.279   |
| cgd6_670  | extracellular protein with a signal peptide, clostripain like caspase/hemoglobinase domain, notch domain and 2 EGF domains                                      | 1 |   |   |   | 1 | 0.248   |
| cgd6_760  | conserved protein with 6 transmembrane domain                                                                                                                   | 1 |   |   |   | 1 | 0.413   |
| cgd6_780  | CpTSP8, predicted extracellular protein with 3 TSP1 repeats, an EGF domain and a C-terminal transmembrane domain. adjacent TSP domain containing gene.          |   |   |   |   | 1 | 849.606 |
| cgd6_800  | CpTSP9, extracellular protein with 3 TSP1 domains and an EGF domain                                                                                             | 1 |   |   |   | 1 | 0.513   |
| cgd6_90   | hypothetical protein with 5 transmembrane domains                                                                                                               |   |   |   |   | 1 | 68.318  |
| cgd7_1310 | extracellular protein with a signal peptide followed by a family 2 glycosyltransferase and ricin domains                                                        | 1 |   |   |   | 1 | 0.346   |
| cgd7_150  | hypothetical protein with signal peptide and transmembrane domain near C-terminus                                                                               | 1 |   |   |   | 1 | 0.424   |
| cgd7_1650 | protein with signal peptide and 6 transmembrane domains                                                                                                         |   | 1 |   |   | 1 | 1.391   |
| cgd7_1730 | CpCCP1/Cpa135                                                                                                                                                   |   |   |   | 1 | 1 | 6.106   |
| cgd7_1860 | P24 like gold domain protein, possible transmembrane region near C-terminus, signal peptide                                                                     |   | 1 |   |   | 1 | 1.688   |
| cgd7_1960 | membrane protein with multiple cysteines at the N-terminus.                                                                                                     |   |   |   | 1 | 1 | 4.872   |
| cgd7_2150 | transmembrane protein, putative                                                                                                                                 | 1 |   |   |   | 1 | 0.418   |
| cgd7_2170 | hypothetical membrane protein                                                                                                                                   |   |   |   | 1 | 1 | 5.912   |
| cgd7_2590 | integral membrane protein with 10 transmembrane domains                                                                                                         |   | 1 |   |   | 1 | 1.951   |
| cgd7_300  | CpCCP2; extracellular protein with a signal peptide, ricin, discoidin, NEC, LCCL, 2 levanase and an apicomplexan-specific cysteine-rich repeat (apicA repeat)   |   | 1 |   |   | 1 | 1.654   |
| cgd7_3040 | membrane protein conserved in eukaryotes                                                                                                                        |   | 1 |   |   | 1 | 1.729   |
| cgd7_3070 | hypothetical protein, signal peptide, transmembrane domain near C-terminus                                                                                      |   |   |   | 1 | 1 | 19.438  |
| cgd7_3250 | membrane protein with no close homologs,                                                                                                                        |   |   |   |   | 1 | 464.455 |
| cgd7_3380 | putative secreted cysteine rich protein, possible transmembrane domain near C, signal peptide                                                                   |   |   | 1 |   | 1 | 3.418   |
| cgd7_3560 | hypothetical protein, signal peptide, possible 3 transmembrane domains                                                                                          | 1 |   |   |   | 1 | 0.372   |
| cgd7_3910 | cysteine rich protein with two potential transmembrane domain regions                                                                                           | 1 |   |   |   | 1 | 0.374   |
| cgd7_4160 | extracellular protein with a signal peptide followed by family 2 glycosyltransferase and ricin domains                                                          | 1 |   |   |   | 1 | 0.533   |
| cgd7_4310 | extracellular protein with a signal peptide and 4 SCP domains                                                                                                   |   |   | 1 |   | 1 | 3.296   |
| cgd7_4540 | CP15/60 sporozoite 60K protein                                                                                                                                  |   |   | 1 |   | 1 | 4.289   |
| cgd7_4610 | divergent membrane protein                                                                                                                                      |   |   |   | 1 | 1 | 5.624   |
| cgd7_4810 | CpFNPA, extracellular protein with a signal peptide, FN2 domain and an anthrax toxin-N-terminus like domain. starts at second Met with signal peptide following |   |   | 1 |   | 1 | 5.244   |
| cgd7_4880 | signal peptide plus GPI anchored membrane protein                                                                                                               |   |   |   |   | 1 | 36.784  |
| cgd7_4910 | conserved 3 transmembrane domain membrane associated RING finger domain (shared by plants and apicomplexans)                                                    |   |   |   | 1 | 1 | 8.880   |
| cgd7_4920 | membrane protein                                                                                                                                                | 1 |   |   |   | 1 | 0.326   |
| cgd7_5140 | A surface protein with 2 conserved cysteines                                                                                                                    |   | 1 |   |   | 1 | 1.658   |
| cgd7_5430 | possible 2 transmembrane domains, low complexity protein                                                                                                        | 1 |   |   |   | 1 | 0.369   |
| cgd7_5480 | very large membrane protein                                                                                                                                     |   |   |   | 1 | 1 | 5.866   |
| cgd7_550  | hypothetical protein with 9 transmembrane domains, possible apicomplexan-specific protein                                                                       |   |   |   | 1 | 1 | 5.913   |

|         |                |                                                                                                                        |    |    |    |    |    |     |         |
|---------|----------------|------------------------------------------------------------------------------------------------------------------------|----|----|----|----|----|-----|---------|
|         | cgd7_70        | integral membrane protein with 6 transmembrane domains and possible ring domain                                        | 1  |    |    |    |    | 1   | 0.365   |
|         | cgd7_720       | PASILLA splice variant 3-like 2KH domains, transmembrane domain at C-terminus                                          | 1  |    |    |    |    | 1   | 0.530   |
|         | cgd7_900       | hypothetical protein with 3 or more transmembrane domains                                                              | 1  |    |    |    |    | 1   | 0.286   |
|         | cgd7_930       | hypothetical transmembrane protein                                                                                     | 1  |    |    |    |    | 1   | 0.366   |
|         | cgd8_1160      | signal peptide plus His and thr repeats, signal peptide plus transmembrane domain or GPI anchor, predicted mucin       |    |    | 1  |    |    | 1   | 5.490   |
|         | cgd8_150       | CpTSP4; extracellular protein with signal peptide and 2 repeats of an apple domain followed by a TSP1 domain           | 1  |    |    |    |    | 1   | 0.280   |
|         | cgd8_1900      | predicted transmembrane domain, transmembrane domain within N-terminus                                                 | 1  |    |    |    |    | 1   | 0.315   |
|         | cgd8_2280      | uncharacterized protein with 5 transmembrane domain                                                                    |    |    |    |    | 1  | 1   | 40.631  |
|         | cgd8_240       | hypothetical protein with 6 transmembrane domains                                                                      | 1  |    |    |    |    | 1   | 0.563   |
|         | cgd8_2470      | hypothetical protein, signal peptide, 4 transmembrane domains                                                          |    |    |    |    | 1  | 1   | 31.094  |
|         | cgd8_2480      | signal peptide plus possible transmembrane domain paralogs                                                             |    |    |    | 1  |    | 1   | 28.197  |
|         | cgd8_2500      | hypothetical protein, signal peptide, membrane protein, transmembrane domain at C-terminus, paralogs                   |    |    |    | 1  |    | 1   | 7.175   |
|         | cgd8_2790      | pleckstrin homology (PH domain) containing protein                                                                     |    |    |    |    | 1  | 1   | 27.645  |
|         | cgd8_2910      | ferlin-like type II membrane associated protein with 5 C2 domains, transmembrane domain or GPI anchor at C-terminus    | 1  |    |    |    |    | 1   | 0.374   |
|         | cgd8_2950      | cervisiae Yh1017wp/PTM1 like protein; signal peptide plus 7 pass transmembrane regions                                 |    | 1  |    |    |    | 1   | 1.639   |
|         | cgd8_3000      | SYG1/ ERD1 like integral membrane protein required for retention of ER lumen proteins, with 8-10 transmembrane domains |    |    |    |    | 1  | 1   | 15.278  |
|         | cgd8_3470      | membrane associated protein with a RING finger, 4xtransmembrane domain                                                 |    |    |    |    | 1  | 1   | 215.651 |
|         | cgd8_3620      | hypothetical protein with 6 transmembrane domains                                                                      | 1  |    |    |    |    | 1   | 0.528   |
|         | cgd8_3760      | predicted membrane associated protein, signal peptide, transmembrane domain near C                                     |    |    | 1  |    |    | 1   | 2.684   |
|         | cgd8_3890      | membrane protein with signal peptide plus 12x transmembrane domains                                                    |    |    |    | 1  |    | 1   | 13.850  |
|         | cgd8_3920      | hypothetical protein, signal peptide, predicted membrane protein, transmembrane domain near C-terminus                 | 1  |    |    |    |    | 1   | 0.387   |
|         | cgd8_4090      | hypothetical protein, signal peptide + 5 transmembrane domains                                                         |    |    |    |    | 1  | 1   | 28.561  |
|         | cgd8_4160      | hypothetical protein, transmembrane domain                                                                             |    |    | 1  |    |    | 1   | 3.755   |
|         | cgd8_4410      | hypothetical protein, possible transmembrane domain                                                                    |    |    |    | 1  |    | 1   | 16.317  |
|         | cgd8_4440      | protein with 12x transmembrane regions                                                                                 | 1  |    |    |    |    | 1   | 0.404   |
|         | cgd8_4880      | 3 transmembrane region protein                                                                                         |    |    |    |    | 1  | 1   | 124.333 |
|         | cgd8_5090      | hypothetical protein, possible transmembrane domain within N-terminus                                                  | 1  |    |    |    |    | 1   | 0.427   |
|         | cgd8_5140      | possible coated vesicle proteins, emp24/gp25L/p24 family, signal peptide, possible transmembrane domain at C-terminus  | 1  |    |    |    |    | 1   | 0.340   |
|         | cgd8_5200      | 5 transmembrane domain protein                                                                                         |    |    |    |    | 1  | 1   | 47.298  |
|         | cgd8_5220      | signal peptide, 4+ transmembrane domains                                                                               | 1  |    |    |    |    | 1   | 0.367   |
|         | cgd8_5270      | integral membrane protein predicted amino acid permease, 11x transmembrane domains                                     | 1  |    |    |    |    | 1   | 0.371   |
|         | cgd8_530       | hypothetical protein with 4 transmembrane domains                                                                      |    | 1  |    |    |    | 1   | 1.952   |
|         | cgd8_540       | CpTSP12; extracellular protein with 1 TSP1 domain                                                                      | 1  |    |    |    |    | 1   | 0.435   |
|         | cgd8_60        | signal peptide, possible transmembrane domain near N                                                                   |    |    |    |    | 1  | 1   | 175.821 |
|         | cgd8_850       | predicted membrane associated protein with 8 transmembrane domains                                                     | 1  |    |    |    |    | 1   | 0.484   |
|         | Membrane Total |                                                                                                                        | 92 | 41 | 36 | 33 | 34 | 236 | 21.029  |
| Unknown | cgd1_100       | hypothetical protein                                                                                                   | 1  |    |    |    |    | 1   | 0.413   |
|         | cgd1_1000      | hypothetical protein                                                                                                   | 1  |    |    |    |    | 1   | 0.377   |
|         | cgd1_1020      | hypothetical protein                                                                                                   | 1  |    |    |    |    | 1   | 0.422   |
|         | cgd1_1040      | hypothetical protein                                                                                                   | 1  |    |    |    |    | 1   | 0.386   |
|         | cgd1_1060      | hypothetical protein                                                                                                   | 1  |    |    |    |    | 1   | 0.433   |
|         | cgd1_1070      | RRM domain protein                                                                                                     |    |    | 1  |    |    | 1   | 3.300   |
|         | cgd1_110       | predicted secreted protein, signal peptide, paralogs                                                                   |    |    |    |    | 1  | 1   | 10.376  |
|         | cgd1_1150      | hypothetical protein                                                                                                   | 1  |    |    |    |    | 1   | 0.360   |
|         | cgd1_1190      | hypothetical protein                                                                                                   | 1  |    |    |    |    | 1   | 0.350   |
|         | cgd1_1200      | hypothetical protein                                                                                                   |    |    |    |    | 1  | 1   | 220.734 |
|         | cgd1_1240      | Sec14 domain containing protein                                                                                        | 1  |    |    |    |    | 1   | 0.465   |
|         | cgd1_1250      | predicted secreted protein, signal peptide                                                                             | 1  |    |    |    |    | 1   | 0.400   |
|         | cgd1_1260      | hypothetical protein                                                                                                   | 1  |    |    |    |    | 1   | 0.348   |
|         | cgd1_1290      | apicomplexa specific secreted protein Pf (23508265), signal peptide                                                    |    |    |    | 1  |    | 1   | 16.723  |
|         | cgd1_130       | signal peptide, predicted secreted protein with a cysteine cluster at the C-terminus                                   |    |    |    |    | 1  | 1   | 51.078  |
|         | cgd1_1320      | developmental protein, putative                                                                                        | 1  |    |    |    |    | 1   | 0.426   |
|         | cgd1_1390      | hypothetical protein                                                                                                   | 1  |    |    |    |    | 1   | 0.424   |
|         | cgd1_1400      | hypothetical protein                                                                                                   | 1  |    |    |    |    | 1   | 0.418   |
|         | cgd1_1430      | hypothetical protein                                                                                                   | 1  |    |    |    |    | 1   | 0.425   |
|         | cgd1_1440      | hypothetical protein                                                                                                   |    | 1  |    |    |    | 1   | 1.758   |
|         | cgd1_1450      | predicted secreted protein, signal peptide                                                                             |    |    |    |    | 1  | 1   | 42.773  |
|         | cgd1_1460      | hypothetical protein                                                                                                   | 1  |    |    |    |    | 1   | 0.466   |
|         | cgd1_1490      | NEK2 protein, putative                                                                                                 | 1  |    |    |    |    | 1   | 0.447   |
|         | cgd1_150       | predicted secreted protein, signal peptide                                                                             |    |    | 1  |    |    | 1   | 3.693   |

|           |                                                                                                                                                                                                          |   |  |   |  |   |   |         |
|-----------|----------------------------------------------------------------------------------------------------------------------------------------------------------------------------------------------------------|---|--|---|--|---|---|---------|
| cgd1_1500 | hypothetical protein                                                                                                                                                                                     |   |  | 1 |  |   | 1 | 1.336   |
| cgd1_1510 | predicted secreted protein, signal peptide                                                                                                                                                               |   |  | 1 |  |   | 1 | 1.523   |
| cgd1_1590 | hypothetical protein                                                                                                                                                                                     |   |  |   |  | 1 | 1 | 22.164  |
| cgd1_1600 | histidine triad (HIT) family zinc binding protein                                                                                                                                                        |   |  |   |  | 1 | 1 | 123.796 |
| cgd1_1630 | hypothetical protein                                                                                                                                                                                     |   |  |   |  | 1 | 1 | 8.652   |
| cgd1_1650 | hypothetical protein                                                                                                                                                                                     | 1 |  |   |  |   | 1 | 0.438   |
| cgd1_1690 | PHD finger containing protein                                                                                                                                                                            | 1 |  |   |  |   | 1 | 0.450   |
| cgd1_170  | hypothetical protein                                                                                                                                                                                     | 1 |  |   |  |   | 1 | 0.478   |
| cgd1_1740 | hypothetical coiled coil protein                                                                                                                                                                         | 1 |  |   |  |   | 1 | 0.338   |
| cgd1_1780 | hypothetical protein                                                                                                                                                                                     |   |  | 1 |  |   | 1 | 1.997   |
| cgd1_1790 | RING-H2 finger containing membrane associated protein, 8x transmembrane domain                                                                                                                           | 1 |  |   |  |   | 1 | 0.621   |
| cgd1_1810 | hypothetical protein                                                                                                                                                                                     | 1 |  |   |  |   | 1 | 0.381   |
| cgd1_1840 | hypothetical protein                                                                                                                                                                                     |   |  |   |  | 1 | 1 | 151.632 |
| cgd1_1850 | G-patch domain containing protein                                                                                                                                                                        | 1 |  |   |  |   | 1 | 0.407   |
| cgd1_1880 | hypothetical protein                                                                                                                                                                                     | 1 |  |   |  |   | 1 | 0.305   |
| cgd1_190  | narf-like protein nuclear prelamin A recognition factor                                                                                                                                                  | 1 |  |   |  |   | 1 | 0.482   |
| cgd1_1920 | large protein with a SPRY domain and HECT domain                                                                                                                                                         |   |  | 1 |  |   | 1 | 2.524   |
| cgd1_1940 | possible RAN guanine nucleotide release factor                                                                                                                                                           |   |  | 1 |  |   | 1 | 4.637   |
| cgd1_1950 | hypothetical protein                                                                                                                                                                                     |   |  |   |  | 1 | 1 | 25.027  |
| cgd1_1970 | hypothetical protein                                                                                                                                                                                     |   |  | 1 |  |   | 1 | 3.612   |
| cgd1_1990 | hypothetical protein                                                                                                                                                                                     |   |  | 1 |  |   | 1 | 3.460   |
| cgd1_2000 | predicted coiled coil protein                                                                                                                                                                            |   |  |   |  | 1 | 1 | 86.923  |
| cgd1_2070 | hypothetical protein                                                                                                                                                                                     | 1 |  |   |  |   | 1 | 0.460   |
| cgd1_2140 | hypothetical protein                                                                                                                                                                                     |   |  | 1 |  |   | 1 | 1.803   |
| cgd1_2150 | hypothetical protein with GYF domain at the amino terminus                                                                                                                                               | 1 |  |   |  |   | 1 | 0.361   |
| cgd1_2160 | hypothetical protein with BTB/POZ domain and GYF domain                                                                                                                                                  | 1 |  |   |  |   | 1 | 0.368   |
| cgd1_2170 | SET domain containing protein with a cysteine cluster at the C-terminus                                                                                                                                  |   |  |   |  | 1 | 1 | 11.333  |
| cgd1_2200 | hypothetical protein                                                                                                                                                                                     | 1 |  |   |  |   | 1 | 0.326   |
| cgd1_2210 | hypothetical protein                                                                                                                                                                                     |   |  | 1 |  |   | 1 | 1.721   |
| cgd1_2230 | WD40 protein Ciao1                                                                                                                                                                                       | 1 |  |   |  |   | 1 | 0.357   |
| cgd1_2240 | AT hook motif protein, putative                                                                                                                                                                          | 1 |  |   |  |   | 1 | 0.684   |
| cgd1_2290 | predicted coiled coil protein                                                                                                                                                                            |   |  | 1 |  |   | 1 | 1.339   |
| cgd1_2310 | unnamed protein product                                                                                                                                                                                  |   |  | 1 |  |   | 1 | 1.643   |
| cgd1_2330 | hypothetical protein with predicted SANT domain                                                                                                                                                          |   |  | 1 |  |   | 1 | 1.250   |
| cgd1_2340 | hypothetical protein                                                                                                                                                                                     | 1 |  |   |  |   | 1 | 0.309   |
| cgd1_2350 | hypothetical protein                                                                                                                                                                                     |   |  |   |  | 1 | 1 | 16.095  |
| cgd1_2390 | hypothetical secreted/membrane associated protein signal peptide plus possible GPI signal                                                                                                                |   |  | 1 |  |   | 1 | 1.927   |
| cgd1_240  | predicted secreted protein                                                                                                                                                                               |   |  |   |  | 1 | 1 | 5.573   |
| cgd1_2400 | signal peptide, secreted protein                                                                                                                                                                         |   |  |   |  | 1 | 1 | 226.789 |
| cgd1_2440 | eukaryotic orthologous group, signal peptide                                                                                                                                                             | 1 |  | 1 |  |   | 2 | 1.052   |
| cgd1_2460 | hypothetical protein                                                                                                                                                                                     |   |  |   |  | 1 | 1 | 47.223  |
| cgd1_2480 | hypothetical protein                                                                                                                                                                                     |   |  |   |  | 1 | 1 | 3.837   |
| cgd1_2500 | signal recognition particle SPR68                                                                                                                                                                        | 1 |  |   |  |   | 1 | 0.467   |
| cgd1_2520 | hypothetical protein                                                                                                                                                                                     | 1 |  |   |  |   | 1 | 0.463   |
| cgd1_2570 | possible conserved eukaryotic alpha beta hydrolase                                                                                                                                                       |   |  | 1 |  |   | 1 | 2.339   |
| cgd1_2590 | PGPD14 protein with at least one predicted RING finger, possible plant origin                                                                                                                            | 1 |  |   |  |   | 1 | 0.340   |
| cgd1_260  | predicted secreted protein, signal peptide                                                                                                                                                               | 1 |  |   |  |   | 1 | 0.380   |
| cgd1_2610 | hypothetical protein                                                                                                                                                                                     | 1 |  |   |  |   | 1 | 0.401   |
| cgd1_2650 | hypothetical protein                                                                                                                                                                                     |   |  | 1 |  |   | 1 | 1.890   |
| cgd1_2670 | ankyrin-related protein, putative                                                                                                                                                                        |   |  | 1 |  |   | 1 | 1.765   |
| cgd1_2790 | hypothetical protein                                                                                                                                                                                     | 1 |  |   |  |   | 1 | 0.308   |
| cgd1_2810 | S. pombe like (SPAC1805) eukaryotic protein with a possible metal binding domain at the N-terminus                                                                                                       | 1 |  |   |  |   | 1 | 0.308   |
| cgd1_2860 | hypothetical protein                                                                                                                                                                                     | 1 |  |   |  |   | 1 | 0.386   |
| cgd1_2870 | N-terminal domain cerevisiae Yos9p-like that is involved in GPI-anchored protein transport in the golgi, a cation independent mannose-6-po4 receptor like conserved Cys motif and a C-terminal E. coli y | 1 |  |   |  |   | 1 | 0.609   |
| cgd1_2900 | hypothetical protein                                                                                                                                                                                     |   |  | 1 |  |   | 1 | 2.824   |
| cgd1_2930 | hypothetical protein                                                                                                                                                                                     | 1 |  |   |  |   | 1 | 0.395   |
| cgd1_2940 | hypothetical protein                                                                                                                                                                                     | 1 |  |   |  |   | 1 | 0.335   |
| cgd1_2950 | hypothetical protein                                                                                                                                                                                     |   |  |   |  | 1 | 1 | 5.829   |
| cgd1_3030 | hypothetical protein containing WD40 repeats fused to a RING finger                                                                                                                                      | 1 |  | 1 |  |   | 2 | 0.842   |
| cgd1_3090 | very low complexity hypothetical protein, possible unreal ORF                                                                                                                                            | 1 |  |   |  |   | 1 | 0.239   |
| cgd1_3100 | hypothetical protein                                                                                                                                                                                     |   |  | 1 |  |   | 1 | 1.628   |
| cgd1_3110 | hypothetical protein                                                                                                                                                                                     | 1 |  |   |  |   | 1 | 0.295   |
| cgd1_3120 | peptide synthase like condensation domain                                                                                                                                                                | 1 |  |   |  |   | 1 | 0.393   |
| cgd1_3180 | hypothetical protein                                                                                                                                                                                     | 1 |  |   |  |   | 1 | 0.394   |
| cgd1_3220 | erythrocyte membrane-associated antigen                                                                                                                                                                  | 1 |  |   |  |   | 1 | 0.364   |
| cgd1_3260 | hypothetical protein                                                                                                                                                                                     |   |  |   |  | 1 | 1 | 6.565   |
| cgd1_3270 | hypothetical protein                                                                                                                                                                                     |   |  |   |  | 1 | 1 | 59.300  |
| cgd1_3280 | hypothetical protein                                                                                                                                                                                     |   |  | 1 |  |   | 1 | 4.890   |
| cgd1_3300 | ring domain protein                                                                                                                                                                                      |   |  | 1 |  |   | 1 | 2.979   |

|           |                                                                                                                                    |   |   |   |   |   |           |
|-----------|------------------------------------------------------------------------------------------------------------------------------------|---|---|---|---|---|-----------|
| cgd1_3320 | ring domain protein                                                                                                                | 1 |   |   |   | 1 | 0.346     |
| cgd1_3330 | hypothetical protein                                                                                                               | 1 |   |   |   | 1 | 0.323     |
| cgd1_3350 | hypothetical protein                                                                                                               | 1 |   |   |   | 1 | 0.279     |
| cgd1_3360 | predicted AFG1 ATPase family AAAATpase                                                                                             | 1 |   |   |   | 1 | 0.386     |
| cgd1_3400 | hypothetical protein                                                                                                               |   | 1 |   |   | 1 | 1.981     |
| cgd1_3430 | hypothetical protein                                                                                                               | 1 |   |   |   | 1 | 0.414     |
| cgd1_3450 | hypothetical protein                                                                                                               |   | 1 |   |   | 1 | 1.340     |
| cgd1_3520 | hypothetical protein                                                                                                               |   |   | 1 |   | 1 | 2.558     |
| cgd1_3540 | TPR repeat protein                                                                                                                 |   |   |   | 1 | 1 | 13.434    |
| cgd1_3560 | hypothetical protein                                                                                                               | 1 |   |   |   | 1 | 0.345     |
| cgd1_3580 | hypothetical protein                                                                                                               | 1 |   |   |   | 1 | 0.511     |
| cgd1_3640 | hypothetical protein, signal peptide                                                                                               |   |   |   | 1 | 1 | 87.129    |
| cgd1_3650 | hypothetical protein, signal peptide                                                                                               |   |   |   | 1 | 1 | 34.068    |
| cgd1_3660 | hypothetical protein                                                                                                               | 1 |   |   |   | 1 | 0.577     |
| cgd1_3740 | ankyrin repeat protein with over 9 transmembrane domains at C-terminus, signal peptide                                             | 1 |   |   |   | 1 | 0.330     |
| cgd1_3760 | hypothetical coiled coil protein                                                                                                   | 1 |   |   |   | 1 | 0.293     |
| cgd1_3770 | hypothetical protein                                                                                                               |   |   |   | 1 | 1 | 79.010    |
| cgd1_3790 | hypothetical protein, signal peptide                                                                                               |   |   |   | 1 | 1 | 6.004     |
| cgd1_3830 | hypothetical protein                                                                                                               | 1 |   |   |   | 1 | 0.495     |
| cgd1_3860 | hypothetical protein                                                                                                               |   |   |   | 1 | 1 | 98.631    |
| cgd1_440  | hypothetical protein                                                                                                               |   |   | 1 |   | 1 | 3.025     |
| cgd1_450  | hypothetical protein                                                                                                               |   | 1 |   |   | 1 | 1.937     |
| cgd1_460  | hypothetical protein                                                                                                               | 1 |   |   |   | 1 | 0.422     |
| cgd1_470  | predicted secreted protein, signal peptide, low complexity serine-threonine rich, possible mucin                                   |   |   |   | 1 | 1 | 5.540     |
| cgd1_490  | hypothetical protein                                                                                                               | 1 |   |   |   | 1 | 0.474     |
| cgd1_50   | hypothetical protein with 2 TPR domains                                                                                            | 1 |   |   |   | 1 | 0.366     |
| cgd1_500  | hypothetical protein                                                                                                               | 1 |   |   |   | 1 | 0.472     |
| cgd1_510  | hypothetical protein                                                                                                               | 1 |   |   |   | 1 | 0.406     |
| cgd1_530  | hypothetical protein                                                                                                               |   |   |   | 1 | 1 | 38.741    |
| cgd1_560  | hypothetical protein                                                                                                               |   | 1 |   |   | 1 | 1.484     |
| cgd1_570  | predicted secreted protein, signal peptide                                                                                         | 1 |   |   |   | 1 | 0.373     |
| cgd1_590  | hypothetical protein, proline rich C-terminus, signal peptide, very large protein                                                  | 1 | 1 |   |   | 2 | 1.176     |
| cgd1_610  | hypothetical protein                                                                                                               |   |   |   | 1 | 1 | 12.825    |
| cgd1_620  | hypothetical protein                                                                                                               |   | 1 |   |   | 1 | 1.485     |
| cgd1_630  | hypothetical protein                                                                                                               |   |   | 1 |   | 1 | 3.936     |
| cgd1_640  | signal peptide, large protein                                                                                                      |   |   |   | 1 | 1 | 1,146.669 |
| cgd1_650  | predicted secreted protein, signal peptide                                                                                         | 1 |   |   |   | 1 | 0.390     |
| cgd1_660  | predicted secreted protein, signal peptide                                                                                         | 1 |   |   |   | 1 | 0.646     |
| cgd1_670  | predicted secreted protein, signal peptide                                                                                         |   | 1 |   |   | 1 | 1.525     |
| cgd1_680  | hypothetical protein                                                                                                               |   |   |   | 1 | 1 | 26.652    |
| cgd1_690  | hypothetical protein                                                                                                               |   | 1 |   |   | 1 | 1.966     |
| cgd1_70   | hypothetical protein                                                                                                               |   | 1 |   |   | 1 | 1.461     |
| cgd1_710  | coiled coil protein                                                                                                                |   |   |   | 1 | 1 | 5.831     |
| cgd1_740  | hypothetical protein                                                                                                               | 1 |   |   |   | 1 | 0.475     |
| cgd1_910  | ZnF A20 and Znf AN1 domains, involved in signaling                                                                                 |   |   |   | 1 | 1 | 249.040   |
| cgd1_940  | hypothetical protein                                                                                                               | 1 |   |   |   | 1 | 0.632     |
| cgd1_960  | RING finger containing protein                                                                                                     |   |   |   | 1 | 1 | 2.614     |
| cgd1_970  | RING finger containing protein                                                                                                     |   |   |   | 1 | 1 | 4.263     |
| cgd2_10   | hypothetical protein                                                                                                               | 1 |   |   |   | 1 | 0.349     |
| cgd2_1040 | flavo-hemoprotein b5+b5R (DJ676J13.1) (flavo-hemoprotein b5+b5R cytochrome b-type NAD(P)H oxidoreductase), putative signal peptide | 1 |   |   |   | 1 | 0.363     |
| cgd2_1050 | hypothetical protein                                                                                                               |   |   |   | 1 | 1 | 65.673    |
| cgd2_1080 | hypothetical protein                                                                                                               |   | 1 |   |   | 1 | 1.289     |
| cgd2_1110 | silencer-associated factor, putative                                                                                               | 1 |   |   |   | 1 | 0.360     |
| cgd2_1130 | hypothetical protein                                                                                                               | 1 |   |   |   | 1 | 0.400     |
| cgd2_1150 | hypothetical protein                                                                                                               |   |   |   | 1 | 1 | 41.522    |
| cgd2_1170 | zinc finger protein                                                                                                                |   |   |   | 1 | 1 | 12.855    |
| cgd2_1230 | hypothetical protein                                                                                                               |   |   | 1 |   | 1 | 2.711     |
| cgd2_1260 | hypothetical protein                                                                                                               | 1 |   |   |   | 1 | 0.436     |
| cgd2_1280 | hypothetical protein                                                                                                               | 1 |   |   |   | 1 | 0.405     |
| cgd2_1370 | hypothetical coiled coil protein                                                                                                   |   |   |   | 1 | 1 | 4.253     |
| cgd2_1380 | hypothetical protein                                                                                                               | 1 |   |   |   | 1 | 0.498     |
| cgd2_1390 | hypothetical protein                                                                                                               |   |   |   | 1 | 1 | 3.279     |
| cgd2_1410 | possible domain KOG3410, conserved alpha-helical protein                                                                           |   |   |   | 1 | 1 | 29.743    |
| cgd2_1420 | hypothetical protein                                                                                                               |   |   |   | 1 | 1 | 13.272    |
| cgd2_1470 | hypothetical protein                                                                                                               | 1 |   |   |   | 1 | 0.434     |
| cgd2_1490 | hypothetical protein with signal peptide and 7 transmembrane domains                                                               | 1 |   |   |   | 1 | 0.381     |
| cgd2_1520 | hypothetical protein                                                                                                               |   |   |   | 1 | 1 | 93.538    |
| cgd2_1560 | hypothetical protein                                                                                                               |   | 1 |   |   | 1 | 1.795     |
| cgd2_1670 | ING1 like protein with an N-terminal globular domain and a PHD domain                                                              | 1 |   |   |   | 1 | 0.296     |
| cgd2_1680 | hypothetical protein                                                                                                               |   |   |   | 1 | 1 | 6.113     |
| cgd2_1720 | hypothetical protein                                                                                                               | 1 |   |   |   | 1 | 0.350     |



|           |                                                                             |   |   |   |   |   |         |
|-----------|-----------------------------------------------------------------------------|---|---|---|---|---|---------|
| cgd2_1730 | hypothetical protein                                                        | 1 |   |   |   | 1 | 0.418   |
| cgd2_1740 | RSC8 ortholog with a swirm domain, ZZ finger and Myb                        |   |   | 1 |   | 1 | 2.541   |
| cgd2_1750 | ring domain                                                                 |   | 1 |   |   | 1 | 1.608   |
| cgd2_1790 | hypothetical protein                                                        |   |   | 1 |   | 1 | 4.008   |
| cgd2_180  | hypothetical protein                                                        |   |   |   | 1 | 1 | 7.810   |
| cgd2_1820 | hypothetical protein                                                        |   |   |   | 1 | 1 | 24.622  |
| cgd2_1830 | hypothetical protein                                                        | 1 | 1 |   |   | 2 | 1.202   |
| cgd2_1840 | signal peptide                                                              |   |   |   | 1 | 1 | 133.856 |
| cgd2_1860 | TBC domain containing protein                                               |   |   | 1 |   | 1 | 5.556   |
| cgd2_1870 | guanine nucleotide-binding protein, putative                                |   |   |   | 1 | 1 | 66.422  |
| cgd2_1890 | hypothetical protein                                                        |   | 1 |   |   | 1 | 1.504   |
| cgd2_1920 | hypothetical protein                                                        | 1 |   |   |   | 1 | 0.324   |
| cgd2_1950 | SAP+PHD+MIZ domains containing protein                                      | 1 |   |   |   | 1 | 0.468   |
| cgd2_1970 | hypothetical protein                                                        | 1 |   |   |   | 1 | 0.374   |
| cgd2_1980 | hypothetical protein                                                        |   | 1 |   |   | 1 | 1.526   |
| cgd2_2010 | hypothetical protein                                                        | 1 |   |   |   | 1 | 0.628   |
| cgd2_2020 | hypothetical protein                                                        | 1 |   |   |   | 1 | 0.443   |
| cgd2_2080 | hypothetical protein                                                        |   | 1 |   |   | 1 | 1.483   |
| cgd2_2100 | hypothetical protein, possible signal peptide                               |   |   | 1 |   | 1 | 2.637   |
| cgd2_2110 | hypothetical protein, possible signal peptide                               |   |   | 1 |   | 1 | 2.406   |
| cgd2_2150 | hypothetical protein                                                        |   |   | 1 |   | 1 | 3.148   |
| cgd2_2180 | hypothetical protein                                                        |   | 1 |   |   | 1 | 1.494   |
| cgd2_2270 | hypothetical protein, signal peptide                                        |   | 1 |   |   | 1 | 1.380   |
| cgd2_2330 | hypothetical protein                                                        | 1 |   |   |   | 1 | 0.345   |
| cgd2_2350 | MA3 domain containing protein                                               |   |   |   | 1 | 1 | 34.524  |
| cgd2_2360 | Dop1p family protein                                                        | 1 |   |   |   | 1 | 0.581   |
| cgd2_2370 | hypothetical protein                                                        | 1 |   |   |   | 1 | 0.329   |
| cgd2_2380 | hypothetical protein                                                        | 1 |   |   |   | 1 | 0.471   |
| cgd2_2410 | SSM4 like RING finger protein                                               |   |   |   | 1 | 1 | 10.936  |
| cgd2_2440 | hypothetical protein                                                        |   |   |   | 1 | 1 | 123.210 |
| cgd2_2450 | hypothetical protein                                                        |   |   |   | 1 | 1 | 29.351  |
| cgd2_2460 | hypothetical protein                                                        |   | 1 |   |   | 1 | 2.039   |
| cgd2_2520 | hypothetical protein                                                        |   |   |   | 1 | 1 | 14.384  |
| cgd2_2530 | hypothetical protein, signal peptide                                        |   |   | 1 |   | 1 | 4.807   |
| cgd2_2550 | hypothetical protein, signal peptide                                        | 1 | 1 |   |   | 2 | 1.117   |
| cgd2_2560 | hypothetical protein, signal peptide                                        |   |   |   | 1 | 1 | 57.962  |
| cgd2_2570 | hypothetical protein, possible signal peptide                               |   |   |   | 1 | 1 | 31.925  |
| cgd2_2580 | hypothetical protein                                                        |   |   | 1 |   | 1 | 4.451   |
| cgd2_2590 | hypothetical protein                                                        | 1 |   |   |   | 1 | 0.323   |
| cgd2_260  | hypothetical protein                                                        |   |   |   | 1 | 1 | 94.265  |
| cgd2_2600 | hypothetical protein                                                        |   |   |   | 1 | 1 | 6.383   |
| cgd2_2620 | hypothetical protein                                                        |   | 1 |   |   | 1 | 2.236   |
| cgd2_2640 | hypothetical protein                                                        |   |   | 1 |   | 1 | 3.430   |
| cgd2_2690 | hypothetical protein                                                        |   |   |   | 1 | 1 | 20.841  |
| cgd2_2700 | Brf1p like coiled coil protein                                              |   |   | 1 |   | 1 | 5.475   |
| cgd2_2720 | ARM repeat protein                                                          |   |   | 1 |   | 1 | 3.969   |
| cgd2_2740 | hypothetical protein                                                        |   |   |   | 1 | 1 | 7.770   |
| cgd2_2800 | THUMP RNA binding domain containing protein, Yg1232wp-like                  |   |   | 1 |   | 1 | 2.839   |
| cgd2_2850 | hypothetical protein, possible signal peptide                               | 1 |   |   |   | 1 | 0.435   |
| cgd2_290  | hypothetical protein                                                        | 1 |   |   |   | 1 | 0.432   |
| cgd2_2910 | large WD repeat protein                                                     |   |   | 1 |   | 1 | 4.738   |
| cgd2_2930 | hypothetical protein                                                        |   | 1 |   |   | 1 | 1.729   |
| cgd2_2950 | ring domain at very C-terminus of large protein                             |   | 1 |   |   | 1 | 1.474   |
| cgd2_2980 | hypothetical protein                                                        |   |   | 1 |   | 1 | 4.842   |
| cgd2_300  | kelch repeat-containing proteins that is fused to a HSP90-like ATPase       | 1 |   |   |   | 1 | 0.396   |
| cgd2_3020 | hypothetical protein                                                        | 1 |   |   |   | 1 | 0.525   |
| cgd2_3030 | hypothetical protein, signal peptide                                        | 1 |   |   |   | 1 | 0.423   |
| cgd2_3050 | hypothetical protein                                                        |   | 1 |   |   | 1 | 1.643   |
| cgd2_3060 | hypothetical protein                                                        |   |   | 1 |   | 1 | 3.288   |
| cgd2_3090 | hypothetical protein containing a signal peptide                            |   |   |   | 1 | 1 | 7.387   |
| cgd2_3110 | hypothetical protein containing a signal peptide                            |   |   |   | 1 | 1 | 147.737 |
| cgd2_3130 | hypothetical protein with possible transcriptional repressor EZH1 domain    | 1 |   |   |   | 1 | 0.507   |
| cgd2_3140 | hypothetical protein                                                        | 1 |   |   |   | 1 | 0.478   |
| cgd2_3160 | hypothetical protein                                                        | 1 |   |   |   | 1 | 0.338   |
| cgd2_3210 | hypothetical protein                                                        |   |   | 1 |   | 1 | 2.672   |
| cgd2_3220 | Sc6p-like, SM domain                                                        |   |   |   | 1 | 1 | 10.398  |
| cgd2_3240 | ARF GAP-like zinc finger-containing protein                                 | 1 |   |   |   | 1 | 0.597   |
| cgd2_3250 | 3x TPR domain-containing protein                                            |   | 1 |   |   | 1 | 1.843   |
| cgd2_3280 | hypothetical protein                                                        | 1 |   |   |   | 1 | 0.251   |
| cgd2_3290 | hypothetical protein with a signal peptide plus thr stretch, possible mucin |   |   |   | 1 | 1 | 25.356  |
| cgd2_330  | notchless                                                                   |   |   |   | 1 | 1 | 10.941  |
| cgd2_3300 | hypothetical protein                                                        | 1 |   |   |   | 1 | 0.288   |
| cgd2_3310 | hypothetical protein                                                        |   | 1 |   |   | 1 | 1.874   |

|           |                                                                                                         |   |  |   |   |   |         |
|-----------|---------------------------------------------------------------------------------------------------------|---|--|---|---|---|---------|
| cgd2_3350 | hypothetical protein                                                                                    |   |  | 1 |   | 1 | 2.668   |
| cgd2_3360 | hypothetical protein                                                                                    | 1 |  |   |   | 1 | 0.383   |
| cgd2_340  | signal peptide, large protein                                                                           |   |  |   | 1 | 1 | 6.139   |
| cgd2_3430 | SDA1-like protein                                                                                       |   |  |   | 1 | 1 | 24.345  |
| cgd2_3460 | C- terminal region conserved, zinc finger, myb DNA binding domain                                       | 1 |  |   |   | 1 | 0.386   |
| cgd2_3490 | protein with low complexity regions and an apicomplexan specific domain                                 |   |  | 1 |   | 1 | 3.475   |
| cgd2_3530 | possible RNA binding motif, signal peptide                                                              | 1 |  |   |   | 1 | 0.316   |
| cgd2_3610 | 2x WD domain containing protein                                                                         | 1 |  |   |   | 1 | 0.417   |
| cgd2_3630 | hypothetical protein                                                                                    | 1 |  |   |   | 1 | 0.500   |
| cgd2_3640 | hypothetical protein with region conserved in apicomplexa                                               |   |  |   |   | 1 | 26.158  |
| cgd2_3690 | WD repeat protein                                                                                       |   |  | 1 |   | 1 | 2.648   |
| cgd2_3710 | Pfa MAL6P1.309 like protein                                                                             | 1 |  |   |   | 1 | 0.418   |
| cgd2_3720 | hypothetical protein                                                                                    | 1 |  |   |   | 1 | 0.435   |
| cgd2_3740 | hypothetical protein, signal peptide                                                                    | 1 |  |   |   | 1 | 0.482   |
| cgd2_3780 | uncharacterized protein rich in Thr and Ser residues                                                    |   |  | 1 |   | 1 | 1.793   |
| cgd2_3800 | hypothetical protein                                                                                    | 1 |  |   |   | 1 | 0.421   |
| cgd2_3820 | hypothetical protein                                                                                    | 1 |  |   |   | 1 | 0.307   |
| cgd2_3830 | hypothetical protein                                                                                    |   |  |   | 1 | 1 | 3.677   |
| cgd2_3840 | hypothetical protein                                                                                    |   |  | 1 |   | 1 | 1.645   |
| cgd2_3850 | possible FH2 formin homology domain                                                                     | 1 |  |   |   | 1 | 0.299   |
| cgd2_3860 | BBOX Zn finger domain containing protein                                                                |   |  | 1 |   | 1 | 2.050   |
| cgd2_390  | hypothetical protein                                                                                    |   |  | 1 |   | 1 | 1.817   |
| cgd2_3910 | hypothetical protein                                                                                    |   |  |   | 1 | 1 | 2.363   |
| cgd2_3980 | Myb domain containing protein                                                                           |   |  |   | 1 | 1 | 4.911   |
| cgd2_4010 | MAL7P1.13-like                                                                                          |   |  |   | 1 | 1 | 4.138   |
| cgd2_4020 | signal peptide                                                                                          |   |  |   |   | 1 | 17.160  |
| cgd2_4100 | hypothetical protein                                                                                    |   |  |   |   | 1 | 392.489 |
| cgd2_4110 | possible UBC domain containing protein                                                                  | 1 |  |   |   | 1 | 0.340   |
| cgd2_4160 | hypothetical protein having possible hemolytic activity                                                 |   |  |   |   | 1 | 25.970  |
| cgd2_4180 | hypothetical protein                                                                                    |   |  |   | 1 | 1 | 3.574   |
| cgd2_4200 | hypothetical protein                                                                                    |   |  | 1 |   | 1 | 2.204   |
| cgd2_4210 | uncharacterized protein with several coiled coil regions                                                | 1 |  |   |   | 1 | 0.579   |
| cgd2_4220 | hypothetical protein                                                                                    |   |  | 1 |   | 1 | 2.245   |
| cgd2_4250 | SPAC1486.03c-like tuftelin-interacting protein, G-patch domain                                          | 1 |  |   |   | 1 | 0.474   |
| cgd2_4290 | hypothetical protein                                                                                    |   |  |   |   | 1 | 8.404   |
| cgd2_4310 | hypothetical protein                                                                                    |   |  |   |   | 1 | 342.642 |
| cgd2_4360 | hypothetical protein                                                                                    |   |  |   |   | 1 | 35.148  |
| cgd2_4370 | signal peptide                                                                                          |   |  |   |   | 1 | 37.937  |
| cgd2_4380 | signal peptide, repeats, gene anchored to telomere                                                      |   |  |   |   | 1 | 7.503   |
| cgd2_470  | very low complexity large protein, possible unreal ORF?                                                 |   |  |   |   | 1 | 19.177  |
| cgd2_480  | hypothetical protein                                                                                    |   |  |   |   | 1 | 6.723   |
| cgd2_490  | hypothetical protein with signal peptide                                                                |   |  |   |   | 1 | 14.691  |
| cgd2_500  | hypothetical protein                                                                                    | 1 |  |   |   | 1 | 0.365   |
| cgd2_530  | possible proteasome component                                                                           | 1 |  |   |   | 1 | 0.413   |
| cgd2_560  | large low complexity protein                                                                            | 1 |  |   |   | 1 | 0.434   |
| cgd2_60   | hypothetical protein                                                                                    |   |  |   | 1 | 1 | 4.221   |
| cgd2_680  | hypothetical protein                                                                                    | 1 |  |   |   | 1 | 0.347   |
| cgd2_690  | large low complexity protein with glycine-rich repeats                                                  |   |  |   | 1 | 1 | 5.312   |
| cgd2_720  | hypothetical protein                                                                                    |   |  |   |   | 1 | 5.633   |
| cgd2_750  | bub3'bub3-like protein with WD40 repeats'                                                               | 1 |  |   |   | 1 | 0.486   |
| cgd2_770  | hypothetical protein                                                                                    |   |  |   |   | 1 | 25.904  |
| cgd2_780  | hypothetical protein                                                                                    |   |  |   |   | 1 | 17.990  |
| cgd2_850  | hypothetical protein, signal peptide                                                                    |   |  |   | 1 | 1 | 2.326   |
| cgd2_870  | drosophila CG6013 like HMG domain containing protein with a coiled coil region at the N-terminus        |   |  |   |   | 1 | 12.682  |
| cgd2_910  | hypothetical protein                                                                                    | 1 |  |   |   | 1 | 0.477   |
| cgd2_950  | hypothetical protein                                                                                    | 1 |  |   |   | 1 | 0.408   |
| cgd2_970  | hypothetical protein                                                                                    |   |  |   | 1 | 1 | 1.472   |
| cgd3_100  | hypothetical protein with signal peptide                                                                | 1 |  |   |   | 1 | 0.363   |
| cgd3_1020 | hypothetical protein                                                                                    |   |  |   |   | 1 | 9.711   |
| cgd3_1030 | uncharacterized low complexity protein                                                                  | 1 |  |   |   | 1 | 0.456   |
| cgd3_1040 | hypothetical protein                                                                                    | 1 |  |   |   | 1 | 0.282   |
| cgd3_1050 | hypothetical protein                                                                                    | 1 |  |   |   | 1 | 0.439   |
| cgd3_1080 | hypothetical protein                                                                                    | 1 |  |   |   | 1 | 0.272   |
| cgd3_1100 | hypothetical protein                                                                                    | 1 |  |   |   | 1 | 0.381   |
| cgd3_1130 | hypothetical protein                                                                                    | 1 |  |   |   | 1 | 0.304   |
| cgd3_120  | hypothetical protein                                                                                    | 1 |  |   |   | 1 | 0.431   |
| cgd3_1200 | possible prefoldin-related protein                                                                      |   |  |   |   | 1 | 6.512   |
| cgd3_1210 | hypothetical protein having a signal peptide, conserved region, and three or more transmembrane domains | 1 |  |   |   | 1 | 0.459   |
| cgd3_1220 | hypothetical protein                                                                                    |   |  |   |   | 1 | 51.370  |
| cgd3_1240 | hypothetical protein                                                                                    | 1 |  |   |   | 1 | 0.448   |
| cgd3_1260 | ring domain protein                                                                                     |   |  |   | 1 | 1 | 5.428   |
| cgd3_1280 | hypothetical protein                                                                                    | 1 |  |   |   | 1 | 0.531   |

|           |                                                                                                                |   |   |   |   |   |           |
|-----------|----------------------------------------------------------------------------------------------------------------|---|---|---|---|---|-----------|
| cgd3_130  | DRG like OBG family GTPase fused to an RNA binding domain<br>TGS domain, Fun11p                                | 1 |   |   |   | 1 | 0.379     |
| cgd3_1310 | hypothetical protein                                                                                           | 1 |   |   |   | 1 | 0.432     |
| cgd3_1330 | hypothetical protein having a signal peptide                                                                   |   | 1 |   |   | 1 | 1.879     |
| cgd3_1390 | hypothetical protein                                                                                           |   | 1 |   |   | 1 | 1.659     |
| cgd3_1410 | small hypothetical protein                                                                                     |   |   |   | 1 | 1 | 44.129    |
| cgd3_1460 | GAF domain containing protein                                                                                  | 1 |   |   |   | 1 | 0.455     |
| cgd3_1490 | hypothetical protein                                                                                           | 1 |   |   |   | 1 | 0.363     |
| cgd3_150  | hypothetical protein                                                                                           | 1 |   |   |   | 1 | 0.564     |
| cgd3_1500 | hypothetical protein                                                                                           |   |   |   | 1 | 1 | 13.340    |
| cgd3_1530 | hypothetical protein                                                                                           |   |   |   | 1 | 1 | 16.831    |
| cgd3_1540 | large protein with signal peptide. cysteine-rich, threonine-rich,<br>possible mucin                            | 1 |   |   |   | 1 | 0.475     |
| cgd3_1550 | Sec14 domain containing protein                                                                                |   |   | 1 |   | 1 | 5.563     |
| cgd3_1570 | sporozoite antigen, putative                                                                                   |   |   |   | 1 | 1 | 1,957.286 |
| cgd3_160  | hypothetical protein                                                                                           |   |   |   | 1 | 1 | 36.880    |
| cgd3_1630 | hypothetical protein                                                                                           |   |   |   | 1 | 1 | 5.622     |
| cgd3_170  | hypothetical protein                                                                                           |   |   |   | 1 | 1 | 8.071     |
| cgd3_1830 | hypothetical protein having a signal peptide                                                                   | 1 |   |   |   | 1 | 0.476     |
| cgd3_1840 | large uncharacterized protein                                                                                  | 1 |   |   |   | 1 | 0.438     |
| cgd3_1880 | protein with 2x rrm domains                                                                                    |   | 1 |   |   | 1 | 2.163     |
| cgd3_190  | latent transforming growth factor beta binding protein like<br>(3F865)                                         |   |   | 1 |   | 1 | 4.444     |
| cgd3_1910 | hypothetical protein                                                                                           | 1 |   |   |   | 1 | 0.421     |
| cgd3_1970 | hypothetical protein                                                                                           | 1 |   |   |   | 1 | 0.495     |
| cgd3_1980 | hypothetical protein                                                                                           |   |   |   | 1 | 1 | 10.129    |
| cgd3_1990 | hypothetical protein                                                                                           | 1 |   |   |   | 1 | 0.456     |
| cgd3_20   | hypothetical protein containing a signal peptide                                                               | 1 |   |   |   | 1 | 0.395     |
| cgd3_2000 | WD repeat protein                                                                                              | 1 |   |   |   | 1 | 0.419     |
| cgd3_2010 | hypothetical protein                                                                                           | 1 |   |   |   | 1 | 0.380     |
| cgd3_2060 | ring domain protein                                                                                            |   | 1 |   |   | 1 | 1.443     |
| cgd3_2070 | hypothetical protein                                                                                           |   |   |   | 1 | 1 | 30.385    |
| cgd3_210  | hypothetical protein                                                                                           | 1 |   |   |   | 1 | 0.518     |
| cgd3_2130 | hypothetical protein with signal peptide                                                                       |   | 1 |   |   | 1 | 1.219     |
| cgd3_2140 | hypothetical protein                                                                                           |   | 1 |   |   | 1 | 1.720     |
| cgd3_220  | hypothetical protein                                                                                           | 1 | 1 |   |   | 2 | 1.201     |
| cgd3_2230 | hypothetical protein                                                                                           |   |   |   | 1 | 1 | 10.783    |
| cgd3_2260 | hypothetical protein                                                                                           |   |   |   |   | 1 | 28.261    |
| cgd3_2270 | WD repeat protein                                                                                              |   |   | 1 |   | 1 | 3.945     |
| cgd3_2310 | hypothetical protein                                                                                           |   | 1 |   |   | 1 | 5.446     |
| cgd3_2330 | hypothetical protein                                                                                           |   |   |   |   | 1 | 238.164   |
| cgd3_2340 | hypothetical protein                                                                                           |   |   |   | 1 | 1 | 14.584    |
| cgd3_2380 | hypothetical protein                                                                                           | 1 |   |   |   | 1 | 0.595     |
| cgd3_240  | hypothetical protein                                                                                           | 1 |   |   |   | 1 | 0.456     |
| cgd3_2400 | Yn1201cp-family protein                                                                                        |   | 1 |   |   | 1 | 2.078     |
| cgd3_2470 | hypothetical protein                                                                                           |   |   |   |   | 1 | 236.906   |
| cgd3_2480 | hypothetical protein                                                                                           | 1 |   |   |   | 1 | 0.487     |
| cgd3_2490 | hypothetical protein                                                                                           | 1 |   |   |   | 1 | 0.403     |
| cgd3_2510 | myb domain-containing protein                                                                                  |   | 1 |   |   | 1 | 1.971     |
| cgd3_2550 | hypothetical protein with carboxy terminus motif shared with<br>DNA-directed RNA polymerase subunit and TFIIIS |   |   |   | 1 | 1 | 11.483    |
| cgd3_260  | hypothetical protein                                                                                           | 1 |   |   |   | 1 | 0.430     |
| cgd3_2640 | hypothetical protein with conserved domain                                                                     |   |   |   |   | 1 | 35.087    |
| cgd3_2660 | hypothetical protein                                                                                           |   |   |   | 1 | 1 | 11.451    |
| cgd3_2700 | Trafficking protein particle complex subunit 6B, putative                                                      | 1 |   |   |   | 1 | 0.326     |
| cgd3_2750 | hypothetical protein                                                                                           |   | 1 |   |   | 1 | 4.007     |
| cgd3_2800 | hypothetical protein                                                                                           |   |   |   | 1 | 1 | 12.280    |
| cgd3_2830 | hypothetical protein                                                                                           |   |   |   | 1 | 1 | 8.344     |
| cgd3_2860 | hypothetical protein                                                                                           | 1 |   |   |   | 1 | 0.478     |
| cgd3_2890 | Prp8. JAB/PAD domain                                                                                           |   |   | 1 |   | 1 | 3.159     |
| cgd3_3000 | TBC domain containing protein                                                                                  |   |   | 1 |   | 1 | 4.058     |
| cgd3_3010 | hypothetical protein                                                                                           |   | 1 |   |   | 1 | 5.372     |
| cgd3_3050 | hypothetical protein                                                                                           | 1 |   |   |   | 1 | 0.422     |
| cgd3_3070 | WD-40 repeat protein, SMART LisH domain                                                                        | 1 |   |   |   | 1 | 0.362     |
| cgd3_3080 | hypothetical protein                                                                                           |   |   |   | 1 | 1 | 8.899     |
| cgd3_3130 | hypothetical protein                                                                                           | 1 |   |   |   | 1 | 0.418     |
| cgd3_3140 | hypothetical protein                                                                                           | 1 |   |   |   | 1 | 0.449     |
| cgd3_3200 | hypothetical protein                                                                                           |   |   | 1 |   | 1 | 2.487     |
| cgd3_3210 | PV1H14080_P                                                                                                    | 1 |   |   |   | 1 | 0.416     |
| cgd3_3240 | hypothetical protein                                                                                           | 1 |   |   |   | 1 | 0.464     |
| cgd3_3260 | hypothetical protein                                                                                           |   |   | 1 |   | 1 | 4.404     |
| cgd3_3290 | hypothetical protein with possible signal peptide and one<br>transmembrane region                              | 1 |   |   |   | 1 | 0.389     |
| cgd3_3330 | hypothetical protein                                                                                           | 1 |   |   |   | 1 | 0.570     |
| cgd3_3350 | hypothetical protein                                                                                           |   |   |   | 1 | 1 | 12.080    |
| cgd3_3370 | large hypothetical protein with signal peptide                                                                 |   |   |   | 1 | 1 | 18.710    |
| cgd3_3400 | hypothetical protein                                                                                           | 1 |   |   |   | 1 | 0.386     |

|           |                                                                                                                 |   |   |   |   |   |         |
|-----------|-----------------------------------------------------------------------------------------------------------------|---|---|---|---|---|---------|
| cgd3_3410 | hypothetical protein                                                                                            | 1 |   |   |   | 1 | 0.301   |
| cgd3_3450 | hypothetical protein                                                                                            | 1 |   |   |   | 1 | 0.351   |
| cgd3_3460 | hypothetical protein with cysteine rich regions                                                                 |   | 1 |   |   | 1 | 1.620   |
| cgd3_3470 | proliferating cell nuclear antigen                                                                              | 1 |   |   |   | 1 | 0.416   |
| cgd3_3480 | large Sec7 domain containing protein                                                                            | 1 |   |   |   | 1 | 0.300   |
| cgd3_3510 | hypothetical protein                                                                                            |   |   | 1 |   | 1 | 2.332   |
| cgd3_3540 | hypothetical protein                                                                                            | 1 |   |   |   | 1 | 0.459   |
| cgd3_3580 | DRG-like OBG family GTPase fused to an RNA binding domain<br>TGS domain, Fun11p                                 |   |   |   | 1 | 1 | 16.266  |
| cgd3_360  | hypothetical protein                                                                                            |   |   |   | 1 | 1 | 7.058   |
| cgd3_3640 | hypothetical protein having a signal peptide                                                                    | 1 |   |   |   | 1 | 0.344   |
| cgd3_3680 | UIM domain and EF hand containing protein that also has a<br>conserved domain between                           |   |   |   | 1 | 1 | 10.058  |
| cgd3_3710 | hypothetical protein                                                                                            | 1 |   |   |   | 1 | 0.342   |
| cgd3_3760 | small protein with possible EF hand domains, calmodulin like                                                    | 1 | 1 |   |   | 2 | 0.866   |
| cgd3_3780 | hypothetical protein                                                                                            |   |   | 1 |   | 1 | 6.539   |
| cgd3_3830 | hypothetical protein                                                                                            |   |   |   | 1 | 1 | 22.761  |
| cgd3_3860 | coiled coil protein                                                                                             |   | 1 |   |   | 1 | 2.001   |
| cgd3_3900 | hypothetical protein                                                                                            |   |   | 1 |   | 1 | 2.564   |
| cgd3_3990 | hypothetical protein                                                                                            | 1 |   |   |   | 1 | 0.325   |
| cgd3_400  | hypothetical protein                                                                                            |   |   | 1 |   | 1 | 2.890   |
| cgd3_4000 | hypothetical protein                                                                                            | 1 |   | 1 |   | 2 | 1.539   |
| cgd3_4040 | hypothetical protein with signal peptide, proline rich                                                          |   |   | 1 |   | 1 | 3.122   |
| cgd3_4120 | hypothetical protein                                                                                            |   |   | 1 |   | 1 | 4.765   |
| cgd3_4130 | hypothetical protein                                                                                            | 1 |   |   |   | 1 | 0.382   |
| cgd3_420  | hypothetical protein                                                                                            | 1 |   |   |   | 1 | 0.363   |
| cgd3_4230 | hypothetical protein, signal peptide                                                                            | 1 |   |   |   | 1 | 0.498   |
| cgd3_480  | hypothetical protein with a signal peptide                                                                      |   |   |   | 1 | 1 | 18.854  |
| cgd3_530  | large hypothetical protein with signal peptide                                                                  |   |   | 1 |   | 1 | 3.456   |
| cgd3_60   | hypothetical protein                                                                                            | 1 |   |   |   | 1 | 0.386   |
| cgd3_630  | hypothetical protein with signal peptide                                                                        | 1 |   |   |   | 1 | 0.402   |
| cgd3_650  | hypothetical protein, signal peptide                                                                            |   |   | 1 |   | 1 | 4.158   |
| cgd3_660  | hypothetical protein, signal peptide                                                                            | 1 |   |   |   | 1 | 0.368   |
| cgd3_70   | hypothetical protein                                                                                            |   |   |   |   | 1 | 43.229  |
| cgd3_710  | large hypothetical protein with signal peptide                                                                  |   | 1 |   |   | 1 | 1.597   |
| cgd3_720  | very large probable mucin, 11700 aa long protein with signal<br>peptide and pronounced Thr repeat (308 aa long) | 1 |   |   |   | 1 | 0.349   |
| cgd3_750  | hypothetical protein                                                                                            |   |   |   |   | 1 | 256.523 |
| cgd3_780  | hypothetical protein                                                                                            |   |   |   | 1 | 1 | 6.367   |
| cgd3_790  | hypothetical protein                                                                                            | 1 |   |   |   | 1 | 0.317   |
| cgd3_820  | hypothetical protein                                                                                            | 1 |   |   |   | 1 | 0.672   |
| cgd3_840  | RSC6/BAF60A ortholog with a SWIB domain                                                                         |   |   |   | 1 | 1 | 10.051  |
| cgd3_850  | hypothetical protein                                                                                            |   |   | 1 |   | 1 | 4.512   |
| cgd3_870  | flavoprotein, putative                                                                                          | 1 |   |   |   | 1 | 0.453   |
| cgd3_880  | hypothetical protein                                                                                            |   |   |   |   | 1 | 214.247 |
| cgd3_90   | hypothetical protein with signal peptide                                                                        | 1 |   |   |   | 1 | 0.395   |
| cgd3_900  | hypothetical protein                                                                                            | 1 |   |   |   | 1 | 0.419   |
| cgd3_910  | hypothetical protein                                                                                            | 1 |   |   |   | 1 | 0.509   |
| cgd3_940  | hypothetical protein                                                                                            | 1 |   |   |   | 1 | 0.349   |
| cgd3_960  | hypothetical protein                                                                                            |   |   | 1 |   | 1 | 2.526   |
| cgd3_980  | hypothetical protein                                                                                            |   |   |   |   | 1 | 121.126 |
| cgd4_100  | hypothetical protein                                                                                            | 1 |   |   |   | 1 | 0.340   |
| cgd4_1000 | hypothetical protein                                                                                            | 1 |   |   |   | 1 | 0.349   |
| cgd4_1020 | hypothetical protein                                                                                            | 1 |   |   |   | 1 | 0.314   |
| cgd4_1070 | MYND finger domain protein                                                                                      |   |   |   |   | 1 | 21.170  |
| cgd4_110  | hypothetical protein                                                                                            |   | 1 |   |   | 1 | 1.489   |
| cgd4_1100 | hypothetical protein                                                                                            |   |   | 1 |   | 1 | 2.343   |
| cgd4_1180 | hypothetical protein                                                                                            | 1 |   |   |   | 1 | 0.301   |
| cgd4_120  | WD repeat protein                                                                                               | 1 |   |   |   | 1 | 0.320   |
| cgd4_1210 | Ms15p; KH + 2 Znknuckle (C2HC)                                                                                  |   |   | 1 |   | 1 | 5.235   |
| cgd4_1240 | hypothetical protein                                                                                            |   |   | 1 |   | 1 | 4.555   |
| cgd4_1250 | hypothetical protein                                                                                            | 1 |   |   |   | 1 | 0.244   |
| cgd4_1260 | possible tRNA-INTRON ENDONUCLEASE                                                                               | 1 |   |   |   | 1 | 0.393   |
| cgd4_130  | RRM domain and KH domain protein (SPAC30D11.14-like KH)                                                         | 1 |   |   |   | 1 | 0.390   |
| cgd4_1300 | uncharacterized secreted protein with thr rich regions, possible<br>mucin                                       | 1 |   |   |   | 1 | 0.415   |
| cgd4_1420 | hypothetical protein                                                                                            |   | 1 |   |   | 1 | 1.929   |
| cgd4_1430 | hypothetical protein                                                                                            | 1 |   |   |   | 1 | 0.402   |
| cgd4_1460 | hypothetical protein                                                                                            | 1 |   |   |   | 1 | 0.370   |
| cgd4_1500 | hypothetical protein                                                                                            |   | 1 |   |   | 1 | 1.399   |
| cgd4_1540 | hypothetical protein                                                                                            |   |   |   |   | 1 | 47.307  |
| cgd4_1560 | hypothetical protein                                                                                            |   |   |   |   | 1 | 36.056  |
| cgd4_1620 | hypothetical protein                                                                                            |   |   | 1 |   | 1 | 3.778   |
| cgd4_1630 | hypothetical protein                                                                                            | 1 |   |   |   | 1 | 0.424   |
| cgd4_1640 | hypothetical protein                                                                                            | 1 |   |   |   | 1 | 0.438   |
| cgd4_170  | hypothetical protein                                                                                            |   |   |   | 1 | 1 | 10.594  |
| cgd4_1710 | Low complexity protein                                                                                          |   |   | 1 |   | 1 | 3.354   |

|           |                                                                                                                  |   |  |   |   |   |         |
|-----------|------------------------------------------------------------------------------------------------------------------|---|--|---|---|---|---------|
| cgd4_1770 | hypothetical protein                                                                                             |   |  | 1 |   | 1 | 2.566   |
| cgd4_180  | hypothetical protein                                                                                             | 1 |  |   |   | 1 | 0.456   |
| cgd4_1810 | hypothetical protein                                                                                             | 1 |  |   |   | 1 | 0.410   |
| cgd4_1870 | hypothetical protein                                                                                             | 1 |  |   |   | 1 | 0.433   |
| cgd4_1880 | hypothetical protein                                                                                             | 1 |  |   |   | 1 | 0.488   |
| cgd4_1900 | hypothetical protein                                                                                             | 1 |  |   |   | 1 | 0.323   |
| cgd4_1930 | possible origin recognition complex protein subunit 2, orc2                                                      | 1 |  |   |   | 1 | 0.515   |
| cgd4_1980 | TBC domain containing protein                                                                                    |   |  | 1 |   | 1 | 1.656   |
| cgd4_1990 | RRp1-like protein                                                                                                |   |  |   |   | 1 | 40.954  |
| cgd4_200  | large low complexity coiled coil protien with large repeat region                                                |   |  |   |   | 1 | 24.512  |
| cgd4_2040 | SMART RPR domain at NH2 terminus, SMART AZnF_C2H2                                                                | 1 |  |   |   | 1 | 0.388   |
| cgd4_2120 | PX domain containing protein                                                                                     | 1 |  |   |   | 1 | 0.431   |
| cgd4_2130 | TBC domain containing protein                                                                                    |   |  |   | 1 | 1 | 13.805  |
| cgd4_2140 | hypothetical protein                                                                                             |   |  | 1 |   | 1 | 2.181   |
| cgd4_2150 | hypothetical protein                                                                                             |   |  |   |   | 1 | 28.948  |
| cgd4_2170 | hypothetical protein                                                                                             | 1 |  |   |   | 1 | 0.415   |
| cgd4_2200 | SMC2 protein                                                                                                     | 1 |  |   |   | 1 | 0.444   |
| cgd4_2220 | possible double-stranded DNA-binding domain, small conserved protein                                             | 1 |  |   |   | 1 | 0.425   |
| cgd4_2230 | uncharacterized protein                                                                                          | 1 |  |   |   | 1 | 0.481   |
| cgd4_2240 | hypothetical protein                                                                                             | 1 |  |   |   | 1 | 0.333   |
| cgd4_2280 | hypothetical protein                                                                                             |   |  |   | 1 | 1 | 23.834  |
| cgd4_2290 | hypothetical protein                                                                                             |   |  |   | 1 | 1 | 10.438  |
| cgd4_230  | hypothetical protein containing a signal peptide                                                                 | 1 |  |   |   | 1 | 0.378   |
| cgd4_2310 | hypothetical protein                                                                                             | 1 |  |   |   | 1 | 0.441   |
| cgd4_2320 | At3g18860/MCB22_3                                                                                                | 1 |  |   |   | 1 | 0.394   |
| cgd4_2350 | multitransmembrane protein with signal peptide and GMGPP repeat at C-terminus                                    | 1 |  |   |   | 1 | 0.492   |
| cgd4_2380 | possible SAND family protein                                                                                     | 1 |  |   |   | 1 | 0.457   |
| cgd4_2410 | hypothetical protein                                                                                             |   |  | 1 |   | 1 | 1.909   |
| cgd4_2440 | small hypothetical protein with signal peptide                                                                   |   |  |   | 1 | 1 | 8.578   |
| cgd4_2460 | hypothetical protein with a signal peptide, gene within locus of signal-peptide containing hypothetical proteins |   |  |   |   | 1 | 160.198 |
| cgd4_2470 | hypothetical protein with a signal peptide, gene within locus of signal-peptide containing hypothetical proteins |   |  | 1 |   | 1 | 2.909   |
| cgd4_2480 | hypothetical protein with a signal peptide, gene within locus of signal-peptide containing hypothetical proteins |   |  | 1 |   | 1 | 2.488   |
| cgd4_2510 | hypothetical protein with a signal peptide, gene within locus of signal-peptide containing hypothetical proteins |   |  | 1 |   | 1 | 1.984   |
| cgd4_2520 | hypothetical protein with a signal peptide, gene within locus of signal-peptide containing hypothetical proteins |   |  |   | 1 | 1 | 17.848  |
| cgd4_2570 | WD repeat protein                                                                                                |   |  | 1 |   | 1 | 3.278   |
| cgd4_260  | WD repeat protein                                                                                                |   |  |   | 1 | 1 | 10.152  |
| cgd4_2610 | hypothetical protein                                                                                             |   |  |   | 1 | 1 | 9.421   |
| cgd4_2620 | hypothetical protein                                                                                             |   |  | 1 |   | 1 | 1.455   |
| cgd4_2630 | hypothetical protein                                                                                             |   |  |   | 1 | 1 | 16.559  |
| cgd4_2640 | hypothetical protein                                                                                             |   |  |   | 1 | 1 | 18.862  |
| cgd4_2650 | hypothetical protein                                                                                             |   |  | 1 |   | 1 | 3.247   |
| cgd4_2660 | similarity at COOH terminus with programmed cell death protein 2                                                 |   |  | 1 |   | 1 | 1.650   |
| cgd4_2690 | sec7 domain containing protein, possibly of plant origin                                                         | 1 |  |   |   | 1 | 0.405   |
| cgd4_2730 | predicted coiled-coil protein                                                                                    | 1 |  |   |   | 1 | 0.518   |
| cgd4_2760 | hypothetical protein                                                                                             | 1 |  |   |   | 1 | 0.371   |
| cgd4_2800 | hypothetical protein having a signal peptide                                                                     |   |  | 1 |   | 1 | 1.356   |
| cgd4_2810 | hypothetical protein, signal peptide                                                                             | 1 |  |   |   | 1 | 0.327   |
| cgd4_2880 | hypothetical protein                                                                                             |   |  |   | 1 | 1 | 6.438   |
| cgd4_2920 | hypothetical protein                                                                                             | 1 |  |   |   | 1 | 0.401   |
| cgd4_2950 | hypothetical protein                                                                                             |   |  |   | 1 | 1 | 3.814   |
| cgd4_2980 | RhoGAP domain containing protein with a Sec14D domain at the N-terminus                                          |   |  |   |   | 1 | 33.744  |
| cgd4_30   | hypothetical protein                                                                                             |   |  | 1 |   | 1 | 1.625   |
| cgd4_3010 | hypothetical protein                                                                                             |   |  |   | 1 | 1 | 16.478  |
| cgd4_3020 | hypothetical protein with a signal peptide                                                                       |   |  | 1 |   | 1 | 3.341   |
| cgd4_3030 | hypothetical protein with a signal peptide                                                                       |   |  |   | 1 | 1 | 9.488   |
| cgd4_3050 | hypothetical protein                                                                                             |   |  |   |   | 1 | 232.621 |
| cgd4_3060 | hypothetical protein                                                                                             | 1 |  |   |   | 1 | 0.258   |
| cgd4_3070 | hypothetical protein                                                                                             |   |  | 1 |   | 1 | 2.330   |
| cgd4_31   | hypothetical protein                                                                                             | 1 |  |   |   | 1 | 0.498   |
| cgd4_3140 | WD repeat protein                                                                                                |   |  | 1 |   | 1 | 1.628   |
| cgd4_32   | hypothetical protein                                                                                             |   |  | 1 |   | 1 | 2.021   |
| cgd4_3200 | hypothetical protein                                                                                             |   |  |   | 1 | 1 | 16.066  |
| cgd4_3210 | hypothetical protein                                                                                             |   |  | 1 |   | 1 | 2.913   |
| cgd4_3230 | hypothetical protein with a signal peptide                                                                       |   |  |   | 1 | 1 | 27.260  |
| cgd4_3240 | possible NLI interacting factor CTD-like phosphatase                                                             | 1 |  |   |   | 1 | 0.363   |
| cgd4_3280 | hypothetical protein                                                                                             |   |  |   |   | 1 | 52.507  |
| cgd4_330  | hypothetical protein                                                                                             |   |  | 1 |   | 1 | 23.099  |
| cgd4_3330 | hypothetical protein                                                                                             |   |  |   |   | 1 | 64.007  |
| cgd4_3350 | hypothetical protein                                                                                             | 1 |  |   |   | 1 | 0.449   |

|           |                                                                                                                                   |   |  |   |   |   |         |
|-----------|-----------------------------------------------------------------------------------------------------------------------------------|---|--|---|---|---|---------|
| cgd4_3360 | WD repeat protein                                                                                                                 |   |  |   | 1 | 1 | 67.441  |
| cgd4_3370 | hypothetical protein                                                                                                              |   |  | 1 |   | 1 | 5.206   |
| cgd4_3390 | neutral sphingomyelinase activation associated factor-like BEACH domain containing protein                                        |   |  | 1 |   | 1 | 2.456   |
| cgd4_340  | protein with possible conserved beta tubulin folding factor domain                                                                | 1 |  |   |   | 1 | 0.397   |
| cgd4_3430 | hypothetical protein with signal peptide and central coiled-coil region, within large locus of signal peptide containing proteins |   |  |   | 1 | 1 | 13.655  |
| cgd4_3500 | hypothetical protein                                                                                                              | 1 |  |   |   | 1 | 0.290   |
| cgd4_3510 | hypothetical protein                                                                                                              | 1 |  |   |   | 1 | 0.390   |
| cgd4_3530 | large hypothetical protein with signal peptide, within large locus of signal peptide containing proteins                          |   |  | 1 |   | 1 | 1.767   |
| cgd4_3560 | hypothetical protein                                                                                                              |   |  |   |   | 1 | 30.768  |
| cgd4_3600 | hypothetical protein with possible signal peptide, 'HCD family'paralog                                                            |   |  |   |   | 1 | 42.823  |
| cgd4_3610 | hypothetical protein with signal peptide                                                                                          |   |  |   | 1 | 1 | 10.442  |
| cgd4_3620 | immunodominant antigen 23393226                                                                                                   |   |  |   |   | 1 | 787.563 |
| cgd4_3640 | hypothetical protein                                                                                                              |   |  |   |   | 1 | 112.981 |
| cgd4_3660 | hypothetical protein                                                                                                              | 1 |  |   |   | 1 | 0.372   |
| cgd4_3670 | uncharacterized low complexity protein                                                                                            |   |  |   | 1 | 1 | 9.023   |
| cgd4_3680 | hypothetical protein                                                                                                              |   |  |   | 1 | 1 | 11.611  |
| cgd4_3690 | large glycine-rich repeat low complexity protein                                                                                  |   |  |   |   | 1 | 28.345  |
| cgd4_3720 | possible 2 TPR domains at N-terminus                                                                                              | 1 |  |   |   | 1 | 0.472   |
| cgd4_3730 | hypothetical protein                                                                                                              |   |  |   | 1 | 1 | 1.856   |
| cgd4_3750 | hypothetical protein with signal peptide                                                                                          |   |  |   |   | 1 | 6.132   |
| cgd4_3760 | hypothetical protein                                                                                                              |   |  |   | 1 | 1 | 1.417   |
| cgd4_3780 | hypothetical protein                                                                                                              | 1 |  |   | 1 | 2 | 3.769   |
| cgd4_3820 | hypothetical protein                                                                                                              | 1 |  |   |   | 1 | 0.422   |
| cgd4_3830 | Ank repeat protein with possible signal peptide                                                                                   | 1 |  |   |   | 1 | 0.382   |
| cgd4_3840 | Ank, ankyrin repeats containing protein with 9 transmembrane domains at C-terminus                                                | 1 |  |   |   | 1 | 0.338   |
| cgd4_3870 | large protein with signal peptide                                                                                                 | 1 |  |   |   | 1 | 0.419   |
| cgd4_3890 | hypothetical protein                                                                                                              | 1 |  |   |   | 1 | 0.299   |
| cgd4_3900 | hypothetical protein                                                                                                              | 1 |  |   |   | 1 | 0.309   |
| cgd4_3910 | hypothetical protein                                                                                                              |   |  |   |   | 1 | 44.273  |
| cgd4_3960 | hypothetical protein                                                                                                              | 1 |  |   |   | 1 | 0.426   |
| cgd4_3980 | hypothetical protein                                                                                                              |   |  |   |   | 1 | 2.863   |
| cgd4_400  | protein with possible 2 TPR domains                                                                                               | 1 |  |   | 1 | 1 | 0.395   |
| cgd4_4000 | possible ribosomal-protein-alanine acetyltransferase                                                                              | 1 |  |   |   | 1 | 0.448   |
| cgd4_4030 | hypothetical protein                                                                                                              |   |  |   | 1 | 1 | 2.267   |
| cgd4_4060 | B-box zinc finger domain containing protein                                                                                       | 1 |  |   |   | 1 | 0.560   |
| cgd4_4070 | hypothetical protein                                                                                                              | 1 |  |   |   | 1 | 0.367   |
| cgd4_410  | protein with 4xEZ_heat domains                                                                                                    |   |  |   |   | 1 | 51.034  |
| cgd4_4100 | hypothetical protein                                                                                                              | 1 |  |   |   | 1 | 0.309   |
| cgd4_4130 | hypothetical protein                                                                                                              | 1 |  |   |   | 1 | 0.331   |
| cgd4_4150 | hypothetical protein                                                                                                              | 1 |  |   |   | 1 | 0.327   |
| cgd4_4170 | hypothetical protein                                                                                                              | 1 |  |   |   | 1 | 0.432   |
| cgd4_4180 | hypothetical protein                                                                                                              | 1 |  |   |   | 1 | 0.297   |
| cgd4_4190 | hypothetical protein with signal peptide                                                                                          | 1 |  |   |   | 1 | 0.389   |
| cgd4_4220 | hypothetical protein                                                                                                              | 1 |  |   |   | 1 | 0.279   |
| cgd4_4250 | hypothetical protein                                                                                                              |   |  |   | 1 | 1 | 1.650   |
| cgd4_4270 | hypothetical protein                                                                                                              |   |  |   | 1 | 1 | 2.633   |
| cgd4_4310 | ring finger domain containing protein                                                                                             |   |  |   |   | 1 | 481.612 |
| cgd4_4330 | hypothetical protein                                                                                                              |   |  |   | 1 | 1 | 1.509   |
| cgd4_4350 | hypothetical protein                                                                                                              | 1 |  | 1 |   | 2 | 1.009   |
| cgd4_4360 | ring finger domain containing protein                                                                                             | 1 |  |   |   | 1 | 0.313   |
| cgd4_4370 | hypothetical protein                                                                                                              | 1 |  |   |   | 1 | 0.287   |
| cgd4_4380 | hypothetical protein, signal peptide                                                                                              | 1 |  |   |   | 1 | 0.305   |
| cgd4_4400 | hypothetical protein                                                                                                              |   |  |   |   | 1 | 73.638  |
| cgd4_4410 | 2x PHD domain containing protein                                                                                                  |   |  |   | 1 | 1 | 2.093   |
| cgd4_4420 | hypothetical protein                                                                                                              |   |  |   |   | 1 | 5.465   |
| cgd4_4440 | hypothetical protein                                                                                                              |   |  |   | 1 | 1 | 2.500   |
| cgd4_4450 | possible transporter with 11 transmembrane domains                                                                                | 1 |  |   |   | 1 | 0.337   |
| cgd4_450  | very large low complexity protein                                                                                                 | 1 |  |   |   | 1 | 0.494   |
| cgd4_4500 | signal peptide containing cysteine rich protein, gene anchored to telomere.                                                       |   |  |   |   | 1 | 15.850  |
| cgd4_460  | hypothetical protein                                                                                                              |   |  |   | 1 | 1 | 2.496   |
| cgd4_480  | hypothetical protein                                                                                                              | 1 |  |   |   | 1 | 0.473   |
| cgd4_490  | hypothetical protein                                                                                                              |   |  |   |   | 1 | 20.780  |
| cgd4_50   | hypothetical protein                                                                                                              | 1 |  |   |   | 1 | 0.453   |
| cgd4_510  | hypothetical protein                                                                                                              |   |  |   |   | 1 | 1.599   |
| cgd4_520  | hypothetical protein                                                                                                              | 1 |  |   |   | 1 | 0.497   |
| cgd4_550  | hypothetical protein                                                                                                              | 1 |  |   |   | 1 | 0.343   |
| cgd4_560  | hypothetical protein                                                                                                              | 1 |  |   |   | 1 | 0.397   |
| cgd4_600  | hypothetical protein                                                                                                              | 1 |  |   |   | 1 | 0.525   |
| cgd4_610  | MJ050-like PP-loop ATPase                                                                                                         | 1 |  |   |   | 1 | 0.379   |
| cgd4_680  | hypothetical protein                                                                                                              |   |  |   | 1 | 1 | 1.222   |
| cgd4_730  | hypothetical protein                                                                                                              | 1 |  |   |   | 1 | 0.367   |

|           |                                                                                                                |   |   |   |   |   |         |
|-----------|----------------------------------------------------------------------------------------------------------------|---|---|---|---|---|---------|
| cgd4_760  | possible ASF1 anti-silencing function 1 like protein                                                           | 1 |   |   |   | 1 | 0.446   |
| cgd4_770  | Low complexity protein with large Glu repeat                                                                   | 1 |   |   |   | 1 | 0.294   |
| cgd4_820  | WD repeat protein                                                                                              | 1 |   |   |   | 1 | 0.470   |
| cgd4_850  | large protein with signal peptide                                                                              | 1 |   |   |   | 1 | 0.441   |
| cgd4_860  | possible WWE domain                                                                                            |   |   |   | 1 | 1 | 10.894  |
| cgd4_90   | hypothetical protein                                                                                           |   |   |   | 1 | 1 | 38.676  |
| cgd4_900  | WD repeat containing protein                                                                                   |   |   |   | 1 | 1 | 9.413   |
| cgd4_940  | hypothetical protein                                                                                           |   |   |   | 1 | 1 | 12.471  |
| cgd4_950  | WD repeat protein                                                                                              | 1 |   |   |   | 1 | 0.342   |
| cgd5_10   | signal peptide containing protein                                                                              |   |   |   |   | 1 | 596.842 |
| cgd5_1010 | hypothetical protein                                                                                           |   |   | 1 |   | 1 | 4.613   |
| cgd5_1040 | arfgap'arfgap like finger domain containing protein'                                                           | 1 |   |   |   | 1 | 0.611   |
| cgd5_1050 | hypothetical protein                                                                                           | 1 |   |   |   | 1 | 0.372   |
| cgd5_1060 | hypothetical protein                                                                                           | 1 | 1 |   |   | 2 | 0.957   |
| cgd5_1080 | hypothetical protein                                                                                           |   |   |   | 1 | 1 | 7.228   |
| cgd5_1110 | C2H2 finger domain containing protein                                                                          | 1 |   |   |   | 1 | 0.490   |
| cgd5_1120 | DNMAP1 like Myb domain                                                                                         | 1 |   |   |   | 1 | 0.566   |
| cgd5_1130 | WD-40 repeat protein family / small nuclear ribonucleoprotein Prp4p-related                                    | 1 |   |   |   | 1 | 0.428   |
| cgd5_1150 | iwspip-like protein                                                                                            |   |   | 1 |   | 1 | 2.024   |
| cgd5_1160 | POZ domain protein that is fused to a MATH domain at its N-terminus                                            | 1 |   |   |   | 1 | 0.403   |
| cgd5_1200 | ring finger and bbox containing protein, putative                                                              |   |   |   |   | 1 | 23.380  |
| cgd5_1220 | hypothetical protein                                                                                           | 1 | 1 |   |   | 2 | 0.881   |
| cgd5_1230 | hypothetical protein                                                                                           |   | 1 |   |   | 1 | 1.296   |
| cgd5_1370 | hypothetical protein                                                                                           |   |   | 1 |   | 1 | 5.073   |
| cgd5_140  | ARF GTPase activating protein, putative                                                                        | 1 |   |   |   | 1 | 0.574   |
| cgd5_1400 | hypothetical protein                                                                                           | 1 |   |   |   | 1 | 0.378   |
| cgd5_1420 | putative secreted protein                                                                                      |   |   | 1 |   | 1 | 1.446   |
| cgd5_1440 | large protein with signal peptide                                                                              | 1 |   |   |   | 1 | 0.443   |
| cgd5_1450 | hypothetical protein with signal peptide                                                                       |   |   |   | 1 | 1 | 3.570   |
| cgd5_1460 | hypothetical protein with signal peptide                                                                       |   |   | 1 |   | 1 | 1.719   |
| cgd5_1480 | cysteine rich protein having a signal peptide                                                                  |   |   |   | 1 | 1 | 2.252   |
| cgd5_1500 | hypothetical protein                                                                                           | 1 |   |   |   | 1 | 0.466   |
| cgd5_1530 | hypothetical protein having a signal peptide                                                                   | 1 |   |   |   | 1 | 0.563   |
| cgd5_1580 | hypothetical protein                                                                                           |   |   |   |   | 1 | 177.577 |
| cgd5_1590 | hypothetical protein                                                                                           |   |   | 1 |   | 1 | 1.878   |
| cgd5_160  | hypothetical protein                                                                                           |   |   |   |   | 1 | 28.240  |
| cgd5_1610 | hypothetical protein, possibly apicomplexan conserved                                                          |   |   | 1 |   | 1 | 4.965   |
| cgd5_1620 | hypothetical protein with short conserved N-terminal motif, possible cysteine binding domain                   |   |   |   | 1 | 1 | 22.852  |
| cgd5_1640 | MORN repeat protein                                                                                            |   |   |   | 1 | 1 | 3.186   |
| cgd5_1650 | hypothetical protein                                                                                           |   |   |   | 1 | 1 | 4.511   |
| cgd5_1660 | hypothetical protein with signal peptide and acidic stretch                                                    |   |   | 1 |   | 1 | 1.767   |
| cgd5_1670 | hypothetical protein with conserved apicomplexan domain                                                        |   |   |   | 1 | 1 | 2.710   |
| cgd5_1680 | protein with an N-terminal domain shared with the TOG/ALP4p like microtubule associated proteins               | 1 |   |   |   | 1 | 0.568   |
| cgd5_170  | hypothetical protein                                                                                           |   |   |   | 1 | 1 | 3.481   |
| cgd5_1780 | MJ1625/yease Yp1009cp-like HhH domain                                                                          |   |   |   |   | 1 | 85.961  |
| cgd5_180  | hypothetical protein with signal peptide                                                                       |   |   |   | 1 | 1 | 7.055   |
| cgd5_1800 | hypothetical protein                                                                                           | 1 |   |   |   | 1 | 0.512   |
| cgd5_1810 | SMART 2xt_SNARE domain containing protein                                                                      | 1 |   |   |   | 1 | 0.543   |
| cgd5_1840 | Vir superfamily protein                                                                                        |   |   |   |   | 1 | 30.925  |
| cgd5_1870 | LETM1/MRS7 family protein with a transmembrane region at the N-terminus                                        | 1 |   |   |   | 1 | 0.275   |
| cgd5_1890 | hypothetical protein                                                                                           |   |   |   | 1 | 1 | 5.989   |
| cgd5_1930 | hypothetical protein                                                                                           | 1 |   |   |   | 1 | 0.479   |
| cgd5_1970 | AtPH1 like protein with a pleckstrin homology (PH) domain                                                      |   |   |   | 1 | 1 | 3.580   |
| cgd5_1980 | hypothetical protein                                                                                           |   |   |   | 1 | 1 | 6.009   |
| cgd5_1990 | hypothetical protein                                                                                           |   |   |   | 1 | 1 | 2.889   |
| cgd5_20   | signal peptide containing protein                                                                              |   |   |   | 1 | 1 | 2.466   |
| cgd5_200  | hypothetical protein                                                                                           | 1 |   |   |   | 1 | 0.312   |
| cgd5_2000 | protein with RIO domain within N-terminal region                                                               |   |   |   |   | 1 | 46.919  |
| cgd5_2050 | protein with forkhead associated (FHA) domain within N-terminal region and possible central coiled coil domain | 1 | 1 |   |   | 2 | 1.409   |
| cgd5_2080 | protein with PHD finger and a nipped-B/Mis4/Scc2 like domain at the C-terminus                                 |   |   | 1 |   | 1 | 1.904   |
| cgd5_2090 | FCH domain containing protein                                                                                  | 1 |   |   |   | 1 | 0.335   |
| cgd5_210  | hypothetical protein                                                                                           | 1 |   |   |   | 1 | 0.355   |
| cgd5_2120 | hypothetical protein                                                                                           |   |   | 1 |   | 1 | 1.611   |
| cgd5_2140 | hypothetical protein                                                                                           |   |   |   |   | 1 | 61.975  |
| cgd5_2170 | hypothetical protein                                                                                           |   |   |   | 1 | 1 | 2.401   |
| cgd5_2180 | large low complexity protein with proline/alanine-rich repeat                                                  |   |   |   |   | 1 | 61.504  |
| cgd5_220  | hypothetical protein                                                                                           | 1 |   |   |   | 1 | 0.347   |
| cgd5_2200 | T8M16_190-plant like protein with RRM domain                                                                   |   |   |   |   | 1 | 8.952   |
| cgd5_2250 | hypothetical protein                                                                                           |   |   |   | 1 | 1 | 5.962   |
| cgd5_2260 | Low complexity hypothetical protein                                                                            |   |   |   | 1 | 1 | 5.479   |
| cgd5_2310 | Sin3 like paired amphipathic helix containing protein                                                          |   |   |   |   | 1 | 24.474  |

|           |                                                                                                |   |   |   |   |   |         |
|-----------|------------------------------------------------------------------------------------------------|---|---|---|---|---|---------|
| cgd5_2340 | possible SET domain containing protein                                                         |   |   | 1 |   | 1 | 5.046   |
| cgd5_240  | G patch domain containing protein                                                              |   |   | 1 |   | 1 | 3.844   |
| cgd5_2540 | WD repeat protein                                                                              |   | 1 |   |   | 1 | 1.486   |
| cgd5_2560 | MutL family ATPase                                                                             | 1 |   |   |   | 1 | 0.369   |
| cgd5_2570 | hypothetical protein                                                                           |   |   | 1 |   | 1 | 5.281   |
| cgd5_260  | hypothetical protein                                                                           | 1 |   |   |   | 1 | 0.451   |
| cgd5_2600 | putative leucine aminopeptidase; of possible plant or bacterial origin                         |   | 1 |   |   | 1 | 1.390   |
| cgd5_2620 | penguin protein containing pumilio repeats                                                     |   |   |   | 1 | 1 | 19.644  |
| cgd5_2640 | little finger (CxxC...CxxC) domain containing protein                                          |   | 1 |   |   | 1 | 1.827   |
| cgd5_2650 | hypothetical protein                                                                           | 1 |   |   |   | 1 | 0.423   |
| cgd5_2660 | hypothetical protein                                                                           | 1 |   |   |   | 1 | 0.408   |
| cgd5_2700 | hypothetical protein with a signal peptide                                                     |   |   |   | 1 | 1 | 19.761  |
| cgd5_2720 | large protein containing a signal peptide                                                      |   |   |   | 1 | 1 | 266.329 |
| cgd5_2730 | hypothetical protein                                                                           |   |   | 1 |   | 1 | 4.324   |
| cgd5_2750 | hypothetical protein, signal peptide                                                           |   |   | 1 |   | 1 | 2.431   |
| cgd5_2760 | hypothetical protein                                                                           |   |   |   | 1 | 1 | 62.000  |
| cgd5_2770 | ARF like small GTPase                                                                          | 1 |   |   |   | 1 | 0.381   |
| cgd5_2850 | hypothetical protein                                                                           | 1 |   |   |   | 1 | 0.358   |
| cgd5_2860 | hypothetical protein                                                                           |   |   | 1 |   | 1 | 5.630   |
| cgd5_2890 | hypothetical protein                                                                           |   | 1 |   |   | 1 | 2.025   |
| cgd5_2920 | hypothetical protein                                                                           | 1 |   |   |   | 1 | 0.522   |
| cgd5_2930 | hypothetical protein                                                                           |   |   |   | 1 | 1 | 41.689  |
| cgd5_2970 | hypothetical protein                                                                           |   |   | 1 |   | 1 | 4.980   |
| cgd5_2980 | hypothetical protein                                                                           |   |   |   | 1 | 1 | 15.738  |
| cgd5_30   | hypothetical protein                                                                           |   |   |   | 1 | 1 | 161.352 |
| cgd5_300  | hypothetical protein                                                                           | 1 |   |   |   | 1 | 0.444   |
| cgd5_3010 | hypothetical protein with possible plus3 domain                                                |   | 1 |   |   | 1 | 2.234   |
| cgd5_3020 | hypothetical protein                                                                           | 1 |   |   |   | 1 | 0.389   |
| cgd5_3060 | hypothetical protein                                                                           | 1 |   |   |   | 1 | 0.354   |
| cgd5_3100 | hypothetical protein                                                                           | 1 |   |   |   | 1 | 0.440   |
| cgd5_3120 | hypothetical protein                                                                           |   | 1 |   |   | 1 | 1.506   |
| cgd5_3190 | hypothetical protein                                                                           | 1 |   |   |   | 1 | 0.307   |
| cgd5_3210 | large hypothetical protein with signal peptide                                                 | 1 |   |   |   | 1 | 0.356   |
| cgd5_330  | hypothetical protein                                                                           | 1 |   |   |   | 1 | 0.345   |
| cgd5_3300 | large protein with 4 PHD domains                                                               |   |   |   | 1 | 1 | 23.238  |
| cgd5_3310 | WD repeat protein                                                                              |   |   |   | 1 | 1 | 67.521  |
| cgd5_3320 | hypothetical protein                                                                           |   |   | 1 |   | 1 | 3.140   |
| cgd5_3350 | hypothetical protein                                                                           |   |   |   | 1 | 1 | 6.550   |
| cgd5_3370 | hypothetical protein                                                                           |   | 1 |   |   | 1 | 1.711   |
| cgd5_3380 | protein with signal peptide and possible kazal domain                                          | 1 | 1 |   |   | 2 | 1.160   |
| cgd5_3390 | very large hypothetical protein                                                                | 1 |   |   |   | 1 | 0.395   |
| cgd5_3440 | hypothetical protein                                                                           | 1 |   |   |   | 1 | 0.336   |
| cgd5_3470 | E. coli yfIP family protein                                                                    |   |   | 1 |   | 1 | 3.325   |
| cgd5_3480 | hypothetical protein with possible conserved HGG motif                                         |   |   |   | 1 | 1 | 105.595 |
| cgd5_3490 | hypothetical protein with signal peptide                                                       |   |   |   | 1 | 1 | 125.868 |
| cgd5_350  | hypothetical protein                                                                           |   |   | 1 |   | 1 | 2.522   |
| cgd5_3570 | putative secreted protein                                                                      | 1 |   |   |   | 1 | 0.366   |
| cgd5_3600 | predicted secreted protein                                                                     | 1 |   |   |   | 1 | 0.387   |
| cgd5_3620 | hypothetical protein                                                                           | 1 |   |   |   | 1 | 0.502   |
| cgd5_3640 | hypothetical protein                                                                           |   | 1 |   |   | 1 | 1.828   |
| cgd5_3650 | hypothetical protein                                                                           |   |   |   | 1 | 1 | 191.631 |
| cgd5_3670 | hypothetical protein                                                                           | 1 |   |   |   | 1 | 0.430   |
| cgd5_3680 | WD repeat containing protein                                                                   | 1 |   |   |   | 1 | 0.309   |
| cgd5_370  | predicted coiled coil protein                                                                  |   |   |   | 1 | 1 | 6.495   |
| cgd5_3700 | Sec1 family                                                                                    | 1 |   |   |   | 1 | 0.354   |
| cgd5_3760 | hypothetical protein                                                                           |   |   |   | 1 | 1 | 12.585  |
| cgd5_3780 | hypothetical protein with a possible cysteine-rich domain (BBOX zinc finger?)                  |   |   |   | 1 | 1 | 8.113   |
| cgd5_3800 | hypothetical protein                                                                           | 1 |   |   |   | 1 | 0.304   |
| cgd5_3830 | hypothetical protein                                                                           |   | 1 |   |   | 1 | 1.414   |
| cgd5_3860 | hypothetical protein                                                                           | 1 |   |   |   | 1 | 0.284   |
| cgd5_3880 | hypothetical protein                                                                           | 1 |   |   |   | 1 | 0.523   |
| cgd5_3900 | protein with RING finger domain at C-terminus                                                  | 1 |   |   |   | 1 | 0.253   |
| cgd5_3910 | hypothetical protein                                                                           | 1 |   |   |   | 1 | 0.346   |
| cgd5_3930 | hypothetical protein                                                                           |   | 1 |   |   | 1 | 1.954   |
| cgd5_40   | signal peptide containing large protein with proline stretches                                 |   |   |   | 1 | 1 | 100.741 |
| cgd5_400  | protein with 4 PHD domains plus a SET domain and associated cysteine cluster at the C-terminus | 1 |   |   |   | 1 | 0.309   |
| cgd5_4000 | hypothetical protein                                                                           | 1 |   |   |   | 1 | 0.290   |
| cgd5_4010 | hypothetical protein                                                                           | 1 |   |   |   | 1 | 0.399   |
| cgd5_4020 | hypothetical protein                                                                           | 1 |   |   |   | 1 | 0.427   |
| cgd5_4030 | hypothetical protein                                                                           | 1 |   |   |   | 1 | 0.316   |
| cgd5_4040 | hypothetical protein                                                                           | 1 |   |   |   | 1 | 0.370   |
| cgd5_4070 | hypothetical protein                                                                           | 1 |   |   |   | 1 | 0.400   |
| cgd5_4100 | hypothetical protein conserved in apicomplexa                                                  |   |   | 1 |   | 1 | 1.419   |
| cgd5_4110 | possible EF hand protein                                                                       |   |   | 1 |   | 1 | 1.692   |



|           |                                                                                             |   |   |   |   |   |         |
|-----------|---------------------------------------------------------------------------------------------|---|---|---|---|---|---------|
| cgd5_4120 | hypothetical protein with a signal peptide                                                  | 1 |   |   |   | 1 | 0.310   |
| cgd5_4130 | hypothetical protein having a signal peptide and transmembrane domain near C-terminus       | 1 |   |   |   | 1 | 0.420   |
| cgd5_4240 | hypothetical protein                                                                        | 1 |   |   |   | 1 | 0.417   |
| cgd5_4260 | WD40 repeat protein                                                                         |   |   |   | 1 | 1 | 41.796  |
| cgd5_4340 | hypothetical protein                                                                        | 1 |   |   |   | 1 | 0.614   |
| cgd5_4350 | hypothetical protein                                                                        |   |   |   | 1 | 1 | 25.399  |
| cgd5_4360 | large protein with possible RING domain                                                     |   |   | 1 |   | 1 | 3.380   |
| cgd5_440  | protein with 2 CAP (CARP) domains, possible adenylyl cyclase-associated protein             |   |   |   | 1 | 1 | 6.338   |
| cgd5_4400 | RIKEN cDNA 2610011N19 gen                                                                   |   | 1 |   |   | 1 | 1.970   |
| cgd5_4410 | hypothetical protein                                                                        |   |   |   | 1 | 1 | 24.620  |
| cgd5_4430 | WD40 repeat protein                                                                         |   |   |   | 1 | 1 | 6.831   |
| cgd5_4460 | hypothetical protein                                                                        | 1 |   |   |   | 1 | 0.357   |
| cgd5_4480 | large low complexity protein, possible apicomplexan-specific                                | 1 |   |   |   | 1 | 0.391   |
| cgd5_4490 | hypothetical protein                                                                        | 1 |   |   |   | 1 | 0.383   |
| cgd5_450  | possible ring domain protein                                                                |   |   |   | 1 | 1 | 20.869  |
| cgd5_4500 | possible vacuolar protein sorting associated protein (VPS)                                  | 1 |   |   |   | 1 | 0.318   |
| cgd5_4510 | hypothetical protein                                                                        | 1 |   |   |   | 1 | 0.473   |
| cgd5_4570 | hypothetical protein                                                                        | 1 | 1 |   |   | 2 | 1.037   |
| cgd5_470  | hypothetical protein                                                                        | 1 |   |   |   | 1 | 0.303   |
| cgd5_540  | hypothetical protein                                                                        | 1 | 1 |   |   | 2 | 0.997   |
| cgd5_550  | hypothetical protein                                                                        | 1 |   |   |   | 1 | 0.399   |
| cgd5_630  | protein with 4 ankyrin repeats plus a bromodomain.                                          |   |   |   |   | 1 | 30.961  |
| cgd5_740  | WD repeat protein                                                                           | 1 |   |   |   | 1 | 0.495   |
| cgd5_760  | hypothetical protein                                                                        | 1 |   |   |   | 1 | 0.365   |
| cgd5_780  | hypothetical protein                                                                        | 1 |   |   |   | 1 | 0.393   |
| cgd5_80   | hypothetical protein                                                                        | 1 |   |   |   | 1 | 0.401   |
| cgd5_800  | hypothetical protein                                                                        |   |   |   | 1 | 1 | 25.323  |
| cgd5_810  | leucine-rich repeat protein                                                                 |   | 1 |   |   | 1 | 1.859   |
| cgd5_840  | PP2C like phosphatase                                                                       | 1 |   |   |   | 1 | 0.589   |
| cgd5_860  | hypothetical protein                                                                        | 1 |   |   |   | 1 | 0.377   |
| cgd5_870  | hypothetical protein                                                                        |   |   |   | 1 | 1 | 8.797   |
| cgd5_880  | VirR/VirH family protein                                                                    |   | 1 |   |   | 1 | 1.394   |
| cgd5_890  | hypothetical protein                                                                        | 1 |   |   |   | 1 | 0.374   |
| cgd5_90   | hypothetical protein                                                                        |   | 1 |   |   | 1 | 2.157   |
| cgd5_910  | protein with conserved domain that is fused in vertebrates to neutralized domain repeats    | 1 |   |   |   | 1 | 0.523   |
| cgd5_960  | Oxr1p like TLDc domain containing protein                                                   |   |   |   | 1 | 1 | 3.565   |
| cgd5_990  | hypothetical protein                                                                        |   | 1 |   |   | 1 | 1.669   |
| cgd6_10   | hypothetical protein with signal peptide and cysteine rich region at the C-terminus         |   |   |   |   | 1 | 525.219 |
| cgd6_100  | leucine rich repeat (LRR) protein                                                           |   |   |   |   | 1 | 52.251  |
| cgd6_1000 | hypothetical protein with signal peptide                                                    |   |   |   | 1 | 1 | 3.401   |
| cgd6_1030 | hypothetical protein with signal peptide                                                    |   | 1 |   |   | 1 | 1.861   |
| cgd6_1060 | protein with spectrin repeats, CG12008-like                                                 | 1 |   |   |   | 1 | 0.473   |
| cgd6_1110 | signal peptide-containing protein                                                           | 1 |   |   |   | 1 | 0.336   |
| cgd6_1130 | hypothetical protein with signal peptide                                                    | 1 |   |   |   | 1 | 0.369   |
| cgd6_1140 | hypothetical protein                                                                        |   | 1 |   |   | 1 | 1.945   |
| cgd6_1150 | hypothetical protein                                                                        |   |   |   | 1 | 1 | 9.157   |
| cgd6_1160 | hypothetical protein                                                                        | 1 |   |   |   | 1 | 0.289   |
| cgd6_1180 | large protein with signal peptide                                                           | 1 |   |   |   | 1 | 0.426   |
| cgd6_1210 | hypothetical protein                                                                        |   |   |   | 1 | 1 | 3.288   |
| cgd6_1220 | hypothetical protein                                                                        | 1 |   |   |   | 1 | 0.313   |
| cgd6_1240 | hypothetical protein                                                                        | 1 |   |   |   | 1 | 0.442   |
| cgd6_1250 | hypothetical protein                                                                        | 1 |   |   |   | 1 | 0.322   |
| cgd6_1260 | hypothetical protein                                                                        | 1 |   |   |   | 1 | 0.345   |
| cgd6_1280 | hypothetical protein with one or more transmembrane domain                                  | 1 |   |   |   | 1 | 0.431   |
| cgd6_1290 | ring finger, membrane associated, possible signal peptide                                   | 1 |   |   |   | 1 | 0.326   |
| cgd6_1330 | 3CCCH domain containing protein                                                             | 1 |   |   |   | 1 | 0.543   |
| cgd6_1400 | hypothetical protein                                                                        | 1 |   |   |   | 1 | 0.447   |
| cgd6_1460 | Sec14 domain containing protein                                                             |   | 1 |   |   | 1 | 1.626   |
| cgd6_1470 | protein with SET domain flanked by cysteine clusters plus a C-terminal PHD domain           |   |   |   |   | 1 | 6.961   |
| cgd6_1500 | cytochrome c oxidase subunit III with 6 transmembrane domains (Note: unknown)               |   |   |   | 1 | 1 | 3.545   |
| cgd6_1540 | possible histone mRNA hairpin-binding protein                                               | 1 |   |   |   | 1 | 0.379   |
| cgd6_1560 | Yju2p / cwf16-like; Zn finger                                                               |   | 1 |   |   | 1 | 1.504   |
| cgd6_1600 | hypothetical protein                                                                        | 1 |   |   |   | 1 | 0.345   |
| cgd6_1610 | hypothetical protein                                                                        |   |   |   | 1 | 1 | 3.332   |
| cgd6_1670 | MJ1332/Ygr210cp-like GTP binding protein; GTPase OBG family plus RNA binding domain TGS     | 1 |   |   |   | 1 | 0.326   |
| cgd6_1700 | RRM domain containing protein                                                               |   |   |   | 1 | 1 | 2.541   |
| cgd6_1710 | Mcm10p-like'Mcm10p-like'                                                                    | 1 |   |   |   | 1 | 0.508   |
| cgd6_1740 | Tra1p-like; C-terminal FAT domain plus phosphoinositide 3-kinase domain; very large protein |   | 1 |   |   | 1 | 2.182   |
| cgd6_1770 | protein with C2H2 Zn finger, ASR2B-like N- and C-terminus                                   | 1 |   |   |   | 1 | 0.417   |
| cgd6_1790 | hypothetical protein                                                                        | 1 |   |   |   | 1 | 0.410   |

|           |                                                                                                                                                  |   |   |   |   |   |         |
|-----------|--------------------------------------------------------------------------------------------------------------------------------------------------|---|---|---|---|---|---------|
| cgd6_180  | hypothetical protein                                                                                                                             | 1 |   |   |   | 1 | 0.533   |
| cgd6_1810 | hypothetical protein                                                                                                                             | 1 |   |   |   | 1 | 0.431   |
| cgd6_1870 | signal recognition particle SPR19                                                                                                                |   |   | 1 |   | 1 | 2.326   |
| cgd6_1880 | CG9286/Bcp1p/BRCA and CDKN1A-interacting protein isoform C-like                                                                                  |   |   |   | 1 | 1 | 28.430  |
| cgd6_1890 | hypothetical predicted protein, unknown function                                                                                                 |   |   |   | 1 | 1 | 10.542  |
| cgd6_190  | hypothetical protein                                                                                                                             | 1 |   |   |   | 1 | 0.418   |
| cgd6_1930 | uncharacterized coiled-coil protein                                                                                                              | 1 |   |   |   | 1 | 0.366   |
| cgd6_1940 | hypothetical protein                                                                                                                             | 1 |   |   |   | 1 | 0.340   |
| cgd6_1980 | hypothetical protein with a signal peptide                                                                                                       |   | 1 |   |   | 1 | 1.510   |
| cgd6_2160 | hypothetical protein                                                                                                                             |   | 1 |   |   | 1 | 1.352   |
| cgd6_2190 | TBC domain containing protein                                                                                                                    | 1 |   |   |   | 1 | 0.384   |
| cgd6_2200 | leucine-rich repeats protein                                                                                                                     |   | 1 |   |   | 1 | 2.148   |
| cgd6_2240 | protein with N-terminal apicomplexan-specific globular domain plus PHD domain                                                                    |   | 1 |   |   | 1 | 1.555   |
| cgd6_2250 | myb proto-oncogene protein, putative                                                                                                             | 1 |   |   |   | 1 | 0.418   |
| cgd6_2270 | hypothetical membrane-associated protein with 12 transmembrane domains                                                                           |   |   |   | 1 | 1 | 10.387  |
| cgd6_2320 | multi-domain chromatin protein with WD40 repeats, bromodomain and PHD domain                                                                     | 1 |   |   |   | 1 | 0.331   |
| cgd6_2330 | hypothetical protein with signal peptide                                                                                                         |   |   |   | 1 | 1 | 19.882  |
| cgd6_2370 | Sec1-family protein                                                                                                                              | 1 |   |   |   | 1 | 0.298   |
| cgd6_2400 | hypothetical protein                                                                                                                             | 1 |   |   |   | 1 | 0.502   |
| cgd6_2410 | possible CutA1 divalent ion tolerance protein                                                                                                    | 1 |   |   |   | 1 | 0.376   |
| cgd6_250  | hypothetical protein                                                                                                                             | 1 |   |   |   | 1 | 0.349   |
| cgd6_2500 | hypothetical protein with possible signal peptide                                                                                                |   |   | 1 |   | 1 | 3.413   |
| cgd6_2530 | hypothetical protein                                                                                                                             |   |   |   | 1 | 1 | 12.706  |
| cgd6_2570 | MORN domain repeat containing protein                                                                                                            |   | 1 |   |   | 1 | 2.053   |
| cgd6_2580 | hypothetical protein of low complexity                                                                                                           |   | 1 |   |   | 1 | 1.795   |
| cgd6_2600 | hypothetical protein                                                                                                                             |   |   |   | 1 | 1 | 337.215 |
| cgd6_2630 | hypothetical protein                                                                                                                             | 1 |   |   |   | 1 | 0.520   |
| cgd6_2670 | hypothetical protein                                                                                                                             | 1 |   |   |   | 1 | 0.282   |
| cgd6_2680 | hypothetical protein                                                                                                                             | 1 |   |   |   | 1 | 0.411   |
| cgd6_270  | hypothetical protein                                                                                                                             |   | 1 |   |   | 1 | 1.398   |
| cgd6_2700 | Low complexity protein, possible apicomplexan conserved                                                                                          |   | 1 |   |   | 1 | 1.848   |
| cgd6_2710 | hypothetical protein                                                                                                                             |   | 1 |   |   | 1 | 2.136   |
| cgd6_2720 | hypothetical protein having a signal peptide and transmembrane domain within C- terminus                                                         |   |   |   | 1 | 1 | 124.461 |
| cgd6_2760 | hypothetical protein                                                                                                                             |   |   |   | 1 | 1 | 40.847  |
| cgd6_280  | hypothetical protein                                                                                                                             | 1 |   |   |   | 1 | 0.350   |
| cgd6_2800 | t24f1.1 protein, putative                                                                                                                        | 1 |   |   |   | 1 | 0.397   |
| cgd6_2810 | hypothetical protein                                                                                                                             |   | 1 |   |   | 1 | 2.239   |
| cgd6_2850 | hypothetical protein                                                                                                                             | 1 |   |   |   | 1 | 0.431   |
| cgd6_2860 | uncharacterized coiled coil protein                                                                                                              | 1 |   |   |   | 1 | 0.556   |
| cgd6_2870 | hypothetical protein                                                                                                                             |   | 1 |   |   | 1 | 1.418   |
| cgd6_2880 | hypothetical protein                                                                                                                             |   | 1 |   |   | 1 | 1.791   |
| cgd6_2890 | hypothetical protein                                                                                                                             | 1 |   |   |   | 1 | 0.419   |
| cgd6_290  | hypothetical protein                                                                                                                             | 1 |   |   |   | 1 | 0.281   |
| cgd6_2910 | hypothetical protein with signal peptide                                                                                                         | 1 |   |   |   | 1 | 0.378   |
| cgd6_2920 | hypothetical protein with signal peptide                                                                                                         | 1 |   |   |   | 1 | 0.390   |
| cgd6_2950 | large low complexity with PFL0360c_pfal like Znfinger                                                                                            |   | 1 |   |   | 1 | 1.291   |
| cgd6_2960 | Bax inhibitor-1 (BI-1), integral membrane protien with 6 or more transmembrane domains                                                           |   |   |   | 1 | 1 | 31.965  |
| cgd6_2980 | hypothetical protein with conserved cysteines as in riboflavin-binding protein precursor (RBP), contains signal peptide plus possible GPI anchor |   |   |   | 1 | 1 | 5.870   |
| cgd6_2990 | hypothetical protein                                                                                                                             | 1 |   |   |   | 1 | 0.426   |
| cgd6_300  | hypothetical protein                                                                                                                             | 1 |   |   |   | 1 | 0.505   |
| cgd6_3030 | protein with C-terminal RCC1 domain                                                                                                              | 1 |   |   |   | 1 | 0.397   |
| cgd6_3040 | hypothetical protein                                                                                                                             | 1 |   |   |   | 1 | 0.459   |
| cgd6_3050 | hypothetical protein with a signal peptide                                                                                                       |   | 1 |   |   | 1 | 1.768   |
| cgd6_3060 | hypothetical protein                                                                                                                             | 1 |   |   |   | 1 | 0.218   |
| cgd6_3070 | hypothetical protein with a signal peptide                                                                                                       |   |   |   | 1 | 1 | 7.640   |
| cgd6_3080 | hypothetical protein with a signal peptide                                                                                                       |   |   | 1 |   | 1 | 2.799   |
| cgd6_3090 | hypothetical protein                                                                                                                             | 1 |   |   |   | 1 | 0.266   |
| cgd6_310  | hypothetical protein                                                                                                                             | 1 |   |   |   | 1 | 0.346   |
| cgd6_3110 | hypothetical protein                                                                                                                             | 1 |   |   |   | 1 | 0.412   |
| cgd6_3120 | hypothetical protein                                                                                                                             | 1 |   |   |   | 1 | 0.270   |
| cgd6_3130 | hypothetical protein                                                                                                                             |   |   |   | 1 | 1 | 50.680  |
| cgd6_3150 | hypothetical protein                                                                                                                             | 1 |   |   |   | 1 | 0.342   |
| cgd6_3160 | large low complexity protein                                                                                                                     |   | 1 |   |   | 1 | 2.261   |
| cgd6_3170 | Sel1 protein, putative                                                                                                                           | 1 |   |   |   | 1 | 0.538   |
| cgd6_3200 | hypothetical protein                                                                                                                             | 1 |   |   |   | 1 | 0.497   |
| cgd6_3250 | hypothetical protein                                                                                                                             | 1 |   |   |   | 1 | 0.382   |
| cgd6_330  | hypothetical protein                                                                                                                             |   |   |   | 1 | 1 | 11.034  |
| cgd6_3300 | Yir323cp/Cwc24 p family; CCCH+ringfinger domains                                                                                                 | 1 |   |   |   | 1 | 0.365   |
| cgd6_3310 | hypothetical protein with signal peptide                                                                                                         | 1 |   |   |   | 1 | 0.335   |
| cgd6_3320 | hypothetical protein                                                                                                                             | 1 |   |   |   | 1 | 0.257   |

|           |                                                                                                       |   |   |   |   |           |
|-----------|-------------------------------------------------------------------------------------------------------|---|---|---|---|-----------|
| cgd6_3430 | RRM (2xRRMs) domaincontaining protein                                                                 |   | 1 |   | 1 | 1.448     |
| cgd6_3440 | hypothetical protein                                                                                  |   |   | 1 | 1 | 13.023    |
| cgd6_3450 | EBNA1 binding protein 2; nucleolar protein p40                                                        |   |   | 1 | 1 | 138.327   |
| cgd6_3460 | hypothetical protein                                                                                  |   | 1 |   | 1 | 3.152     |
| cgd6_3470 | hypothetical protein                                                                                  |   |   | 1 | 1 | 30.420    |
| cgd6_3480 | hypothetical protein                                                                                  |   |   | 1 | 1 | 46.390    |
| cgd6_3490 | RNA-binding protein, putative                                                                         |   |   | 1 | 1 | 9.166     |
| cgd6_350  | hypothetical protein                                                                                  | 1 |   |   | 1 | 0.342     |
| cgd6_3500 | hypothetical protein                                                                                  |   | 1 |   | 1 | 6.298     |
| cgd6_3510 | hypothetical protein                                                                                  |   | 1 |   | 1 | 4.376     |
| cgd6_3520 | hypothetical protein                                                                                  |   |   | 1 | 1 | 15.332    |
| cgd6_360  | hypothetical protein                                                                                  | 1 |   |   | 1 | 0.368     |
| cgd6_3610 | hypothetical predicted WD-40 repeat protein, unknown function                                         |   |   | 1 | 1 | 5.595     |
| cgd6_3650 | signal peptide, large secreted protein with N terminal ankyrin repeats + 8+ transmembrane domain      | 1 |   |   | 1 | 0.543     |
| cgd6_3660 | hypothetical protein                                                                                  |   | 1 |   | 1 | 1.346     |
| cgd6_3670 | hypothetical protein                                                                                  | 1 |   |   | 1 | 0.253     |
| cgd6_3680 | Low complexity hypothetical protein                                                                   | 1 |   |   | 1 | 0.425     |
| cgd6_3740 | 41-2 protein antigen precursor                                                                        |   |   | 1 | 1 | 3.381     |
| cgd6_3760 | hypothetical protein                                                                                  |   |   | 1 | 1 | 113.466   |
| cgd6_3770 | hypothetical protein                                                                                  | 1 |   |   | 1 | 0.426     |
| cgd6_380  | hypothetical protein with signal peptide and 4 transmembrane domains, possible apicomplexan conserved | 1 |   |   | 1 | 0.289     |
| cgd6_3810 | NUDIX domain protein; mRNA cleavage factor-like protein Im like, plant+animal group                   |   |   | 1 | 1 | 4.787     |
| cgd6_3840 | SET domain containing protein                                                                         |   | 1 |   | 1 | 3.366     |
| cgd6_3890 | hypothetical protein                                                                                  | 1 |   |   | 1 | 0.598     |
| cgd6_390  | hypothetical protein                                                                                  | 1 |   |   | 1 | 0.511     |
| cgd6_3900 | hypothetical protein                                                                                  |   | 1 |   | 1 | 2.364     |
| cgd6_3920 | hypothetical protein with signal peptide                                                              |   |   | 1 | 1 | 1,276.224 |
| cgd6_3930 | hypothetical protein                                                                                  |   | 1 |   | 1 | 2.404     |
| cgd6_3940 | hypothetical protein                                                                                  |   |   | 1 | 1 | 3.502     |
| cgd6_3950 | uncharacterized protein                                                                               | 1 |   |   | 1 | 0.358     |
| cgd6_3980 | hypothetical protein                                                                                  |   |   | 1 | 1 | 16.534    |
| cgd6_4000 | hypothetical protein having a signal peptide                                                          |   | 1 |   | 1 | 1.864     |
| cgd6_4010 | hypothetical protein                                                                                  | 1 |   |   | 1 | 0.434     |
| cgd6_4050 | uncharacterized apicomplexan-specific protein                                                         | 1 |   |   | 1 | 0.419     |
| cgd6_4070 | hypothetical protein                                                                                  |   | 1 |   | 1 | 2.339     |
| cgd6_4090 | hypothetical low complexity protein                                                                   | 1 |   |   | 1 | 0.333     |
| cgd6_4110 | hypothetical protein                                                                                  |   |   | 1 | 1 | 55.956    |
| cgd6_4140 | coiled coil protein                                                                                   | 1 |   |   | 1 | 0.275     |
| cgd6_4160 | EF-hands domain containing protein                                                                    |   |   | 1 | 1 | 19.666    |
| cgd6_4170 | hypothetical protein                                                                                  |   |   | 1 | 1 | 6.004     |
| cgd6_4230 | hypothetical protein containing a signal peptide                                                      |   |   | 1 | 1 | 27.021    |
| cgd6_4240 | MO25 protein                                                                                          | 1 |   |   | 1 | 0.296     |
| cgd6_4260 | Low complexity protein                                                                                |   | 1 |   | 1 | 4.521     |
| cgd6_4280 | hypothetical protein having a signal peptide                                                          |   |   | 1 | 1 | 56.925    |
| cgd6_4290 | large protein having a MATH plus possible UBC hydrolase plus type I pseudosyn plus hexapeptide        |   | 1 |   | 1 | 3.691     |
| cgd6_4300 | uncharacterized coiled coil protein                                                                   | 1 |   |   | 1 | 0.505     |
| cgd6_4360 | hypothetical protein having a signal peptide and 4 transmembrane domains                              |   | 1 |   | 1 | 1.677     |
| cgd6_4390 | hypothetical low complexity protein                                                                   | 1 |   |   | 1 | 0.529     |
| cgd6_4430 | hypothetical protein                                                                                  | 1 |   |   | 1 | 0.394     |
| cgd6_4460 | large protein with ARM repeats                                                                        |   |   | 1 | 1 | 19.317    |
| cgd6_4470 | hypothetical low complexity protein with signal peptide                                               |   |   | 1 | 1 | 53.627    |
| cgd6_450  | hypothetical protein                                                                                  |   | 1 |   | 1 | 1.370     |
| cgd6_4520 | hypothetical protein                                                                                  | 1 |   |   | 1 | 0.460     |
| cgd6_4590 | ankyrin-related protein, putative                                                                     |   |   | 1 | 1 | 9.386     |
| cgd6_460  | hypothetical protein                                                                                  | 1 | 1 |   | 2 | 1.033     |
| cgd6_4640 | hypothetical protein                                                                                  | 1 |   |   | 1 | 0.347     |
| cgd6_4690 | SAC3/GANP/Rpn12p family                                                                               |   |   | 1 | 1 | 8.863     |
| cgd6_470  | hypothetical protein                                                                                  | 1 |   |   | 1 | 0.284     |
| cgd6_4720 | hypothetical protein                                                                                  |   |   | 1 | 1 | 7.312     |
| cgd6_4790 | predicted degraded Zn-finger +bbox Zn finger protein                                                  | 1 |   |   | 1 | 0.372     |
| cgd6_480  | hypothetical protein                                                                                  | 1 |   |   | 1 | 0.392     |
| cgd6_4800 | hypothetical protein                                                                                  | 1 |   |   | 1 | 0.330     |
| cgd6_4810 | hypothetical protein                                                                                  | 1 |   |   | 1 | 0.338     |
| cgd6_4820 | hypothetical protein                                                                                  | 1 |   |   | 1 | 0.346     |
| cgd6_4870 | hypothetical protein                                                                                  |   | 1 |   | 1 | 3.241     |
| cgd6_4950 | hypothetical protein                                                                                  |   |   | 1 | 1 | 114.487   |
| cgd6_50   | hypothetical protein                                                                                  | 1 |   |   | 1 | 0.599     |
| cgd6_5010 | hypothetical protein                                                                                  |   | 1 |   | 1 | 1.590     |
| cgd6_5020 | protein with WD40 repeats                                                                             |   | 1 |   | 1 | 1.837     |
| cgd6_5030 | hypothetical protein                                                                                  |   |   | 1 | 1 | 10.895    |
| cgd6_5050 | hypothetical protein                                                                                  | 1 |   |   | 1 | 0.368     |
| cgd6_5110 | large hypothetical protein with possible signal peptide                                               |   |   | 1 | 1 | 11.007    |

|           |                                                                                                                                                            |   |  |   |  |   |        |
|-----------|------------------------------------------------------------------------------------------------------------------------------------------------------------|---|--|---|--|---|--------|
| cgd6_5120 | protein with two PHD Zn fingers that is probably involved in chromatin function                                                                            |   |  | 1 |  | 1 | 3.547  |
| cgd6_5150 | ring finger protein                                                                                                                                        | 1 |  |   |  | 1 | 0.434  |
| cgd6_5160 | hypothetical protein with conserved carboxy terminal region (KIAA1078 protein)                                                                             | 1 |  |   |  | 1 | 0.495  |
| cgd6_5170 | hypothetical protein                                                                                                                                       | 1 |  |   |  | 1 | 0.412  |
| cgd6_5180 | hypothetical protein having a transmembrane domain within N-terminus                                                                                       | 1 |  |   |  | 1 | 0.444  |
| cgd6_5220 | cysteine-rich protein with zinc finger                                                                                                                     | 1 |  |   |  | 1 | 0.286  |
| cgd6_5230 | hypothetical protein                                                                                                                                       | 1 |  |   |  | 1 | 0.294  |
| cgd6_5270 | hypothetical protein with possible signal peptide                                                                                                          |   |  | 1 |  | 1 | 1.682  |
| cgd6_5280 | hypothetical protein with signal peptide                                                                                                                   |   |  | 1 |  | 1 | 1.537  |
| cgd6_530  | Low complexity protein having signal peptide and glycine-rich repeat at C-terminal region                                                                  |   |  | 1 |  | 1 | 4.522  |
| cgd6_5300 | hypothetical protein                                                                                                                                       | 1 |  |   |  | 1 | 0.319  |
| cgd6_5310 | hypothetical protein with signal peptide                                                                                                                   |   |  | 1 |  | 1 | 2.057  |
| cgd6_5360 | hypothetical protein with signal peptide                                                                                                                   | 1 |  |   |  | 1 | 0.361  |
| cgd6_5370 | hypothetical protein                                                                                                                                       | 1 |  |   |  | 1 | 0.374  |
| cgd6_5390 | hypothetical protein, signal peptide                                                                                                                       |   |  | 1 |  | 1 | 1.771  |
| cgd6_5420 | hypothetical protein, signal peptide                                                                                                                       |   |  | 1 |  | 1 | 1.454  |
| cgd6_5440 | hypothetical protein, signal peptide, paralogs                                                                                                             |   |  |   |  | 1 | 18.558 |
| cgd6_600  | hypothetical protein                                                                                                                                       | 1 |  |   |  | 1 | 0.314  |
| cgd6_770  | hypothetical protein                                                                                                                                       |   |  |   |  | 1 | 6.692  |
| cgd6_810  | swift like BRCT domain                                                                                                                                     | 1 |  |   |  | 1 | 0.479  |
| cgd6_820  | predicted secreted low complexity protein with a signal peptide                                                                                            |   |  | 1 |  | 1 | 2.042  |
| cgd6_840  | shanti/Ykl100cp/Minor histocompatibility antigen H13-like; presenilin, signal peptide peptidase family, with 10 transmembrane domains and a signal peptide | 1 |  |   |  | 1 | 0.558  |
| cgd6_860  | hypothetical protein                                                                                                                                       |   |  | 1 |  | 1 | 1.384  |
| cgd6_940  | pescadillo containing BRCT domain                                                                                                                          |   |  |   |  | 1 | 36.922 |
| cgd6_950  | Pdr17p-like Sec14 domain containing protein                                                                                                                |   |  | 1 |  | 1 | 2.092  |
| cgd6_970  | hypothetical protein                                                                                                                                       | 1 |  |   |  | 1 | 0.472  |
| cgd7_10   | hypothetical protein                                                                                                                                       |   |  |   |  | 1 | 31.885 |
| cgd7_100  | ring domain-containing protein                                                                                                                             |   |  |   |  | 1 | 9.033  |
| cgd7_1000 | F27M3_19 plant like RRM plus AlkB domain containing protein                                                                                                |   |  | 1 |  | 1 | 1.991  |
| cgd7_1010 | very large low complexity protein                                                                                                                          |   |  | 1 |  | 1 | 1.997  |
| cgd7_1020 | G10 protein                                                                                                                                                |   |  | 1 |  | 1 | 3.007  |
| cgd7_1030 | hypothetical protein                                                                                                                                       |   |  | 1 |  | 1 | 1.512  |
| cgd7_1050 | hypothetical protein                                                                                                                                       |   |  |   |  | 1 | 15.256 |
| cgd7_1090 | hypothetical protein                                                                                                                                       | 1 |  |   |  | 1 | 0.292  |
| cgd7_1120 | 3CCCH domain containing protein                                                                                                                            |   |  |   |  | 1 | 7.978  |
| cgd7_1170 | protein containing ringfinger+4xC2H2+littlefinger domains                                                                                                  |   |  |   |  | 1 | 45.442 |
| cgd7_1210 | hypothetical protein containing a signal peptide                                                                                                           | 1 |  |   |  | 1 | 0.457  |
| cgd7_1220 | hypothetical protein containing a signal peptide                                                                                                           |   |  |   |  | 1 | 9.343  |
| cgd7_1230 | hypothetical protein                                                                                                                                       |   |  | 1 |  | 1 | 1.962  |
| cgd7_1270 | large hypothetical protein                                                                                                                                 |   |  | 1 |  | 1 | 2.567  |
| cgd7_1280 | hypothetical protein                                                                                                                                       |   |  | 1 |  | 1 | 4.180  |
| cgd7_1290 | hypothetical protein containing a signal peptide                                                                                                           |   |  | 1 |  | 1 | 2.501  |
| cgd7_1300 | hypothetical protein containing a signal peptide                                                                                                           | 1 |  |   |  | 1 | 0.507  |
| cgd7_1360 | protein with signal peptide and Sec14d domain, probably secreted                                                                                           |   |  |   |  | 1 | 16.514 |
| cgd7_1370 | hypothetical protein                                                                                                                                       |   |  | 1 |  | 1 | 4.150  |
| cgd7_1400 | signal peptide containing protein                                                                                                                          |   |  | 1 |  | 1 | 1.406  |
| cgd7_1420 | hypothetical protein                                                                                                                                       |   |  |   |  | 1 | 83.928 |
| cgd7_1440 | protein with 5 TPR domains                                                                                                                                 |   |  | 1 |  | 1 | 2.511  |
| cgd7_1450 | hypothetical protein                                                                                                                                       |   |  | 1 |  | 1 | 2.045  |
| cgd7_1470 | hypothetical protein                                                                                                                                       |   |  | 1 |  | 1 | 1.691  |
| cgd7_1480 | hypothetical protein                                                                                                                                       |   |  | 1 |  | 1 | 2.881  |
| cgd7_1510 | hypothetical protein                                                                                                                                       |   |  | 1 |  | 1 | 2.009  |
| cgd7_1550 | uncharacterized protein                                                                                                                                    |   |  | 1 |  | 1 | 2.550  |
| cgd7_1570 | hypothetical protein                                                                                                                                       |   |  | 1 |  | 1 | 3.179  |
| cgd7_1580 | mb1 domain containing protein                                                                                                                              | 1 |  |   |  | 1 | 0.577  |
| cgd7_1610 | uncharacterized low complexity protein                                                                                                                     | 1 |  |   |  | 1 | 0.374  |
| cgd7_170  | hypothetical protein                                                                                                                                       |   |  |   |  | 1 | 9.088  |
| cgd7_1740 | Ing1 like PHD finger protein                                                                                                                               |   |  |   |  | 1 | 6.957  |
| cgd7_1770 | hypothetical protein                                                                                                                                       | 1 |  |   |  | 1 | 0.496  |
| cgd7_1790 | protein with BRIGHT domain like HTH domain at N-terminus                                                                                                   |   |  | 1 |  | 1 | 1.774  |
| cgd7_180  | hypothetical protein                                                                                                                                       |   |  | 1 |  | 1 | 1.895  |
| cgd7_1850 | SMC4'SMC4, chromosomal ATPase with giant coiled coil regions'                                                                                              | 1 |  |   |  | 1 | 0.395  |
| cgd7_1870 | hypothetical protein                                                                                                                                       | 1 |  |   |  | 1 | 0.383  |
| cgd7_1890 | KH domain protein                                                                                                                                          |   |  |   |  | 1 | 13.547 |
| cgd7_190  | hypothetical protein                                                                                                                                       | 1 |  |   |  | 1 | 0.313  |
| cgd7_1920 | hypothetical protein                                                                                                                                       | 1 |  |   |  | 1 | 0.491  |
| cgd7_1990 | hypothetical protein                                                                                                                                       |   |  | 1 |  | 1 | 4.679  |
| cgd7_200  | hypothetical protein with signal peptide                                                                                                                   |   |  |   |  | 1 | 30.975 |
| cgd7_2010 | hypothetical membrane protein                                                                                                                              | 1 |  |   |  | 1 | 0.400  |
| cgd7_2020 | hypothetical protein                                                                                                                                       | 1 |  |   |  | 1 | 0.321  |

|           |                                                                                 |   |   |   |   |   |         |
|-----------|---------------------------------------------------------------------------------|---|---|---|---|---|---------|
| cgd7_2050 | Hch1p like mystery proteins.                                                    |   | 1 |   |   | 1 | 2.053   |
| cgd7_2070 | large membrane associated channel                                               |   | 1 |   |   | 1 | 1.309   |
| cgd7_2120 | hypothetical protein                                                            | 1 |   |   |   | 1 | 0.370   |
| cgd7_2130 | uncharacterized protein                                                         | 1 |   |   |   | 1 | 0.446   |
| cgd7_2180 | hypothetical protein                                                            |   | 1 |   |   | 1 | 1.589   |
| cgd7_2200 | hypothetical protein, signal peptide                                            |   |   |   | 1 | 1 | 7.292   |
| cgd7_2220 | hypothetical protein                                                            |   |   | 1 |   | 1 | 4.994   |
| cgd7_2230 | coiled coil protein                                                             |   | 1 |   |   | 1 | 1.648   |
| cgd7_2240 | hypothetical protein, signal peptide, possible secreted protein                 |   |   |   | 1 | 1 | 32.330  |
| cgd7_2270 | hypothetical low complexity protein                                             |   |   |   | 1 | 1 | 22.495  |
| cgd7_2290 | hypothetical protein                                                            |   |   |   | 1 | 1 | 49.785  |
| cgd7_2340 | large secreted protein, signal peptide                                          | 1 |   |   |   | 1 | 0.387   |
| cgd7_2350 | hypothetical small protein, possible signal peptide                             | 1 |   |   |   | 1 | 0.487   |
| cgd7_2360 | eukaryotic membrane protein with transmembrane domains near C- and N- regions   | 1 |   |   |   | 1 | 0.457   |
| cgd7_240  | hypothetical protein                                                            |   |   | 1 |   | 1 | 4.059   |
| cgd7_2410 | signal peptide, secreted low complexity protein                                 |   |   |   | 1 | 1 | 26.511  |
| cgd7_2440 | giant membrane protein                                                          |   | 1 |   |   | 1 | 1.992   |
| cgd7_2500 | Skp1 family protein, putative                                                   |   |   | 1 |   | 1 | 3.881   |
| cgd7_2550 | hypothetical protein                                                            |   |   |   | 1 | 1 | 5.948   |
| cgd7_2600 | Low complexity protein, putative                                                |   |   | 1 |   | 1 | 4.134   |
| cgd7_2610 | POZ+kelch domain protein with kelch repeats at the C-terminus                   | 1 |   |   |   | 1 | 0.473   |
| cgd7_2640 | TPR repeat protein                                                              |   |   |   | 1 | 1 | 56.445  |
| cgd7_2700 | SMC3'SMC type chromosomal ABC ATPase'                                           | 1 |   |   |   | 1 | 0.555   |
| cgd7_2710 | ataxin2 related nudix domain protein (RNA processing phosphatase/ATPase domain) | 1 |   |   |   | 1 | 0.515   |
| cgd7_2720 | FALZ protein                                                                    | 1 |   |   |   | 1 | 0.482   |
| cgd7_2740 | WD40 protein                                                                    | 1 |   |   |   | 1 | 0.394   |
| cgd7_2770 | uncharacterized low complexity protein                                          | 1 |   |   |   | 1 | 0.617   |
| cgd7_2790 | regena domain protein (CCR-Not complex protein subunit 3), putative             |   | 1 |   |   | 1 | 1.288   |
| cgd7_2830 | hypothetical low complexity protein                                             |   | 1 |   |   | 1 | 2.091   |
| cgd7_2860 | uncharacterized protein with predicted coiled coil regions                      | 1 |   |   |   | 1 | 0.427   |
| cgd7_2870 | uncharacterized low complexity protein                                          |   |   | 1 |   | 1 | 2.529   |
| cgd7_2880 | hypothetical protein                                                            | 1 |   |   |   | 1 | 0.414   |
| cgd7_2890 | SLBP family of RNA binding proteins                                             | 1 |   |   |   | 1 | 0.421   |
| cgd7_2930 | hypothetical protein                                                            | 1 |   |   |   | 1 | 0.510   |
| cgd7_2960 | hypothetical protein                                                            | 1 |   |   |   | 1 | 0.454   |
| cgd7_2980 | Low complexity protein witha potential C2C2 zinc ribbon                         | 1 |   |   |   | 1 | 0.302   |
| cgd7_2990 | hypothetical protein                                                            |   |   | 1 |   | 1 | 2.247   |
| cgd7_30   | large uncharacterized protein                                                   |   |   |   | 1 | 1 | 15.229  |
| cgd7_3000 | hypothetical protein                                                            |   |   |   | 1 | 1 | 37.047  |
| cgd7_3010 | cysteine-rich protein                                                           |   |   |   | 1 | 1 | 419.549 |
| cgd7_3080 | hypothetical protein                                                            | 1 |   |   |   | 1 | 0.296   |
| cgd7_3090 | uncharacterized low complexity protein                                          | 1 |   |   |   | 1 | 0.476   |
| cgd7_3150 | eukaryote specific membrane proteins signal peptide plus 8 transmembrane domain | 1 |   |   |   | 1 | 0.342   |
| cgd7_3190 | protein with 3 CCCH domains                                                     |   |   |   | 1 | 1 | 35.565  |
| cgd7_3210 | hypothetical protein                                                            |   |   | 1 |   | 1 | 3.225   |
| cgd7_3230 | SLBP family of RNA binding proteins                                             | 1 |   |   |   | 1 | 0.572   |
| cgd7_3260 | SWIB domain protein                                                             | 1 |   |   |   | 1 | 0.512   |
| cgd7_3280 | JAB domain containing protein                                                   |   | 1 |   |   | 1 | 1.760   |
| cgd7_3310 | hypothetical protein                                                            |   |   | 1 |   | 1 | 3.165   |
| cgd7_3320 | ring finger protein                                                             |   |   |   | 1 | 1 | 61.043  |
| cgd7_3340 | hypothetical protein                                                            | 1 |   |   |   | 1 | 0.457   |
| cgd7_3420 | hypothetical protein                                                            |   |   |   | 1 | 1 | 33.212  |
| cgd7_3440 | hypothetical protein                                                            |   |   | 1 |   | 1 | 3.585   |
| cgd7_3460 | hypothetical protein                                                            | 1 |   |   |   | 1 | 0.334   |
| cgd7_3470 | large low complexity protein, potential zinc ribbon                             | 1 |   |   |   | 1 | 0.430   |
| cgd7_3500 | hypothetical protein                                                            |   |   |   | 1 | 1 | 6.395   |
| cgd7_3520 | hypothetical protein                                                            |   | 1 |   |   | 1 | 1.769   |
| cgd7_3570 | hypothetical protein                                                            | 1 |   |   |   | 1 | 0.473   |
| cgd7_3580 | kelch repeats protein                                                           |   |   | 1 |   | 1 | 3.080   |
| cgd7_3640 | YjeF family of predicted nucleotide binding proteins                            |   |   | 1 |   | 1 | 4.188   |
| cgd7_3680 | TPR repeat protein                                                              | 1 |   |   |   | 1 | 0.317   |
| cgd7_3690 | crooked neck protein HAT repeats                                                | 1 |   |   |   | 1 | 0.470   |
| cgd7_370  | protein with a conserved N-terminal region                                      |   |   |   | 1 | 1 | 5.916   |
| cgd7_3700 | hypothetical protein                                                            | 1 |   |   |   | 1 | 0.321   |
| cgd7_3710 | LRR protein                                                                     | 1 |   |   |   | 1 | 0.342   |
| cgd7_3770 | hypothetical protein                                                            |   | 1 |   |   | 1 | 1.481   |
| cgd7_380  | hypothetical protein                                                            |   | 1 |   |   | 1 | 2.011   |
| cgd7_3850 | hypothetical protein                                                            |   | 1 |   |   | 1 | 1.400   |
| cgd7_3900 | hypothetical protein                                                            | 1 |   |   |   | 1 | 0.339   |
| cgd7_3920 | hypothetical protein                                                            |   | 1 |   |   | 1 | 1.747   |
| cgd7_3930 | hypothetical protein                                                            | 1 |   |   |   | 1 | 0.535   |
| cgd7_3980 | PX and WD40 domain protein                                                      | 1 |   |   |   | 1 | 0.531   |
| cgd7_3990 | hypothetical protein                                                            |   |   |   | 1 | 1 | 38.793  |

|           |                                                                                                                                                                                                   |   |   |   |   |   |         |
|-----------|---------------------------------------------------------------------------------------------------------------------------------------------------------------------------------------------------|---|---|---|---|---|---------|
| cgd7_400  | hypothetical protein, signal peptide                                                                                                                                                              |   | 1 |   |   | 1 | 1.895   |
| cgd7_4000 | hypothetical coiled coil protein                                                                                                                                                                  |   |   |   | 1 | 1 | 18.186  |
| cgd7_4030 | hypothetical low complexity protein                                                                                                                                                               |   |   | 1 |   | 1 | 4.739   |
| cgd7_4040 | hypothetical protein                                                                                                                                                                              |   |   |   | 1 | 1 | 13.507  |
| cgd7_4060 | signal recognition particle SPR72                                                                                                                                                                 |   |   |   | 1 | 1 | 13.736  |
| cgd7_410  | hypothetical protein                                                                                                                                                                              |   | 1 |   |   | 1 | 1.857   |
| cgd7_4100 | Ssm4 ring finger fused to a forkhead associated (FHA) domain (apicomplexan specific architecture)                                                                                                 |   |   |   | 1 | 1 | 3.457   |
| cgd7_4140 | WD40 domain protein                                                                                                                                                                               |   | 1 |   |   | 1 | 2.068   |
| cgd7_4170 | ring domain protein, possible 4 transmembrane domains                                                                                                                                             |   |   | 1 |   | 1 | 1.451   |
| cgd7_4180 | hypothetical protein                                                                                                                                                                              | 1 |   |   |   | 1 | 0.520   |
| cgd7_420  | protein with DEXDc plus ring plus HELICc; possible SNF2 domain                                                                                                                                    |   |   |   | 1 | 1 | 5.453   |
| cgd7_4200 | hypothetical protein                                                                                                                                                                              | 1 |   |   |   | 1 | 0.404   |
| cgd7_4230 | uncharacterized protein                                                                                                                                                                           |   | 1 |   |   | 1 | 1.848   |
| cgd7_4280 | signal peptide, large secreted protein                                                                                                                                                            |   |   |   | 1 | 1 | 7.912   |
| cgd7_4300 | Low complexity protein with coiled coil regions                                                                                                                                                   |   |   |   |   | 1 | 42.191  |
| cgd7_4320 | signal peptide, secreted protein                                                                                                                                                                  |   |   |   |   | 1 | 32.552  |
| cgd7_4330 | glycoprotein, putative                                                                                                                                                                            |   |   | 1 |   | 1 | 3.015   |
| cgd7_4340 | very large secreted protein, signal peptide                                                                                                                                                       | 1 |   |   |   | 1 | 0.420   |
| cgd7_4360 | hypothetical protein                                                                                                                                                                              |   |   |   |   | 1 | 43.413  |
| cgd7_4400 | coronin-type WD40 protein                                                                                                                                                                         |   | 1 |   |   | 1 | 1.401   |
| cgd7_4480 | T8M16_190 RRM protein of possible plant origin                                                                                                                                                    |   |   |   | 1 | 1 | 15.767  |
| cgd7_4490 | signal peptide-containing protein with transmembrane domain                                                                                                                                       | 1 |   |   |   | 1 | 0.506   |
| cgd7_4500 | signal peptide, large secreted protein                                                                                                                                                            | 1 |   |   |   | 1 | 0.420   |
| cgd7_4560 | gigantic extracellular protein with interesting sushi (9x) and archaeal protease type repeats having the domain architecture: signal peptide-CRYPB(3x)-sushi (9x)-archaeoglobus type repeats (2x) |   | 1 |   |   | 1 | 1.499   |
| cgd7_4570 | DID domain proteins (DID4/DID2 family)                                                                                                                                                            | 1 |   |   |   | 1 | 0.443   |
| cgd7_4630 | hypothetical protein                                                                                                                                                                              |   |   |   |   | 1 | 28.015  |
| cgd7_4650 | hypothetical protein                                                                                                                                                                              | 1 |   |   |   | 1 | 0.342   |
| cgd7_4670 | hypothetical protein                                                                                                                                                                              | 1 |   |   |   | 1 | 0.492   |
| cgd7_4700 | ring finger domain protein and 2 transmembrane domains                                                                                                                                            | 1 |   |   |   | 1 | 0.370   |
| cgd7_4720 | hypothetical protein                                                                                                                                                                              |   |   | 1 |   | 1 | 3.911   |
| cgd7_4750 | hypothetical protein                                                                                                                                                                              |   |   | 1 |   | 1 | 4.721   |
| cgd7_4830 | membrane proteins related to the mechanosensitive ion channel                                                                                                                                     | 1 |   |   |   | 1 | 0.403   |
| cgd7_4850 | hypothetical protein                                                                                                                                                                              |   | 1 |   |   | 1 | 1.170   |
| cgd7_4860 | uncharacterized protein                                                                                                                                                                           |   |   |   | 1 | 1 | 7.463   |
| cgd7_4870 | hypothetical protein                                                                                                                                                                              |   |   | 1 |   | 1 | 3.173   |
| cgd7_4890 | hypothetical protein                                                                                                                                                                              | 1 |   |   |   | 1 | 0.456   |
| cgd7_490  | hypothetical protein                                                                                                                                                                              |   |   |   |   | 1 | 34.212  |
| cgd7_4960 | Not4hp/Mot2p, RING finger+RRM domains                                                                                                                                                             |   |   |   | 1 | 1 | 6.481   |
| cgd7_500  | hypothetical protein                                                                                                                                                                              |   |   |   |   | 1 | 47.761  |
| cgd7_5030 | uncharacterized low complexity protein                                                                                                                                                            | 1 |   |   |   | 1 | 0.458   |
| cgd7_5040 | uncharacterized low complexity protein                                                                                                                                                            | 1 |   |   |   | 1 | 0.470   |
| cgd7_505  | hypothetical protein                                                                                                                                                                              |   | 1 |   |   | 1 | 1.780   |
| cgd7_5090 | SET domain protein with MYND insert (Skm/BOP family)                                                                                                                                              |   |   | 1 |   | 1 | 2.774   |
| cgd7_5110 | hypothetical low complexity protein                                                                                                                                                               |   | 1 |   |   | 1 | 1.447   |
| cgd7_5190 | uncharacterized protein with coiled coil regions                                                                                                                                                  |   | 1 |   |   | 1 | 2.104   |
| cgd7_5240 | uncharacterized protein                                                                                                                                                                           |   |   | 1 |   | 1 | 3.565   |
| cgd7_5290 | hedgehog-type HINT domain protein, possible animal horizontal transfer, signal peptide                                                                                                            | 1 |   |   |   | 1 | 0.442   |
| cgd7_5320 | Cwf5-like with 2 ZnR domains (CCCH and RRM domains missing)                                                                                                                                       |   |   |   |   | 1 | 39.267  |
| cgd7_5360 | uncharacterized protein                                                                                                                                                                           |   |   |   | 1 | 1 | 7.696   |
| cgd7_5370 | LigT, 2 H domain protein, involved in RNA processing                                                                                                                                              | 1 |   |   |   | 1 | 0.483   |
| cgd7_5380 | CtIP type zinc knuckle (C2H2)                                                                                                                                                                     | 1 |   | 1 |   | 2 | 2.062   |
| cgd7_540  | hypothetical protein with signal peptide and 8 or more transmembrane domains                                                                                                                      | 1 |   |   |   | 1 | 0.381   |
| cgd7_5410 | WD40 protein                                                                                                                                                                                      |   |   | 1 |   | 1 | 2.340   |
| cgd7_5420 | uncharacterized protein                                                                                                                                                                           | 1 |   |   |   | 1 | 0.404   |
| cgd7_5440 | very large low complexity protein, probably membrane associated                                                                                                                                   | 1 |   |   |   | 1 | 0.571   |
| cgd7_5470 | uncharacterized protein                                                                                                                                                                           |   |   |   | 1 | 1 | 17.188  |
| cgd7_5500 | large secreted protein                                                                                                                                                                            | 1 |   |   |   | 1 | 0.442   |
| cgd7_5520 | serine/threonine rich low complexity protein                                                                                                                                                      |   |   |   | 1 | 1 | 8.666   |
| cgd7_5530 | hypothetical protein                                                                                                                                                                              | 1 |   |   |   | 1 | 0.326   |
| cgd7_560  | hypothetical protein                                                                                                                                                                              | 1 |   |   |   | 1 | 0.387   |
| cgd7_570  | protein with 2 TPR domains                                                                                                                                                                        |   |   |   | 1 | 1 | 7.043   |
| cgd7_600  | hypothetical protein                                                                                                                                                                              | 1 |   |   |   | 1 | 0.297   |
| cgd7_620  | Sec14d domain containing protein                                                                                                                                                                  |   |   |   | 1 | 1 | 7.669   |
| cgd7_680  | hypothetical protein with a signal peptide                                                                                                                                                        |   |   | 1 |   | 1 | 2.365   |
| cgd7_710  | possible helicase                                                                                                                                                                                 | 1 |   |   |   | 1 | 0.400   |
| cgd7_760  | bruno-like protein with 2 RRM domains                                                                                                                                                             |   |   |   | 1 | 1 | 8.938   |
| cgd7_770  | hypothetical protein                                                                                                                                                                              | 1 |   |   |   | 1 | 0.426   |
| cgd7_790  | hypothetical protein                                                                                                                                                                              |   |   |   |   | 1 | 676.333 |

|           |                                                                                                                                                                              |   |   |  |  |   |   |         |
|-----------|------------------------------------------------------------------------------------------------------------------------------------------------------------------------------|---|---|--|--|---|---|---------|
| cgd7_800  | hypothetical protein                                                                                                                                                         |   | 1 |  |  |   | 1 | 1.935   |
| cgd7_850  | putative patched family protein                                                                                                                                              | 1 |   |  |  |   | 1 | 0.477   |
| cgd7_860  | large protein with possible conserved (animals and fungi) N-terminal and C-terminal regions                                                                                  |   |   |  |  | 1 | 1 | 17.045  |
| cgd7_870  | hypothetical protein                                                                                                                                                         | 1 |   |  |  |   | 1 | 0.324   |
| cgd7_890  | hypothetical protein                                                                                                                                                         | 1 |   |  |  |   | 1 | 0.423   |
| cgd7_920  | protein with 2 possible TPR domains, possible n-terminal acetyltransferase                                                                                                   |   |   |  |  | 1 | 1 | 2.548   |
| cgd7_970  | Syf1p. protein with 8 HAT domains                                                                                                                                            | 1 |   |  |  |   | 1 | 0.455   |
| cgd7_980  | protein with MYND plus SET domains plus 5 Ank repeats                                                                                                                        |   |   |  |  | 1 | 1 | 1.717   |
| cgd7_990  | hypothetical protein                                                                                                                                                         |   |   |  |  | 1 | 1 | 2.532   |
| cgd8_10   | uncharacterized protein                                                                                                                                                      | 1 |   |  |  |   | 1 | 0.391   |
| cgd8_100  | hypothetical protein                                                                                                                                                         | 1 |   |  |  |   | 1 | 0.306   |
| cgd8_1000 | hypothetical protein                                                                                                                                                         | 1 |   |  |  |   | 1 | 0.392   |
| cgd8_1010 | hypothetical protein                                                                                                                                                         | 1 |   |  |  |   | 1 | 0.317   |
| cgd8_1020 | hypothetical protein                                                                                                                                                         | 1 |   |  |  |   | 1 | 0.479   |
| cgd8_1040 | hypothetical protein                                                                                                                                                         | 1 |   |  |  |   | 1 | 0.426   |
| cgd8_1090 | hypothetical protein                                                                                                                                                         |   |   |  |  | 1 | 1 | 1.692   |
| cgd8_1140 | Sec14d domain containing protein                                                                                                                                             |   |   |  |  | 1 | 1 | 1.851   |
| cgd8_1180 | coronin like WD40 repeat protein                                                                                                                                             |   |   |  |  | 1 | 1 | 3.110   |
| cgd8_1190 | hypothetical protein                                                                                                                                                         |   |   |  |  | 1 | 1 | 5.818   |
| cgd8_120  | hypothetical protein                                                                                                                                                         | 1 |   |  |  |   | 1 | 0.382   |
| cgd8_1220 | uncharacterized protein with threonine repeats                                                                                                                               | 1 |   |  |  |   | 1 | 0.415   |
| cgd8_1260 | hypothetical protein                                                                                                                                                         | 1 |   |  |  |   | 1 | 0.494   |
| cgd8_1310 | hypothetical protein                                                                                                                                                         | 1 |   |  |  |   | 1 | 0.448   |
| cgd8_1360 | hypothetical protein                                                                                                                                                         |   |   |  |  | 1 | 1 | 13.676  |
| cgd8_1380 | hypothetical protein                                                                                                                                                         |   |   |  |  | 1 | 1 | 5.564   |
| cgd8_1450 | 11x WD40 repeats containing protein of plant origin                                                                                                                          |   |   |  |  | 1 | 1 | 47.471  |
| cgd8_1470 | hypothetical protein                                                                                                                                                         |   |   |  |  | 1 | 1 | 12.307  |
| cgd8_1500 | FH2 domain containing protein                                                                                                                                                |   |   |  |  | 1 | 1 | 7.457   |
| cgd8_1520 | coiled coil protein                                                                                                                                                          | 1 |   |  |  |   | 1 | 0.337   |
| cgd8_1540 | coiled coil, low complexity protein                                                                                                                                          | 1 |   |  |  |   | 1 | 0.602   |
| cgd8_1590 | uncharacterized protein                                                                                                                                                      | 1 |   |  |  |   | 1 | 0.327   |
| cgd8_1630 | hypothetical protein                                                                                                                                                         | 1 |   |  |  |   | 1 | 0.370   |
| cgd8_1680 | hypothetical protein                                                                                                                                                         |   |   |  |  | 1 | 1 | 8.481   |
| cgd8_1690 | hypothetical protein                                                                                                                                                         | 1 |   |  |  |   | 1 | 0.359   |
| cgd8_1710 | hypothetical protein                                                                                                                                                         |   |   |  |  | 1 | 1 | 13.960  |
| cgd8_1740 | predicted secrete protein, paralog within GGC gene family of secreted cryptosporidium proteins                                                                               | 1 |   |  |  |   | 1 | 0.518   |
| cgd8_1760 | secreted protein, signal peptide                                                                                                                                             |   |   |  |  | 1 | 1 | 2.679   |
| cgd8_1770 | HxYxP motif containing repeats seen only in C. elegans F29G6.3b, signal peptide                                                                                              |   |   |  |  | 1 | 1 | 121.562 |
| cgd8_1780 | hypothetical protein, signal peptide                                                                                                                                         | 1 |   |  |  |   | 1 | 0.356   |
| cgd8_180  | hypothetical protein                                                                                                                                                         |   |   |  |  | 1 | 1 | 9.192   |
| cgd8_1810 | hypothetical protein                                                                                                                                                         |   |   |  |  | 1 | 1 | 61.027  |
| cgd8_1830 | pelota/Dom34; pelota like RNA binding domain                                                                                                                                 |   |   |  |  | 1 | 1 | 1.996   |
| cgd8_1860 | LisH domain at N + WD40 repeats                                                                                                                                              |   |   |  |  | 1 | 1 | 23.827  |
| cgd8_1890 | hypothetical protein                                                                                                                                                         |   |   |  |  | 1 | 1 | 4.716   |
| cgd8_1930 | large protein with a GCN1 domain                                                                                                                                             | 1 |   |  |  |   | 1 | 0.343   |
| cgd8_1960 | hypothetical protein                                                                                                                                                         | 1 |   |  |  |   | 1 | 0.332   |
| cgd8_2040 | POZ domain protein, related to tetramerization domain of K channel                                                                                                           |   |   |  |  | 1 | 1 | 1.692   |
| cgd8_2120 | hypothetical protein                                                                                                                                                         | 1 |   |  |  |   | 1 | 0.537   |
| cgd8_2140 | hypothetical protein                                                                                                                                                         | 1 |   |  |  |   | 1 | 0.350   |
| cgd8_2150 | proliferating cell nuclear antigen PCNA                                                                                                                                      | 1 |   |  |  |   | 1 | 0.417   |
| cgd8_2160 | shares a domain with poly(ADP) ribose glycohydrolases, some protein kinase A anchoring proteins and baculovirus HzNV Orf103, possible transmembrane domain within N-terminus | 1 |   |  |  |   | 1 | 0.348   |
| cgd8_2230 | hypothetical protein                                                                                                                                                         | 1 |   |  |  |   | 1 | 0.299   |
| cgd8_2290 | hypothetical protein                                                                                                                                                         |   |   |  |  | 1 | 1 | 2.556   |
| cgd8_2300 | brahma like protein with a HSA domain, SNF2 like helicase and a bromo domain                                                                                                 |   |   |  |  | 1 | 1 | 1.468   |
| cgd8_2310 | hypothetical protein                                                                                                                                                         | 1 |   |  |  |   | 1 | 0.470   |
| cgd8_2400 | hypothetical protein                                                                                                                                                         | 1 |   |  |  |   | 1 | 0.388   |
| cgd8_2460 | hypothetical protein with possible SAP domain                                                                                                                                | 1 |   |  |  |   | 1 | 0.462   |
| cgd8_2530 | sushi-domain containing secreted protein; with a signal peptide, low complexity region followed by a sushi domain                                                            |   |   |  |  | 1 | 1 | 1.921   |
| cgd8_2570 | hypothetical protein                                                                                                                                                         | 1 |   |  |  |   | 1 | 0.352   |
| cgd8_2590 | hypothetical protein                                                                                                                                                         | 1 |   |  |  |   | 1 | 0.403   |
| cgd8_260  | hypothetical protein                                                                                                                                                         | 1 |   |  |  |   | 1 | 0.576   |
| cgd8_2600 | hypothetical protein                                                                                                                                                         | 1 |   |  |  |   | 1 | 0.362   |
| cgd8_2620 | hypothetical protein                                                                                                                                                         |   |   |  |  | 1 | 1 | 1.871   |
| cgd8_2660 | hypothetical protein                                                                                                                                                         |   |   |  |  | 1 | 1 | 13.192  |
| cgd8_2680 | hypothetical secreted protein, signal peptide                                                                                                                                | 1 |   |  |  |   | 1 | 0.551   |
| cgd8_2690 | hypothetical protein                                                                                                                                                         |   |   |  |  | 1 | 1 | 1.860   |
| cgd8_2740 | hypothetical protein                                                                                                                                                         | 1 |   |  |  |   | 1 | 0.359   |
| cgd8_2750 | hypothetical protein                                                                                                                                                         |   |   |  |  | 1 | 1 | 2.487   |
| cgd8_2830 | LRR repeats protein                                                                                                                                                          | 1 |   |  |  |   | 1 | 0.511   |

|           |                                                                                                                         |   |   |   |   |   |         |
|-----------|-------------------------------------------------------------------------------------------------------------------------|---|---|---|---|---|---------|
| cgd8_2980 | hypothetical protein                                                                                                    |   | 1 |   |   | 1 | 1.514   |
| cgd8_30   | signal peptide, predicted secreted protein of cryptosporidium-specific SKSR gene family                                 |   |   | 1 |   | 1 | 3.067   |
| cgd8_3010 | Smc ABC ATPase                                                                                                          | 1 |   |   |   | 1 | 0.424   |
| cgd8_3020 | hypothetical protein                                                                                                    | 1 |   |   |   | 1 | 0.388   |
| cgd8_3030 | hypothetical protein, signal peptide, secreted protein                                                                  | 1 |   |   |   | 1 | 0.529   |
| cgd8_3050 | hypothetical protein                                                                                                    |   |   |   | 1 | 1 | 21.755  |
| cgd8_3080 | Swr1p like SWI/SNF2 family ATPase with a HSA domain at the N-terminus probably involved in chromatin remodelling        | 1 |   |   |   | 1 | 0.427   |
| cgd8_310  | hypothetical protein                                                                                                    |   | 1 |   |   | 1 | 1.760   |
| cgd8_3110 | 12x WD40 repeat containing protein                                                                                      |   |   |   | 1 | 1 | 123.457 |
| cgd8_3160 | hypothetical protein                                                                                                    |   |   | 1 |   | 1 | 5.056   |
| cgd8_3170 | hypothetical protein                                                                                                    | 1 |   |   |   | 1 | 0.438   |
| cgd8_320  | hypothetical protein                                                                                                    | 1 | 1 |   |   | 2 | 1.092   |
| cgd8_330  | hypothetical protein                                                                                                    | 1 |   | 1 |   | 2 | 1.696   |
| cgd8_3410 | hypothetical protein                                                                                                    | 1 |   |   |   | 1 | 0.469   |
| cgd8_3490 | hypothetical protein                                                                                                    |   |   |   | 1 | 1 | 9.775   |
| cgd8_3500 | hypothetical protein                                                                                                    |   |   | 1 |   | 1 | 4.821   |
| cgd8_3530 | predicted secreted protein                                                                                              |   |   |   | 1 | 1 | 16.731  |
| cgd8_3540 | predicted secreted protein                                                                                              |   |   |   | 1 | 1 | 54.426  |
| cgd8_3550 | hypothetical protein                                                                                                    |   |   | 1 |   | 1 | 2.390   |
| cgd8_3560 | predicted secreted protein                                                                                              |   |   |   | 1 | 1 | 6.427   |
| cgd8_3570 | predicted secreted protein                                                                                              |   |   | 1 |   | 1 | 4.477   |
| cgd8_3580 | hypothetical protein, signal peptide, paralogs                                                                          |   |   |   | 1 | 1 | 9.708   |
| cgd8_3590 | predicted secreted protein                                                                                              |   |   |   | 1 | 1 | 12.880  |
| cgd8_3650 | predicted DM-LD37668p                                                                                                   |   |   | 1 |   | 1 | 4.149   |
| cgd8_3700 | hypothetical protein                                                                                                    |   |   |   | 1 | 1 | 6.749   |
| cgd8_3710 | hypothetical protein                                                                                                    |   |   |   | 1 | 1 | 8.772   |
| cgd8_3720 | D441/Mpe1p like protein with a zinc knuckle (C2HC) and Phd Zn finger domain                                             |   |   |   | 1 | 1 | 35.163  |
| cgd8_3750 | predicted secreted protein                                                                                              |   |   |   | 1 | 1 | 343.094 |
| cgd8_3780 | hypothetical protein                                                                                                    | 1 |   |   |   | 1 | 0.541   |
| cgd8_3790 | Sec14'Sec14'                                                                                                            | 1 |   |   |   | 1 | 0.523   |
| cgd8_3800 | hypothetical protein                                                                                                    |   |   |   | 1 | 1 | 94.614  |
| cgd8_3810 | hypothetical protein                                                                                                    |   |   |   | 1 | 1 | 15.164  |
| cgd8_3830 | hypothetical protein                                                                                                    |   |   |   | 1 | 1 | 18.637  |
| cgd8_3840 | hypothetical protein                                                                                                    |   | 1 |   |   | 1 | 1.306   |
| cgd8_390  | hypothetical protein                                                                                                    |   |   | 1 |   | 1 | 2.521   |
| cgd8_3930 | LepA like TRAFAC class GTPase, 2 transmembrane domain near C                                                            | 1 |   |   |   | 1 | 0.438   |
| cgd8_3960 | RIKEN cDNA 9430077D24 gene, putative                                                                                    | 1 |   |   |   | 1 | 0.339   |
| cgd8_3980 | hypothetical protein                                                                                                    | 1 |   |   |   | 1 | 0.395   |
| cgd8_4020 | hypothetical protein                                                                                                    |   | 1 |   |   | 1 | 1.597   |
| cgd8_4070 | SANT domain containing protein                                                                                          | 1 |   |   |   | 1 | 0.337   |
| cgd8_4080 | WD-repeat protein                                                                                                       | 1 |   |   |   | 1 | 0.421   |
| cgd8_410  | possible secreted protein with long stretch of threonines, putative mucin                                               |   |   |   | 1 | 1 | 39.095  |
| cgd8_4110 | hypothetical protein                                                                                                    | 1 |   |   |   | 1 | 0.519   |
| cgd8_4190 | uncharacterized glycine-rich low complexity protein                                                                     | 1 |   |   |   | 1 | 0.313   |
| cgd8_420  | Low complexity coiled coil protein                                                                                      | 1 |   |   |   | 1 | 0.473   |
| cgd8_4200 | uncharacterized protein with several coiled-coil regions                                                                |   |   |   | 1 | 1 | 8.164   |
| cgd8_4280 | zz domain protein                                                                                                       |   |   |   | 1 | 1 | 7.415   |
| cgd8_4300 | hypothetical protein                                                                                                    |   | 1 |   |   | 1 | 1.468   |
| cgd8_4310 | hypothetical protein                                                                                                    |   | 1 |   |   | 1 | 2.230   |
| cgd8_4380 | SNW family nuclear protein                                                                                              |   |   | 1 |   | 1 | 5.523   |
| cgd8_4390 | hypothetical protein                                                                                                    |   |   | 1 |   | 1 | 3.044   |
| cgd8_4420 | WD40 repeat and RING finger domain-containing protein                                                                   |   |   |   | 1 | 1 | 19.626  |
| cgd8_4450 | hypothetical protein                                                                                                    |   | 1 |   |   | 1 | 1.924   |
| cgd8_4470 | hypothetical protein                                                                                                    | 1 |   |   |   | 1 | 0.583   |
| cgd8_4510 | hypothetical protein                                                                                                    |   |   |   | 1 | 1 | 11.685  |
| cgd8_4520 | large protein with possible domain of nucleoporin, Non-repetitive/WGA-negative nucleoporin                              |   | 1 |   |   | 1 | 2.142   |
| cgd8_4540 | predicted coiled coil protein                                                                                           |   | 1 |   |   | 1 | 1.668   |
| cgd8_4590 | hypothetical protein                                                                                                    | 1 |   |   |   | 1 | 0.327   |
| cgd8_4600 | hypothetical protein                                                                                                    | 1 |   |   |   | 1 | 0.430   |
| cgd8_4610 | hypothetical protein                                                                                                    | 1 |   |   |   | 1 | 0.405   |
| cgd8_4620 | ISWI related chromatinic protein with an apicomplexan specific domain architecture composed of 3x PHD+SNF2 ATPase+2xPHD |   |   |   | 1 | 1 | 48.753  |
| cgd8_4640 | WD40 repeat                                                                                                             |   |   |   | 1 | 1 | 18.713  |
| cgd8_4660 | hypothetical protein, signal peptide                                                                                    |   | 1 |   |   | 1 | 1.447   |
| cgd8_470  | MRG/Alp3 like proteini with a chromodomain and an MRG domain                                                            | 1 |   |   |   | 1 | 0.316   |
| cgd8_4700 | hypothetical protein                                                                                                    | 1 |   |   |   | 1 | 0.307   |
| cgd8_4710 | hypothetical protein                                                                                                    |   |   |   | 1 | 1 | 71.536  |
| cgd8_4770 | hypothetical protein                                                                                                    | 1 |   |   |   | 1 | 0.500   |
| cgd8_4780 | large protein with possible central conserved domain                                                                    | 1 |   |   |   | 1 | 0.442   |



|                      |               |                                                                                                    |     |     |     |     |     |      |        |
|----------------------|---------------|----------------------------------------------------------------------------------------------------|-----|-----|-----|-----|-----|------|--------|
|                      | cgd8_4800     | SSM4 like ring finger with a forkhead associated (FHA) domain (apicomplexan-specific architecture) |     | 1   |     |     |     | 1    | 1.933  |
|                      | cgd8_4820     | hypothetical protein                                                                               | 1   |     |     |     |     | 1    | 0.375  |
|                      | cgd8_4840     | large protein with 2 MYB domains plus low complexity; GA repeat and Q repeat at the C-terminus     |     |     | 1   |     |     | 1    | 5.452  |
|                      | cgd8_490      | uncharacterized large low complexity coiled coil protein                                           | 1   |     |     |     |     | 1    | 0.372  |
|                      | cgd8_4920     | WD repeats containing protein                                                                      | 1   |     |     |     |     | 1    | 0.288  |
|                      | cgd8_4960     | hypothetical protein, signal peptide                                                               |     |     |     |     | 1   | 1    | 9.100  |
|                      | cgd8_4980     | hypothetical protein                                                                               | 1   |     |     |     |     | 1    | 0.483  |
|                      | cgd8_50       | signal peptide, predicted secreted protein of cryptosporidium-specific FGLN gene family            |     |     | 1   |     |     | 1    | 4.918  |
|                      | cgd8_5010     | hypothetical protein                                                                               |     |     |     |     | 1   | 1    | 19.586 |
|                      | cgd8_5020     | starch binding domain containing protein, possible plant origin                                    | 1   |     |     |     |     | 1    | 0.409  |
|                      | cgd8_5040     | hypothetical protein                                                                               | 1   |     |     |     |     | 1    | 0.299  |
|                      | cgd8_5070     | hypothetical protein                                                                               | 1   |     |     |     |     | 1    | 0.467  |
|                      | cgd8_5100     | hypothetical protein                                                                               |     |     | 1   |     |     | 1    | 2.796  |
|                      | cgd8_5110     | hypothetical protein                                                                               |     |     |     |     | 1   | 1    | 6.575  |
|                      | cgd8_5170     | hypothetical protein                                                                               | 1   |     |     |     |     | 1    | 0.289  |
|                      | cgd8_5180     | hypothetical protein                                                                               | 1   |     |     |     |     | 1    | 0.444  |
|                      | cgd8_5190     | large protein with central conserved domain, possible BCRT domain                                  | 1   |     |     |     |     | 1    | 0.443  |
|                      | cgd8_5250     | protein with 2x PHD domains                                                                        | 1   |     |     |     |     | 1    | 0.346  |
|                      | cgd8_5290     | large protein with possible signal peptide and acidic plus glycine repeats                         |     |     | 1   |     |     | 1    | 2.282  |
|                      | cgd8_5300     | signal peptide containing protein                                                                  |     |     | 1   |     |     | 1    | 5.676  |
|                      | cgd8_5310     | signal peptide containing protein                                                                  |     | 1   |     |     |     | 1    | 1.431  |
|                      | cgd8_5330     | hypothetical protein                                                                               |     |     |     |     | 1   | 1    | 24.100 |
|                      | cgd8_5340     | coiled coil protein                                                                                |     |     |     |     | 1   | 1    | 71.171 |
|                      | cgd8_550      | large uncharacterized protein                                                                      | 1   |     |     |     |     | 1    | 0.438  |
|                      | cgd8_620      | hypothetical protein                                                                               | 1   |     |     |     |     | 1    | 0.398  |
|                      | cgd8_660      | large low complexity protein                                                                       | 1   |     |     |     |     | 1    | 0.494  |
|                      | cgd8_700      | predicted secreted protein, signal peptide with several threonines, possible mucin                 | 1   |     |     |     |     | 1    | 0.457  |
|                      | cgd8_720      | hypothetical protein                                                                               | 1   |     |     |     |     | 1    | 0.281  |
|                      | cgd8_740      | prefoldin like molecular chaperone                                                                 | 1   |     |     |     |     | 1    | 0.337  |
|                      | cgd8_760      | predicted secreted protein, 1 or more transmembrane domain, signal peptide                         | 1   |     |     |     |     | 1    | 0.512  |
|                      | cgd8_770      | hypothetical protein                                                                               | 1   |     |     |     |     | 1    | 0.384  |
|                      | cgd8_830      | hypothetical protein                                                                               | 1   |     |     |     |     | 1    | 0.487  |
|                      | cgd8_970      | VPS13 like protein involved in vacuolar protein trafficking                                        | 1   |     |     |     |     | 1    | 0.438  |
|                      | Unknown Total |                                                                                                    | 612 | 211 | 196 | 185 | 148 | 1352 | 16.705 |
| <b>Unknown Total</b> |               |                                                                                                    | 801 | 293 | 272 | 267 | 216 | 1849 | 20.490 |
| <b>Grand Total</b>   |               |                                                                                                    | ### | 481 | 481 | 481 | 481 | 3137 | 26.292 |
