# Supplementary material for: Transcriptome analysis reveals unique metabolic features in the Cryptosporidium parvum Oocysts associated with environmental survival and stresses
Source: PubMed Central journal article supplement (PMC3542205; doi:10.1186/1471-2164-13-647), 2012-11-21

**Figure S2.**

Comparison of data derived from Mauzy et al (2012) and the present qRT-PCR study on the relative levels of *Cryptosporidium parvum* LDH, ADH and AceCL genes in the intracellular developmental stages. Data from Mauzy et al were extracted from the CryptoDB databases (<http://www.CryptoDB.org>).

**A** (Data derived from Mauzy et al, 2012. PLoS ONE 7:e31715)

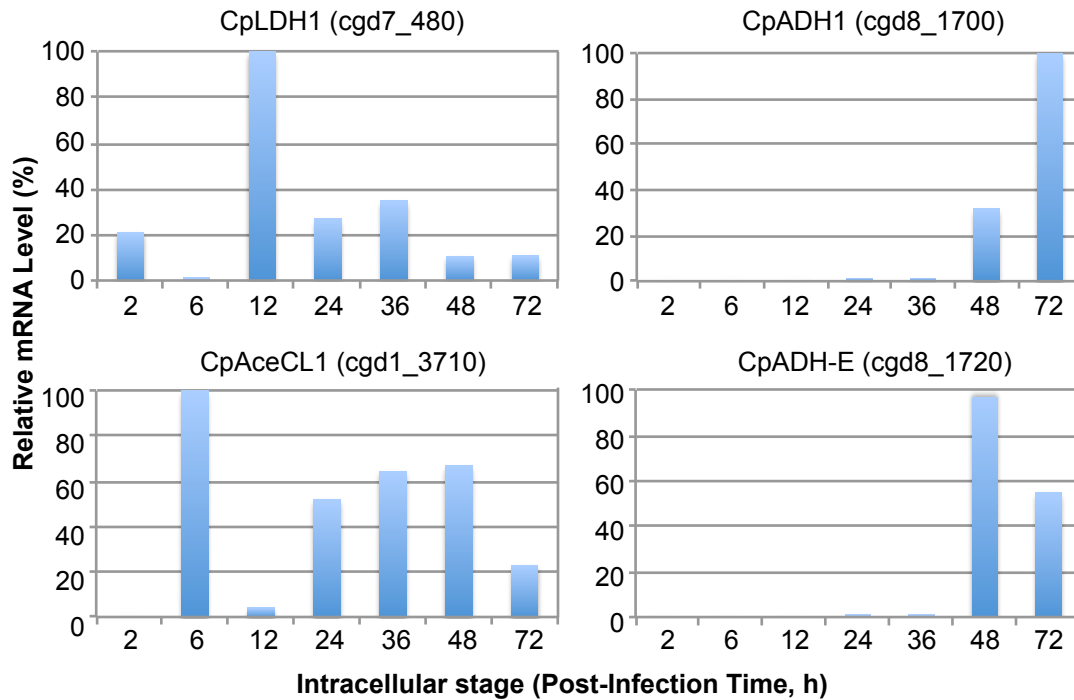

**B** (Data derived from this study, i.e., Figure 6B)

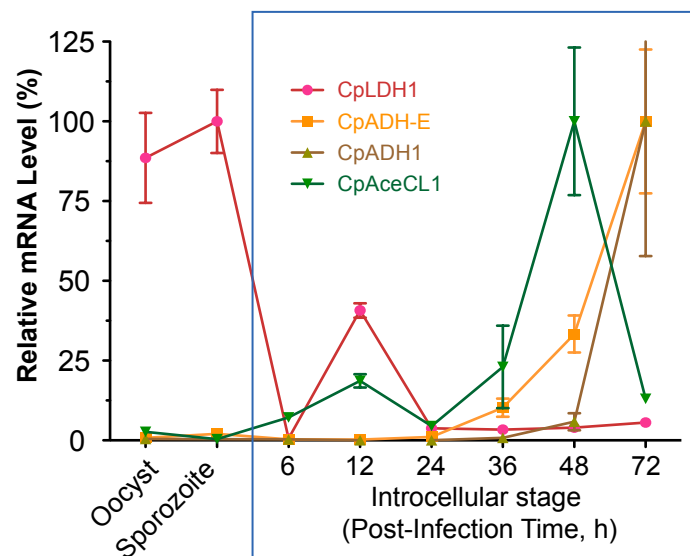

Supplement: 1471-2164-13-647-S3.pdf [file 1471-2164-13-647-S3.pdf]
