# Supplementary material for: Transcriptome analysis reveals unique metabolic features in the Cryptosporidium parvum Oocysts associated with environmental survival and stresses
Source: PubMed Central journal article supplement (PMC3542205; doi:10.1186/1471-2164-13-647), 2012-11-21
Supplement: 1471-2164-13-647-S4.pdf [file 1471-2164-13-647-S4.pdf]

**Table S2A:** Functional clarification of top 100 genes in *Toxoplasma gondii* with the highest levels of expression in the oocysts sporulated for 10 days

| <b>Functional group</b>                 | <b>Gene count</b> |
|-----------------------------------------|-------------------|
| <b>Antigen and/or secretory protein</b> | 18                |
| beta antigen (1)                        |                   |
| GRA (6)                                 |                   |
| MIC (7)                                 |                   |
| SRS (4)                                 |                   |
| <b>Enzyme</b>                           | 10                |
| AA synthesis (1)                        |                   |
| energy (2)                              |                   |
| glycosylases (1)                        |                   |
| protein modification (3)                |                   |
| undefined (3)                           |                   |
| <b>Chromatin (Histone)</b>              | 3                 |
| <b>Cytoskeletal</b>                     | 3                 |
| <b>Redox homeostasis</b>                | 3                 |
| <b>Ribosomal proteins</b>               | 3                 |
| <b>Chaperonin (HSP)</b>                 | 2                 |
| <b>Gene expression (TIF)</b>            | 2                 |
| <b>Protein degradation (ubiquitin)</b>  | 2                 |
| <b>Calcium-binding (CaM)</b>            | 1                 |
| <b>Structure (COWP)</b>                 | 1                 |
| <b>Hypothetical</b>                     | 52                |
| <b>Grand Total</b>                      | 100               |

**Figure S2B.** List of the top 100 highly expressed genes in the *Toxoplasma gondii* oocysts sporulated for 10 days. Original data were generated by Fritz et al. (2012) and extracted from <http://www.ToxoDB.org>.

| Rank | Gene ID       | Level (d10 oocysts) | Product Description                                     | Functional group    | Subgroup             |
|------|---------------|---------------------|---------------------------------------------------------|---------------------|----------------------|
| 1    | TGME49_081590 | 13.7009755          | hypothetical protein                                    | hypothetical        | hypothetical         |
| 2    | TGME49_070250 | 13.616716           | dense granule protein 1 / major antigenp24              | antigen             | GRA                  |
| 3    | TGME49_037080 | 13.3381775          | hypothetical protein                                    | hypothetical        | hypothetical         |
| 4    | TGME49_093690 | 13.2964225          | profilin family protein                                 | cytoskeletal        | profilin             |
| 5    | TGME49_120530 | 13.1842575          | hypothetical protein                                    | hypothetical        | hypothetical         |
| 6    | TGME49_086450 | 13.181792           | dense granule protein 5 precursor                       | antigen             | GRA                  |
| 7    | TGME49_050710 | 13.149738           | microneme protein 10                                    | antigen             | MIC                  |
| 8    | TGME49_002100 | 13.106612           | hypothetical protein                                    | hypothetical        | hypothetical         |
| 9    | TGME49_058550 | 13.0106595          | SRS28 (= SporoSAG)                                      | antigen             | SRS                  |
| 10   | TGME49_076850 | 12.9646045          | late embryogenesis abundant domain-containing protein   | hypothetical        | hypothetical         |
| 11   | TGME49_014220 | 12.9475755          | hypothetical protein                                    | hypothetical        | hypothetical         |
| 12   | TGME49_020400 | 12.908191           | actin depolymerizing factor                             | cytoskeletal        | actin                |
| 13   | TGME49_059900 | 12.903928           | hypothetical protein, conserved                         | hypothetical        | hypothetical         |
| 14   | TGME49_002110 | 12.854348           | hypothetical protein                                    | hypothetical        | hypothetical         |
| 15   | TGME49_119890 | 12.849931           | hypothetical protein                                    | hypothetical        | hypothetical         |
| 16   | TGME49_094600 | 12.7870565          | hypothetical protein                                    | hypothetical        | hypothetical         |
| 17   | TGME49_120540 | 12.760554           | hypothetical protein                                    | hypothetical        | hypothetical         |
| 18   | TGME49_013280 | 12.7605255          | hypothetical protein                                    | hypothetical        | hypothetical         |
| 19   | TGME49_003310 | 12.749144           | dense granule protein 7                                 | antigen             | GRA                  |
| 20   | TGME49_027100 | 12.748301           | glutaredoxin, putative                                  | Redox homeostasis   | redoxin              |
| 21   | TGME49_116190 | 12.738828           | superoxide dismutase, putative                          | Redox homeostasis   | SOD                  |
| 22   | TGME49_076880 | 12.6711495          | late embryogenesis abundant domain-containing protein   | hypothetical        | hypothetical         |
| 23   | TGME49_108840 | 12.6364755          | SRS51 (= SRS3)                                          | antigen             | SRS                  |
| 24   | TGME49_004520 | 12.586474           | hypothetical protein                                    | hypothetical        | hypothetical         |
| 25   | TGME49_087250 | 12.5827725          | hypothetical protein                                    | hypothetical        | hypothetical         |
| 26   | TGME49_008450 | 12.546591           | serine proteinase inhibitor, putative                   | enzyme              | protein modification |
| 27   | TGME49_003720 | 12.5409265          | vitamin K epoxide reductase complex subunit 1, putative | enzyme              | unknown              |
| 28   | TGME49_106270 | 12.4310705          | hypothetical protein                                    | hypothetical        | hypothetical         |
| 29   | TGME49_000360 | 12.430844           | hypothetical protein                                    | hypothetical        | hypothetical         |
| 30   | TGME49_108020 | 12.3837425          | SRS57 (= SAG3, P43)                                     | antigen             | SRS                  |
| 31   | TGME49_004530 | 12.36251            | microneme protein MIC11                                 | antigen             | MIC                  |
| 32   | TGME49_119560 | 12.3558365          | microneme protein MIC3                                  | antigen             | MIC                  |
| 33   | TGME49_066860 | 12.3482205          | BTB/POZ domain-containing protein                       | hypothetical        | hypothetical         |
| 34   | TGME49_088650 | 12.3452855          | hypothetical protein                                    | hypothetical        | hypothetical         |
| 35   | TGME49_070950 | 12.3446345          | hypothetical protein                                    | hypothetical        | hypothetical         |
| 36   | TGME49_019820 | 12.3179475          | polyubiquitin, putative                                 | protein degradation | ubiquitin            |
| 37   | TGME49_053820 | 12.2409775          | hypothetical protein, conserved                         | hypothetical        | hypothetical         |
| 38   | TGME49_067470 | 12.209846           | hypothetical protein                                    | hypothetical        | hypothetical         |
| 39   | TGME49_009610 | 12.1808045          | oocyst wall protein COWP, putative                      | structure           | COWP                 |
| 40   | TGME49_049370 | 12.1675755          | translation initiation factor SUI1, putative            | gene expression     | TIF                  |
| 41   | TGME49_058470 | 12.136311           | hypothetical protein                                    | hypothetical        | hypothetical         |
| 42   | TGME49_089690 | 12.115494           | glyceraldehyde-3-phosphate dehydrogenase                | enzyme              | energy               |
| 43   | TGME49_093740 | 12.020502           | hypothetical protein                                    | hypothetical        | hypothetical         |
| 44   | TGME49_009910 | 11.995331           | histone H2B variant 1                                   | chromatin           | histone              |
| 45   | TGME49_039740 | 11.968661           | hypothetical protein                                    | hypothetical        | hypothetical         |
| 46   | TGME49_057380 | 11.9351895          | hypothetical protein                                    | hypothetical        | hypothetical         |
| 47   | TGME49_053690 | 11.8690545          | hypothetical protein                                    | hypothetical        | hypothetical         |
| 48   | TGME49_017890 | 11.8021             | peroxiredoxin                                           | Redox homeostasis   | redoxin              |
| 49   | TGME49_071930 | 11.798724           | hypothetical protein, conserved                         | hypothetical        | hypothetical         |
| 50   | TGME49_060190 | 11.7461065          | microneme protein, putative                             | antigen             | MIC                  |

|     |               |                                                                           |                     |                      |
|-----|---------------|---------------------------------------------------------------------------|---------------------|----------------------|
| 51  | TGME49_049240 | 11.70397 calmodulin                                                       | Calcium-binding     | CaM                  |
| 52  | TGME49_075810 | 11.66303 ribosomal protein S10, putative                                  | ribosome biogenesis | ribosomal protein    |
| 53  | TGME49_080430 | 11.65981 hypothetical protein                                             | hypothetical        | hypothetical         |
| 54  | TGME49_071490 | 11.649778 hypothetical protein                                            | hypothetical        | hypothetical         |
| 55  | TGME49_086090 | 11.6027615 translation initiation factor SUI1, putative                   | gene expression     | TIF                  |
| 56  | TGME49_091890 | 11.596418 microneme protein MIC1                                          | antigen             | MIC                  |
| 57  | TGME49_032940 | 11.5887815 small heat shock protein 20                                    | Chaperonin          | HSP                  |
| 58  | TGME49_115260 | 11.5792415 alanine dehydrogenase, putative                                | enzyme              | AA synthesis         |
| 59  | TGME49_076860 | 11.5683955 late embryogenesis abundant domain-containing protein          | hypothetical        | hypothetical         |
| 60  | TGME49_112940 | 11.5603165 hypothetical protein                                           | hypothetical        | hypothetical         |
| 61  | TGME49_031080 | 11.5151295 hypothetical protein                                           | hypothetical        | hypothetical         |
| 62  | TGME49_005090 | 11.497294 hypothetical protein                                            | hypothetical        | hypothetical         |
| 63  | TGME49_027620 | 11.496448 28 kDa antigen                                                  | antigen             | GRA                  |
| 64  | TGME49_055660 | 11.487851 hypothetical protein                                            | hypothetical        | hypothetical         |
| 65  | TGME49_066460 | 11.473115 ubiquitin-like protein SMT3 precursor, putative                 | protein degradation | ubiquitin            |
| 66  | TGME49_018260 | 11.471261 histone H3.3 variant                                            | chromatin           | Histone              |
| 67  | TGME49_002090 | 11.449114 hypothetical protein                                            | hypothetical        | hypothetical         |
| 68  | TGME49_059630 | 11.41997 hypothetical protein, conserved                                  | hypothetical        | hypothetical         |
| 69  | TGME49_032410 | 11.4188375 hypothetical protein                                           | hypothetical        | hypothetical         |
| 70  | TGME49_014940 | 11.410756 MIC2-associated protein M2AP                                    | antigen             | MIC                  |
| 71  | TGME49_089600 | 11.4105075 Hsp20/alpha crystallin domain-containing protein               | Chaperonin          | HSP                  |
| 72  | TGME49_013940 | 11.3763095 CHCH domain-containing protein                                 | hypothetical        | hypothetical         |
| 73  | TGME49_077080 | 11.3529265 microneme TgMIC5 protein                                       | antigen             | MIC                  |
| 74  | TGME49_072240 | 11.345837 hypothetical protein                                            | hypothetical        | hypothetical         |
| 75  | TGME49_062470 | 11.3437315 beta antigen, putative                                         | antigen             | beta antigen         |
| 76  | TGME49_109810 | 11.331183 60S acidic ribosomal protein P2, putative                       | ribosome biogenesis | ribosomal protein    |
| 77  | TGME49_001860 | 11.283525 hypothetical protein                                            | hypothetical        | hypothetical         |
| 78  | TGME49_029320 | 11.2675365 haloacid dehalogenase-like hydrolase domain-containing protein | enzyme              | unknown              |
| 79  | TGME49_029330 | 11.2512265 haloacid dehalogenase-like hydrolase domain containing protein | enzyme              | unknown              |
| 80  | TGME49_034550 | 11.2503755 60S ribosomal protein L29, putative                            | ribosome biogenesis | ribosomal protein    |
| 81  | TGME49_036040 | 11.218365 fructose-1,6-bisphosphate aldolase                              | enzyme              | energy               |
| 82  | TGME49_046130 | 11.1989775 serine protease inhibitor, putative                            | enzyme              | protein modification |
| 83  | TGME49_033460 | 11.163425 SRS29B (= SAG1, P30)                                            | antigen             | SRS                  |
| 84  | TGME49_024130 | 11.1455005 hypothetical protein                                           | hypothetical        | hypothetical         |
| 85  | TGME49_013850 | 11.137022 hypothetical protein                                            | hypothetical        | hypothetical         |
| 86  | TGME49_080380 | 11.1196235 non-transmembrane antigen                                      | enzyme              | Glycosylases         |
| 87  | TGME49_026020 | 11.113592 transmembrane domain-containing protein                         | hypothetical        | hypothetical         |
| 88  | TGME49_026500 | 11.1130655 hypothetical protein                                           | hypothetical        | hypothetical         |
| 89  | TGME49_046550 | 11.094218 eukaryotic aspartyl protease, putative                          | enzyme              | protein modification |
| 90  | TGME49_016180 | 11.0912385 hypothetical protein                                           | hypothetical        | hypothetical         |
| 91  | TGME49_054800 | 11.0320385 hypothetical protein                                           | hypothetical        | hypothetical         |
| 92  | TGME49_116400 | 11.0203125 tubulin alpha chain                                            | cytoskeletal        | tubulin              |
| 93  | TGME49_039260 | 11.020137 histone H4, putative                                            | chromatin           | histone              |
| 94  | TGME49_075440 | 11.0162525 granule antigen protein GRA6                                   | antigen             | GRA                  |
| 95  | TGME49_048990 | 10.971121 hypothetical protein                                            | hypothetical        | hypothetical         |
| 96  | TGME49_092350 | 10.970051 hypothetical protein                                            | hypothetical        | hypothetical         |
| 97  | TGME49_055380 | 10.9643055 hypothetical protein                                           | hypothetical        | hypothetical         |
| 98  | TGME49_116710 | 10.9216445 hypothetical protein                                           | hypothetical        | hypothetical         |
| 99  | TGME49_054720 | 10.9094295 dense granule protein GRA8                                     | antigen             | GRA                  |
| 100 | TGME49_058410 | 10.895404 hypothetical protein                                            | hypothetical        | hypothetical         |
