# Supplementary material for: Transcriptome analysis reveals unique metabolic features in the Cryptosporidium parvum Oocysts associated with environmental survival and stresses
Source: PubMed Central journal article supplement (PMC3542205; doi:10.1186/1471-2164-13-647), 2012-11-21

**Figure S3.**

Relative levels of the two *Toxoplasma gondii* LDH genes in oocysts, tachyzoites and bradyzoites. Data were extracted from the ToxoDB databases (<http://www.ToxoDB.org>).

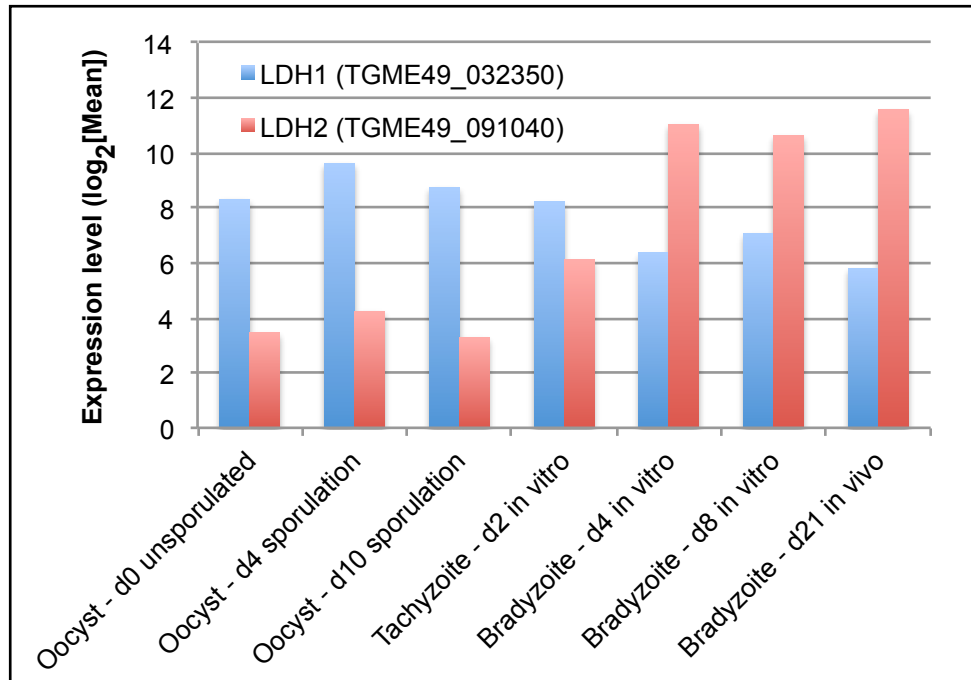

Supplement: 1471-2164-13-647-S5.pdf [file 1471-2164-13-647-S5.pdf]
