# Supplementary material for: Transcriptome analysis reveals unique metabolic features in the Cryptosporidium parvum Oocysts associated with environmental survival and stresses
Source: PubMed Central journal article supplement (PMC3542205; doi:10.1186/1471-2164-13-647), 2012-11-21
Supplement: 1471-2164-13-647-S6.pdf [file 1471-2164-13-647-S6.pdf]

**Table S3. Complete list of significantly regulated genes in the oocysts upon UV irradiation and recovered for 0.5 h and 5 h**

| <b>Cluster 1</b>                                                                   |           |                     |                   |                                                                               |
|------------------------------------------------------------------------------------|-----------|---------------------|-------------------|-------------------------------------------------------------------------------|
| <b>0.5 h: Up-regulated (Ratio &gt; 1.2) vs. 5 h: Up-regulated (Ratio &gt; 1.2)</b> |           |                     |                   |                                                                               |
| No.                                                                                | GeneID    | Fold Change (0.5 h) | Fold change (5 h) | Gene Description                                                              |
| 1                                                                                  | cgd3_1410 | 2.192               | 1.287             | small hypothetical protein                                                    |
| 2                                                                                  | cgd4_3850 | 1.694               | 1.222             | putative t-complex protein 1, gamma subunit                                   |
| 3                                                                                  | cgd7_1790 | 1.578               | 1.240             | protein with BRIGHT domain like HTH domain at N-terminus                      |
| 4                                                                                  | cgd2_1290 | 1.521               | 1.238             | hypothetical protein, signal peptide, transmembrane domain near C-terminus    |
| 5                                                                                  | cgd1_2880 | 1.467               | 1.340             | 13 kda membrane protein subunit                                               |
| 6                                                                                  | cgd7_1610 | 1.434               | 1.362             | uncharacterized low complexity protein                                        |
| 7                                                                                  | cgd5_3380 | 1.402               | 1.253             | protein with signal peptide and possible kazal domain                         |
| 8                                                                                  | cgd5_2590 | 1.392               | 1.322             | Alg5 like dolichyl-phosphate beta-glucosyltransferase                         |
| 9                                                                                  | cgd5_2530 | 1.387               | 1.225             | protein with 12 transmembrane domains, possible apicomplexan-specific protein |
| 10                                                                                 | cgd1_1140 | 1.387               | 1.331             | conserved hypothetical protein                                                |
| 11                                                                                 | cgd2_3490 | 1.380               | 1.204             | protein with low complexity regions and an apicomplexan specific domain       |
| 12                                                                                 | cgd6_5230 | 1.366               | 1.229             | hypothetical protein                                                          |
| 13                                                                                 | cgd5_3090 | 1.352               | 1.210             | N-acetyltransferase subunit ARD1                                              |
| 14                                                                                 | cgd2_1010 | 1.350               | 1.215             | conserved hypothetical protein                                                |
| 15                                                                                 | cgd2_3560 | 1.322               | 1.525             | hypothetical protein with 8 transmembrane domains                             |
| 16                                                                                 | cgd7_2030 | 1.319               | 1.243             | bacterial-like Sir2 family protein                                            |
| 17                                                                                 | cgd4_4360 | 1.281               | 1.270             | ring finger domain containing protein                                         |
| 18                                                                                 | cgd1_2340 | 1.274               | 1.267             | hypothetical protein                                                          |
| 19                                                                                 | cgd8_1240 | 1.265               | 1.521             | DNA polymerase epsilon catalytic subunit                                      |
| 20                                                                                 | cgd2_1250 | 1.261               | 1.357             | DNA replication licensing factor MCM4 like AAA+ ATPase                        |
| 21                                                                                 | cgd6_3370 | 1.260               | 1.227             | microtubule-associated protein                                                |
| 22                                                                                 | cgd2_1590 | 1.257               | 1.322             | extracellular protein with signal peptide, 5xEGF and apple domains            |
| 23                                                                                 | cgd2_1110 | 1.245               | 1.414             | silencer-associated factor, putative                                          |
| 24                                                                                 | cgd7_3420 | 1.237               | 1.745             | hypothetical protein                                                          |
| 25                                                                                 | cgd6_5500 | 1.222               | 1.236             | hypothetical protein                                                          |
| 26                                                                                 | cgd2_960  | 1.221               | 1.235             | hypothetical protein                                                          |
| 27                                                                                 | cgd1_3660 | 1.214               | 1.201             | hypothetical protein                                                          |
| 28                                                                                 | cgd6_4280 | 1.210               | 1.247             | hypothetical protein having a signal peptide                                  |
| 29                                                                                 | cgd3_3480 | 1.208               | 1.393             | large Sec7 domain containing protein                                          |
| 30                                                                                 | cgd7_1980 | 1.207               | 1.327             | gamma tubulin                                                                 |
| 31                                                                                 | cgd6_4740 | 1.204               | 1.215             | hypothetical protein with 6 transmembrane domains and signal peptide          |

| <b>Cluster 2</b>                                                              |           |                      |                    |                                                                                                                  |
|-------------------------------------------------------------------------------|-----------|----------------------|--------------------|------------------------------------------------------------------------------------------------------------------|
| <b>0.5 h: Up-regulated (Ratio &gt; 1.2) vs. 5 h: Normal (Ratio = 0.8-1.2)</b> |           |                      |                    |                                                                                                                  |
| No.                                                                           | GeneID    | Signal Ratio (0.5 h) | Signal Ratio (5 h) | Description                                                                                                      |
| 1                                                                             | cgd8_5030 | 2.479                | 1.169              | articulin family protein, Pfs77 protein-related                                                                  |
| 2                                                                             | cgd7_3840 | 2.432                | 1.079              | conserved hypothetical protein                                                                                   |
| 3                                                                             | cgd3_2070 | 2.119                | 1.068              | hypothetical protein                                                                                             |
| 4                                                                             | cgd7_990  | 2.003                | 1.074              | hypothetical protein                                                                                             |
| 5                                                                             | cgd1_840  | 1.985                | 1.032              | conserved hypothetical protein                                                                                   |
| 6                                                                             | cgd8_3510 | 1.861                | 0.987              | thioredoxin-like protein, fragment                                                                               |
| 7                                                                             | cgd7_270  | 1.860                | 1.111              | conserved hypothetical protein                                                                                   |
| 8                                                                             | cgd3_3320 | 1.845                | 1.142              | putative phenylalanyl-tRNA synthetase                                                                            |
| 9                                                                             | cgd3_270  | 1.808                | 1.068              | hypothetical protein                                                                                             |
| 10                                                                            | cgd4_4030 | 1.808                | 1.089              | hypothetical protein                                                                                             |
| 11                                                                            | cgd7_4710 | 1.786                | 1.127              | conserved hypothetical protein                                                                                   |
| 12                                                                            | cgd3_220  | 1.782                | 1.074              | hypothetical protein                                                                                             |
| 13                                                                            | cgd7_5380 | 1.746                | 0.919              | CtIP type zinc knuckle (C2H2)                                                                                    |
| 14                                                                            | cgd4_4270 | 1.729                | 0.980              | hypothetical protein                                                                                             |
| 15                                                                            | cgd4_2480 | 1.723                | 1.078              | hypothetical protein with a signal peptide, gene within locus of signal-peptide containing hypothetical proteins |
| 16                                                                            | cgd7_4690 | 1.660                | 1.112              | RF-C paralog (Ctf18p) AAA+ ATPase                                                                                |
| 17                                                                            | cgd2_1090 | 1.600                | 1.129              | diacylglycerol acyltransferase 1                                                                                 |
| 18                                                                            | cgd8_320  | 1.595                | 1.034              | hypothetical protein                                                                                             |
| 19                                                                            | cgd8_4450 | 1.576                | 1.153              | hypothetical protein                                                                                             |
| 20                                                                            | cgd8_1340 | 1.564                | 1.122              | conserved hypothetical protein                                                                                   |
| 21                                                                            | cgd5_2020 | 1.532                | 1.075              | extracellular protein                                                                                            |
| 22                                                                            | cgd8_3850 | 1.514                | 1.153              | Ubc6p like ubiquitinating conjugating enzyme E2, possible transmembrane domain at C                              |
| 23                                                                            | cgd6_5160 | 1.467                | 1.101              | hypothetical protein with conserved carboxy terminal region (KIAA1078 protein)                                   |
| 24                                                                            | cgd8_2170 | 1.466                | 0.983              | histone H2A                                                                                                      |
| 25                                                                            | cgd8_3250 | 1.459                | 1.070              | ABC1 like protein kinase                                                                                         |
| 26                                                                            | cgd1_3680 | 1.454                | 1.129              | extracellular membrane associated protein with 3 EGF domains and a transmembrane domain                          |

|    |           |       |       |                                                                                                                                |
|----|-----------|-------|-------|--------------------------------------------------------------------------------------------------------------------------------|
| 27 | cgd6_2850 | 1.450 | 0.843 | hypothetical protein                                                                                                           |
| 28 | cgd3_2000 | 1.433 | 0.988 | WD repeat protein                                                                                                              |
| 29 | cgd2_2360 | 1.422 | 1.026 | Dop1p family protein                                                                                                           |
| 30 | cgd4_4300 | 1.422 | 1.146 | beta adaptin                                                                                                                   |
| 31 | cgd5_2320 | 1.420 | 0.958 | putative prohibitin with PHB domain                                                                                            |
| 32 | cgd7_2100 | 1.419 | 1.058 | WD repeat protein                                                                                                              |
| 33 | cgd7_2740 | 1.416 | 0.843 | WD40 protein                                                                                                                   |
| 34 | cgd2_3140 | 1.414 | 1.053 | hypothetical protein                                                                                                           |
| 35 | cgd1_620  | 1.407 | 1.129 | hypothetical protein                                                                                                           |
| 36 | cgd4_3390 | 1.399 | 1.186 | neutral sphingomyelinase activation associated factor-like BEACH domain containing protein                                     |
| 37 | cgd2_440  | 1.392 | 1.086 | signal peptide, serine proline rich, possible low mw mucin glycoprotein locus of 6 genes                                       |
| 38 | cgd7_1400 | 1.391 | 1.123 | signal peptide containing protein                                                                                              |
| 39 | cgd8_2150 | 1.379 | 0.850 | proliferating cell nuclear antigen PCNA                                                                                        |
| 40 | cgd2_1000 | 1.378 | 0.978 | bruno-like, RRM domain RNA binding protein                                                                                     |
| 41 | cgd8_3430 | 1.372 | 1.097 | zincin/aminopeptidase N like metalloprotease                                                                                   |
| 42 | cgd8_860  | 1.371 | 1.048 | coatomer protein complex subunit alpha, putative                                                                               |
| 43 | cgd3_3520 | 1.364 | 1.168 | putative sodium/calcium cation exchanger having 12 transmembrane domains and signal peptide                                    |
| 44 | cgd5_1590 | 1.363 | 1.063 | hypothetical protein                                                                                                           |
| 45 | cgd4_3690 | 1.362 | 0.944 | large glycine-rich repeat low complexity protein                                                                               |
| 46 | cgd1_1540 | 1.361 | 1.097 | dynein intermediate chain                                                                                                      |
| 47 | cgd8_4460 | 1.360 | 1.058 | cell differentiation protein rcd1, putative                                                                                    |
| 48 | cgd1_3810 | 1.359 | 1.074 | conserved hypothetical protein                                                                                                 |
| 49 | cgd4_3760 | 1.358 | 1.156 | hypothetical protein                                                                                                           |
| 50 | cgd3_3260 | 1.357 | 1.071 | hypothetical protein                                                                                                           |
| 51 | cgd3_3430 | 1.350 | 0.928 | extracellular protein with a signal peptide sequence, MAM domain and a Cu amine oxidase domain                                 |
| 52 | cgd4_3410 | 1.348 | 0.946 | RNA binding protein, putative                                                                                                  |
| 53 | cgd6_2060 | 1.348 | 1.044 | cdc39p protein-like; C-terminal Not1, CCR4-Not complex component; Not1                                                         |
| 54 | cgd5_4100 | 1.345 | 1.031 | hypothetical protein conserved in apicomplexa                                                                                  |
| 55 | cgd8_3440 | 1.342 | 1.136 | importin beta like ARM repeat alpha superhelix                                                                                 |
| 56 | cgd8_2090 | 1.342 | 1.054 | cation-transporting ATPase 2 with 8 transmembrane domains                                                                      |
| 57 | cgd6_1290 | 1.338 | 1.151 | ring finger, membrane associated, possible signal peptide                                                                      |
| 58 | cgd6_3440 | 1.337 | 0.972 | hypothetical protein                                                                                                           |
| 59 | cgd1_2770 | 1.332 | 1.110 | RNA polymerase 1 beta subunit                                                                                                  |
| 60 | cgd8_4330 | 1.331 | 1.105 | fibrillarin. RNA methylase                                                                                                     |
| 61 | cgd7_4110 | 1.331 | 1.091 | WD40 protein (part of U3 processosome)                                                                                         |
| 62 | cgd6_4370 | 1.330 | 1.056 | SPBC24E9.10-like. RRM domain protein, no PWI domain.                                                                           |
| 63 | cgd4_490  | 1.329 | 1.115 | hypothetical protein                                                                                                           |
| 64 | cgd4_2260 | 1.322 | 1.112 | ribosomal protein PO like protein of the L10 family                                                                            |
| 65 | cgd7_4510 | 1.321 | 1.181 | ATP-binding cassette, sub-family C (CFTR/MRP), member 2; Canalicular multispecific organic anion transporter; multidrug resist |
| 66 | cgd7_1090 | 1.320 | 0.982 | hypothetical protein                                                                                                           |
| 67 | cgd3_1100 | 1.320 | 0.969 | hypothetical protein                                                                                                           |
| 68 | cgd4_3280 | 1.320 | 1.043 | hypothetical protein                                                                                                           |
| 69 | cgd3_2620 | 1.318 | 0.989 | putative DNA-directed RNA polymerase, possible RNA polymerase A/beta'/A'' subunit, long PHYSPTS repeat at C-terminus           |
| 70 | cgd8_4910 | 1.312 | 0.828 | PAN2 family 3'5' exonuclease, UBC hydrolase (inactive) plus nuclease                                                           |
| 71 | cgd8_4180 | 1.312 | 1.001 | uncharacterized glycine-rich low complexity protein                                                                            |
| 72 | cgd1_2200 | 1.311 | 0.810 | hypothetical protein                                                                                                           |
| 73 | cgd7_1000 | 1.311 | 1.023 | F27M3_19 plant like RRM plus AlkB domain containing protein                                                                    |
| 74 | cgd7_1890 | 1.310 | 1.007 | KH domain protein                                                                                                              |
| 75 | cgd4_2970 | 1.308 | 1.106 | RAD1, NH2 terminal ERCC4-like helicase domain                                                                                  |
| 76 | cgd8_4950 | 1.300 | 0.923 | RecQ4 SF II RNA helicase                                                                                                       |
| 77 | cgd8_3230 | 1.299 | 1.018 | conserved hypothetical protein                                                                                                 |
| 78 | cgd3_1980 | 1.299 | 1.040 | hypothetical protein                                                                                                           |
| 79 | cgd5_1050 | 1.299 | 0.915 | hypothetical protein                                                                                                           |
| 80 | cgd7_1440 | 1.298 | 1.064 | protein with 5 TPR domains                                                                                                     |
| 81 | cgd5_2370 | 1.294 | 1.171 | 60S acidic ribosomal protein LP1 like protein of possible plant origin                                                         |
| 82 | cgd8_2800 | 1.294 | 1.063 | extracellular protein with a signal peptide, a mucin-like stretch of threonine residues and 6 notch domains; possible mucin    |
| 83 | cgd5_2650 | 1.290 | 1.198 | hypothetical protein                                                                                                           |
| 84 | cgd3_1910 | 1.290 | 0.995 | hypothetical protein                                                                                                           |
| 85 | cgd7_4520 | 1.289 | 1.074 | ABC ATPase (2 ABC domains) with 10 transmembrane domains, adjacent duplicated gene                                             |
| 86 | cgd8_260  | 1.288 | 0.972 | hypothetical protein                                                                                                           |
| 87 | cgd1_1580 | 1.288 | 1.084 | RING finger domain at N-terminus, CCCH domain at C-terminus, involved in RNA metabolism, HC-23 protein                         |
| 88 | cgd8_1580 | 1.287 | 1.051 | saccharomyces Yor006cp like protein conserved across euks and archaea                                                          |
| 89 | cgd7_2480 | 1.287 | 1.046 | hypothetical membrane protein                                                                                                  |

|     |           |       |       |                                                                                                                                                         |
|-----|-----------|-------|-------|---------------------------------------------------------------------------------------------------------------------------------------------------------|
| 90  | cgd3_1540 | 1.286 | 1.044 | large protein with signal peptide. cysteine-rich, threonine-rich, possible mucin                                                                        |
| 91  | cgd3_510  | 1.286 | 1.117 | putative fucose translocator with 8 transmembrane domains, within locus of 3 paralogous genes                                                           |
| 92  | cgd2_2980 | 1.286 | 1.156 | hypothetical protein                                                                                                                                    |
| 93  | cgd6_3160 | 1.284 | 1.032 | large low complexity protein                                                                                                                            |
| 94  | cgd7_2300 | 1.283 | 1.093 | translation initiation factor if-5A                                                                                                                     |
| 95  | cgd6_3900 | 1.281 | 1.075 | hypothetical protein                                                                                                                                    |
| 96  | cgd5_1220 | 1.280 | 1.087 | hypothetical protein                                                                                                                                    |
| 97  | cgd8_330  | 1.278 | 0.925 | hypothetical protein                                                                                                                                    |
| 98  | cgd7_3180 | 1.278 | 1.054 | T complex chaperonin                                                                                                                                    |
| 99  | cgd5_650  | 1.277 | 1.131 | conserved hypothetical protein                                                                                                                          |
| 100 | cgd7_4060 | 1.276 | 1.105 | signal recognition particle SPR72                                                                                                                       |
| 101 | cgd4_2770 | 1.275 | 1.088 | 11 transmembrane domain protein, possible aa transporter                                                                                                |
| 102 | cgd5_970  | 1.275 | 1.122 | 60S ribosomal protein L13A                                                                                                                              |
| 103 | cgd5_2410 | 1.274 | 1.054 | conserved possible esterase of the beta-lactamase family, of possible plant or bacterial origin, possible transmembrane domain within N terminal region |
| 104 | cgd8_1920 | 1.274 | 1.042 | mannose-6-phosphate isomerase                                                                                                                           |
| 105 | cgd1_1290 | 1.273 | 1.094 | apicomplexa specific secreted protein Pf (23508265), signal peptide                                                                                     |
| 106 | cgd6_2960 | 1.272 | 1.019 | Bax inhibitor-1 (BI-1). integral membrane protein with 6 or more transmembrane domains                                                                  |
| 107 | cgd8_130  | 1.272 | 1.020 | conserved hypothetical protein                                                                                                                          |
| 108 | cgd5_2910 | 1.271 | 0.930 | alpha amylase                                                                                                                                           |
| 109 | cgd2_4080 | 1.271 | 0.826 | RP-A, OB fold single strand binding protein                                                                                                             |
| 110 | cgd3_4290 | 1.270 | 0.902 | DNA polymerase alpha catalytic subunit                                                                                                                  |
| 111 | cgd5_3490 | 1.267 | 1.162 | hypothetical protein with signal peptide                                                                                                                |
| 112 | cgd6_110  | 1.266 | 1.014 | conserved protein with signal peptide and transmembrane domain or GPI anchor signal near C-terminus                                                     |
| 113 | cgd4_30   | 1.266 | 1.102 | hypothetical protein                                                                                                                                    |
| 114 | cgd8_5180 | 1.266 | 0.925 | hypothetical protein                                                                                                                                    |
| 115 | cgd5_2060 | 1.266 | 1.065 | hypothetical protein with signal peptide and mucin-like threonine repeats                                                                               |
| 116 | cgd7_4450 | 1.265 | 1.081 | elongation factor EF1-gamma (glutathione S-transferase family)                                                                                          |
| 117 | cgd6_4690 | 1.264 | 1.102 | SAC3/GANP/Rpn12p family                                                                                                                                 |
| 118 | cgd2_2670 | 1.264 | 1.071 | UDP N-acetylglucosamine transporter-like nucleotide sugar transporter with 10 transmembrane domains                                                     |
| 119 | cgd7_1970 | 1.263 | 1.110 | nuclear pore associated protein (NLP4) with N-terminal ubiquitin domain                                                                                 |
| 120 | cgd6_5130 | 1.262 | 0.965 | Trm5 RNA methyltransferase                                                                                                                              |
| 121 | cgd4_1920 | 1.262 | 0.921 | hypothetical protein                                                                                                                                    |
| 122 | cgd3_1390 | 1.261 | 0.986 | hypothetical protein                                                                                                                                    |
| 123 | cgd7_5220 | 1.259 | 1.172 | splicing factor with 3 RRM domains                                                                                                                      |
| 124 | cgd1_680  | 1.259 | 1.086 | hypothetical protein                                                                                                                                    |
| 125 | cgd5_3320 | 1.258 | 1.039 | hypothetical protein                                                                                                                                    |
| 126 | cgd2_3680 | 1.258 | 1.064 | eukaryotic ribosome biogenesis; Erb1p, putative                                                                                                         |
| 127 | cgd3_3910 | 1.256 | 0.976 | prolyl 4-hydroxylase alpha subunit                                                                                                                      |
| 128 | cgd7_1460 | 1.255 | 1.100 | ribosomal protein S27                                                                                                                                   |
| 129 | cgd7_4610 | 1.255 | 1.063 | divergent membrane protein                                                                                                                              |
| 130 | cgd8_1500 | 1.254 | 1.058 | FH2 domain containing protein                                                                                                                           |
| 131 | cgd7_4150 | 1.254 | 1.096 | PP2C phosphatase                                                                                                                                        |
| 132 | cgd7_4930 | 1.254 | 1.009 | secreted glycosyltransferase, possible transmembrane domain near C-terminus                                                                             |
| 133 | cgd7_3660 | 1.254 | 0.942 | proteasome subunit alpha2, protease of the acylase family and NTN hydrolase fold                                                                        |
| 134 | cgd6_770  | 1.253 | 1.023 | hypothetical protein                                                                                                                                    |
| 135 | cgd8_4770 | 1.252 | 0.929 | hypothetical protein                                                                                                                                    |
| 136 | cgd6_4360 | 1.252 | 1.021 | hypothetical protein having a signal peptide and 4 transmembrane domains                                                                                |
| 137 | cgd7_1900 | 1.251 | 1.057 | mitochondrial NADH dehydrogenase                                                                                                                        |
| 138 | cgd3_2400 | 1.251 | 1.154 | Yn1201cp-family protein                                                                                                                                 |
| 139 | cgd3_1590 | 1.250 | 1.091 | Spb4p, eIF4a-1-family RNA SFII helicase, DEXDc+HELICc domains                                                                                           |
| 140 | cgd6_4610 | 1.249 | 1.013 | mRNA export protein, putative                                                                                                                           |
| 141 | cgd7_70   | 1.248 | 1.192 | integral membrane protein with 6 transmembrane domains and possible ring domain                                                                         |
| 142 | cgd7_650  | 1.248 | 1.097 | conserved hypothetical protein                                                                                                                          |
| 143 | cgd7_610  | 1.248 | 0.942 | apicomplexan conserved protein                                                                                                                          |
| 144 | cgd2_1630 | 1.247 | 0.925 | cytidine and deoxycytidylate deaminase family, putative                                                                                                 |
| 145 | cgd8_2590 | 1.246 | 1.183 | hypothetical protein                                                                                                                                    |
| 146 | cgd6_1910 | 1.246 | 1.117 | conserved hypothetical protein                                                                                                                          |
| 147 | cgd6_1410 | 1.245 | 1.048 | pre-mRNA splicing factor ATP-dependent RNA helicase, putative                                                                                           |
| 148 | cgd3_1850 | 1.245 | 1.058 | putative casein kinase II regulatory subunit; besthit Pf 23508244                                                                                       |
| 149 | cgd5_2420 | 1.245 | 0.907 | hypothetical protein                                                                                                                                    |
| 150 | cgd7_3780 | 1.244 | 1.113 | cyclin                                                                                                                                                  |
| 151 | cgd7_140  | 1.244 | 1.106 | SprT family metalloproteinase                                                                                                                           |
| 152 | cgd3_300  | 1.243 | 1.179 | rasputin. nuclear transport factor 2 (NTF2) domain plus RRM domain                                                                                      |
| 153 | cgd8_2930 | 1.242 | 1.147 | Eft2p GTPase; translation elongation factor 2 (EF-2)                                                                                                    |

|     |           |       |       |                                                                                                                                                  |
|-----|-----------|-------|-------|--------------------------------------------------------------------------------------------------------------------------------------------------|
| 154 | cgd2_2700 | 1.242 | 0.985 | Brf1p like coiled coil protein                                                                                                                   |
| 155 | cgd6_2470 | 1.241 | 1.165 | thioredoxin (quiescin Q6 like) having signal peptide and 12 transmembrane domains                                                                |
| 156 | cgd4_1960 | 1.241 | 1.044 | ThiF/moeB family                                                                                                                                 |
| 157 | cgd5_2070 | 1.240 | 1.028 | SPAC694.02. SKI family SFII helicase                                                                                                             |
| 158 | cgd5_1570 | 1.240 | 0.884 | YIP1 protein like transporter GTPase interacting factor having 5 transmembrane domain                                                            |
| 159 | cgd8_70   | 1.238 | 1.186 | conserved hypothetical protein                                                                                                                   |
| 160 | cgd8_1060 | 1.238 | 1.010 | uncharacterized conserved protein                                                                                                                |
| 161 | cgd6_3880 | 1.238 | 1.017 | mitochondrial carrier protein MRS2 with 2 transmembrane domains                                                                                  |
| 162 | cgd6_5430 | 1.237 | 1.035 | hypothetical protein, signal peptide plus transmembrane domain or GPI anchor                                                                     |
| 163 | cgd8_4240 | 1.237 | 0.944 | possible spliceosome factor                                                                                                                      |
| 164 | cgd1_810  | 1.237 | 1.006 | protein kinase                                                                                                                                   |
| 165 | cgd6_2750 | 1.236 | 0.911 | cysteine protease, putative                                                                                                                      |
| 166 | cgd7_2830 | 1.236 | 0.968 | hypothetical low complexity protein                                                                                                              |
| 167 | cgd2_840  | 1.235 | 1.048 | phosphatidylinositol N-acetylglucosaminyltransferase subunit PIG-P, involved in GPI anchor biosynthesis, multitransmembrane domain               |
| 168 | cgd6_1380 | 1.235 | 1.027 | histone deacetylase HDA2/Rpd3p                                                                                                                   |
| 169 | cgd8_340  | 1.235 | 1.063 | exoribonuclease PH, putative                                                                                                                     |
| 170 | cgd8_870  | 1.234 | 0.941 | DNA dependent DNA polymerase alpha subunit, inactive calcineurin like phosphatase subunit                                                        |
| 171 | cgd3_1230 | 1.233 | 1.016 | SPAC14C4.06c-like PWI+4CCCH domains                                                                                                              |
| 172 | cgd8_3590 | 1.232 | 1.052 | predicted secreted protein                                                                                                                       |
| 173 | cgd4_3310 | 1.231 | 1.006 | phosphoacetyl glucosamine mutase                                                                                                                 |
| 174 | cgd2_2720 | 1.230 | 1.079 | ARM repeat protein                                                                                                                               |
| 175 | cgd7_250  | 1.229 | 1.132 | conserved protein                                                                                                                                |
| 176 | cgd4_4230 | 1.229 | 1.130 | ATP-dependent helicase, putative                                                                                                                 |
| 177 | cgd5_50   | 1.228 | 0.831 | signal peptide containing protein                                                                                                                |
| 178 | cgd2_60   | 1.227 | 1.037 | hypothetical protein                                                                                                                             |
| 179 | cgd3_4040 | 1.227 | 0.977 | hypothetical protein with signal peptide, proline rich                                                                                           |
| 180 | cgd3_3460 | 1.227 | 1.105 | hypothetical protein with cysteine rich regions                                                                                                  |
| 181 | cgd2_4340 | 1.226 | 1.059 | mitogen-activated protein kinase 2, putative                                                                                                     |
| 182 | cgd7_4190 | 1.226 | 1.032 | cation-transporting P-type ATPase with 11 or more transmembrane domains                                                                          |
| 183 | cgd6_1420 | 1.225 | 1.053 | cdc2-related protein kinase, putative                                                                                                            |
| 184 | cgd2_2080 | 1.225 | 0.977 | hypothetical protein                                                                                                                             |
| 185 | cgd2_1480 | 1.224 | 0.974 | splicing factor U2AF U2 SnRNP auxiliary factor large subunit, RRM domain                                                                         |
| 186 | cgd3_2520 | 1.224 | 1.005 | conserved hypothetical protein                                                                                                                   |
| 187 | cgd6_2590 | 1.223 | 0.940 | histone acetyltransferase (MYST family); chromo domain + C2H2 domain                                                                             |
| 188 | cgd4_3000 | 1.223 | 1.079 | Dbp1p, eIF4a-1 family RNA SFII helicase (DEXDC+HELICc)                                                                                           |
| 189 | cgd8_3760 | 1.223 | 1.151 | predicted membrane associated protein, signal peptide, transmembrane domain near C                                                               |
| 190 | cgd6_2970 | 1.221 | 1.065 | tyrosyl-tRNA synthetase (tyrosyl-tRNA ligase; TyrRS). class-I aaRS                                                                               |
| 191 | cgd8_3520 | 1.220 | 1.034 | secreted protein with cysteine rich repeats and a mucin like threonine rich repeat, signal peptide                                               |
| 192 | cgd7_1550 | 1.220 | 0.981 | uncharacterized protein                                                                                                                          |
| 193 | cgd3_1450 | 1.220 | 1.067 | replication factor C like AAA+ ATPase                                                                                                            |
| 194 | cgd6_4580 | 1.219 | 1.084 | RNA polymerase III C34 subunit; rpc34p ortholog                                                                                                  |
| 195 | cgd6_5080 | 1.219 | 1.088 | GroEL-like chaperone (ATPase); T-complex protein 1                                                                                               |
| 196 | cgd7_1540 | 1.219 | 1.036 | aspartate--tRNA ligase                                                                                                                           |
| 197 | cgd6_3810 | 1.219 | 1.075 | NUDIX domain protein; mRNA cleavage factor-like protein Im like, plant+animal group                                                              |
| 198 | cgd6_1400 | 1.219 | 1.013 | hypothetical protein                                                                                                                             |
| 199 | cgd4_2270 | 1.218 | 1.141 | oxidoreductase, short-chain dehydrogenase family, putative                                                                                       |
| 200 | cgd2_1960 | 1.218 | 1.119 | mitogen-activated protein kinase 1, serine/threonine protein kinase, putative                                                                    |
| 201 | cgd2_3060 | 1.218 | 0.989 | hypothetical protein                                                                                                                             |
| 202 | cgd2_470  | 1.217 | 0.946 | very low complexity large protein, possible unreal ORF?                                                                                          |
| 203 | cgd8_2730 | 1.217 | 0.934 | multidomain chromatinic protein with the following architecture: 3x PHD-bromo-3xPHD-SET domain and associated cysteine cluster at the C-terminus |
| 204 | cgd7_1780 | 1.217 | 1.151 | tRNA exportin type nuclear export protein                                                                                                        |
| 205 | cgd5_3300 | 1.217 | 1.078 | large protein with 4 PHD domains                                                                                                                 |
| 206 | cgd6_2150 | 1.217 | 1.003 | U1 snrnp, putative                                                                                                                               |
| 207 | cgd8_4220 | 1.216 | 1.076 | conserved hypothetical protein                                                                                                                   |
| 208 | cgd4_3090 | 1.215 | 1.030 | oocyst wall protein 6                                                                                                                            |
| 209 | cgd7_4470 | 1.215 | 1.127 | CDC14 phosphatase                                                                                                                                |
| 210 | cgd1_1700 | 1.214 | 1.090 | GATA type DNA binding domain fused to an AT hook                                                                                                 |
| 211 | cgd5_1460 | 1.213 | 1.126 | hypothetical protein with signal peptide                                                                                                         |
| 212 | cgd3_2080 | 1.212 | 1.069 | large protein with 8 or more transmembrane domains within NH2 region                                                                             |
| 213 | cgd6_3190 | 1.212 | 1.069 | 60S ribosomal protein-like, putative                                                                                                             |
| 214 | cgd1_1280 | 1.211 | 1.035 | domain KOG1676, K-homology type RNA binding proteins                                                                                             |
| 215 | cgd7_2660 | 1.211 | 1.100 | RAD24/Rf-C activator 1 AAA+ ATPase                                                                                                               |
| 216 | cgd3_3870 | 1.209 | 1.036 | conserved hypothetical protein                                                                                                                   |
| 217 | cgd2_3640 | 1.208 | 1.075 | hypothetical protein with region conserved in apicomplexa                                                                                        |
| 218 | cgd7_4030 | 1.208 | 1.026 | hypothetical low complexity protein                                                                                                              |

|     |           |       |       |                                                                                                 |
|-----|-----------|-------|-------|-------------------------------------------------------------------------------------------------|
| 219 | cgd3_360  | 1.208 | 1.124 | hypothetical protein                                                                            |
| 220 | cgd4_560  | 1.207 | 0.933 | hypothetical protein                                                                            |
| 221 | cgd4_3890 | 1.207 | 0.917 | hypothetical protein                                                                            |
| 222 | cgd3_1040 | 1.207 | 1.164 | hypothetical protein                                                                            |
| 223 | cgd6_3580 | 1.207 | 1.064 | hypothetical protein with 3 or more transmembrane domains                                       |
| 224 | cgd5_320  | 1.207 | 0.949 | carboxylesterase , lysophospholipase, signal peptide                                            |
| 225 | cgd2_3100 | 1.207 | 1.137 | hypothetical protein, 8 transmembrane domains                                                   |
| 226 | cgd6_2360 | 1.206 | 0.991 | mitochondrial FAD carrier protein                                                               |
| 227 | cgd4_3810 | 1.205 | 1.064 | putative transcription factor IIE alpha subunit                                                 |
| 228 | cgd3_1810 | 1.204 | 1.043 | casein kinase I                                                                                 |
| 229 | cgd6_5410 | 1.204 | 0.989 | signal peptide plus thr stretch, charged repeats, likely mucin                                  |
| 230 | cgd7_4590 | 1.204 | 1.074 | Mth1. SpoU superfamily - SPOUT methylase                                                        |
| 231 | cgd3_1520 | 1.203 | 1.007 | hypothetical protein with transmembrane or GPI anchor sequence at carboxy terminus              |
| 232 | cgd2_2710 | 1.202 | 1.081 | TrmA RNA methylase                                                                              |
| 233 | cgd7_4090 | 1.202 | 1.079 | alpha superhelical protein, divergent TPR like repeats, possible microtubule associated protein |
| 234 | cgd1_2610 | 1.201 | 0.953 | hypothetical protein                                                                            |
| 235 | cgd7_4790 | 1.201 | 1.068 | Ptc7p phosphatase (PP2C family)                                                                 |
| 236 | cgd1_1570 | 1.201 | 1.088 | transcription factor E2F                                                                        |

**Cluster 3 0.5 h: Up-regulated (Ratio > 1.2) vs. 5 h: Down-regulated (Ratio < 0.8)**

| No. | GeneID    | Signal Ratio (0.5 h) | Signal Ratio (5 h) | Description                                                   |
|-----|-----------|----------------------|--------------------|---------------------------------------------------------------|
| 1   | cgd6_4390 | 1.419                | 0.772              | hypothetical low complexity protein                           |
| 2   | cgd6_4240 | 1.417                | 0.769              | MO25 protein                                                  |
| 3   | cgd8_2420 | 1.338                | 0.797              | transcription initiation factor IIF/ Rap30 like winged HTH    |
| 4   | cgd3_1860 | 1.326                | 0.791              | extracellular protein with a signal peptide and 9 EGF domains |
| 5   | cgd6_50   | 1.306                | 0.682              | hypothetical protein                                          |
| 6   | cgd3_60   | 1.238                | 0.742              | hypothetical protein                                          |

**Cluster 4 0.5 h: Normal (Ratio = 0.8-1.2) vs. 5 h: Up-regulated (Ratio > 1.2)**

| No. | GeneID    | Signal Ratio (0.5 h) | Signal Ratio (5 h) | Description                                                                                                                                                         |
|-----|-----------|----------------------|--------------------|---------------------------------------------------------------------------------------------------------------------------------------------------------------------|
| 1   | cgd2_300  | 1.199                | 1.210              | kelch repeat-containing proteins that is fused to a HSP90-like ATPase                                                                                               |
| 2   | cgd5_1950 | 1.189                | 1.214              | hypothetical protein with 5 transmembrane domains                                                                                                                   |
| 3   | cgd4_3990 | 1.182                | 1.207              | hypothetical protein with possible transmembrane domain near N-terminus                                                                                             |
| 4   | cgd7_930  | 1.182                | 1.233              | hypothetical transmembrane protein                                                                                                                                  |
| 5   | cgd7_3830 | 1.173                | 1.243              | conserved hypothetical protein                                                                                                                                      |
| 6   | cgd4_2010 | 1.168                | 1.258              | conserved hypothetical protein                                                                                                                                      |
| 7   | cgd3_2630 | 1.159                | 1.400              | diacylglycerol kinase                                                                                                                                               |
| 8   | cgd8_5190 | 1.154                | 1.615              | large protein with central conserved domain, possible BCRT domain                                                                                                   |
| 9   | cgd1_1240 | 1.147                | 1.263              | Sec14 domain containing protein                                                                                                                                     |
| 10  | cgd7_3200 | 1.132                | 1.278              | DHHC family palmitoyltransferase, 4 transmembrane domains plus possible signal peptide                                                                              |
| 11  | cgd8_740  | 1.132                | 1.261              | prefoldin like molecular chaperone                                                                                                                                  |
| 12  | cgd7_2510 | 1.131                | 1.217              | conserved hypothetical protein                                                                                                                                      |
| 13  | cgd7_4980 | 1.126                | 1.230              | large uncharacterized low complexity protein                                                                                                                        |
| 14  | cgd6_2560 | 1.122                | 1.232              | hypothetical protein                                                                                                                                                |
| 15  | cgd6_3270 | 1.122                | 1.218              | 26S proteasome-associated Mov34/MPN/PAD-1 family. JAB domain.                                                                                                       |
| 16  | cgd2_2610 | 1.119                | 1.331              | conserved hypothetical protein                                                                                                                                      |
| 17  | cgd7_3470 | 1.112                | 1.275              | large low complexity protein, potential zinc ribbon                                                                                                                 |
| 18  | cgd7_1470 | 1.110                | 1.202              | hypothetical protein                                                                                                                                                |
| 19  | cgd6_4790 | 1.104                | 1.259              | predicted degraded Zn-finger +bbox Zn finger protein                                                                                                                |
| 20  | cgd7_2960 | 1.103                | 1.376              | hypothetical protein                                                                                                                                                |
| 21  | cgd4_1900 | 1.097                | 1.682              | hypothetical protein                                                                                                                                                |
| 22  | cgd1_2790 | 1.094                | 1.498              | hypothetical protein                                                                                                                                                |
| 23  | cgd5_470  | 1.085                | 1.325              | hypothetical protein                                                                                                                                                |
| 24  | cgd2_2630 | 1.083                | 1.260              | hypothetical protein, signal peptide plus 11 transmembrane domains                                                                                                  |
| 25  | cgd3_2730 | 1.077                | 1.438              | protein with 10 transmembrane domains, possible calcium transporting ATPase or aminophospholipid transporter                                                        |
| 26  | cgd1_1500 | 1.075                | 1.299              | hypothetical protein                                                                                                                                                |
| 27  | cgd7_520  | 1.074                | 1.212              | cyclin/cyclophilin like peptidyl-prolyl cis-trans isomerase fused to WD40 repeats at the N-terminus'                                                                |
| 28  | cgd8_2720 | 1.069                | 1.364              | insulinase like metalloprotease                                                                                                                                     |
| 29  | cgd6_3690 | 1.067                | 1.245              | hypothetical, PF13_0020_pfal-like; PUG (domain in protein kinases, N-glycanases and other nuclear proteins) + UBX (domain present in ubiquitin-regulatory proteins) |
| 30  | cgd1_2620 | 1.059                | 1.205              | calcium antiporter, Na/Ca exchange associated membrane protein with 11 transmembrane domains                                                                        |
| 31  | cgd6_250  | 1.058                | 1.394              | hypothetical protein                                                                                                                                                |
| 32  | cgd1_3050 | 1.058                | 1.249              | cation diffusion facilitator like membrane protein transporter, 6x transmembrane domains                                                                            |
| 33  | cgd7_2980 | 1.057                | 1.968              | Low complexity protein with a potential C2C2 zinc ribbon                                                                                                            |

|    |           |       |       |                                                                                                                          |
|----|-----------|-------|-------|--------------------------------------------------------------------------------------------------------------------------|
| 34 | cgd6_3840 | 1.056 | 1.236 | SET domain containing protein                                                                                            |
| 35 | cgd2_1200 | 1.050 | 1.340 | steroid reductase like integral membrane protein with 4x transmembrane domains and an ubiquitin domain at its N-terminus |
| 36 | cgd5_520  | 1.049 | 1.582 | MJ1157-like thiouridine synthase (Ploop atpase) plus Zn ribbon. involved in RNA metabolism.                              |
| 37 | cgd2_3730 | 1.044 | 1.206 | conserved hypothetical protein                                                                                           |
| 38 | cgd3_1620 | 1.042 | 1.243 | conserved hypothetical protein                                                                                           |
| 39 | cgd8_2360 | 1.040 | 1.281 | hypothetical protein                                                                                                     |
| 40 | cgd2_1040 | 1.032 | 1.831 | flavoheomprotein b5+b5R (DJ676J13.1) (flavoheomprotein b5+b5R cytochrome b-type NAD(P)H oxidoreductase), putative        |
| 41 | cgd1_1230 | 1.027 | 1.237 | predicted secreted protein, signal peptide                                                                               |
| 42 | cgd4_570  | 1.027 | 1.223 | ubiquitin-conjugating enzyme                                                                                             |
| 43 | cgd1_3120 | 1.023 | 1.222 | peptide synthase like condensation domain                                                                                |
| 44 | cgd8_3040 | 1.022 | 1.204 | predicted membrane associated protein, transmembrane domain near C-terminus                                              |
| 45 | cgd8_10   | 1.018 | 1.236 | uncharacterized protein                                                                                                  |
| 46 | cgd6_1560 | 1.014 | 1.255 | Yju2p / cwf16-like; Zn finger                                                                                            |
| 47 | cgd6_920  | 1.013 | 1.298 | 26s protease regulatory subunit 8, putative                                                                              |
| 48 | cgd1_2640 | 1.007 | 1.293 | hypothetical protein with RING-H2 like RING domain                                                                       |
| 49 | cgd5_1020 | 1.004 | 1.428 | apicomplexan conserved protein with 9 transmembrane domain                                                               |
| 50 | cgd6_4330 | 1.004 | 1.372 | phosphoglycerate mutase family                                                                                           |
| 51 | cgd1_2070 | 0.997 | 1.368 | hypothetical protein                                                                                                     |
| 52 | cgd2_1650 | 0.996 | 1.328 | dolichyl-diphosphooligosaccharide-protein glycosyltransferase beta subunit (Wbp1p)                                       |
| 53 | cgd2_1920 | 0.990 | 1.412 | hypothetical protein                                                                                                     |
| 54 | cgd1_1150 | 0.988 | 1.359 | hypothetical protein                                                                                                     |
| 55 | cgd1_2910 | 0.980 | 1.660 | conserved hypothetical protein                                                                                           |
| 56 | cgd5_3430 | 0.979 | 1.244 | DNAj protein with possible transmembrane domain within C-terminal region                                                 |
| 57 | cgd1_2120 | 0.976 | 1.249 | protein phosphatase regulator like heat repeats                                                                          |
| 58 | cgd4_400  | 0.972 | 1.384 | protein with possible 2 TPR domains                                                                                      |
| 59 | cgd2_670  | 0.972 | 1.298 | hypothetical protein, 6 transmembrane domains                                                                            |
| 60 | cgd5_570  | 0.967 | 1.327 | hypothetical protein, 5 transmembrane domains near N-terminus                                                            |
| 61 | cgd3_3710 | 0.961 | 1.699 | hypothetical protein                                                                                                     |
| 62 | cgd1_1650 | 0.953 | 1.278 | hypothetical protein                                                                                                     |
| 63 | cgd5_3600 | 0.952 | 1.463 | predicted secreted protein                                                                                               |
| 64 | cgd3_2050 | 0.951 | 1.508 | putative prolyl 4-hydroxylase alpha subunit homolog, 2-oxoglutarate-dependent dioxygenase                                |
| 65 | cgd8_2390 | 0.947 | 1.310 | diacylglycerol kinase                                                                                                    |
| 66 | cgd4_3900 | 0.945 | 1.664 | hypothetical protein                                                                                                     |
| 67 | cgd7_3690 | 0.945 | 1.415 | crooked neck protein HAT repeats                                                                                         |
| 68 | cgd7_2010 | 0.943 | 1.264 | hypothetical membrane protein                                                                                            |
| 69 | cgd6_5040 | 0.942 | 1.360 | transcription factor, putative                                                                                           |
| 70 | cgd1_2110 | 0.940 | 1.347 | protein kinase with WD40 repeat at C-terminus                                                                            |
| 71 | cgd6_4180 | 0.935 | 1.241 | ubiquitin-conjugating enzyme                                                                                             |
| 72 | cgd2_1810 | 0.934 | 1.253 | CysQ, sulfite synthesis pathway protein, putative                                                                        |
| 73 | cgd4_2680 | 0.933 | 1.208 | N-methyl-D-aspartate receptor-associated protein, 7 transmembrane domain protein                                         |
| 74 | cgd4_3450 | 0.932 | 1.202 | large low complexity protein with signal peptide, within large locus of signal peptide containing proteins               |
| 75 | cgd5_1930 | 0.930 | 1.287 | hypothetical protein                                                                                                     |
| 76 | cgd1_2980 | 0.918 | 1.210 | 14-3-3 protein                                                                                                           |
| 77 | cgd1_3150 | 0.916 | 1.334 | cyclin'cyclin'                                                                                                           |
| 78 | cgd7_1250 | 0.912 | 1.248 | hypothetical protein                                                                                                     |
| 79 | cgd5_3880 | 0.912 | 1.210 | hypothetical protein                                                                                                     |
| 80 | cgd2_3940 | 0.911 | 1.590 | predicted fatty acid binding protein                                                                                     |
| 81 | cgd2_3160 | 0.910 | 1.262 | hypothetical protein                                                                                                     |
| 82 | cgd5_4500 | 0.907 | 1.325 | possible vacuolar protein sorting associated protein (VPS)                                                               |
| 83 | cgd8_1730 | 0.902 | 1.268 | Uba3p like ubiquitin activating enzyme E1                                                                                |
| 84 | cgd4_3720 | 0.900 | 1.495 | possible 2 TPR domains at N-terminus                                                                                     |
| 85 | cgd1_770  | 0.900 | 1.364 | hypothetical protein, possible apicomplexan-conserved                                                                    |
| 86 | cgd7_3900 | 0.898 | 1.294 | hypothetical protein                                                                                                     |
| 87 | cgd4_1750 | 0.885 | 1.238 | hypothetical protein                                                                                                     |
| 88 | cgd7_40   | 0.880 | 1.222 | calcium/calmodulin-dependent protein kinase with a kinase domain and 2 calmodulin-like EF hands                          |
| 89 | cgd6_1090 | 0.871 | 1.270 | DnaJ(hsp40)'DnaJ(hsp40)'                                                                                                 |
| 90 | cgd8_3020 | 0.870 | 1.260 | hypothetical protein                                                                                                     |
| 91 | cgd3_2820 | 0.861 | 1.200 | conserved hypothetical protein                                                                                           |
| 92 | cgd2_930  | 0.858 | 1.524 | peptidase'insulinase-like peptidase'                                                                                     |
| 93 | cgd2_3170 | 0.850 | 1.258 | tbc domain-containing protein                                                                                            |
| 94 | cgd3_4330 | 0.844 | 1.645 | Dbr1p-like RNA lariat debranching enzyme                                                                                 |
| 95 | cgd2_2490 | 0.839 | 1.262 | hypothetical protein, possible transmembrane domain at C-terminus                                                        |
| 96 | cgd5_2360 | 0.838 | 1.270 | p27 like 26S proteasomal subunit with a PDZ domain                                                                       |
| 97 | cgd8_2540 | 0.837 | 1.218 | apicomplexan specific coiled coil protein                                                                                |
| 98 | cgd8_90   | 0.835 | 1.292 | hypothetical protein                                                                                                     |

|     |          |       |       |                                                                               |
|-----|----------|-------|-------|-------------------------------------------------------------------------------|
| 99  | cgd7_720 | 0.834 | 1.266 | PASILLA splice variant 3-like 2KH domains, transmembrane domain at C-terminus |
| 100 | cgd4_550 | 0.816 | 1.372 | hypothetical protein                                                          |

**Cluster 5 0.5 h: Normal (Ratio = 0.8-1.2) vs. 5 h: Normal (Ratio = 0.8-1.2)**

| No. | GeneID    | Signal Ratio (0.5 h) | Signal Ratio (5 h) | Description                                                                                                  |
|-----|-----------|----------------------|--------------------|--------------------------------------------------------------------------------------------------------------|
| 1   | cgd2_220  | 1.200                | 1.049              | transcription factor TFIIIF                                                                                  |
| 2   | cgd7_4310 | 1.199                | 1.041              | extracellular protein with a signal peptide and 4 SCP domains                                                |
| 3   | cgd8_2180 | 1.199                | 0.921              | protein kinase                                                                                               |
| 4   | cgd8_2210 | 1.199                | 0.812              | RCC1 like beta propeller protein                                                                             |
| 5   | cgd1_3400 | 1.199                | 1.072              | hypothetical protein                                                                                         |
| 6   | cgd5_3690 | 1.198                | 0.938              | protein with 8 transmembrane domains                                                                         |
| 7   | cgd1_3020 | 1.197                | 0.995              | fructose-1,6-bisphosphate aldolase                                                                           |
| 8   | cgd8_3720 | 1.196                | 1.103              | D441/Mpe1p like protein with a zinc knuckle (C2HC) and PhD Zn finger domain                                  |
| 9   | cgd6_1760 | 1.196                | 0.824              | phosphatidylinositol 3-kinase; PI3ka plus PI3Kc domains                                                      |
| 10  | cgd5_3370 | 1.196                | 1.008              | hypothetical protein                                                                                         |
| 11  | cgd3_3880 | 1.196                | 1.133              | Snu114p GTPase, U5 snRNP-specific protein, 116 kDa                                                           |
| 12  | cgd8_1850 | 1.196                | 1.004              | E2F like domain containing transcription factor with the wHTH fold                                           |
| 13  | cgd2_1390 | 1.195                | 1.133              | hypothetical protein                                                                                         |
| 14  | cgd1_3510 | 1.193                | 0.972              | TSP1 domain-containing protein TSP3 precursor                                                                |
| 15  | cgd3_2710 | 1.193                | 0.977              | hypothetical protein                                                                                         |
| 16  | cgd5_1920 | 1.192                | 1.071              | pleckstrin homology (PH) domain containing protein                                                           |
| 17  | cgd2_1860 | 1.192                | 0.992              | TBC domain containing protein                                                                                |
| 18  | cgd2_2690 | 1.192                | 1.049              | hypothetical protein                                                                                         |
| 19  | cgd6_120  | 1.191                | 0.998              | disulfide-isomerase, signal peptide plus ER retention motif, putative ER protein                             |
| 20  | cgd4_3010 | 1.190                | 1.075              | hypothetical protein                                                                                         |
| 21  | cgd2_750  | 1.190                | 1.184              | bub3'bub3-like protein with WD40 repeats'                                                                    |
| 22  | cgd2_2960 | 1.190                | 1.109              | phosphoprotein phosphatase related, putative                                                                 |
| 23  | cgd5_4390 | 1.190                | 1.047              | Ser/Thr protein kinase                                                                                       |
| 24  | cgd4_3080 | 1.189                | 1.024              | ribosomal protein S27a, ubiquitin plus zincribbon, UB13p                                                     |
| 25  | cgd6_3960 | 1.189                | 1.079              | elongation factor-like protein                                                                               |
| 26  | cgd4_3360 | 1.189                | 1.071              | WD repeat protein                                                                                            |
| 27  | cgd1_1270 | 1.189                | 1.004              | hypothetical protein with PUG domain fused to a UBA domain and a predicted protease at the N-terminus        |
| 28  | cgd6_1590 | 1.188                | 1.055              | eukaryotic translation initiation factor 4 gamma; Nic domain containing protein                              |
| 29  | cgd4_590  | 1.188                | 1.002              | conserved hypothetical protein                                                                               |
| 30  | cgd8_4060 | 1.188                | 0.880              | 26S proteasomal subunit S3; PINT domain containing protein                                                   |
| 31  | cgd4_2550 | 1.186                | 0.935              | putative farnesyl pyrophosphate synthase                                                                     |
| 32  | cgd7_30   | 1.184                | 1.030              | large uncharacterized protein                                                                                |
| 33  | cgd8_4730 | 1.184                | 1.080              | DHHC family palmitoyl transferase with a signal peptide and 4 transmembrane domains                          |
| 34  | cgd5_4150 | 1.184                | 1.135              | hypothetical protein                                                                                         |
| 35  | cgd4_210  | 1.183                | 0.883              | Ubc1p like ubiquitin-conjugating enzyme E2 fused to a UBA domain (UBC+UBA)                                   |
| 36  | cgd1_1560 | 1.183                | 1.052              | domain KOG2577, transcription factor E2F/dimerization partner (TDP)                                          |
| 37  | cgd8_1660 | 1.183                | 1.027              | protein kinase                                                                                               |
| 38  | cgd7_5280 | 1.183                | 1.091              | structure-specific recognition protein 1 (SSRP1) (recombination signal sequence recognition protein)         |
| 39  | cgd1_1310 | 1.182                | 1.083              | cleavage stimulation factor subunit 2 that has a CSF1 like RRM domain                                        |
| 40  | cgd3_490  | 1.182                | 1.125              | putative fucose translocator with 8 transmembrane domains, within locus of 3 paralogous genes                |
| 41  | cgd2_310  | 1.182                | 1.162              | nucleoside transporter, 10 transmembrane domain domain, nucleoside binding domain                            |
| 42  | cgd1_470  | 1.182                | 0.949              | predicted secreted protein, signal peptide, low complexity serine-threonine rich, possible mucin             |
| 43  | cgd6_2650 | 1.182                | 0.956              | heat shock protein, putative                                                                                 |
| 44  | cgd1_1790 | 1.181                | 0.876              | RING-H2 finger containing membrane associated protein, 8x transmembrane domain                               |
| 45  | cgd2_4070 | 1.181                | 0.861              | hypothetical protein                                                                                         |
| 46  | cgd7_4910 | 1.180                | 1.085              | conserved 3 transmembrane domain membrane associated RING finger domain (shared by plants and apicomplexans) |
| 47  | cgd4_1700 | 1.180                | 1.035              | GNog1p. GTPase                                                                                               |
| 48  | cgd7_5480 | 1.180                | 1.029              | very large membrane protein                                                                                  |
| 49  | cgd4_3320 | 1.179                | 1.140              | Noc3 like protein involved in nuclear export of pre-ribosomes                                                |
| 50  | cgd8_2500 | 1.179                | 1.119              | hypothetical protein, signal peptide, membrane protein, transmembrane domain at C-terminus, paralogs         |
| 51  | cgd3_2670 | 1.179                | 1.073              | protein with UBC domain, ubiquitin conjugating enzyme E2                                                     |
| 52  | cgd3_3040 | 1.178                | 1.049              | protein kinase, cAMP-dependent, catalytic chain                                                              |
| 53  | cgd2_1780 | 1.178                | 0.903              | PDI like thioredoxin domain containing protein                                                               |
| 54  | cgd3_1600 | 1.178                | 0.890              | hypothetical protein with 4 transmembrane domains                                                            |
| 55  | cgd3_3670 | 1.177                | 1.056              | putative protein kinase CK2 regulatory subunit CK2B1                                                         |
| 56  | cgd7_2590 | 1.177                | 1.012              | integral membrane protein with 10 transmembrane domains                                                      |
| 57  | cgd4_3300 | 1.177                | 1.012              | artoculin family protein, adjacent paralogous gene                                                           |
| 58  | cgd2_2750 | 1.176                | 0.968              | SMC1 structural maintenance of chromosomes 1                                                                 |

|     |           |       |       |                                                                                                                                                            |
|-----|-----------|-------|-------|------------------------------------------------------------------------------------------------------------------------------------------------------------|
| 59  | cgd7_1760 | 1.176 | 1.141 | P-type ATPase (calcium/phospholipid-transporter), 9 transmembrane domains                                                                                  |
| 60  | cgd4_2300 | 1.176 | 1.149 | ubiquitin-activating enzyme E1 (UBA)                                                                                                                       |
| 61  | cgd2_1150 | 1.176 | 1.049 | hypothetical protein                                                                                                                                       |
| 62  | cgd5_2210 | 1.176 | 1.102 | 40S ribosomal protein S13                                                                                                                                  |
| 63  | cgd8_2670 | 1.175 | 1.044 | secreted glucose methanol choline like oxidoreductase of the FAD dependent oxidoreductase like fold, signal peptide                                        |
| 64  | cgd6_2040 | 1.174 | 1.016 | oligosaccharyl transferase STT3 protein                                                                                                                    |
| 65  | cgd5_1290 | 1.174 | 1.082 | membrane associated adenyl cyclase with 2 transmembrane regions and an adenyl cyclase domain                                                               |
| 66  | cgd5_2130 | 1.173 | 0.969 | chromatin associated proein with a chromodomain at the C-terminus                                                                                          |
| 67  | cgd7_2950 | 1.173 | 1.112 | phospholipid cytidyltransferase HIGH family                                                                                                                |
| 68  | cgd6_860  | 1.173 | 0.983 | hypothetical protein                                                                                                                                       |
| 69  | cgd6_2600 | 1.173 | 1.009 | hypothetical protein                                                                                                                                       |
| 70  | cgd4_4340 | 1.172 | 1.083 | diacylglycerol kinase                                                                                                                                      |
| 71  | cgd3_290  | 1.172 | 0.842 | hypothetical protein                                                                                                                                       |
| 72  | cgd6_1900 | 1.172 | 1.120 | kinesin heavy chain, putative                                                                                                                              |
| 73  | cgd8_2770 | 1.172 | 0.966 | SNF2L ortholog with a SWI/SNF2 like ATPase and a Myb domain                                                                                                |
| 74  | cgd6_4660 | 1.171 | 1.028 | possible apicomplexan-specific protein                                                                                                                     |
| 75  | cgd3_1260 | 1.171 | 1.178 | RING domain protein                                                                                                                                        |
| 76  | cgd1_2490 | 1.171 | 1.021 | proteasome subunit beta type 1, putative                                                                                                                   |
| 77  | cgd6_2570 | 1.171 | 1.032 | MORN domain repeat containing protein                                                                                                                      |
| 78  | cgd8_240  | 1.169 | 1.169 | hypothetical protein with 6 transmembrane domains                                                                                                          |
| 79  | cgd7_3810 | 1.169 | 1.033 | conserved hypothetical protein                                                                                                                             |
| 80  | cgd4_3880 | 1.169 | 0.988 | emap RNA binding domain protein (N terminal low complexity region)                                                                                         |
| 81  | cgd6_5180 | 1.168 | 1.047 | hypothetical protein having a transmembrane domain within N-terminus                                                                                       |
| 82  | cgd6_5260 | 1.167 | 0.923 | ABC transporter ATPase with 2 AAA domains                                                                                                                  |
| 83  | cgd1_1760 | 1.167 | 1.095 | Cdc50p like membrane protein, 2x transmembrane domains                                                                                                     |
| 84  | cgd2_1350 | 1.167 | 1.101 | 26S proteasome regulatory subunit, S6a like AAA ATPase                                                                                                     |
| 85  | cgd6_2440 | 1.166 | 0.968 | hypothetical protein having 6 transmembrane domains                                                                                                        |
| 86  | cgd2_2680 | 1.165 | 1.114 | possible MgtA, cation transport ATPase, signal peptide, 12 transmembrane domains                                                                           |
| 87  | cgd1_2260 | 1.165 | 1.073 | RNA polymerase II B8 subunit                                                                                                                               |
| 88  | cgd1_440  | 1.165 | 1.047 | hypothetical protein                                                                                                                                       |
| 89  | cgd3_2690 | 1.165 | 0.937 | DNAj domain, possible transmembrane domain                                                                                                                 |
| 90  | cgd2_3020 | 1.164 | 1.053 | hypothetical protein                                                                                                                                       |
| 91  | cgd3_250  | 1.164 | 0.992 | protein serine/threonine phosphatase alpha                                                                                                                 |
| 92  | cgd6_630  | 1.164 | 1.028 | conserved hypothetical protein                                                                                                                             |
| 93  | cgd5_1610 | 1.163 | 1.113 | hypothetical protein, possibly apicomplexan conserved                                                                                                      |
| 94  | cgd6_2720 | 1.163 | 0.994 | hypothetical protein having a signal peptide and transmembrane domain within C-terminus                                                                    |
| 95  | cgd2_3340 | 1.163 | 0.992 | Ser/Thr protein kinase                                                                                                                                     |
| 96  | cgd4_2990 | 1.162 | 1.140 | glycosyl transferase                                                                                                                                       |
| 97  | cgd6_1110 | 1.162 | 1.062 | signal peptide-containing protein                                                                                                                          |
| 98  | cgd8_2380 | 1.162 | 1.030 | CDC45 like protein, possible horizontal transfer                                                                                                           |
| 99  | cgd3_1640 | 1.161 | 1.156 | hypothetical protein with 7 transmembrane domains                                                                                                          |
| 100 | cgd3_680  | 1.160 | 0.959 | cathepsin like thiol protease possibly membrane associated, putative                                                                                       |
| 101 | cgd6_3510 | 1.159 | 1.158 | hypothetical protein                                                                                                                                       |
| 102 | cgd7_320  | 1.159 | 1.045 | putative 60S ribosomal protein L18A                                                                                                                        |
| 103 | cgd7_5010 | 1.159 | 1.031 | coatomer complex beta                                                                                                                                      |
| 104 | cgd5_3480 | 1.159 | 0.972 | hypothetical protein with possible conserved HGG motif                                                                                                     |
| 105 | cgd4_2560 | 1.159 | 0.958 | phospholipase C, delta 1 ortholog with 2 EF hands plus phospholipase C domain plus C2 domain                                                               |
| 106 | cgd3_4100 | 1.159 | 0.962 | conserved protein, COG SSU ribosomal protein S8E                                                                                                           |
| 107 | cgd3_3800 | 1.158 | 1.000 | hypothetical protein                                                                                                                                       |
| 108 | cgd6_70   | 1.158 | 1.050 | conserved hypothetical protein                                                                                                                             |
| 109 | cgd6_5310 | 1.158 | 1.079 | hypothetical protein with signal peptide                                                                                                                   |
| 110 | cgd6_3830 | 1.158 | 1.018 | rab1a protein, putative                                                                                                                                    |
| 111 | cgd1_1830 | 1.158 | 0.885 | TB2/DP1/HVA22 family integral membrane protein that may be involved in membrane trafficking, 3x transmembrane domains                                      |
| 112 | cgd7_2170 | 1.158 | 1.091 | hypothetical membrane protein                                                                                                                              |
| 113 | cgd3_1650 | 1.158 | 1.144 | eIF2G GTPase. eukaryotic translation initiation factor 2 gamma subunit (ZnR+GTPase)                                                                        |
| 114 | cgd7_310  | 1.157 | 0.905 | conserved hypothetical protein                                                                                                                             |
| 115 | cgd7_3290 | 1.157 | 1.132 | cleft lip and palate family of eukaryotic membrane proteins (potential transporters) with 9 transmembrane domains                                          |
| 116 | cgd1_230  | 1.157 | 1.140 | ALG-2 like alpha-1,3 mannosyltransferase                                                                                                                   |
| 117 | cgd6_840  | 1.156 | 0.908 | shanti/Ykl100cp/Minor histocompatibility antigen H13-like; presenilin, signal peptide peptidase family, with 10 transmembrane domains and a signal peptide |
| 118 | cgd7_2090 | 1.156 | 1.107 | Ruv DNA-helicase-related protein                                                                                                                           |
| 119 | cgd7_5050 | 1.155 | 1.036 | NIMA-related kinase 5                                                                                                                                      |
| 120 | cgd7_1570 | 1.155 | 0.944 | hypothetical protein                                                                                                                                       |
| 121 | cgd8_4640 | 1.155 | 1.130 | WD40 repeat                                                                                                                                                |



|     |           |       |       |                                                                                                                         |
|-----|-----------|-------|-------|-------------------------------------------------------------------------------------------------------------------------|
| 122 | cgd6_3290 | 1.155 | 1.058 | DNA-directed RNA polymerase III C1 subunit                                                                              |
| 123 | cgd4_2360 | 1.155 | 1.045 | DSK2 like protein with a ubiquitin domain, 2 ST1 motifs and a UBA domain at its C-terminus                              |
| 124 | cgd7_3600 | 1.154 | 0.803 | Hs17p, histone methylase                                                                                                |
| 125 | cgd8_4620 | 1.154 | 0.922 | ISWI related chromatinic protein with an apicomplexan specific domain architecture composed of 3x PHD+SNF2 ATPase+2xPHD |
| 126 | cgd8_150  | 1.154 | 1.166 | CpTSP4; extracellular protien with signal peptide and 2 repeats of an apple domain followed by a TSP1 domain            |
| 127 | cgd3_1550 | 1.153 | 1.020 | sec14 domain containing protein                                                                                         |
| 128 | cgd8_890  | 1.153 | 0.819 | CobW/nitrile hydratase activator like P-loop ATPase                                                                     |
| 129 | cgd2_2480 | 1.152 | 1.100 | methionine aminopeptidase, type II, putative , an1 domain                                                               |
| 130 | cgd5_3830 | 1.151 | 0.962 | hypothetical protein                                                                                                    |
| 131 | cgd4_4020 | 1.150 | 1.093 | 40S ribosomal protein S2/S5. DSRBD RNA binding domain                                                                   |
| 132 | cgd1_880  | 1.150 | 1.049 | eukaryotic initiation factor 4A (eIF4A) (eIF-4A)                                                                        |
| 133 | cgd8_4710 | 1.150 | 1.122 | hypothetical protein                                                                                                    |
| 134 | cgd5_2340 | 1.150 | 0.999 | possible SET domain containing protein                                                                                  |
| 135 | cgd7_4100 | 1.150 | 1.049 | Ssm4 ring finger fused to a forkhead associated (FHA) domain (apicomplexan specific architecture)                       |
| 136 | cgd3_2090 | 1.150 | 1.029 | 40S ribosomal protein SAe                                                                                               |
| 137 | cgd8_3740 | 1.150 | 0.990 | Yer119cp like amino acid transporter, 11 transmembrane domain                                                           |
| 138 | cgd8_3160 | 1.150 | 0.866 | hypothetical protein                                                                                                    |
| 139 | cgd8_5300 | 1.150 | 0.978 | signal peptide containing protein                                                                                       |
| 140 | cgd2_4180 | 1.149 | 0.980 | hypothetical protein                                                                                                    |
| 141 | cgd1_2760 | 1.148 | 1.029 | yyaF/YCHF TRANSFAC/OBG family small GTPase plus RNA binding domain TGS                                                  |
| 142 | cgd2_1020 | 1.148 | 1.038 | proteasome regulatory subunit Rpn9, PINT domain                                                                         |
| 143 | cgd1_730  | 1.148 | 0.894 | glutamine cyclotransferase, predicted bacterial/plant origin                                                            |
| 144 | cgd8_4720 | 1.147 | 1.029 | seryl-tRNA synthetase, cytoplasmic                                                                                      |
| 145 | cgd6_200  | 1.147 | 1.124 | oocyst wall protein 8                                                                                                   |
| 146 | cgd7_1170 | 1.146 | 0.984 | protein containing ringfinger+4xC2H2+littlefinger domains                                                               |
| 147 | cgd7_2850 | 1.145 | 1.197 | cathepsin like thiol protease possibly membrane associated                                                              |
| 148 | cgd7_3640 | 1.145 | 1.035 | YjeF family of predicted nucleotide binding proteins                                                                    |
| 149 | cgd2_2880 | 1.144 | 0.830 | WD-40 repeat protein, putative                                                                                          |
| 150 | cgd4_2120 | 1.143 | 0.938 | PX domain containing protein                                                                                            |
| 151 | cgd6_3570 | 1.143 | 0.804 | myotubularin related protein 1, C-terminus protein tyrosine/serine phosphatase, catalytic domain                        |
| 152 | cgd3_2530 | 1.143 | 1.051 | PUP1/proteasome subunit beta type 7, NTN hydrolase fold                                                                 |
| 153 | cgd5_1540 | 1.143 | 1.007 | conserved hypothetical protein                                                                                          |
| 154 | cgd2_3710 | 1.143 | 1.136 | Pfa MAL6P1.309 like protein                                                                                             |
| 155 | cgd8_1650 | 1.142 | 1.000 | partner of Nob1; Pno1p; Yor145cp like KH domain containing protein                                                      |
| 156 | cgd8_3640 | 1.141 | 1.105 | niemann-Pick type C1 disease protein/ patched like cholesterol transporter of the SecD family, 12 transmembrane domain  |
| 157 | cgd6_4920 | 1.141 | 1.079 | hypothetical protein with 4 transmembrane domains                                                                       |
| 158 | cgd4_2370 | 1.141 | 0.968 | lysyl-tRNA synthetase (NOB+tRNA synthetase)                                                                             |
| 159 | cgd1_850  | 1.141 | 1.155 | 40S ribosomal protein S19                                                                                               |
| 160 | cgd8_2470 | 1.140 | 1.092 | hypothetical protein, signal peptide, 4 transmembrane domains                                                           |
| 161 | cgd3_2410 | 1.140 | 1.182 | ubiquitin-fusion degadation-2 (UFD2) family protein with a UBOX at the C-terminus                                       |
| 162 | cgd2_980  | 1.140 | 1.149 | putative DNA-directed RNA polymerase 2                                                                                  |
| 163 | cgd7_5090 | 1.140 | 1.100 | SET domain protein with MYND insert (Skm/BOP family)                                                                    |
| 164 | cgd3_600  | 1.140 | 0.871 | hypothetical protein, signal peptide                                                                                    |
| 165 | cgd5_1600 | 1.139 | 1.157 | translation initiation factor if-2B beta; eIF-2                                                                         |
| 166 | cgd7_3130 | 1.139 | 0.988 | ER vesicle protein; Erv41p, transmembrane region near C terminus and possible N region transmembrane                    |
| 167 | cgd4_3210 | 1.139 | 1.160 | hypothetical protein                                                                                                    |
| 168 | cgd6_4500 | 1.139 | 1.148 | hypothetical low complexity multi-pass transmembrane protein                                                            |
| 169 | cgd3_3020 | 1.139 | 1.055 | possible guaning nucleotide exchange factor, eIF-2B                                                                     |
| 170 | cgd8_3730 | 1.138 | 1.012 | conserved hypothetical protein                                                                                          |
| 171 | cgd5_2440 | 1.137 | 1.091 | Ylr401cp-like protein with 2 CCCH domains plus Dus1p tRNA dihydrouridine synthase Tim barrel                            |
| 172 | cgd7_5330 | 1.137 | 1.182 | thioredoxin/PDI, cyanobacterial type, signal peptide plus 4 transmembrane domains                                       |
| 173 | cgd5_3740 | 1.137 | 0.956 | 40S ribosomal protein S12. pelota RNA binding domain containing protein                                                 |
| 174 | cgd6_570  | 1.136 | 1.067 | 60S ribosomal protein L23                                                                                               |
| 175 | cgd7_1960 | 1.136 | 0.971 | membrane protein with multiple cysteines at the N-terminus.                                                             |
| 176 | cgd2_4380 | 1.136 | 1.018 | signal peptide, repeats, gene anchored to telomere                                                                      |
| 177 | cgd1_3640 | 1.136 | 1.032 | hypothetical protein, signal peptide                                                                                    |
| 178 | cgd8_4660 | 1.135 | 1.022 | hypothetical protein, signal peptide                                                                                    |
| 179 | cgd8_3690 | 1.135 | 1.074 | mitosis protein DIM1                                                                                                    |
| 180 | cgd1_1980 | 1.135 | 1.070 | protein geranyl-geranyltransferase beta subunit                                                                         |
| 181 | cgd5_1200 | 1.135 | 1.017 | ring finger and bbox containing protein, putative                                                                       |
| 182 | cgd2_3410 | 1.134 | 1.095 | ARF1/2 like small GTPase, putative                                                                                      |
| 183 | cgd3_3050 | 1.134 | 1.087 | hypothetical protein                                                                                                    |
| 184 | cgd4_4330 | 1.133 | 0.951 | hypothetical protein                                                                                                    |

|     |           |       |       |                                                                                                                        |
|-----|-----------|-------|-------|------------------------------------------------------------------------------------------------------------------------|
| 185 | cgd1_3390 | 1.133 | 1.192 | katanin p60/fidgetin family AAA ATPase                                                                                 |
| 186 | cgd7_5250 | 1.133 | 1.092 | methyltransfer with N-terminal ankyrin repeats                                                                         |
| 187 | cgd4_740  | 1.133 | 1.080 | thioredoxin peroxidase-like protein                                                                                    |
| 188 | cgd6_3640 | 1.133 | 1.048 | protein disulfide isomerase ; secreted protein with thioredoxin, signal peptide plus ER retention motif                |
| 189 | cgd7_3010 | 1.132 | 1.142 | cysteine-rich protein                                                                                                  |
| 190 | cgd1_2270 | 1.132 | 1.021 | 40S ribosomal protein S26                                                                                              |
| 191 | cgd8_220  | 1.132 | 1.070 | ubiquitin-conjugating enzyme e2                                                                                        |
| 192 | cgd6_5350 | 1.132 | 0.921 | putative ABC transporter protein                                                                                       |
| 193 | cgd4_2520 | 1.132 | 1.042 | hypothetical protein with a signal peptide, gene within locus of signal-peptide containing hypothetical proteins       |
| 194 | cgd4_1950 | 1.132 | 0.977 | RPR46-like RNase PH domain                                                                                             |
| 195 | cgd1_1670 | 1.131 | 1.121 | bystin/ S.cerevisiae En1p like adaptor domain                                                                          |
| 196 | cgd5_3630 | 1.131 | 0.881 | thymidylate kinase                                                                                                     |
| 197 | cgd7_5180 | 1.130 | 1.153 | eIF3 gamma/P40 with JAB/PAD domains; translation initiation factor IF-3 subunit 3                                      |
| 198 | cgd5_1890 | 1.130 | 1.110 | hypothetical protein                                                                                                   |
| 199 | cgd3_4250 | 1.130 | 1.173 | secreted insulinase like peptidase, signal peptide                                                                     |
| 200 | cgd4_2070 | 1.129 | 0.922 | cyclin B like                                                                                                          |
| 201 | cgd2_940  | 1.129 | 0.985 | signal peptide plus transmembrane domain or GPI anchor                                                                 |
| 202 | cgd8_440  | 1.129 | 1.071 | 60S ribosomal protein L5                                                                                               |
| 203 | cgd1_2780 | 1.129 | 1.068 | hypothetical protein, 4 transmembrane domains                                                                          |
| 204 | cgd2_2570 | 1.127 | 1.157 | hypothetical protein, possible signal peptide                                                                          |
| 205 | cgd2_2350 | 1.127 | 0.998 | MA3 domain containing protein                                                                                          |
| 206 | cgd8_3060 | 1.127 | 1.072 | adaptin AP complex subunit alpha                                                                                       |
| 207 | cgd7_2860 | 1.126 | 1.119 | uncharacterized protein with predicted coiled coil regions                                                             |
| 208 | cgd2_380  | 1.125 | 0.851 | COG0237: dephospho-CoA kinase                                                                                          |
| 209 | cgd2_2940 | 1.125 | 0.959 | conserved hypothetical protein                                                                                         |
| 210 | cgd7_3720 | 1.125 | 0.985 | RNA polymerase beta subunit                                                                                            |
| 211 | cgd1_980  | 1.125 | 1.074 | RNase L inhibitor-like protein                                                                                         |
| 212 | cgd4_3030 | 1.125 | 1.062 | hypothetical protein with a signal peptide                                                                             |
| 213 | cgd6_2870 | 1.122 | 1.068 | hypothetical protein                                                                                                   |
| 214 | cgd1_2130 | 1.121 | 0.960 | glutaminyl-tRNA synthetase, of predicted bacterial origin                                                              |
| 215 | cgd8_200  | 1.121 | 0.853 | hypothetical protein                                                                                                   |
| 216 | cgd8_3840 | 1.121 | 1.085 | hypothetical protein                                                                                                   |
| 217 | cgd3_4270 | 1.120 | 1.056 | peptidase'insulinase like peptidase'                                                                                   |
| 218 | cgd6_1990 | 1.120 | 0.991 | hypothetical protein with signal peptide                                                                               |
| 219 | cgd7_1450 | 1.120 | 1.062 | hypothetical protein                                                                                                   |
| 220 | cgd1_3030 | 1.120 | 1.071 | hypothetical protein containing WD40 repeats fused to a RING finger                                                    |
| 221 | cgd5_1190 | 1.119 | 0.956 | nucleolar protein NOP4; rrm domain containing protein                                                                  |
| 222 | cgd1_2570 | 1.119 | 0.925 | possible conserved eukaryotic alpha beta hydrolase                                                                     |
| 223 | cgd4_460  | 1.119 | 0.976 | hypothetical protein                                                                                                   |
| 224 | cgd8_5070 | 1.119 | 1.199 | hypothetical protein                                                                                                   |
| 225 | cgd2_900  | 1.118 | 1.054 | putative T complex chaperonin                                                                                          |
| 226 | cgd8_4160 | 1.118 | 0.970 | hypothetical protein, transmembrane domain                                                                             |
| 227 | cgd5_40   | 1.118 | 0.871 | signal peptide containing large protein with proline stretches                                                         |
| 228 | cgd4_1970 | 1.118 | 1.196 | protein with central transmembrane domain followed by gly-met-pro repeat                                               |
| 229 | cgd1_1450 | 1.117 | 1.150 | predicted secreted protein, signal peptide                                                                             |
| 230 | cgd7_5410 | 1.117 | 0.930 | WD40 protein                                                                                                           |
| 231 | cgd3_3750 | 1.117 | 1.023 | multiprotein bridging factor type 1 like transcriptional co-activator                                                  |
| 232 | cgd5_2010 | 1.116 | 0.996 | nuclear VCP like protein with 2 AAA ATPase domains                                                                     |
| 233 | cgd8_4420 | 1.115 | 1.086 | WD40 repeat and RING finger domain-containing protein                                                                  |
| 234 | cgd1_910  | 1.115 | 1.078 | ZnF A20 and Znf AN1 domains, involved in signaling                                                                     |
| 235 | cgd3_3100 | 1.115 | 1.125 | 12 transmembrane domain protein MFS family sugar transporter                                                           |
| 236 | cgd7_5360 | 1.115 | 1.142 | uncharacterized protein                                                                                                |
| 237 | cgd1_3860 | 1.115 | 1.041 | hypothetical protein                                                                                                   |
| 238 | cgd2_1740 | 1.114 | 1.090 | RSC8 ortholog with a swirm domain, ZZ finger and Myb                                                                   |
| 239 | cgd5_1080 | 1.114 | 1.047 | hypothetical protein                                                                                                   |
| 240 | cgd6_5400 | 1.114 | 0.995 | protein with signal peptide plus thr stretch, cys rich, possible mucin                                                 |
| 241 | cgd1_3820 | 1.114 | 0.953 | hypothetical protein, transmembrane domain or GPI anchor near C-terminus                                               |
| 242 | cgd4_1220 | 1.114 | 1.150 | conserved hypothetical protein                                                                                         |
| 243 | cgd7_450  | 1.113 | 1.179 | putative cytidine diphosphate-diaclylglycerol synthase; integral membrane protein with 7 or more transmembrane domains |
| 244 | cgd8_1050 | 1.113 | 1.118 | hypothetical protein                                                                                                   |
| 245 | cgd8_2000 | 1.113 | 1.102 | KRE33p like superfamily I ATPase fused to an acetylase                                                                 |
| 246 | cgd1_1300 | 1.113 | 0.978 | spindly like TPR repeats, predicted plant origin                                                                       |
| 247 | cgd6_5440 | 1.112 | 1.115 | hypothetical protein, signal peptide, paralogs                                                                         |
| 248 | cgd4_1940 | 1.112 | 1.099 | putative nucleoside-diphosphate kinase                                                                                 |
| 249 | cgd7_3540 | 1.112 | 1.052 | conserved hypothetical protein                                                                                         |

|     |           |       |       |                                                                                                            |
|-----|-----------|-------|-------|------------------------------------------------------------------------------------------------------------|
| 250 | cgd8_2490 | 1.111 | 1.044 | conserved hypothetical protein                                                                             |
| 251 | cgd1_3420 | 1.110 | 0.951 | conserved possible MUS81 endonuclease                                                                      |
| 252 | cgd8_1860 | 1.110 | 1.070 | LisH domain at N + WD40 repeats                                                                            |
| 253 | cgd7_4270 | 1.110 | 1.025 | glycolytic phosphoglycerate mutase                                                                         |
| 254 | cgd4_2870 | 1.110 | 1.120 | putative sugar transporter, 12x transmembrane domain protein                                               |
| 255 | cgd1_110  | 1.110 | 1.051 | predicted secreted protein, signal peptide, paralogs                                                       |
| 256 | cgd8_2980 | 1.110 | 0.952 | hypothetical protein                                                                                       |
| 257 | cgd7_3820 | 1.110 | 1.050 | conserved hypothetical protein                                                                             |
| 258 | cgd7_5000 | 1.110 | 0.961 | vacuolar ATP synthase subunit A                                                                            |
| 259 | cgd8_80   | 1.110 | 1.182 | 10 transmembrane domain, possible aa transporter                                                           |
| 260 | cgd3_4180 | 1.109 | 1.080 | secreted insulinase like peptidase                                                                         |
| 261 | cgd2_1450 | 1.109 | 1.197 | major facilitator superfamily protein, putative, 12 transmembrane domain                                   |
| 262 | cgd8_350  | 1.109 | 1.145 | asparaginyl-tRNA synthetase (NOB+tRNA synthase)                                                            |
| 263 | cgd6_3740 | 1.109 | 0.959 | 41-2 protein antigen precursor                                                                             |
| 264 | cgd4_680  | 1.109 | 0.965 | hypothetical protein                                                                                       |
| 265 | cgd7_5520 | 1.108 | 0.931 | serine/threonine rich low complexity protein                                                               |
| 266 | cgd1_1970 | 1.108 | 1.180 | hypothetical protein                                                                                       |
| 267 | cgd8_3890 | 1.108 | 1.097 | membrane protein with signal peptide plus 12x transmembrane domains                                        |
| 268 | cgd6_1520 | 1.108 | 0.957 | 2-methylthioadenine synthetase; MiaB                                                                       |
| 269 | cgd8_3490 | 1.108 | 1.066 | hypothetical protein                                                                                       |
| 270 | cgd3_470  | 1.107 | 1.131 | hypothetical protein with 10 transmembrane domains                                                         |
| 271 | cgd8_1600 | 1.107 | 0.965 | sugar phosphate permease with 11 transmembrane domains                                                     |
| 272 | cgd3_3780 | 1.107 | 0.852 | hypothetical protein                                                                                       |
| 273 | cgd3_3920 | 1.106 | 1.067 | DEAD/DEAH box ATP-dependent RNA helicase, putative                                                         |
| 274 | cgd2_2530 | 1.106 | 1.000 | hypothetical protein, signal peptide                                                                       |
| 275 | cgd5_2150 | 1.106 | 1.185 | protein with signal peptide and 8 transmembrane domains; possible ZIP zinc transporter family member       |
| 276 | cgd6_3990 | 1.106 | 1.072 | elongation factor 1 alpha                                                                                  |
| 277 | cgd7_3250 | 1.105 | 1.153 | membrane protein with no close homologs,                                                                   |
| 278 | cgd2_3210 | 1.105 | 1.188 | hypothetical protein                                                                                       |
| 279 | cgd8_190  | 1.104 | 0.940 | Mak5 pre-mRNA splicing RNA SFII helicase                                                                   |
| 280 | cgd5_2200 | 1.104 | 1.033 | T8M16_190-plant like protein with RRM domain                                                               |
| 281 | cgd7_4250 | 1.104 | 1.070 | RNA pol II carboxy terminal domain phosphatase of the HAD superfamily with a BRCT domain at the C-terminus |
| 282 | cgd6_390  | 1.104 | 0.805 | hypothetical protein                                                                                       |
| 283 | cgd7_3670 | 1.103 | 1.034 | heat shock protein 90 (Hsp90), signal peptide plus ER retention motif                                      |
| 284 | cgd3_2180 | 1.103 | 0.946 | type I fatty acid synthase                                                                                 |
| 285 | cgd8_3800 | 1.102 | 1.097 | hypothetical protein                                                                                       |
| 286 | cgd8_4630 | 1.102 | 1.137 | 7 pass integral membrane protein with FLHWFHH motif shared with fatty-acyl elongase                        |
| 287 | cgd5_2450 | 1.102 | 1.188 | hypothetical protein                                                                                       |
| 288 | cgd7_230  | 1.102 | 1.080 | RPR45-like archaeo-eukaryotic exosomal RNase PH                                                            |
| 289 | cgd4_880  | 1.101 | 1.031 | ADA2 ortholog with a ZZ finger, SANT domain and a SWIRM domain                                             |
| 290 | cgd1_3250 | 1.101 | 0.953 | signal peptide, possible transmembrane domain near N-terminus, proline rich and His-stretch at C-terminus  |
| 291 | cgd6_2240 | 1.100 | 1.106 | protein with N-terminal apicomplexan-specific globular domain plus PHD domain                              |
| 292 | cgd8_1840 | 1.100 | 1.131 | 40S ribosomal subunit protein S9, putative                                                                 |
| 293 | cgd2_1060 | 1.099 | 1.101 | calcium/calmodulin dependent protein kinase with a kinas domain and 4 calmodulin-like EF hands             |
| 294 | cgd3_750  | 1.099 | 1.009 | hypothetical protein                                                                                       |
| 295 | cgd5_1560 | 1.099 | 0.995 | hypothetical protein, 2 transmembrane domains near C-terminus                                              |
| 296 | cgd2_1820 | 1.098 | 1.040 | hypothetical protein                                                                                       |
| 297 | cgd8_600  | 1.098 | 0.917 | secreted alpha/beta hydrolase superfamily protein                                                          |
| 298 | cgd8_3830 | 1.098 | 1.122 | hypothetical protein                                                                                       |
| 299 | cgd6_560  | 1.097 | 1.151 | alanyl-tRNA synthetase (with HxxxH domain)                                                                 |
| 300 | cgd1_1480 | 1.097 | 1.142 | predicted membrane associated protein, 4 transmembrane domains and signal peptide                          |
| 301 | cgd5_4280 | 1.097 | 1.188 | hypothetical protein with signal peptide and possible transmembrane region at C-terminus                   |
| 302 | cgd7_5100 | 1.096 | 1.190 | protein disulfide isomerase, signal peptide plus ER retention motif                                        |
| 303 | cgd8_3350 | 1.096 | 0.905 | oocyst wall protein 4                                                                                      |
| 304 | cgd4_3150 | 1.096 | 1.055 | cullin-like protein of probable plant origin                                                               |
| 305 | cgd6_2880 | 1.096 | 1.169 | hypothetical protein                                                                                       |
| 306 | cgd8_5200 | 1.096 | 1.118 | 5 transmembrane domain protein                                                                             |
| 307 | cgd2_3080 | 1.095 | 1.086 | CpTSP10 protein                                                                                            |
| 308 | cgd8_530  | 1.095 | 0.984 | hypothetical protein with 4 transmembrane domains                                                          |
| 309 | cgd4_2910 | 1.094 | 1.020 | aminopeptidase                                                                                             |
| 310 | cgd8_4800 | 1.094 | 1.123 | SSM4 like ring finger with a forkhead associated (FHA) domain (apicomplexan-specific architecture)         |
| 311 | cgd2_780  | 1.093 | 1.073 | hypothetical protein                                                                                       |
| 312 | cgd4_3220 | 1.093 | 1.116 | histone H3                                                                                                 |
| 313 | cgd7_1510 | 1.093 | 0.877 | hypothetical protein                                                                                       |

|     |           |       |       |                                                                                                                        |
|-----|-----------|-------|-------|------------------------------------------------------------------------------------------------------------------------|
| 314 | cgd1_2730 | 1.092 | 0.961 | Ro ribonucleoprotein-binding protein 1, RNA binding protein with 3x RRM domains                                        |
| 315 | cgd7_4080 | 1.092 | 1.137 | protein disulfide isomerase, signal peptide, ER retention motif                                                        |
| 316 | cgd6_3130 | 1.092 | 0.988 | hypothetical protein                                                                                                   |
| 317 | cgd5_3040 | 1.091 | 1.022 | 40S ribosomal protein S7                                                                                               |
| 318 | cgd2_330  | 1.091 | 1.069 | notchless                                                                                                              |
| 319 | cgd7_5020 | 1.090 | 0.990 | ubiquitin family protein                                                                                               |
| 320 | cgd7_1370 | 1.090 | 1.055 | hypothetical protein                                                                                                   |
| 321 | cgd2_4350 | 1.090 | 1.134 | putative patched family protein with 12 transmembrane domain                                                           |
| 322 | cgd7_2250 | 1.090 | 1.045 | 40S ribosomal protein S3, KH domain                                                                                    |
| 323 | cgd3_200  | 1.090 | 0.972 | zfwd1 protein, CCCH like RNA binding domain fused to WD repeats                                                        |
| 324 | cgd3_2160 | 1.090 | 0.804 | SprT like metalloprotease                                                                                              |
| 325 | cgd2_1030 | 1.090 | 1.070 | mitochondrial carrier protein, putative                                                                                |
| 326 | cgd2_1850 | 1.089 | 1.048 | stress-induced protein sti1-like protein, putative                                                                     |
| 327 | cgd3_780  | 1.089 | 1.020 | hypothetical protein                                                                                                   |
| 328 | cgd2_3750 | 1.089 | 1.067 | hypothetical protein, transmembrane domain near C-terminus                                                             |
| 329 | cgd3_4140 | 1.089 | 1.076 | P-type ATPase3, 13 transmembrane regions                                                                               |
| 330 | cgd2_290  | 1.088 | 1.194 | hypothetical protein                                                                                                   |
| 331 | cgd5_1370 | 1.088 | 1.010 | hypothetical protein                                                                                                   |
| 332 | cgd7_90   | 1.088 | 1.079 | high affinity sulfate transporter-related                                                                              |
| 333 | cgd1_1940 | 1.088 | 0.933 | possible RAN guanine nucleotide release factor                                                                         |
| 334 | cgd8_2080 | 1.087 | 0.928 | conserved hypothetical protein                                                                                         |
| 335 | cgd8_3000 | 1.087 | 1.064 | SYG1/ ERD1 like integral membrane protein required for retention of ER lumen proteins, with 8-10 transmembrane domains |
| 336 | cgd3_540  | 1.087 | 1.108 | protein with 12 transmembrane domains                                                                                  |
| 337 | cgd5_810  | 1.086 | 1.040 | leucine-rich repeat protein                                                                                            |
| 338 | cgd6_2490 | 1.086 | 1.076 | e3 ubiquitin-protein ligase, putative                                                                                  |
| 339 | cgd6_5270 | 1.086 | 0.856 | hypothetical protein with possible signal peptide                                                                      |
| 340 | cgd8_930  | 1.085 | 1.179 | RBX1 ortholog, RING finger                                                                                             |
| 341 | cgd6_2380 | 1.085 | 0.876 | mRNA capping enzyme; RNA guanylyltransferase Ceg1p                                                                     |
| 342 | cgd3_1120 | 1.085 | 0.912 | SNAPc like transcription factor with 4 MYB/SANT domains                                                                |
| 343 | cgd7_200  | 1.085 | 0.995 | hypothetical protein with signal peptide                                                                               |
| 344 | cgd7_60   | 1.085 | 1.018 | Hat1-like acetyltransferase (histone acetyltransferase-like)                                                           |
| 345 | cgd1_830  | 1.085 | 1.073 | sen1p/ NAM7 like superfamily I RNA helicase                                                                            |
| 346 | cgd3_430  | 1.084 | 0.940 | VPS13p like protein involved in vacuolar sorting                                                                       |
| 347 | cgd7_1920 | 1.084 | 1.092 | hypothetical protein                                                                                                   |
| 348 | cgd5_180  | 1.083 | 0.838 | hypothetical protein with signal peptide                                                                               |
| 349 | cgd3_2360 | 1.083 | 1.122 | putative nucleoporin, FG-rich motifs within N-terminal region                                                          |
| 350 | cgd7_3620 | 1.083 | 1.097 | PP2C phosphatase                                                                                                       |
| 351 | cgd7_1120 | 1.083 | 1.050 | 3CCCH domain containing protein                                                                                        |
| 352 | cgd2_2230 | 1.082 | 1.052 | conserved hypothetical protein                                                                                         |
| 353 | cgd8_3470 | 1.082 | 1.052 | membrane associated protein with a RING finger, 4xtransmembrane domain                                                 |
| 354 | cgd5_690  | 1.082 | 1.109 | extracellular protein with a ricin domain and a family 2 glycosyltransferase domain                                    |
| 355 | cgd8_2340 | 1.082 | 1.030 | cold shock RNA binding domain of the OB fold                                                                           |
| 356 | cgd2_2070 | 1.082 | 1.024 | translation elongation factor EF-1, subunit alpha, putative                                                            |
| 357 | cgd7_1280 | 1.081 | 0.949 | hypothetical protein                                                                                                   |
| 358 | cgd3_210  | 1.081 | 0.968 | hypothetical protein                                                                                                   |
| 359 | cgd7_5190 | 1.081 | 1.198 | uncharacterized protein with coiled coil regions                                                                       |
| 360 | cgd8_1960 | 1.081 | 0.887 | hypothetical protein                                                                                                   |
| 361 | cgd7_1580 | 1.080 | 0.825 | mb1 domain containing protein                                                                                          |
| 362 | cgd1_3530 | 1.080 | 1.051 | Gbp1/Gbp2p-like, putative single stranded G-strand telomeric DNA-binding protein                                       |
| 363 | cgd6_580  | 1.079 | 1.093 | inactive CPSFs Cft2p metallo-beta-lactamase                                                                            |
| 364 | cgd5_750  | 1.079 | 1.127 | Mdh; malate dehydrogenase (oxaloacetate-decarboxylating)(NADP+)                                                        |
| 365 | cgd7_3020 | 1.079 | 1.135 | rhomboid family membrane associated protease, 7 transmembrane domain                                                   |
| 366 | cgd8_1820 | 1.079 | 0.953 | ATP-dependent RNA helicase, putative                                                                                   |
| 367 | cgd5_1850 | 1.078 | 1.105 | GPI1/PIG-Q like N-acetylglucosaminyl-phosphatidylinositol transferase involved in GPI anchor biosynthesis              |
| 368 | cgd6_1210 | 1.078 | 1.034 | hypothetical protein                                                                                                   |
| 369 | cgd7_3100 | 1.078 | 1.099 | conserved hypothetical protein                                                                                         |
| 370 | cgd7_210  | 1.078 | 0.933 | fkbp                                                                                                                   |
| 371 | cgd5_2180 | 1.077 | 0.873 | large low complexity protein with proline/alanine-rich repeat                                                          |
| 372 | cgd4_3460 | 1.077 | 1.063 | hypothetical protein with signal peptide, within large locus of signal peptide containing proteins                     |
| 373 | cgd3_2190 | 1.077 | 0.964 | ubiquitin domain containing protein with a UBA domain at the C-terminus                                                |
| 374 | cgd7_2910 | 1.076 | 0.811 | Abd1p; RNA (guanine-7-methyltransferase (cap methyltransferase)                                                        |
| 375 | cgd8_2120 | 1.076 | 0.965 | hypothetical protein                                                                                                   |
| 376 | cgd7_120  | 1.076 | 1.099 | cAMP-dependent protein kinase regulatory subunit                                                                       |
| 377 | cgd2_360  | 1.076 | 1.071 | prtip-like IF39 eukaryotic translation initiation factor 3                                                             |
| 378 | cgd4_3570 | 1.073 | 1.043 | conserved hypothetical protein                                                                                         |

|     |           |       |       |                                                                                                                                     |
|-----|-----------|-------|-------|-------------------------------------------------------------------------------------------------------------------------------------|
| 379 | cgd4_4490 | 1.073 | 1.152 | conserved hypothetical protein                                                                                                      |
| 380 | cgd8_3770 | 1.073 | 1.069 | DNAJ like chaperone                                                                                                                 |
| 381 | cgd8_570  | 1.072 | 0.842 | proteasome regulatory subunit S2 (RPN1)                                                                                             |
| 382 | cgd3_1880 | 1.072 | 1.164 | protein with 2x rrm domains                                                                                                         |
| 383 | cgd3_3770 | 1.072 | 1.023 | Hsp90                                                                                                                               |
| 384 | cgd5_1140 | 1.072 | 0.893 | cinnamyl-alcohol dehydrogenase-like nucleoside diphosphate sugar epimerase                                                          |
| 385 | cgd7_110  | 1.071 | 1.122 | putative sortilin, SMART_VSP10 domain, possible signal peptide                                                                      |
| 386 | cgd5_3170 | 1.071 | 0.951 | histone H2B                                                                                                                         |
| 387 | cgd7_2800 | 1.071 | 0.914 | ubiquitin-conjugating enzyme E2, putative                                                                                           |
| 388 | cgd4_4410 | 1.070 | 0.921 | 2x PHD domain containing protein                                                                                                    |
| 389 | cgd4_2020 | 1.070 | 1.110 | conserved hypothetical protein                                                                                                      |
| 390 | cgd3_480  | 1.070 | 1.120 | hypothetical protein with a signal peptide                                                                                          |
| 391 | cgd3_2260 | 1.069 | 1.048 | hypothetical protein                                                                                                                |
| 392 | cgd2_990  | 1.069 | 1.035 | queuine tRNA-guanine transglycosylase                                                                                               |
| 393 | cgd8_3750 | 1.068 | 1.048 | predicted secreted protein                                                                                                          |
| 394 | cgd5_900  | 1.066 | 1.116 | MRP like MinD family ATPase                                                                                                         |
| 395 | cgd1_3750 | 1.065 | 1.001 | conserved hypothetical protein                                                                                                      |
| 396 | cgd5_1430 | 1.064 | 0.832 | hypothetical protein                                                                                                                |
| 397 | cgd3_980  | 1.064 | 1.070 | hypothetical protein                                                                                                                |
| 398 | cgd1_2000 | 1.063 | 0.995 | predicted coiled coil protein                                                                                                       |
| 399 | cgd7_2920 | 1.063 | 1.147 | DNA replication licensing factor MCM5 like AAA+ ATPase                                                                              |
| 400 | cgd8_2370 | 1.063 | 1.121 | adenosine kinase like ribokinase                                                                                                    |
| 401 | cgd2_1870 | 1.062 | 1.084 | guanine nucleotide-binding protein, putative                                                                                        |
| 402 | cgd8_1770 | 1.062 | 0.930 | HxYxP motif containing repeats seen only in C. elegans F29G6.3b, signal peptide                                                     |
| 403 | cgd7_2320 | 1.062 | 1.040 | thioesterase of the a/b hydrolase superfamily, possible bacterial origin                                                            |
| 404 | cgd8_3360 | 1.062 | 1.147 | S. pombe SPAC1687.04 like conserved eukaryotic protein that shares a domain with several MCM7, probably involved in DNA replication |
| 405 | cgd7_5170 | 1.061 | 1.065 | deoxyuridinetriphosphatase, possible bacterial origin                                                                               |
| 406 | cgd7_5270 | 1.061 | 1.052 | Translation initiation factor 2, alpha subunit(eIF2-alpha); S1-like RNA binding domain                                              |
| 407 | cgd4_1930 | 1.061 | 0.959 | possible origin recognition complex protein subunit 2, orc2                                                                         |
| 408 | cgd3_1750 | 1.061 | 0.851 | conserved hypothetical protein                                                                                                      |
| 409 | cgd1_890  | 1.060 | 1.047 | protein kinase domain                                                                                                               |
| 410 | cgd7_5490 | 1.060 | 1.041 | PRP18 (SFM+PRP18 domains)                                                                                                           |
| 411 | cgd4_1390 | 1.060 | 1.136 | possible ABC transporter with AAA domain and 12 transmembrane domains                                                               |
| 412 | cgd8_3380 | 1.059 | 1.001 | Rrp12p like nucleolar protein                                                                                                       |
| 413 | cgd2_770  | 1.059 | 1.118 | hypothetical protein                                                                                                                |
| 414 | cgd3_1340 | 1.059 | 1.076 | NMD3p like protein involved in nonsense mediated decay                                                                              |
| 415 | cgd8_5010 | 1.059 | 1.120 | hypothetical protein                                                                                                                |
| 416 | cgd4_60   | 1.059 | 0.915 | extracellular membrane associated protein with a signal peptide, an EGF domain followed by 10 transmembrane domains                 |
| 417 | cgd6_3070 | 1.059 | 0.981 | hypothetical protein with a signal peptide                                                                                          |
| 418 | cgd2_2260 | 1.059 | 1.119 | zuotin related factor-1 like protein with a DNAJ domain at the N-terminus and 2 SANT domains                                        |
| 419 | cgd3_3190 | 1.058 | 1.090 | GCN5 like acetylase + bromodomain                                                                                                   |
| 420 | cgd5_2080 | 1.058 | 1.004 | protein with PHD finger and a nipped-B/Mis4/Scs2 like domain at the C-terminus                                                      |
| 421 | cgd8_4390 | 1.058 | 0.975 | hypothetical protein                                                                                                                |
| 422 | cgd4_1290 | 1.058 | 1.081 | small hypothetical protein, possible conserved                                                                                      |
| 423 | cgd8_900  | 1.057 | 1.146 | Ydr449cp/Utp6p; small (ribosomal) subunit (SSU) processosome (contains U3 snoRNA). HAT repeats                                      |
| 424 | cgd8_3580 | 1.057 | 1.098 | hypothetical protein, signal peptide, paralogs                                                                                      |
| 425 | cgd4_2610 | 1.057 | 1.090 | hypothetical protein                                                                                                                |
| 426 | cgd3_3350 | 1.057 | 1.099 | hypothetical protein                                                                                                                |
| 427 | cgd2_2600 | 1.055 | 1.003 | hypothetical protein                                                                                                                |
| 428 | cgd8_2630 | 1.055 | 1.074 | APG10/ Aut1p like like autophagocytosis protein involved in vacuolar transport                                                      |
| 429 | cgd7_2430 | 1.055 | 1.013 | translation initiation factor eIF-5; Tif5p, ZnR+W2 domains                                                                          |
| 430 | cgd2_1310 | 1.054 | 1.115 | 11 transmembrane domain protein                                                                                                     |
| 431 | cgd7_5210 | 1.054 | 1.090 | bromodomain protein                                                                                                                 |
| 432 | cgd3_590  | 1.054 | 0.918 | hypothetical protein with 4 transmembrane domains, possible unusual phyletic distribution                                           |
| 433 | cgd6_1830 | 1.054 | 0.899 | HT-1080/Cdc123p - like protein                                                                                                      |
| 434 | cgd6_3400 | 1.054 | 1.097 | protein kinase                                                                                                                      |
| 435 | cgd3_3440 | 1.053 | 0.981 | heat shock protein HSP70, mitochondrial                                                                                             |
| 436 | cgd7_3790 | 1.053 | 1.064 | unconventional myosin                                                                                                               |
| 437 | cgd8_3660 | 1.053 | 1.071 | RNA 3'-Terminal Phosphate Cyclase-like protein                                                                                      |
| 438 | cgd6_2280 | 1.052 | 0.960 | hypothetical protein with signal peptide and 12 or more transmembrane domains                                                       |
| 439 | cgd4_510  | 1.051 | 0.886 | hypothetical protein                                                                                                                |
| 440 | cgd1_1470 | 1.050 | 1.101 | hypothetical protein, possible transmembrane domain within N-terminus                                                               |
| 441 | cgd2_2990 | 1.050 | 1.092 | 60S ribosomal protein L13, putative                                                                                                 |
| 442 | cgd7_4460 | 1.049 | 1.059 | 60S ribosomal protein L6                                                                                                            |
| 443 | cgd8_120  | 1.047 | 1.030 | hypothetical protein                                                                                                                |

|     |           |       |       |                                                                                                                          |
|-----|-----------|-------|-------|--------------------------------------------------------------------------------------------------------------------------|
| 444 | cgd7_4620 | 1.047 | 1.093 | Rf-A (OB fold protein)                                                                                                   |
| 445 | cgd8_2790 | 1.045 | 1.075 | pleckstrin homology (PH domain) containing protein                                                                       |
| 446 | cgd7_2280 | 1.045 | 1.136 | 60S ribosomal protein L40                                                                                                |
| 447 | cgd3_2320 | 1.045 | 1.037 | cGMP phosphodiesterase A4                                                                                                |
| 448 | cgd7_100  | 1.045 | 1.087 | ring domain-containing protein                                                                                           |
| 449 | cgd5_3470 | 1.045 | 0.946 | E. coli yfiP family protein                                                                                              |
| 450 | cgd5_1780 | 1.045 | 1.014 | MJ1625/yease Yp1009cp-like HhH domain                                                                                    |
| 451 | cgd8_140  | 1.044 | 0.925 | hypothetical protein                                                                                                     |
| 452 | cgd4_1990 | 1.044 | 1.181 | RRp1-like protein                                                                                                        |
| 453 | cgd3_4150 | 1.042 | 1.094 | cutinase negative acting protein, putative                                                                               |
| 454 | cgd4_440  | 1.041 | 0.868 | XPG, DNA excision repair protein, flap endonuclease                                                                      |
| 455 | cgd3_1940 | 1.040 | 1.100 | conserved hypothetical protein                                                                                           |
| 456 | cgd4_860  | 1.039 | 1.145 | possible WWE domain                                                                                                      |
| 457 | cgd5_1620 | 1.037 | 1.121 | hypothetical protein with short conserved N-terminal motif, possible cysteine binding domain                             |
| 458 | cgd6_150  | 1.036 | 1.137 | synaptobrevin'synaptobrevin, adjacent duplicated gene'                                                                   |
| 459 | cgd3_760  | 1.036 | 0.877 | HMG-like nuclear protein, Nhp2p, pelota RNA binding domain containing protein                                            |
| 460 | cgd7_600  | 1.036 | 1.179 | hypothetical protein                                                                                                     |
| 461 | cgd1_2530 | 1.036 | 0.991 | TRAFAC type P-loop GTPase that may be related to kinesin                                                                 |
| 462 | cgd3_2140 | 1.036 | 0.814 | hypothetical protein                                                                                                     |
| 463 | cgd4_890  | 1.034 | 1.105 | hypothetical protein                                                                                                     |
| 464 | cgd6_4110 | 1.034 | 0.925 | hypothetical protein                                                                                                     |
| 465 | cgd2_1840 | 1.033 | 1.082 | signal peptide                                                                                                           |
| 466 | cgd8_3240 | 1.033 | 1.044 | apicomplexan specific protein                                                                                            |
| 467 | cgd6_5010 | 1.033 | 0.865 | hypothetical protein                                                                                                     |
| 468 | cgd3_3540 | 1.032 | 0.999 | hypothetical protein                                                                                                     |
| 469 | cgd7_4350 | 1.032 | 0.906 | myosin'unconventional myosin fused to an RCC1 domain (unique)'                                                           |
| 470 | cgd3_3690 | 1.031 | 1.169 | U5 snRNP 100 kD protein, putative                                                                                        |
| 471 | cgd2_1050 | 1.030 | 0.927 | signal peptide                                                                                                           |
| 472 | cgd2_2290 | 1.029 | 1.134 | cyclin 6 pci7                                                                                                            |
| 473 | cgd5_4420 | 1.029 | 1.151 | MJ0710-like (thump + methylase domains). RNA methylase                                                                   |
| 474 | cgd3_850  | 1.027 | 1.125 | hypothetical protein                                                                                                     |
| 475 | cgd3_4060 | 1.027 | 0.938 | histone transcription regulator (HIR1)-like WD40 repeat protein                                                          |
| 476 | cgd3_2950 | 1.027 | 1.021 | ribosomal RNA assembly protein mis3/dribble/Krr1p. KH domain                                                             |
| 477 | cgd5_2030 | 1.025 | 1.033 | thioredoxin, putative                                                                                                    |
| 478 | cgd5_730  | 1.024 | 0.901 | DNA-directed RNA polymerase I, putative                                                                                  |
| 479 | cgd3_4260 | 1.024 | 1.009 | peptidase'insulinase like peptidase'                                                                                     |
| 480 | cgd4_4040 | 1.023 | 1.066 | Yer006wp-like. Yjeq GTPase                                                                                               |
| 481 | cgd3_3180 | 1.023 | 0.859 | Ser/Thr protein kinase                                                                                                   |
| 482 | cgd4_1820 | 1.023 | 0.826 | hypothetical protein                                                                                                     |
| 483 | cgd5_960  | 1.023 | 1.119 | Oxr1p like TLDc domain containing protein                                                                                |
| 484 | cgd6_2610 | 1.023 | 1.133 | ERCC1 excision repair 1; C-terminal HhH domain                                                                           |
| 485 | cgd2_180  | 1.023 | 0.848 | hypothetical protein                                                                                                     |
| 486 | cgd2_270  | 1.022 | 1.086 | translation initiation factor eIF-3 subunit 7                                                                            |
| 487 | cgd6_1390 | 1.022 | 1.052 | ribosomal protein S23                                                                                                    |
| 488 | cgd5_2870 | 1.022 | 1.079 | F11M21.28-like; 3 CCH RNA binding domain protein involved in RNA metabolism                                              |
| 489 | cgd4_2630 | 1.021 | 0.894 | hypothetical protein                                                                                                     |
| 490 | cgd3_130  | 1.021 | 1.121 | DRG like OBG family GTPase fused to an RNA binding domain TGS domain, Fun11p                                             |
| 491 | cgd5_2790 | 1.021 | 1.105 | katanin p60/fidgetin family with AAA ATPase                                                                              |
| 492 | cgd4_2430 | 1.020 | 1.119 | hypothetical protein containing a signal peptide and 2 transmembrane domains                                             |
| 493 | cgd7_3320 | 1.019 | 1.071 | RING finger protein                                                                                                      |
| 494 | cgd8_4110 | 1.019 | 0.890 | hypothetical protein                                                                                                     |
| 495 | cgd2_2660 | 1.017 | 1.093 | UDP N-acetylglucosamine transporter-like nucleotide sugar transporter with 10 transmembrane domains                      |
| 496 | cgd5_2640 | 1.017 | 0.850 | little finger (CxxC...CxxC) domain containing protein                                                                    |
| 497 | cgd3_3820 | 1.016 | 1.060 | DNA LIGASE I                                                                                                             |
| 498 | cgd3_2270 | 1.016 | 0.976 | WD repeat protein                                                                                                        |
| 499 | cgd2_70   | 1.016 | 1.068 | ABC transporter, with 12 x transmembrane domains and 2x AAA domains                                                      |
| 500 | cgd7_2020 | 1.014 | 1.061 | hypothetical protein                                                                                                     |
| 501 | cgd4_3590 | 1.013 | 1.038 | conserved hypothetical protein                                                                                           |
| 502 | cgd2_1530 | 1.012 | 1.071 | conserved hypothetical protein                                                                                           |
| 503 | cgd8_4410 | 1.012 | 1.108 | hypothetical protein, possible transmembrane domain                                                                      |
| 504 | cgd6_4870 | 1.011 | 1.104 | hypothetical protein                                                                                                     |
| 505 | cgd8_1400 | 1.011 | 0.903 | glycerol-3-phosphate acyltransferase family, possible plant origin, possible signal peptide plus 2 transmembrane domains |
| 506 | cgd3_3080 | 1.011 | 0.994 | hypothetical protein                                                                                                     |
| 507 | cgd5_3220 | 1.008 | 0.881 | proteasome subunit beta7; NTN hydrolase fold                                                                             |
| 508 | cgd2_4360 | 1.006 | 0.953 | hypothetical protein                                                                                                     |

|     |           |       |       |                                                                                                                                     |
|-----|-----------|-------|-------|-------------------------------------------------------------------------------------------------------------------------------------|
| 509 | cgd7_3650 | 1.005 | 0.854 | DP1 DNA binding protein                                                                                                             |
| 510 | cgd4_700  | 1.005 | 1.000 | conserved protein of possible plant or bacterial origin                                                                             |
| 511 | cgd6_3060 | 1.005 | 1.197 | hypothetical protein                                                                                                                |
| 512 | cgd7_2770 | 1.004 | 0.824 | uncharacterized low complexity protein                                                                                              |
| 513 | cgd6_3890 | 1.004 | 0.928 | hypothetical protein                                                                                                                |
| 514 | cgd3_2540 | 1.004 | 1.059 | histone H3                                                                                                                          |
| 515 | cgd7_2350 | 1.003 | 1.168 | hypothetical small protein, possible signal peptide                                                                                 |
| 516 | cgd3_2100 | 1.002 | 1.067 | phosphatidylserine decarboxylase, putative                                                                                          |
| 517 | cgd6_3460 | 1.001 | 0.917 | hypothetical protein                                                                                                                |
| 518 | cgd1_3130 | 1.001 | 0.940 | conserved eukaryotic nuclear protein that shares a domain with yeast Lcp5p, a component of the U3 small nucleolar ribonucleoprotein |
| 519 | cgd1_780  | 1.001 | 0.804 | hypothetical protein, possible 2 transmembrane domains                                                                              |
| 520 | cgd7_430  | 1.000 | 0.874 | cyclin-dependent kinase-related kinase, putative                                                                                    |
| 521 | cgd4_3330 | 1.000 | 0.932 | hypothetical protein                                                                                                                |
| 522 | cgd8_1090 | 1.000 | 0.864 | hypothetical protein                                                                                                                |
| 523 | cgd2_2840 | 1.000 | 1.117 | pleckstrin homology (PH) domain containing protein with N-terminal ankyrin repeats                                                  |
| 524 | cgd6_3920 | 0.997 | 0.899 | hypothetical protein with signal peptide                                                                                            |
| 525 | cgd6_2700 | 0.997 | 0.905 | Low complexity protein, possible apicomplexan conserved                                                                             |
| 526 | cgd5_170  | 0.996 | 0.832 | hypothetical protein                                                                                                                |
| 527 | cgd1_1210 | 0.996 | 1.163 | conserved hypothetical protein                                                                                                      |
| 528 | cgd2_1230 | 0.996 | 1.140 | hypothetical protein                                                                                                                |
| 529 | cgd3_2910 | 0.995 | 0.939 | hypothetical protein                                                                                                                |
| 530 | cgd7_4020 | 0.995 | 0.905 | cryptosporidial mucin, large thr stretch, signal peptide sequence                                                                   |
| 531 | cgd3_3470 | 0.995 | 0.951 | proliferating cell nuclear antigen                                                                                                  |
| 532 | cgd4_320  | 0.994 | 1.106 | Rab11, putative                                                                                                                     |
| 533 | cgd4_630  | 0.994 | 0.954 | RAD14/XpA, DNA excision repair protein                                                                                              |
| 534 | cgd5_2600 | 0.993 | 1.173 | putative leucine aminopeptidase; of possible plant or bacterial origin                                                              |
| 535 | cgd1_2800 | 0.992 | 1.138 | conserved hypothetical protein                                                                                                      |
| 536 | cgd2_2400 | 0.992 | 0.884 | ATPase, class II, type 9B, putative                                                                                                 |
| 537 | cgd2_320  | 0.992 | 0.906 | conserved hypothetical protein                                                                                                      |
| 538 | cgd7_640  | 0.991 | 1.045 | Prp16p pre-mRNA splicing factor. HrpA family SFII helicase                                                                          |
| 539 | cgd2_90   | 0.991 | 1.105 | ABC transporter with 9x transmembrane domains and 2xAAA                                                                             |
| 540 | cgd6_3970 | 0.991 | 0.923 | glutaredoxin-like protein; 2 thioredoxin folds                                                                                      |
| 541 | cgd3_4220 | 0.990 | 1.169 | secreted insulinase like peptidase, signal peptide                                                                                  |
| 542 | cgd4_1910 | 0.990 | 0.985 | conserved hypothetical protein                                                                                                      |
| 543 | cgd5_2720 | 0.990 | 1.067 | large protein containing a signal peptide                                                                                           |
| 544 | cgd6_3080 | 0.989 | 1.003 | hypothetical protein with a signal peptide                                                                                          |
| 545 | cgd7_2670 | 0.988 | 1.105 | serine/threonine protein phosphatase, putative                                                                                      |
| 546 | cgd8_2280 | 0.987 | 0.962 | uncharacterized protein with 5 transmembrane domain                                                                                 |
| 547 | cgd3_1250 | 0.986 | 1.155 | ribosomal protein L14                                                                                                               |
| 548 | cgd7_960  | 0.985 | 1.010 | hypothetical protein                                                                                                                |
| 549 | cgd6_1530 | 0.985 | 1.144 | DNA repair protein Rad4p                                                                                                            |
| 550 | cgd5_10   | 0.985 | 0.925 | signal peptide containing protein                                                                                                   |
| 551 | cgd7_3520 | 0.985 | 0.875 | hypothetical protein                                                                                                                |
| 552 | cgd2_1220 | 0.985 | 1.170 | conserved hypothetical protein                                                                                                      |
| 553 | cgd8_4840 | 0.984 | 0.912 | large protein with 2 MYB domains plus low complexity; GA repeat and Q repeat at the C-terminus                                      |
| 554 | cgd1_360  | 0.983 | 1.050 | conserved hypothetical protein                                                                                                      |
| 555 | cgd7_840  | 0.982 | 0.846 | hypothetical protein                                                                                                                |
| 556 | cgd1_760  | 0.982 | 0.897 | dual specificity phosphatase                                                                                                        |
| 557 | cgd7_3350 | 0.982 | 1.110 | eukaryotic DNA topoisomerase I                                                                                                      |
| 558 | cgd8_3980 | 0.982 | 1.052 | hypothetical protein                                                                                                                |
| 559 | cgd8_4320 | 0.982 | 0.917 | possible conserved domain (Zn finger?)                                                                                              |
| 560 | cgd7_1190 | 0.981 | 1.096 | Ser/Thr protein kinase                                                                                                              |
| 561 | cgd3_4210 | 0.980 | 0.972 | secreted insulinase like peptidase, signal peptide                                                                                  |
| 562 | cgd4_3820 | 0.980 | 0.850 | hypothetical protein                                                                                                                |
| 563 | cgd6_3100 | 0.979 | 0.896 | dual specificity phosphatase, signal peptide                                                                                        |
| 564 | cgd2_4130 | 0.979 | 1.121 | ORF 73, contains large complex repeat CR 73, putative                                                                               |
| 565 | cgd7_2550 | 0.978 | 1.133 | hypothetical protein                                                                                                                |
| 566 | cgd6_5110 | 0.978 | 0.921 | large hypothetical protein with possible signal peptide                                                                             |
| 567 | cgd6_2200 | 0.976 | 1.146 | leucine-rich repeats protein                                                                                                        |
| 568 | cgd5_2550 | 0.976 | 1.128 | polyubiquitin with 3 Ub domains                                                                                                     |
| 569 | cgd2_1170 | 0.975 | 1.082 | zinc finger protein                                                                                                                 |
| 570 | cgd7_5340 | 0.975 | 1.185 | uncharacterized protein                                                                                                             |
| 571 | cgd2_4320 | 0.974 | 1.071 | thioredoxin reductase 1                                                                                                             |
| 572 | cgd8_2650 | 0.974 | 1.085 | conserved hypothetical protein                                                                                                      |
| 573 | cgd7_3730 | 0.974 | 0.875 | long chain fatty acyl diphosphate synthase                                                                                          |
| 574 | cgd4_1350 | 0.974 | 0.885 | regulator of chromosome condensation                                                                                                |

|     |           |       |       |                                                                                                                                                                                                          |
|-----|-----------|-------|-------|----------------------------------------------------------------------------------------------------------------------------------------------------------------------------------------------------------|
| 575 | cgd3_1020 | 0.973 | 1.025 | hypothetical protein                                                                                                                                                                                     |
| 576 | cgd6_2340 | 0.973 | 0.924 | hypothetical protein with signal peptide and 12 or more transmembrane domains                                                                                                                            |
| 577 | cgd5_2460 | 0.973 | 0.947 | RNA binding RGG repeats plus RRM domain containing protein                                                                                                                                               |
| 578 | cgd8_3330 | 0.973 | 0.872 | conserved hypothetical protein                                                                                                                                                                           |
| 579 | cgd7_4760 | 0.972 | 1.053 | ribosomal protein S4, putative                                                                                                                                                                           |
| 580 | cgd6_2170 | 0.972 | 0.930 | 60S ribosomal protein L11                                                                                                                                                                                |
| 581 | cgd8_3220 | 0.971 | 1.133 | La domain fused to two RRMs (as in the La autoantigen) which is further fused to a C-terminal domain present in the plant DCL protein and the C-terminus of the alpha subunit of the plant RNA polymeras |
| 582 | cgd4_2130 | 0.971 | 1.101 | TBC domain containing protein                                                                                                                                                                            |
| 583 | cgd4_2540 | 0.971 | 1.054 | 26S proteasome regulatory subunit 26b like AAA ATPase                                                                                                                                                    |
| 584 | cgd3_560  | 0.970 | 0.810 | hypothetical protein with a signal peptide                                                                                                                                                               |
| 585 | cgd2_2150 | 0.970 | 0.867 | hypothetical protein                                                                                                                                                                                     |
| 586 | cgd2_2800 | 0.970 | 0.855 | THUMP RNA binding domain containing protein, Yg1232wp-like                                                                                                                                               |
| 587 | cgd6_680  | 0.969 | 0.921 | conserved protein with possible C2 domain                                                                                                                                                                |
| 588 | cgd1_2670 | 0.968 | 0.937 | ankyrin-related protein, putative                                                                                                                                                                        |
| 589 | cgd3_3850 | 0.968 | 0.922 | Cbf5p; centromere-binding factor 5 like PUA domain containing protein with a type I pseudouridine synthase domain                                                                                        |
| 590 | cgd8_2250 | 0.966 | 0.933 | Rat1 Kar1/Rat1 like 5'-3' exonuclease                                                                                                                                                                    |
| 591 | cgd6_1200 | 0.965 | 0.977 | diphthine synthase; diphthamide biosynthesis methyltransferase                                                                                                                                           |
| 592 | cgd8_3570 | 0.965 | 1.060 | predicted secreted protein                                                                                                                                                                               |
| 593 | cgd6_4290 | 0.965 | 0.881 | large protein having a MATH plus possible UBC hydrolase plus type I pseurousyn plus hexapeptide                                                                                                          |
| 594 | cgd6_940  | 0.964 | 1.071 | pescadillo containing BRCT domain                                                                                                                                                                        |
| 595 | cgd8_1150 | 0.964 | 0.883 | choline-phosphate cytidyltransferase                                                                                                                                                                     |
| 596 | cgd6_1540 | 0.963 | 0.857 | possible histone mRNA hairpin-binding protein                                                                                                                                                            |
| 597 | cgd2_560  | 0.962 | 0.868 | large low complexity protein                                                                                                                                                                             |
| 598 | cgd4_3160 | 0.962 | 1.091 | putative 40S ribosomal protein S3A                                                                                                                                                                       |
| 599 | cgd4_3270 | 0.962 | 1.105 | heat shock 105kD; heat shock 105kD alpha; heat shock 105kD beta; heat shock 105kDa protein 1                                                                                                             |
| 600 | cgd1_3610 | 0.961 | 1.119 | secreted protein of the alpha beta hydrolase superfamily, signal peptide                                                                                                                                 |
| 601 | cgd1_2450 | 0.961 | 0.959 | ELP3 like acetyltransferase involved in transcription                                                                                                                                                    |
| 602 | cgd4_3020 | 0.961 | 0.939 | hypothetical protein with a signal peptide                                                                                                                                                               |
| 603 | cgd3_4190 | 0.960 | 1.113 | secreted insulinase like peptidase                                                                                                                                                                       |
| 604 | cgd7_130  | 0.959 | 1.111 | 40S ribosomal protein S14                                                                                                                                                                                |
| 605 | cgd8_5240 | 0.959 | 0.805 | U2AG splicing factor U2AF U2snRNP auxiliary factor small subunit CCCh+RRM+CCCh-like                                                                                                                      |
| 606 | cgd6_2860 | 0.959 | 0.895 | uncharacterized coiled coil protein                                                                                                                                                                      |
| 607 | cgd6_3480 | 0.958 | 0.888 | hypothetical protein                                                                                                                                                                                     |
| 608 | cgd4_710  | 0.957 | 0.886 | Ynr054cp, basal transcriptional activator hABT1, RRM domain containing protein                                                                                                                           |
| 609 | cgd4_3200 | 0.957 | 0.918 | hypothetical protein                                                                                                                                                                                     |
| 610 | cgd4_1980 | 0.957 | 1.152 | TBC domain containing protein                                                                                                                                                                            |
| 611 | cgd1_3780 | 0.957 | 0.890 | domain KOG1015, transcription regulator XNP/ATRX, DEAD-box superfamily, signal peptide                                                                                                                   |
| 612 | cgd5_30   | 0.956 | 0.947 | hypothetical protein                                                                                                                                                                                     |
| 613 | cgd2_1790 | 0.956 | 0.946 | hypothetical protein                                                                                                                                                                                     |
| 614 | cgd6_2350 | 0.956 | 1.056 | mitochondrial carrier protein, 4 transmembrane domain                                                                                                                                                    |
| 615 | cgd3_1300 | 0.956 | 0.946 | 60S ribosomal protein L12                                                                                                                                                                                |
| 616 | cgd8_1680 | 0.955 | 1.041 | hypothetical protein                                                                                                                                                                                     |
| 617 | cgd5_850  | 0.955 | 0.850 | vacuolar ATP synthase subunit F                                                                                                                                                                          |
| 618 | cgd1_2220 | 0.955 | 0.871 | apicomplexan specific protein                                                                                                                                                                            |
| 619 | cgd8_5220 | 0.955 | 0.876 | signal peptide, 4+ transmembrane domains                                                                                                                                                                 |
| 620 | cgd3_390  | 0.954 | 1.090 | RecQ SF II RNA helicase, DEXDc+HELICc                                                                                                                                                                    |
| 621 | cgd8_5160 | 0.953 | 0.957 | uncharacterized apicomplexan-specific protein                                                                                                                                                            |
| 622 | cgd2_390  | 0.952 | 1.156 | hypothetical protein                                                                                                                                                                                     |
| 623 | cgd6_1000 | 0.952 | 0.929 | hypothetical protein with signal peptide                                                                                                                                                                 |
| 624 | cgd7_420  | 0.952 | 0.893 | protein with DEXDc plus ring plus HELICc; possible SNF2 domain                                                                                                                                           |
| 625 | cgd7_1690 | 0.952 | 1.002 | meiotic recombination protein DMC1-like protein                                                                                                                                                          |
| 626 | cgd5_1960 | 0.951 | 0.926 | enolase (2-phosphoglycerate dehydratase)                                                                                                                                                                 |
| 627 | cgd7_3210 | 0.950 | 1.048 | hypothetical protein                                                                                                                                                                                     |
| 628 | cgd5_910  | 0.950 | 1.183 | protein with conserved domain that is fused in vertebrates to neuralized domain repeats                                                                                                                  |
| 629 | cgd4_2440 | 0.949 | 0.918 | small hypothetical protein with signal peptide                                                                                                                                                           |
| 630 | cgd7_3120 | 0.948 | 0.955 | pyruvate decarboxylase                                                                                                                                                                                   |
| 631 | cgd1_3710 | 0.948 | 0.873 | acetyl-coenzyme A synthetase                                                                                                                                                                             |
| 632 | cgd2_3070 | 0.948 | 0.991 | high mobility group (HMG)-box                                                                                                                                                                            |
| 633 | cgd6_4170 | 0.947 | 1.174 | hypothetical protein                                                                                                                                                                                     |
| 634 | cgd5_3160 | 0.947 | 1.040 | actin                                                                                                                                                                                                    |
| 635 | cgd7_3260 | 0.947 | 0.895 | SWIB domain protein                                                                                                                                                                                      |
| 636 | cgd4_3550 | 0.947 | 0.959 | secreted protein with signal peptide and 12 KAZAL repeats and a mucin-like stretch of threonines                                                                                                         |
| 637 | cgd6_1440 | 0.946 | 1.183 | hypothetical protein                                                                                                                                                                                     |
| 638 | cgd5_3330 | 0.946 | 0.998 | hypothetical protein with 5 transmembrane domains                                                                                                                                                        |
| 639 | cgd2_4310 | 0.946 | 0.879 | hypothetical protein                                                                                                                                                                                     |



|     |           |       |       |                                                                                                  |
|-----|-----------|-------|-------|--------------------------------------------------------------------------------------------------|
| 640 | cgd4_3370 | 0.945 | 0.880 | hypothetical protein                                                                             |
| 641 | cgd4_4460 | 0.945 | 0.861 | dihydrofolate reductase-thymidylate synthase                                                     |
| 642 | cgd7_1880 | 0.944 | 0.828 | 60S ribosomal protein L44                                                                        |
| 643 | cgd2_2560 | 0.944 | 0.883 | hypothetical protein, signal peptide                                                             |
| 644 | cgd3_1440 | 0.943 | 0.891 | U1 small nuclear ribonucleoprotein c like finger                                                 |
| 645 | cgd5_3990 | 0.942 | 0.886 | protein with 4 transmembrane domains, signal peptide and a RING domain                           |
| 646 | cgd1_1070 | 0.942 | 0.816 | RRM domain protein                                                                               |
| 647 | cgd6_4410 | 0.942 | 1.178 | DNA polymerase delta catalytic subunit. DNAQ-like 3'-5' exonuclease; RNaseH fold                 |
| 648 | cgd2_3700 | 0.942 | 0.942 | SWI/SNF related putative transcriptional regulator ATPase                                        |
| 649 | cgd5_1240 | 0.942 | 1.040 | Tsr1p GTPase, multitransmembrane region protein                                                  |
| 650 | cgd8_1890 | 0.941 | 0.858 | hypothetical protein                                                                             |
| 651 | cgd5_3230 | 0.941 | 1.062 | superoxide dismutase                                                                             |
| 652 | cgd7_240  | 0.941 | 0.932 | hypothetical protein                                                                             |
| 653 | cgd1_240  | 0.940 | 1.012 | predicted secreted protein                                                                       |
| 654 | cgd4_3650 | 0.940 | 0.969 | conserved hypothetical protein                                                                   |
| 655 | cgd6_3930 | 0.940 | 0.859 | hypothetical protein                                                                             |
| 656 | cgd5_3560 | 0.940 | 0.993 | CNcl1p/MJ0026/YebU-like. SUN family methylase                                                    |
| 657 | cgd4_2880 | 0.939 | 0.868 | hypothetical protein                                                                             |
| 658 | cgd4_3670 | 0.939 | 0.917 | uncharacterized low complexity protein                                                           |
| 659 | cgd8_430  | 0.938 | 1.043 | 60S ribosomal protein L7A                                                                        |
| 660 | cgd7_4500 | 0.938 | 1.096 | signal peptide, large secreted protein                                                           |
| 661 | cgd5_660  | 0.938 | 0.820 | thioredoxin domain containing protein                                                            |
| 662 | cgd6_1010 | 0.937 | 0.922 | PP2C like protein phosphatase                                                                    |
| 663 | cgd5_2780 | 0.936 | 0.924 | 40S ribosomal protein S10                                                                        |
| 664 | cgd5_3360 | 0.936 | 1.067 | adenylate kinase                                                                                 |
| 665 | cgd7_3410 | 0.936 | 0.803 | SNF5 like protein                                                                                |
| 666 | cgd4_430  | 0.936 | 0.949 | ORC5 like AAA+ ATPase                                                                            |
| 667 | cgd8_940  | 0.936 | 0.951 | conserved hypothetical protein                                                                   |
| 668 | cgd8_4680 | 0.935 | 0.804 | conserved protein; Py hit 23481194                                                               |
| 669 | cgd3_880  | 0.935 | 0.958 | hypothetical protein                                                                             |
| 670 | cgd8_2020 | 0.935 | 0.856 | OGG1 like 8-oxoguanine DNA glycosylase involved in DNA repair                                    |
| 671 | cgd4_3130 | 0.935 | 0.986 | putative eIF6, translation initiation factor 6                                                   |
| 672 | cgd6_930  | 0.935 | 0.934 | Dim1p-like ERMB/KSGA methylase                                                                   |
| 673 | cgd7_940  | 0.935 | 1.078 | splicing factor RRM domain containing protein; T22E16.120 SC35-like splicing factor              |
| 674 | cgd8_1360 | 0.934 | 0.969 | hypothetical protein                                                                             |
| 675 | cgd4_670  | 0.933 | 1.061 | oocyst wall protein 3                                                                            |
| 676 | cgd7_4540 | 0.933 | 0.909 | CP15/60 sporozoite 60K protein                                                                   |
| 677 | cgd5_940  | 0.933 | 0.904 | histone H2A                                                                                      |
| 678 | cgd8_880  | 0.933 | 1.007 | transcription initiation factor TFIIB Sua7p; ZnR+2cyclins                                        |
| 679 | cgd7_970  | 0.932 | 1.150 | Syf1p. protein with 8 HAT domains                                                                |
| 680 | cgd7_3870 | 0.932 | 1.181 | conserved hypothetical protein                                                                   |
| 681 | cgd1_40   | 0.932 | 0.801 | UDP-galactose transporter, predicted signal peptide and 9 transmembrane domains                  |
| 682 | cgd3_460  | 0.932 | 0.920 | glutathione peroxidase                                                                           |
| 683 | cgd5_3710 | 0.931 | 0.811 | small nuclear ribonucleoprotein U6                                                               |
| 684 | cgd7_1230 | 0.931 | 1.167 | hypothetical protein                                                                             |
| 685 | cgd6_3340 | 0.931 | 0.925 | 60S ribosomal protein L32                                                                        |
| 686 | cgd7_5060 | 0.930 | 0.964 | putative 40S ribosomal protein S20                                                               |
| 687 | cgd5_3840 | 0.930 | 0.827 | hypothetical protein                                                                             |
| 688 | cgd8_3710 | 0.930 | 0.905 | hypothetical protein                                                                             |
| 689 | cgd1_390  | 0.930 | 1.162 | hypothetical protein with low amino acid complexity                                              |
| 690 | cgd7_4860 | 0.928 | 1.008 | uncharacterized protein                                                                          |
| 691 | cgd2_490  | 0.928 | 0.870 | hypothetical protein with signal peptide                                                         |
| 692 | cgd6_4990 | 0.927 | 0.925 | predicted peptidase of the alpha/beta-hydrolase fold                                             |
| 693 | cgd6_2260 | 0.926 | 1.038 | Hca4p helicase DBP4 (helicase CA4). EIF4A-1-family RNA SFII helicase                             |
| 694 | cgd1_340  | 0.925 | 1.114 | N-terminal machado-Joseph disease protein like domain, C-terminal UBX, DNA repair like domain    |
| 695 | cgd7_810  | 0.925 | 0.900 | protein phosphatase PP2A, calcineurin like phosphoesterase superfamily                           |
| 696 | cgd1_3430 | 0.925 | 1.178 | hypothetical protein                                                                             |
| 697 | cgd2_870  | 0.925 | 0.896 | drosophila CG6013 like HMG domain containing protein with a coiled coil region at the N-terminus |
| 698 | cgd6_3710 | 0.923 | 0.922 | 40S ribosomal protein S30                                                                        |
| 699 | cgd7_4050 | 0.923 | 0.823 | ribosomal protein L38                                                                            |
| 700 | cgd3_2990 | 0.922 | 1.062 | hypothetical protein with signal peptide and 7 transmembrane domains                             |
| 701 | cgd1_870  | 0.921 | 1.014 | cyclophilin like peptidyl-prolyl cis-trans isomerase, signal peptide                             |
| 702 | cgd6_1430 | 0.921 | 1.020 | transcription factor E2F WTH only                                                                |
| 703 | cgd2_820  | 0.921 | 0.964 | putative translation initiation factor 1 (eIF1), SUI1p                                           |
| 704 | cgd2_2650 | 0.921 | 1.087 | hypothetical protein, signal peptide, transmembrane domain near C-terminus                       |
| 705 | cgd5_4230 | 0.921 | 0.849 | hypothetical protein                                                                             |
| 706 | cgd1_1990 | 0.921 | 0.877 | hypothetical protein                                                                             |

|     |           |       |       |                                                                                                                                   |
|-----|-----------|-------|-------|-----------------------------------------------------------------------------------------------------------------------------------|
| 707 | cgd7_4360 | 0.921 | 1.031 | hypothetical protein                                                                                                              |
| 708 | cgd8_1940 | 0.921 | 0.830 | RAD25, helicase involved in DNA repair                                                                                            |
| 709 | cgd3_2890 | 0.920 | 0.978 | Prp8. JAB/PAD domain                                                                                                              |
| 710 | cgd8_3480 | 0.919 | 0.981 | 60S ribosomal protein L34                                                                                                         |
| 711 | cgd8_4540 | 0.919 | 1.070 | predicted coiled coil protein                                                                                                     |
| 712 | cgd8_5350 | 0.919 | 0.976 | conserved hypothetical protein                                                                                                    |
| 713 | cgd3_1420 | 0.918 | 0.931 | conserved small protein                                                                                                           |
| 714 | cgd7_4880 | 0.918 | 0.935 | signal peptide plus GPI anchored membrane protein                                                                                 |
| 715 | cgd2_20   | 0.917 | 0.959 | heat shock 70 (HSP70) protein                                                                                                     |
| 716 | cgd8_3700 | 0.917 | 0.891 | hypothetical protein                                                                                                              |
| 717 | cgd8_40   | 0.917 | 0.858 | signal peptide, predicted secreted protein of cryptosporidium-specific SKSR gene family                                           |
| 718 | cgd5_1380 | 0.917 | 0.955 | F11M21.28-like protein having 3 CCCH RNA binding domains; involved in RNA metabolism                                              |
| 719 | cgd4_1560 | 0.916 | 1.044 | hypothetical protein                                                                                                              |
| 720 | cgd8_2850 | 0.916 | 1.037 | hypothetical protein                                                                                                              |
| 721 | cgd3_170  | 0.916 | 0.837 | hypothetical protein                                                                                                              |
| 722 | cgd2_810  | 0.916 | 1.104 | calmodulin                                                                                                                        |
| 723 | cgd7_1180 | 0.915 | 0.917 | conserved hypothetical protein                                                                                                    |
| 724 | cgd5_530  | 0.915 | 0.900 | vacuolar H-ATPase subunit D                                                                                                       |
| 725 | cgd3_1290 | 0.915 | 1.117 | 14-3-3 domain containing protein                                                                                                  |
| 726 | cgd8_660  | 0.915 | 1.086 | large low complexity protein                                                                                                      |
| 727 | cgd8_2870 | 0.915 | 0.988 | 60S ribosomal protein L10A                                                                                                        |
| 728 | cgd5_1520 | 0.914 | 0.968 | hypothetical protein                                                                                                              |
| 729 | cgd4_2840 | 0.914 | 1.023 | Mra1/NEP1 like protein, involved in pre-rRNA processing, adjacent genes putative paralogs                                         |
| 730 | cgd8_4280 | 0.914 | 1.091 | zz domain protein                                                                                                                 |
| 731 | cgd6_2690 | 0.914 | 1.130 | macrophage infectivity potentiator (MIP);FKBP peptidyl-prolyl cis-trans isomerase-like fold, signal peptide + ER retention motif  |
| 732 | cgd1_3230 | 0.913 | 1.164 | protein kinase                                                                                                                    |
| 733 | cgd3_3370 | 0.913 | 0.908 | large hypothetical protein with signal peptide                                                                                    |
| 734 | cgd6_40   | 0.913 | 1.098 | conserved hypothetical protein                                                                                                    |
| 735 | cgd8_4200 | 0.913 | 0.818 | uncharacterized protein with several coiled-coil regions                                                                          |
| 736 | cgd6_5030 | 0.913 | 0.963 | hypothetical protein                                                                                                              |
| 737 | cgd6_4630 | 0.913 | 0.940 | 40S ribosomal protein S8                                                                                                          |
| 738 | cgd5_410  | 0.913 | 0.925 | Rad51                                                                                                                             |
| 739 | cgd4_4080 | 0.912 | 0.800 | putative rab GDI alpha                                                                                                            |
| 740 | cgd5_4560 | 0.912 | 1.003 | tryptophan synthase trpB of possible bacterial origin                                                                             |
| 741 | cgd4_2220 | 0.912 | 0.830 | possible double-stranded DNA-binding domain, small conserved protein                                                              |
| 742 | cgd2_2100 | 0.911 | 0.841 | hypothetical protein, possible signal peptide                                                                                     |
| 743 | cgd4_2290 | 0.911 | 0.974 | hypothetical protein                                                                                                              |
| 744 | cgd2_3190 | 0.911 | 1.052 | protein kinase, putative                                                                                                          |
| 745 | cgd2_1500 | 0.911 | 1.058 | possible translation initiation factor with possible PINT domain                                                                  |
| 746 | cgd5_1650 | 0.910 | 1.087 | hypothetical protein                                                                                                              |
| 747 | cgd5_1980 | 0.910 | 1.058 | hypothetical protein                                                                                                              |
| 748 | cgd7_920  | 0.910 | 0.914 | protein with 2 possible TPR domains, possible n-terminal acetyltransferase                                                        |
| 749 | cgd2_4210 | 0.910 | 0.880 | uncharacterized protein with several coiled coil regions                                                                          |
| 750 | cgd5_2630 | 0.909 | 0.969 | 60S ribosomal protein L7-B; Rp17bp; L30 RNA binding domain                                                                        |
| 751 | cgd5_1470 | 0.909 | 1.023 | signal peptide containing protein having a NDK (nucleoside-diphosphate kinase) domain                                             |
| 752 | cgd2_4200 | 0.909 | 1.020 | hypothetical protein                                                                                                              |
| 753 | cgd3_710  | 0.908 | 0.880 | large hypothetical protein with signal peptide                                                                                    |
| 754 | cgd6_1980 | 0.908 | 0.837 | hypothetical protein with a signal peptide                                                                                        |
| 755 | cgd3_1960 | 0.908 | 1.135 | hypothetical protein                                                                                                              |
| 756 | cgd2_1370 | 0.907 | 1.082 | hypothetical coiled coil protein                                                                                                  |
| 757 | cgd7_3390 | 0.907 | 0.936 | secreted alpha beta hydrolyse, signal peptide, secreted patatin like esterase (ralstonia best hits)                               |
| 758 | cgd6_4210 | 0.907 | 0.920 | kinesin-like boursin, putative                                                                                                    |
| 759 | cgd6_400  | 0.907 | 0.865 | Pre-mRNA polyadenylation factor                                                                                                   |
| 760 | cgd5_2310 | 0.907 | 1.009 | Sin3 like paired amphipathic helix containing protein                                                                             |
| 761 | cgd5_4290 | 0.906 | 0.979 | Swi/SNf2 RAD26                                                                                                                    |
| 762 | cgd4_2800 | 0.906 | 0.915 | hypothetical protein having a signal peptide                                                                                      |
| 763 | cgd2_2860 | 0.906 | 0.867 | hypothetical protein                                                                                                              |
| 764 | cgd2_2240 | 0.905 | 0.840 | hypothetical protein                                                                                                              |
| 765 | cgd8_3390 | 0.905 | 1.043 | S.cerevisiae Ssf2p/drosophila peter pan like protein that has an IMP4 domain at its N-terminus and is involved in rRNA processing |
| 766 | cgd8_4100 | 0.905 | 1.136 | PRP43 involved in spliceosome disassembly mRNA splicing                                                                           |
| 767 | cgd3_3000 | 0.904 | 1.034 | TBC domain containing protein                                                                                                     |
| 768 | cgd6_2090 | 0.904 | 0.951 | CpCOWP1, oocyst wall protein with type I and type II cysteine-rich repeats                                                        |
| 769 | cgd6_4670 | 0.904 | 0.996 | Prp9p-like splicing factor 3a subunit 3 snRNP. C-terminal C2H2                                                                    |
| 770 | cgd3_1530 | 0.904 | 0.842 | hypothetical protein                                                                                                              |
| 771 | cgd7_360  | 0.903 | 0.993 | heat shock protein, Hsp70                                                                                                         |

|     |           |       |       |                                                                                                                                                               |
|-----|-----------|-------|-------|---------------------------------------------------------------------------------------------------------------------------------------------------------------|
| 772 | cgd1_1590 | 0.902 | 1.030 | hypothetical protein                                                                                                                                          |
| 773 | cgd3_4320 | 0.902 | 0.964 | conserved hypothetical protein                                                                                                                                |
| 774 | cgd6_140  | 0.901 | 0.947 | possible Na <sup>+</sup> /H <sup>+</sup> and K <sup>+</sup> /H <sup>+</sup> antiporter with 12 transmembrane domains, duplicated adjacent gene                |
| 775 | cgd7_1080 | 0.901 | 0.833 | eIF3-p47 with JAB/PAD domain                                                                                                                                  |
| 776 | cgd1_2050 | 0.901 | 0.919 | hypothetical protein                                                                                                                                          |
| 777 | cgd7_4630 | 0.900 | 0.850 | hypothetical protein                                                                                                                                          |
| 778 | cgd4_250  | 0.900 | 0.883 | proteasome subunit alpha type 4, NTN hydrolase fold                                                                                                           |
| 779 | cgd1_1320 | 0.900 | 1.112 | developmental protein, putative                                                                                                                               |
| 780 | cgd4_140  | 0.900 | 1.014 | Swi2/Snf2 ATPase, Rad16 ortholog                                                                                                                              |
| 781 | cgd5_1990 | 0.900 | 0.997 | hypothetical protein                                                                                                                                          |
| 782 | cgd7_5390 | 0.900 | 1.159 | uncharacterized protein                                                                                                                                       |
| 783 | cgd1_220  | 0.900 | 0.972 | glycosylphosphatidylinositol transamidase, involved in GPI anchor biosynthesis                                                                                |
| 784 | cgd6_4160 | 0.900 | 0.927 | EF-hands domain containing protein                                                                                                                            |
| 785 | cgd1_1900 | 0.899 | 1.043 | Fur1p like uracil phosphoribosyltransferase                                                                                                                   |
| 786 | cgd2_3290 | 0.899 | 0.830 | hypothetical protein with a signal peptide plus thr stretch, possible mucin                                                                                   |
| 787 | cgd6_4590 | 0.899 | 0.897 | ankyrin-related protein, putative                                                                                                                             |
| 788 | cgd4_940  | 0.899 | 0.902 | hypothetical protein                                                                                                                                          |
| 789 | cgd3_2230 | 0.899 | 1.014 | hypothetical protein                                                                                                                                          |
| 790 | cgd4_930  | 0.899 | 0.875 | pap1p; poly A polymerase (eukaryotic type)                                                                                                                    |
| 791 | cgd5_1900 | 0.898 | 0.996 | XPA binding protein 1                                                                                                                                         |
| 792 | cgd1_270  | 0.898 | 1.118 | zinc finger protein                                                                                                                                           |
| 793 | cgd7_2240 | 0.898 | 0.990 | hypothetical protein, signal peptide, possible secreted protein                                                                                               |
| 794 | cgd4_1570 | 0.897 | 0.880 | hypothetical protein, possible conserved                                                                                                                      |
| 795 | cgd4_2600 | 0.897 | 0.988 | UDP-glucose 4-epimerase                                                                                                                                       |
| 796 | cgd6_2390 | 0.896 | 1.045 | DNA topoisomerase III beta-1, putative                                                                                                                        |
| 797 | cgd6_850  | 0.896 | 1.140 | thioredoxin; protein disulfide isomerase A6, signal peptide, possible transmembrane domain in C-terminal region                                               |
| 798 | cgd8_5390 | 0.896 | 0.963 | conserved hypothetical protein                                                                                                                                |
| 799 | cgd4_2830 | 0.895 | 0.836 | Mra1/NEP1 like protein, involved in pre-rRNA processing, adjacent genes putative paralogs                                                                     |
| 800 | cgd5_2380 | 0.895 | 1.117 | uncharacterized apicomplexan-specific serine rich low complexity protein                                                                                      |
| 801 | cgd8_5340 | 0.895 | 0.897 | coiled coil protein                                                                                                                                           |
| 802 | cgd8_2520 | 0.895 | 1.019 | Mtr4p like SKI family SFII helicase                                                                                                                           |
| 803 | cgd1_1660 | 0.895 | 0.974 | 60S ribosomal protein L36                                                                                                                                     |
| 804 | cgd1_1840 | 0.895 | 0.922 | hypothetical protein                                                                                                                                          |
| 805 | cgd2_1120 | 0.895 | 1.016 | putative molybdopterin synthase sulphurylase                                                                                                                  |
| 806 | cgd4_240  | 0.894 | 0.820 | hypothetical protein                                                                                                                                          |
| 807 | cgd7_5160 | 0.894 | 1.054 | U1 small nuclear ribonucleoprotein A, rrm domain                                                                                                              |
| 808 | cgd7_300  | 0.894 | 0.953 | CpCCP2; extracellular protein with a signal peptide, ricin, discoidin, NEC, LCCL, 2 levanase and an apicomplexan-specific cysteine-rich repeat (apicA repeat) |
| 809 | cgd4_530  | 0.894 | 0.940 | 26S proteasome regulatory subunit 5a with a vWA domain and two ubiquitin interacting motifs (UIM)                                                             |
| 810 | cgd6_100  | 0.893 | 0.983 | leucine rich repeat (LRR) protein                                                                                                                             |
| 811 | cgd1_970  | 0.893 | 1.011 | RING finger containing protein                                                                                                                                |
| 812 | cgd4_2750 | 0.893 | 0.951 | PWP1 family protein with WD40 repeats                                                                                                                         |
| 813 | cgd8_2350 | 0.893 | 0.921 | cyclophilin-RNA interacting protein, putative                                                                                                                 |
| 814 | cgd6_1870 | 0.893 | 0.875 | signal recognition particle SPR19                                                                                                                             |
| 815 | cgd1_2840 | 0.893 | 0.987 | contains a UVDDB domain that is present in CPSF_A and damage specific DNA binding protein 1                                                                   |
| 816 | cgd4_150  | 0.893 | 1.005 | pre-mRNA splicing protein; Prp31p--like                                                                                                                       |
| 817 | cgd5_1010 | 0.893 | 0.975 | hypothetical protein                                                                                                                                          |
| 818 | cgd5_2500 | 0.892 | 0.804 | ubiquitin C-terminal hydrolase of the cysteine proteinase fold                                                                                                |
| 819 | cgd4_32   | 0.892 | 1.038 | hypothetical protein                                                                                                                                          |
| 820 | cgd2_3110 | 0.891 | 0.905 | hypothetical protein containing a signal peptide                                                                                                              |
| 821 | cgd1_3650 | 0.891 | 0.983 | hypothetical protein, signal peptide                                                                                                                          |
| 822 | cgd6_830  | 0.891 | 0.837 | conserved hypothetical protein                                                                                                                                |
| 823 | cgd4_3290 | 0.890 | 0.926 | articulin family protein, adjacent paralogous gene                                                                                                            |
| 824 | cgd2_3000 | 0.890 | 1.073 | 40S ribosomal protein S16                                                                                                                                     |
| 825 | cgd1_3590 | 0.890 | 0.805 | hypothetical protein, possible transmembrane domain                                                                                                           |
| 826 | cgd5_2240 | 0.890 | 1.128 | DPAGT1 like N-acetylglucosamine-1-phosphate transferase                                                                                                       |
| 827 | cgd8_1380 | 0.890 | 0.960 | hypothetical protein                                                                                                                                          |
| 828 | cgd2_2790 | 0.890 | 1.060 | conserved hypothetical protein                                                                                                                                |
| 829 | cgd2_1410 | 0.890 | 0.906 | possible domain KOG3410, conserved alpha-helical protein                                                                                                      |
| 830 | cgd6_2730 | 0.889 | 1.071 | protein with signal peptide plus possible GPI signal or transmembrane domain at C-terminus                                                                    |
| 831 | cgd1_960  | 0.889 | 1.001 | RING finger containing protein                                                                                                                                |
| 832 | cgd1_2080 | 0.889 | 1.122 | hypothetical protein containing signal peptide and 3 transmembrane domain regions                                                                             |
| 833 | cgd5_3590 | 0.889 | 0.911 | putative transport protein                                                                                                                                    |
| 834 | cgd1_180  | 0.889 | 1.057 | hypothetical protein                                                                                                                                          |
| 835 | cgd6_540  | 0.888 | 1.121 | Ser/Thr protein kinase                                                                                                                                        |
| 836 | cgd8_2740 | 0.888 | 1.168 | hypothetical protein                                                                                                                                          |

|     |           |       |       |                                                                                                                                                                     |
|-----|-----------|-------|-------|---------------------------------------------------------------------------------------------------------------------------------------------------------------------|
| 837 | cgd5_2230 | 0.888 | 0.961 | membrane associated thioredoxin                                                                                                                                     |
| 838 | cgd7_2790 | 0.888 | 0.833 | regena domain protein (CCR-Not complex protein subunit 3), putative                                                                                                 |
| 839 | cgd3_1380 | 0.888 | 0.936 | hypothetical protein                                                                                                                                                |
| 840 | cgd2_150  | 0.888 | 0.831 | hypothetical protein                                                                                                                                                |
| 841 | cgd6_3730 | 0.888 | 0.902 | large extracellular protein with a signal peptide, apple domain and a transmembrane region                                                                          |
| 842 | cgd8_20   | 0.887 | 0.870 | signal peptide, predicted secreted protein of cryptosporidium-specific SKSR gene family                                                                             |
| 843 | cgd3_2440 | 0.886 | 0.893 | ribosomal protein S18A, rps18ap, HhH domain                                                                                                                         |
| 844 | cgd6_10   | 0.886 | 1.027 | hypothetical protein with signal peptide and cysteine rich region at the C-terminus                                                                                 |
| 845 | cgd6_1660 | 0.886 | 0.972 | conserved hypothetical protein                                                                                                                                      |
| 846 | cgd8_4760 | 0.886 | 0.847 | arginine n-methyltransferase                                                                                                                                        |
| 847 | cgd6_490  | 0.886 | 1.133 | zinc ZIP transporter protein, putative                                                                                                                              |
| 848 | cgd1_3040 | 0.886 | 1.024 | triosephosphate isomerase                                                                                                                                           |
| 849 | cgd5_1800 | 0.885 | 1.064 | hypothetical protein                                                                                                                                                |
| 850 | cgd2_2440 | 0.884 | 0.842 | hypothetical protein                                                                                                                                                |
| 851 | cgd6_2760 | 0.884 | 0.914 | hypothetical protein                                                                                                                                                |
| 852 | cgd4_2640 | 0.884 | 0.887 | hypothetical protein                                                                                                                                                |
| 853 | cgd2_3230 | 0.884 | 0.956 | heat shock protein DnaJ Pjf2, putative                                                                                                                              |
| 854 | cgd6_5250 | 0.884 | 1.193 | transcription elongation factor, SPT6-like                                                                                                                          |
| 855 | cgd6_3820 | 0.883 | 1.007 | membrane bound aspartyl proteinase with a signal peptide plus transmembrane domain                                                                                  |
| 856 | cgd4_3040 | 0.883 | 1.030 | Nifs-like protein; cysteine desulfurase                                                                                                                             |
| 857 | cgd5_2810 | 0.883 | 0.929 | ULP1 like chlamydin domain containing protease                                                                                                                      |
| 858 | cgd4_4240 | 0.883 | 1.146 | insulinase like peptidase                                                                                                                                           |
| 859 | cgd5_2270 | 0.883 | 0.907 | maternal embryonic leucine zipper kinase                                                                                                                            |
| 860 | cgd3_2940 | 0.883 | 0.996 | probable phosphatidylserine/phosphatidylglycerophosphate/cardiolipin synthase, 2x SMART_PLDc domains, possible bacterial origin                                     |
| 861 | cgd2_110  | 0.882 | 0.856 | Dbp6p, eIF4a-1 family RNA SFII helicase                                                                                                                             |
| 862 | cgd8_3810 | 0.882 | 1.015 | hypothetical protein                                                                                                                                                |
| 863 | cgd5_590  | 0.882 | 0.806 | hypothetical protein with possible transmembrane domain within C                                                                                                    |
| 864 | cgd5_3050 | 0.882 | 0.939 | hypothetical protein                                                                                                                                                |
| 865 | cgd3_930  | 0.882 | 1.033 | DnaJ domain, possible zf-CSL following                                                                                                                              |
| 866 | cgd1_2030 | 0.881 | 0.965 | membrane associated protein with over 9 transmembrane domains, signal peptide                                                                                       |
| 867 | cgd8_4150 | 0.880 | 0.975 | RRM+RGF RNA binding repeats                                                                                                                                         |
| 868 | cgd3_2460 | 0.880 | 1.040 | UbiA prenyltransferase family member (3127) , putative                                                                                                              |
| 869 | cgd5_1310 | 0.880 | 1.072 | conserved protein with possible signal peptide and ER retention motif; possible ER protein                                                                          |
| 870 | cgd3_2790 | 0.880 | 0.942 | cullin domain containing protein                                                                                                                                    |
| 871 | cgd8_2330 | 0.879 | 0.966 | pyridine nucleotide/ NAD(P) transhydrogenase alpha plus beta subunits, duplicated gene, possible signal peptide plus 12 transmembrane regions                       |
| 872 | cgd1_2400 | 0.879 | 0.996 | signal peptide, secreted protein                                                                                                                                    |
| 873 | cgd4_1030 | 0.879 | 0.841 | eukaryotic translation initiation factor                                                                                                                            |
| 874 | cgd4_3480 | 0.878 | 0.881 | hypothetical protein with signal peptide plus possible GPI anchor or transmembrane domain near C-terminus, within large locus of signal peptide containing proteins |
| 875 | cgd6_1040 | 0.878 | 0.818 | RNAse P Rpr2/Rpp21 subunit domain                                                                                                                                   |
| 876 | cgd7_2200 | 0.878 | 0.929 | hypothetical protein, signal peptide                                                                                                                                |
| 877 | cgd1_2360 | 0.878 | 1.000 | protein phosphatase 4 (formerly X), catalytic subunit; Protein phosphatase 4, catalytic subunit                                                                     |
| 878 | cgd3_3940 | 0.878 | 0.887 | predicted membrane associated protein                                                                                                                               |
| 879 | cgd1_150  | 0.878 | 0.968 | predicted secreted protein, signal peptide                                                                                                                          |
| 880 | cgd8_4850 | 0.877 | 0.882 | conserved hypothetical protein                                                                                                                                      |
| 881 | cgd3_2010 | 0.877 | 1.155 | hypothetical protein                                                                                                                                                |
| 882 | cgd5_2040 | 0.877 | 0.834 | dolichol phosphate mannose synthase, putative                                                                                                                       |
| 883 | cgd6_5320 | 0.876 | 1.133 | conserved hypothetical protein                                                                                                                                      |
| 884 | cgd2_2550 | 0.876 | 0.940 | hypothetical protein, signal peptide                                                                                                                                |
| 885 | cgd8_4020 | 0.875 | 1.022 | hypothetical protein                                                                                                                                                |
| 886 | cgd3_350  | 0.875 | 1.057 | Pop2p-like 3'5' exonuclease, CCR4-NOT transcription complex                                                                                                         |
| 887 | cgd3_3930 | 0.875 | 0.971 | 60S ribosomal protein L27A or L27a                                                                                                                                  |
| 888 | cgd8_2900 | 0.874 | 0.918 | ERV41 like membrane associated protein involved in vesicular transport with a transmembrane region near the C-terminus                                              |
| 889 | cgd2_410  | 0.874 | 1.058 | signal peptide, serine stretches, possible low mw mucin glycoprotein, locus of 6 genes                                                                              |
| 890 | cgd3_4340 | 0.874 | 0.900 | hypothetical protein                                                                                                                                                |
| 891 | cgd5_2220 | 0.874 | 0.827 | small nuclear ribonucleoprotein D1. SM domain containing protein                                                                                                    |
| 892 | cgd8_2050 | 0.873 | 0.917 | RRP5 like protein involved in rRNA biogenesis with 7 S1 domains and 5 HAT repeats                                                                                   |
| 893 | cgd5_4460 | 0.873 | 0.842 | hypothetical protein                                                                                                                                                |
| 894 | cgd2_720  | 0.872 | 0.910 | hypothetical protein                                                                                                                                                |
| 895 | cgd4_3540 | 0.872 | 0.907 | conserved hypothetical protein                                                                                                                                      |
| 896 | cgd5_1340 | 0.872 | 0.978 | conserved hypothetical protein                                                                                                                                      |
| 897 | cgd4_1650 | 0.871 | 0.968 | possible thioredoxin H-type of possible fungal or plant origin, small protein                                                                                       |
| 898 | cgd7_830  | 0.871 | 1.004 | queunine tRNA-ribosyltransferase                                                                                                                                    |
| 899 | cgd3_1330 | 0.870 | 1.077 | hypothetical protein having a signal peptide                                                                                                                        |

|     |           |       |       |                                                                                                                  |
|-----|-----------|-------|-------|------------------------------------------------------------------------------------------------------------------|
| 900 | cgd8_5280 | 0.869 | 1.048 | Deg1p-like type II pseudouridylylase TruA                                                                        |
| 901 | cgd8_450  | 0.869 | 0.918 | DNAj-like protein                                                                                                |
| 902 | cgd7_5460 | 0.869 | 1.037 | VPS16 vacuolar sorting protein                                                                                   |
| 903 | cgd3_3170 | 0.869 | 0.951 | replication factor RFC3 AAA+ ATPase                                                                              |
| 904 | cgd4_3750 | 0.868 | 0.879 | hypothetical protein with signal peptide                                                                         |
| 905 | cgd6_2430 | 0.868 | 1.000 | BTF domain, basal transcription factor                                                                           |
| 906 | cgd7_820  | 0.868 | 0.957 | RAD3'DEXDc+HELICc protein'                                                                                       |
| 907 | cgd5_3340 | 0.868 | 1.055 | putative vacuolar ATP synthase subunit d                                                                         |
| 908 | cgd3_2110 | 0.868 | 0.986 | nucleolar protein NOP5/NOP58-like pre-mRNA splicing factor prp31                                                 |
| 909 | cgd4_2460 | 0.867 | 0.959 | hypothetical protein with a signal peptide, gene within locus of signal-peptide containing hypothetical proteins |
| 910 | cgd7_2640 | 0.867 | 0.924 | TPR repeat protein                                                                                               |
| 911 | cgd4_920  | 0.867 | 1.022 | conserved hypothetical protein                                                                                   |
| 912 | cgd3_160  | 0.867 | 1.021 | hypothetical protein                                                                                             |
| 913 | cgd3_2280 | 0.866 | 0.808 | hypothetical protein                                                                                             |
| 914 | cgd7_2820 | 0.866 | 0.882 | hypothetical large low complexity protein                                                                        |
| 915 | cgd4_3970 | 0.866 | 0.878 | signal peptide plus transmembrane domain or GPI anchor, proline rich, acidic stretches                           |
| 916 | cgd7_5200 | 0.866 | 1.184 | 2-phosphoglycerate kinase involved in 2,3 diphosphoglycerate synthesis (P-loop kinase, distorted P-loop)         |
| 917 | cgd1_1010 | 0.866 | 1.126 | hypothetical protein                                                                                             |
| 918 | cgd2_520  | 0.866 | 0.916 | mitochondrial phosphate translocator                                                                             |
| 919 | cgd1_1080 | 0.866 | 0.931 | alpha beta hydrolase                                                                                             |
| 920 | cgd1_700  | 0.866 | 1.146 | ATP-binding cassette protein                                                                                     |
| 921 | cgd6_4910 | 0.865 | 1.025 | F11M21.28-like protein with 3 CCCH RNA binding domains, involved in RNA metabolism                               |
| 922 | cgd1_1440 | 0.865 | 0.983 | hypothetical protein                                                                                             |
| 923 | cgd6_3760 | 0.865 | 0.897 | hypothetical protein                                                                                             |
| 924 | cgd2_1400 | 0.864 | 0.910 | hypothetical protein                                                                                             |
| 925 | cgd8_2840 | 0.864 | 1.122 | hypothetical protein                                                                                             |
| 926 | cgd2_400  | 0.864 | 1.044 | signal peptide, serine stretches, possible low mw mucin glycoprotein locus of 6 genes                            |
| 927 | cgd2_3050 | 0.864 | 1.033 | hypothetical protein                                                                                             |
| 928 | cgd5_2850 | 0.864 | 0.920 | hypothetical protein                                                                                             |
| 929 | cgd2_1160 | 0.864 | 1.135 | HSPC021/HSPC025 family protein                                                                                   |
| 930 | cgd1_2650 | 0.864 | 0.970 | hypothetical protein                                                                                             |
| 931 | cgd5_4360 | 0.863 | 0.983 | large protein with possible RING domain                                                                          |
| 932 | cgd4_1260 | 0.863 | 1.078 | possible tRNA-INTRON ENDONUCLEASE                                                                                |
| 933 | cgd6_5000 | 0.863 | 0.928 | phosphoprotein phosphatase 2A 65K regulatory chain-like with HEAT repeats                                        |
| 934 | cgd8_1120 | 0.863 | 0.894 | HBS1 eRF5. GTPase. (RNA metabolism; translation)                                                                 |
| 935 | cgd2_3950 | 0.863 | 1.070 | putative translation elongation factor 1 beta 1                                                                  |
| 936 | cgd7_3550 | 0.863 | 1.029 | conserved hypothetical protein                                                                                   |
| 937 | cgd7_3480 | 0.862 | 0.946 | cytidylyltransferase (HIGH family) exon-1                                                                        |
| 938 | cgd1_70   | 0.862 | 0.879 | hypothetical protein                                                                                             |
| 939 | cgd6_1140 | 0.862 | 0.920 | hypothetical protein                                                                                             |
| 940 | cgd7_950  | 0.861 | 1.158 | putative Sec61; signal peptide plus 9 transmembrane domain-containing protein                                    |
| 941 | cgd2_4290 | 0.861 | 0.918 | hypothetical protein                                                                                             |
| 942 | cgd1_990  | 0.861 | 1.159 | pyridine nucleotide/ NAD(P) transhydrogenase alpha plus beta subunits, duplicated gene, 12 transmembrane domain  |
| 943 | cgd2_80   | 0.861 | 1.008 | ABC transporter family protein, 2x AAA domain                                                                    |
| 944 | cgd3_4310 | 0.861 | 0.983 | sexual stage-specific protein kinase                                                                             |
| 945 | cgd6_330  | 0.860 | 0.841 | hypothetical protein                                                                                             |
| 946 | cgd1_320  | 0.860 | 1.048 | oxysterol binding protein                                                                                        |
| 947 | cgd3_4070 | 0.860 | 1.074 | putative sugar transporter with 12 transmembrane domains                                                         |
| 948 | cgd3_1630 | 0.859 | 1.002 | hypothetical protein                                                                                             |
| 949 | cgd4_410  | 0.859 | 0.945 | protein with 4xEZ_heat domains                                                                                   |
| 950 | cgd7_790  | 0.858 | 0.925 | hypothetical protein                                                                                             |
| 951 | cgd5_3350 | 0.858 | 1.031 | hypothetical protein                                                                                             |
| 952 | cgd7_5470 | 0.858 | 0.915 | uncharacterized protein                                                                                          |
| 953 | cgd1_1620 | 0.858 | 1.054 | RPB7 like OB fold RNA polymerase subunit                                                                         |
| 954 | cgd8_4820 | 0.858 | 0.988 | hypothetical protein                                                                                             |
| 955 | cgd3_3010 | 0.857 | 0.968 | hypothetical protein                                                                                             |
| 956 | cgd7_1560 | 0.857 | 1.027 | DHHC family palmitoyl transferase with a signal peptide and 4 transmembrane domains                              |
| 957 | cgd8_3310 | 0.857 | 1.057 | S. cerevisiae Ylr022cp like protein that has a C2H2 zinc finger and is a component of the exosome                |
| 958 | cgd4_1200 | 0.857 | 0.925 | ubiquitin fusion degradation protein (UFD1); double Psi beta barrel fold                                         |
| 959 | cgd5_3010 | 0.857 | 0.987 | hypothetical protein with possible plus3 domain                                                                  |
| 960 | cgd7_4130 | 0.857 | 1.025 | Ynl022cp-like. SUN family methylase                                                                              |
| 961 | cgd7_1340 | 0.856 | 1.000 | conserved hypothetical protein                                                                                   |
| 962 | cgd2_230  | 0.856 | 1.127 | phosphatidylinositol phosphate phosphatase, putative                                                             |
| 963 | cgd4_1420 | 0.856 | 0.906 | hypothetical protein                                                                                             |

|      |           |       |       |                                                                                                                                              |
|------|-----------|-------|-------|----------------------------------------------------------------------------------------------------------------------------------------------|
| 964  | cgd4_420  | 0.855 | 0.855 | signal peptide + 4 transmembrane domain protein                                                                                              |
| 965  | cgd7_4580 | 0.855 | 0.977 | U6 snRNA-associated Sm-like protein LSm5. SM domain                                                                                          |
| 966  | cgd7_5320 | 0.854 | 0.826 | Cwf5-like with 2 ZnR domains (CCCH and RRM domains missing)                                                                                  |
| 967  | cgd7_1590 | 0.854 | 0.919 | uracil-DNA glycosylase, putative                                                                                                             |
| 968  | cgd5_2760 | 0.854 | 0.867 | hypothetical protein                                                                                                                         |
| 969  | cgd4_2150 | 0.854 | 0.862 | hypothetical protein                                                                                                                         |
| 970  | cgd3_2680 | 0.854 | 0.968 | possible signal peptidase subunit, signal peptide                                                                                            |
| 971  | cgd4_2000 | 0.853 | 1.031 | apicomplexan CP 15/60K like protein                                                                                                          |
| 972  | cgd1_3630 | 0.853 | 0.910 | conserved hypothetical protein                                                                                                               |
| 973  | cgd4_1440 | 0.853 | 1.122 | apicomplexan specific protein                                                                                                                |
| 974  | cgd3_4160 | 0.853 | 0.820 | conserved hypothetical protein                                                                                                               |
| 975  | cgd7_1410 | 0.853 | 1.037 | AAA domain containing protein                                                                                                                |
| 976  | cgd1_2510 | 0.852 | 1.085 | hypothetical protein, transmembrane domain within N-terminus                                                                                 |
| 977  | cgd1_2700 | 0.852 | 0.987 | methionine aminopeptidase with MYND finger at N-terminus                                                                                     |
| 978  | cgd8_2220 | 0.852 | 1.036 | hypothetical protein with a domain with conserved cysteines shared in dictyostelium, leishmania and plants                                   |
| 979  | cgd5_4320 | 0.852 | 1.073 | frataxin like protein                                                                                                                        |
| 980  | cgd6_3020 | 0.852 | 0.963 | hypothetical protein with 8 transmembrane domains                                                                                            |
| 981  | cgd2_1130 | 0.852 | 0.933 | hypothetical protein                                                                                                                         |
| 982  | cgd1_2440 | 0.851 | 1.196 | eukaryotic orthologous group, signal peptide                                                                                                 |
| 983  | cgd7_2040 | 0.850 | 0.902 | small nuclear ribonucleo protein                                                                                                             |
| 984  | cgd4_2470 | 0.850 | 0.959 | hypothetical protein with a signal peptide, gene within locus of signal-peptide containing hypothetical proteins                             |
| 985  | cgd3_330  | 0.850 | 1.017 | scully CG7113-PA, putative                                                                                                                   |
| 986  | cgd3_1510 | 0.850 | 1.052 | cyclin-dependent kinase 3, putative                                                                                                          |
| 987  | cgd8_2480 | 0.850 | 1.079 | signal peptide plus possible transmembrane domain paralogs                                                                                   |
| 988  | cgd8_3210 | 0.849 | 1.076 | UvrD like super family I helicase involved in nucleotide excision repair, possible bacterial horizontal transfer                             |
| 989  | cgd6_1510 | 0.849 | 0.886 | hypothetical protein with 6 transmembrane domains                                                                                            |
| 990  | cgd5_4400 | 0.849 | 0.870 | RIKEN cDNA 2610011N19 gen                                                                                                                    |
| 991  | cgd4_70   | 0.849 | 1.042 | conserved hypothetical protein                                                                                                               |
| 992  | cgd3_2300 | 0.849 | 0.926 | hypothetical protein with transmembrane domain within C-terminus                                                                             |
| 993  | cgd6_1460 | 0.849 | 0.971 | SEC14 domain containing protein                                                                                                              |
| 994  | cgd3_3970 | 0.848 | 0.867 | Yer007c-ap/MCT-1 like PUA RNA binding domain containing protein                                                                              |
| 995  | cgd4_1840 | 0.848 | 0.928 | Dbp7p, eIF4A-a-family RNA SFII helicase (DEXDc+HELICc)                                                                                       |
| 996  | cgd4_2700 | 0.848 | 1.194 | probable NADPH-cytochrome p450 reductase                                                                                                     |
| 997  | cgd6_2530 | 0.848 | 0.835 | hypothetical protein                                                                                                                         |
| 998  | cgd7_460  | 0.848 | 0.849 | P-type ATPase 3; integral membrane protein with signal peptide and 12 or more transmembrane domains; possible MgtA, cation transport ATPase. |
| 999  | cgd5_820  | 0.847 | 1.037 | calcium/calmodulin dependent protein kinase with a kinase domain and 4 calmodulin like EF hands                                              |
| 1000 | cgd1_2750 | 0.847 | 1.185 | AAA superfamily ATPase                                                                                                                       |
| 1001 | cgd3_1200 | 0.847 | 0.837 | possible prefoldin-related protein                                                                                                           |
| 1002 | cgd3_2640 | 0.847 | 1.005 | hypothetical protein with conserved domain                                                                                                   |
| 1003 | cgd8_180  | 0.847 | 0.944 | hypothetical protein                                                                                                                         |
| 1004 | cgd6_2110 | 0.846 | 0.938 | hypothetical protein                                                                                                                         |
| 1005 | cgd3_3420 | 0.846 | 1.123 | protein with 2x EF hands and 4 transmembrane regions                                                                                         |
| 1006 | cgd5_2970 | 0.846 | 0.834 | hypothetical protein                                                                                                                         |
| 1007 | cgd3_1730 | 0.846 | 1.051 | conserved hypothetical protein                                                                                                               |
| 1008 | cgd6_4320 | 0.846 | 0.891 | 40S ribosomal protein S5                                                                                                                     |
| 1009 | cgd4_1310 | 0.846 | 0.981 | hypothetical protein with transmembrane domain                                                                                               |
| 1010 | cgd2_170  | 0.846 | 0.915 | 40s ribosomal protein s24                                                                                                                    |
| 1011 | cgd8_1440 | 0.846 | 0.961 | nucleotide sugar transporter like integral membrane protein with 9 transmembrane domains                                                     |
| 1012 | cgd7_370  | 0.846 | 1.076 | protein with a conserved N-terminal region                                                                                                   |
| 1013 | cgd5_3510 | 0.845 | 0.928 | co-chaperone GrpE, putative                                                                                                                  |
| 1014 | cgd5_830  | 0.845 | 1.084 | membrane associated protein with a transmembrane domain near C-terminus                                                                      |
| 1015 | cgd4_1470 | 0.845 | 1.023 | vacuolar proton translocating ATPase with 7 transmembrane regions near C-terminus                                                            |
| 1016 | cgd5_100  | 0.845 | 0.972 | RRPp/PMC2 like exosome 3'-5' exoribonuclease subunit with an RNaseD domain and an HRDc domain                                                |
| 1017 | cgd2_3760 | 0.844 | 0.988 | conserved hypothetical protein                                                                                                               |
| 1018 | cgd2_3830 | 0.844 | 0.914 | hypothetical protein                                                                                                                         |
| 1019 | cgd8_310  | 0.844 | 0.962 | hypothetical protein                                                                                                                         |
| 1020 | cgd2_2000 | 0.843 | 0.877 | apicomplexan protein with signal peptide and 3 transmembrane domains                                                                         |
| 1021 | cgd2_50   | 0.842 | 0.882 | SIK1 nucleolar protein Nop56                                                                                                                 |
| 1022 | cgd5_3720 | 0.842 | 0.928 | 40S ribosomal protein S17                                                                                                                    |
| 1023 | cgd5_1580 | 0.842 | 0.973 | hypothetical protein                                                                                                                         |
| 1024 | cgd6_4700 | 0.842 | 0.997 | ATP-binding cassette transporter                                                                                                             |
| 1025 | cgd2_1420 | 0.841 | 0.876 | hypothetical protein                                                                                                                         |
| 1026 | cgd2_4220 | 0.841 | 1.105 | hypothetical protein                                                                                                                         |

|      |           |       |       |                                                                                                                       |
|------|-----------|-------|-------|-----------------------------------------------------------------------------------------------------------------------|
| 1027 | cgd8_3530 | 0.840 | 1.039 | predicted secreted protein                                                                                            |
| 1028 | cgd4_1520 | 0.840 | 0.818 | Brx1p nucleolar protein required for biogenesis of the 60S ribosomal subunit                                          |
| 1029 | cgd7_3310 | 0.840 | 0.857 | hypothetical protein                                                                                                  |
| 1030 | cgd7_3590 | 0.840 | 1.043 | Mpp10 family of U3 processosome protein                                                                               |
| 1031 | cgd4_3610 | 0.840 | 0.937 | hypothetical protein with signal peptide                                                                              |
| 1032 | cgd5_4370 | 0.839 | 0.965 | conserved hypothetical protein                                                                                        |
| 1033 | cgd7_1700 | 0.838 | 1.018 | histone H2B                                                                                                           |
| 1034 | cgd4_1140 | 0.838 | 1.029 | conserved hypothetical protein                                                                                        |
| 1035 | cgd2_3780 | 0.838 | 0.879 | uncharacterized protein rich in Thr and Ser residues                                                                  |
| 1036 | cgd6_4720 | 0.838 | 0.926 | hypothetical protein                                                                                                  |
| 1037 | cgd3_2330 | 0.837 | 0.908 | hypothetical protein                                                                                                  |
| 1038 | cgd2_2910 | 0.837 | 0.998 | large WD repeat protein                                                                                               |
| 1039 | cgd1_1120 | 0.837 | 0.940 | epsin like ENTH domain (alpha-alpha superhelix)involved in vesicular transport                                        |
| 1040 | cgd3_3860 | 0.836 | 1.023 | coiled coil protein                                                                                                   |
| 1041 | cgd1_30   | 0.836 | 0.817 | predicted membrane protein with 12+transmembrane domain                                                               |
| 1042 | cgd1_1910 | 0.836 | 1.023 | predicted DNAJ protein                                                                                                |
| 1043 | cgd6_270  | 0.836 | 1.024 | hypothetical protein                                                                                                  |
| 1044 | cgd2_3570 | 0.836 | 0.801 | YjbN-like Dus1p tRNA dihydouriding synthase Tim barrel                                                                |
| 1045 | cgd2_1680 | 0.836 | 0.978 | hypothetical protein                                                                                                  |
| 1046 | cgd2_3380 | 0.835 | 0.992 | conserved hypothetical protein                                                                                        |
| 1047 | cgd4_1580 | 0.835 | 0.916 | Spb1p-like, FtsJ methylase                                                                                            |
| 1048 | cgd8_1300 | 0.834 | 0.896 | Smc like ABC ATPase involved in DNA repair                                                                            |
| 1049 | cgd6_4130 | 0.834 | 0.887 | conserved hypothetical protein                                                                                        |
| 1050 | cgd5_3940 | 0.834 | 0.864 | hypothetical protein, possible apicomplexan-specific                                                                  |
| 1051 | cgd8_3540 | 0.834 | 0.974 | predicted secreted protein                                                                                            |
| 1052 | cgd3_4020 | 0.833 | 0.856 | eIF-3 p25/subunit 11                                                                                                  |
| 1053 | cgd2_3270 | 0.832 | 0.946 | phosphoglucomutase, tandemly duplicated gene                                                                          |
| 1054 | cgd5_2730 | 0.832 | 0.937 | hypothetical protein                                                                                                  |
| 1055 | cgd6_4540 | 0.832 | 1.119 | DHHC family palmitoyl transferase                                                                                     |
| 1056 | cgd1_2010 | 0.832 | 0.934 | hypothetical low complexity coiled coil                                                                               |
| 1057 | cgd2_160  | 0.832 | 0.833 | IMP4-like U3 small nucleolar ribonucleoprotein (snRNP)                                                                |
| 1058 | cgd8_520  | 0.831 | 1.091 | signal peptide containing protien                                                                                     |
| 1059 | cgd4_2670 | 0.831 | 1.018 | FRP1 like protein involved in DNA repair with a FAT domain and a phosphatidylinositol kinase domain at the C-terminus |
| 1060 | cgd4_1530 | 0.831 | 0.807 | conserved protein                                                                                                     |
| 1061 | cgd3_3680 | 0.831 | 0.945 | UIM domain and EF hand containing protein that also has a conserved domain between                                    |
| 1062 | cgd4_1210 | 0.830 | 0.927 | Ms15p; KH + 2 Znknuckle (C2HC)                                                                                        |
| 1063 | cgd6_2500 | 0.830 | 1.024 | hypothetical protein with possible signal peptide                                                                     |
| 1064 | cgd7_5310 | 0.830 | 0.947 | 60S ribosomal protein L24                                                                                             |
| 1065 | cgd3_2210 | 0.830 | 1.027 | replication protein A1 large subunit                                                                                  |
| 1066 | cgd7_1070 | 0.830 | 0.821 | snRNP core protein                                                                                                    |
| 1067 | cgd7_400  | 0.830 | 0.941 | hypothetical protein, signal peptide                                                                                  |
| 1068 | cgd2_1910 | 0.830 | 1.027 | putative phosphatidylinositol-4-phosphate 5-kinase, MORN beta hairpin repeats glycine-rich protein                    |
| 1069 | cgd6_2790 | 0.830 | 1.003 | kinesin heavy chain, putative                                                                                         |
| 1070 | cgd2_4370 | 0.830 | 0.972 | signal peptide                                                                                                        |
| 1071 | cgd2_4300 | 0.829 | 1.011 | Maf protein like, involved in RNA metabolism                                                                          |
| 1072 | cgd5_3980 | 0.828 | 0.987 | hypothetical protein with possible transmembrane domain near N-terminus                                               |
| 1073 | cgd4_1010 | 0.828 | 1.155 | hypothetical protein                                                                                                  |
| 1074 | cgd2_2060 | 0.828 | 0.948 | possible transcription factor TFIIH                                                                                   |
| 1075 | cgd7_4570 | 0.827 | 1.154 | DID domain proteins (DID4/DID2 family)                                                                                |
| 1076 | cgd1_420  | 0.826 | 0.927 | 20S proteasome beta subunit D2 (PBD2) , putative                                                                      |
| 1077 | cgd8_500  | 0.826 | 0.845 | caltractin, centrin                                                                                                   |
| 1078 | cgd7_3580 | 0.826 | 0.927 | kelch repeats protein                                                                                                 |
| 1079 | cgd5_4050 | 0.826 | 0.956 | hypothetical protein with 4 transmembrane domains                                                                     |
| 1080 | cgd6_1060 | 0.825 | 1.149 | protein with spectrin repeats, CG12008-like                                                                           |
| 1081 | cgd4_160  | 0.825 | 1.004 | hypothetical protein, possible transmembrane domain within N-terminus                                                 |
| 1082 | cgd3_2870 | 0.825 | 0.856 | putative acyl-CoA synthetases                                                                                         |
| 1083 | cgd8_4880 | 0.825 | 1.022 | 3 transmembrane region protein                                                                                        |
| 1084 | cgd7_570  | 0.825 | 0.950 | protein with 2 TPR domains                                                                                            |
| 1085 | cgd2_3040 | 0.825 | 1.063 | hypothetical protein                                                                                                  |
| 1086 | cgd8_2450 | 0.824 | 0.910 | formin homology 2 domain (FH2) protein                                                                                |
| 1087 | cgd3_730  | 0.824 | 1.057 | conserved expressed protein                                                                                           |
| 1088 | cgd8_1490 | 0.824 | 1.008 | bacterial type serine/tyrosine phosphatase                                                                            |
| 1089 | cgd7_2070 | 0.823 | 0.859 | large membrane associated channel                                                                                     |
| 1090 | cgd2_3030 | 0.823 | 1.092 | hypothetical protein, signal peptide                                                                                  |
| 1091 | cgd5_1030 | 0.823 | 0.982 | apicomplexan conserved protein                                                                                        |
| 1092 | cgd7_4550 | 0.823 | 1.054 | ubiquitin-like protein, putative                                                                                      |

|      |           |       |       |                                                                                                                                                            |
|------|-----------|-------|-------|------------------------------------------------------------------------------------------------------------------------------------------------------------|
| 1093 | cgd2_970  | 0.822 | 1.022 | hypothetical protein                                                                                                                                       |
| 1094 | cgd7_2500 | 0.822 | 1.093 | Skp1 family protein, putative                                                                                                                              |
| 1095 | cgd2_3690 | 0.822 | 0.976 | WD repeat protein                                                                                                                                          |
| 1096 | cgd6_3490 | 0.822 | 0.934 | RNA-binding protein, putative                                                                                                                              |
| 1097 | cgd4_1550 | 0.822 | 0.800 | conserved hypothetical protein                                                                                                                             |
| 1098 | cgd2_3970 | 0.821 | 0.923 | RRM domain containing protein                                                                                                                              |
| 1099 | cgd4_520  | 0.821 | 1.042 | hypothetical protein                                                                                                                                       |
| 1100 | cgd2_2730 | 0.821 | 0.883 | Po1 beta superfamily nucleotidyltransferase                                                                                                                |
| 1101 | cgd1_580  | 0.821 | 0.854 | dynammin-like protein                                                                                                                                      |
| 1102 | cgd3_3720 | 0.820 | 0.829 | hypothetical protein                                                                                                                                       |
| 1103 | cgd1_520  | 0.820 | 0.974 | vacuolar ATP synthetase subunit                                                                                                                            |
| 1104 | cgd3_3500 | 0.820 | 0.854 | Nop12p nucleolar protein, RRM domain                                                                                                                       |
| 1105 | cgd7_490  | 0.820 | 0.891 | hypothetical protein                                                                                                                                       |
| 1106 | cgd7_1430 | 0.820 | 0.826 | possible phosphodiesterase/alkaline phosphatase D, of possible plant or bacterial origin                                                                   |
| 1107 | cgd5_370  | 0.820 | 0.809 | predicted coiled coil protein                                                                                                                              |
| 1108 | cgd1_310  | 0.820 | 1.010 | AP endonuclease of the TIM barrel fold, possible bacterial horizontal transfer                                                                             |
| 1109 | cgd2_3930 | 0.819 | 0.895 | deoxyhypusine synthase                                                                                                                                     |
| 1110 | cgd4_1770 | 0.819 | 0.986 | hypothetical protein                                                                                                                                       |
| 1111 | cgd1_140  | 0.818 | 0.957 | conserved hypothetical protein                                                                                                                             |
| 1112 | cgd7_2410 | 0.818 | 0.989 | signal peptide, secreted low complexity protein                                                                                                            |
| 1113 | cgd8_50   | 0.818 | 0.913 | signal peptide, predicted secreted protein of cryptosporidium-specific FGLN gene family                                                                    |
| 1114 | cgd7_3920 | 0.818 | 0.910 | hypothetical protein                                                                                                                                       |
| 1115 | cgd5_1450 | 0.817 | 1.041 | hypothetical protein with signal peptide                                                                                                                   |
| 1116 | cgd3_1220 | 0.817 | 0.996 | hypothetical protein                                                                                                                                       |
| 1117 | cgd5_2740 | 0.817 | 0.948 | conserved hypothetical protein                                                                                                                             |
| 1118 | cgd3_1500 | 0.817 | 0.999 | hypothetical protein                                                                                                                                       |
| 1119 | cgd5_3550 | 0.817 | 0.951 | possible glycolipid transfer protein                                                                                                                       |
| 1120 | cgd6_820  | 0.817 | 0.843 | predicted secreted low complexity protein with a signal peptide                                                                                            |
| 1121 | cgd8_580  | 0.816 | 1.115 | ubiquitin-conjugating enzyme E2, putative                                                                                                                  |
| 1122 | cgd4_2280 | 0.816 | 0.963 | hypothetical protein                                                                                                                                       |
| 1123 | cgd7_2580 | 0.816 | 0.942 | AMSJ/WSAK like polysaccharide polymerase (glycosyltransferase family)                                                                                      |
| 1124 | cgd1_3850 | 0.816 | 0.889 | signal peptide, possible 4-5x transmembrane domain, SKSR family paralog, telomeric gene                                                                    |
| 1125 | cgd4_4480 | 0.816 | 1.051 | putative secreted, membrane-associated protein                                                                                                             |
| 1126 | cgd6_1470 | 0.816 | 0.993 | protein with SET domain flanked by cysteine clusters plus a C-terminal PHD domain                                                                          |
| 1127 | cgd8_5320 | 0.815 | 0.957 | Ser/Thr protein kinase                                                                                                                                     |
| 1128 | cgd2_2200 | 0.815 | 1.020 | 60S ribosomal protein L37                                                                                                                                  |
| 1129 | cgd7_500  | 0.814 | 0.867 | hypothetical protein                                                                                                                                       |
| 1130 | cgd7_1940 | 0.814 | 0.873 | coiled coil protein                                                                                                                                        |
| 1131 | cgd6_4080 | 0.814 | 1.036 | conserved hypothetical protein                                                                                                                             |
| 1132 | cgd6_5140 | 0.814 | 1.016 | ERGIC-53-like mannose binding lectin that is a type I membrane protein, transmembrane domain near C, signal peptide                                        |
| 1133 | cgd8_280  | 0.813 | 0.863 | apcomplexan conserved protein                                                                                                                              |
| 1134 | cgd2_1430 | 0.813 | 1.028 | dynactin subunit p62, putative                                                                                                                             |
| 1135 | cgd7_3490 | 0.813 | 0.888 | conserved hypothetical protein                                                                                                                             |
| 1136 | cgd8_1530 | 0.813 | 0.946 | ubiquitin carboxyl terminal hydrolase domain that is fused to a MATH domain                                                                                |
| 1137 | cgd7_2570 | 0.812 | 0.895 | adrift-like. FTSJ family RNA methylase                                                                                                                     |
| 1138 | cgd7_2450 | 0.812 | 0.946 | possible membrane associated transporter                                                                                                                   |
| 1139 | cgd4_660  | 0.812 | 0.869 | Nip7 like PUA domain containing protein involved in ribosomal biogenesis                                                                                   |
| 1140 | cgd6_4960 | 0.811 | 1.042 | serine/threonine-protein kinase, putative                                                                                                                  |
| 1141 | cgd2_710  | 0.811 | 0.832 | predicted protease                                                                                                                                         |
| 1142 | cgd8_4300 | 0.811 | 0.982 | hypothetical protein                                                                                                                                       |
| 1143 | cgd2_2120 | 0.811 | 1.009 | high mobility group small protein                                                                                                                          |
| 1144 | cgd1_250  | 0.810 | 0.943 | ATP-dependent RNA helicase, putative                                                                                                                       |
| 1145 | cgd5_3790 | 0.810 | 0.813 | SNF7 ortholog                                                                                                                                              |
| 1146 | cgd6_4570 | 0.810 | 0.865 | glutamate synthetase, possible bacterial origin, beta-grasp+glutamate synthase catalytic domain                                                            |
| 1147 | cgd5_2190 | 0.810 | 0.942 | Nuc1p like endonuclease G                                                                                                                                  |
| 1148 | cgd2_2640 | 0.810 | 0.902 | hypothetical protein                                                                                                                                       |
| 1149 | cgd6_4770 | 0.810 | 1.059 | conserved hypothetical protein                                                                                                                             |
| 1150 | cgd4_1590 | 0.809 | 0.919 | chromodomain-helicase-DNA-binding <sup>1</sup> multidomain chromatin protein with the following architecture: chromo-bromo-chromo-SNF2 ATPase <sup>1</sup> |
| 1151 | cgd3_1090 | 0.809 | 0.896 | Rrp9p/U3-55K-family snoRNP-associated protein with several WD40 repeats                                                                                    |
| 1152 | cgd7_1360 | 0.809 | 0.902 | protein with signal peptide and Sec14d domain, probably secreted                                                                                           |
| 1153 | cgd3_1710 | 0.809 | 0.889 | conserved hypothetical protein                                                                                                                             |
| 1154 | cgd7_2380 | 0.809 | 1.031 | RRP45-like archaeo-eukaryotic exosomal rnase, PH domain                                                                                                    |
| 1155 | cgd1_790  | 0.808 | 1.031 | leucine rich repeats, coiled coil                                                                                                                          |
| 1156 | cgd8_700  | 0.808 | 0.999 | predicted secreted protein, signal peptide with several threonines, possible mucin                                                                         |
| 1157 | cgd7_2560 | 0.808 | 1.015 | Sgd1p; NIC plus MI domains containing protein involved in RNA metabolism                                                                                   |



|      |           |       |       |                                                                             |
|------|-----------|-------|-------|-----------------------------------------------------------------------------|
| 1158 | cgd8_3280 | 0.808 | 0.957 | phosphatidylinositol-4-phosphate 5-kinase, putative                         |
| 1159 | cgd2_860  | 0.808 | 1.141 | Pre3p/proteasome regulatory subunit beta type 6, NTN hydrolase fold         |
| 1160 | cgd1_600  | 0.808 | 1.006 | oxoglutarate/malate translocator protein                                    |
| 1161 | cgd5_3650 | 0.807 | 1.024 | hypothetical protein                                                        |
| 1162 | cgd6_4460 | 0.806 | 0.942 | large protein with ARM repeats                                              |
| 1163 | cgd5_3660 | 0.806 | 0.812 | hypothetical conserved protein                                              |
| 1164 | cgd8_1760 | 0.805 | 0.985 | secreted protein, signal peptide                                            |
| 1165 | cgd5_2980 | 0.805 | 0.812 | hypothetical protein                                                        |
| 1166 | cgd7_5450 | 0.805 | 1.063 | conserved hypothetical protein                                              |
| 1167 | cgd2_1190 | 0.805 | 0.952 | methylase                                                                   |
| 1168 | cgd2_3980 | 0.804 | 0.943 | Myb domain containing protein                                               |
| 1169 | cgd1_3580 | 0.804 | 0.917 | hypothetical protein                                                        |
| 1170 | cgd3_4280 | 0.804 | 0.967 | secreted insulinase like peptidase, signal peptide                          |
| 1171 | cgd3_3230 | 0.804 | 0.930 | Ser/thr protein kinase                                                      |
| 1172 | cgd1_300  | 0.803 | 0.931 | 40S ribosomal protein S21                                                   |
| 1173 | cgd2_1340 | 0.803 | 1.103 | possible phosphatidylinositol 3- and 4-kinase family protein                |
| 1174 | cgd6_4070 | 0.803 | 0.932 | hypothetical protein                                                        |
| 1175 | cgd1_3270 | 0.803 | 0.811 | hypothetical protein                                                        |
| 1176 | cgd7_170  | 0.803 | 0.890 | hypothetical protein                                                        |
| 1177 | cgd1_20   | 0.803 | 0.892 | predicted membrane associated protein with 11 transmembrane domains regions |
| 1178 | cgd6_1570 | 0.802 | 0.962 | apyrase; calcium-activated nucleotidase SCAN-1-like protein; signal peptide |
| 1179 | cgd7_4180 | 0.802 | 0.945 | hypothetical protein                                                        |
| 1180 | cgd8_4510 | 0.801 | 0.897 | hypothetical protein                                                        |
| 1181 | cgd6_5420 | 0.801 | 0.843 | hypothetical protein, signal peptide                                        |
| 1182 | cgd5_1860 | 0.800 | 1.002 | conserved hypothetical protein                                              |
| 1183 | cgd8_3450 | 0.800 | 1.011 | 60S ribosomal protein L17                                                   |

| <b>Cluster 6</b>                                                                |           |                      |                    |                                                                                                                                                                              |
|---------------------------------------------------------------------------------|-----------|----------------------|--------------------|------------------------------------------------------------------------------------------------------------------------------------------------------------------------------|
| <b>0.5 h: Normal (Ratio = 0.8-1.2) vs. 5 h: Down-regulated (Ratio &lt; 0.8)</b> |           |                      |                    |                                                                                                                                                                              |
| No.                                                                             | GeneID    | Signal Ratio (0.5 h) | Signal Ratio (5 h) | Description                                                                                                                                                                  |
| 1                                                                               | cgd8_2160 | 1.200                | 0.606              | shares a domain with poly(ADP) ribose glycohydrolases, some protein kinase A anchoring proteins and baculovirus HzNV Orf103, possible transmembrane domain within N-terminus |
| 2                                                                               | cgd7_1260 | 1.193                | 0.737              | calcium/calmodulin dependent protein kinase with an EF hand N-terminal to the kinase domain and 4 calmodulin like EF hands at the C-terminus                                 |
| 3                                                                               | cgd4_1460 | 1.190                | 0.760              | hypothetical protein                                                                                                                                                         |
| 4                                                                               | cgd5_4270 | 1.180                | 0.543              | hypothetical protein with signal peptide and transmembrane region at C-terminus, possible N-terminal region transmembrane domain                                             |
| 5                                                                               | cgd5_3410 | 1.139                | 0.792              | possible phosphate/phosphoenolpyruvate translocator with 9 transmembrane domains                                                                                             |
| 6                                                                               | cgd6_1800 | 1.125                | 0.775              | acetyltransferase, GNAT family                                                                                                                                               |
| 7                                                                               | cgd1_820  | 1.119                | 0.606              | DHHC family palmitoyl transferases with 4 transmembrane domains                                                                                                              |
| 8                                                                               | cgd6_4430 | 1.098                | 0.589              | hypothetical protein                                                                                                                                                         |
| 9                                                                               | cgd2_1620 | 1.096                | 0.754              | hypothetical protein                                                                                                                                                         |
| 10                                                                              | cgd2_4060 | 1.086                | 0.587              | hypothetical protein with 12 transmembrane domains                                                                                                                           |
| 11                                                                              | cgd1_1400 | 1.069                | 0.770              | hypothetical protein                                                                                                                                                         |
| 12                                                                              | cgd1_260  | 1.067                | 0.787              | predicted secreted protein, signal peptide                                                                                                                                   |
| 13                                                                              | cgd5_4470 | 1.065                | 0.722              | CpTSP7; extracellular membrane associated protein with a signal peptide followed by 2 TSP1 repeats, an EGF domain and a transmembrane region                                 |
| 14                                                                              | cgd4_2350 | 1.064                | 0.752              | multitransmembrane protein with signal peptide and GMGPP repeat at C-terminus                                                                                                |
| 15                                                                              | cgd4_50   | 1.057                | 0.736              | hypothetical protein                                                                                                                                                         |
| 16                                                                              | cgd4_4320 | 1.046                | 0.733              | ORC/CDC6 like AAA+ ATPase                                                                                                                                                    |
| 17                                                                              | cgd2_2310 | 1.044                | 0.757              | Ser/Thr protein kinase                                                                                                                                                       |
| 18                                                                              | cgd6_320  | 1.040                | 0.769              | conserved hypothetical protein                                                                                                                                               |
| 19                                                                              | cgd6_2510 | 1.034                | 0.728              | farnesyltransferase                                                                                                                                                          |
| 20                                                                              | cgd2_3320 | 1.030                | 0.778              | secreted papain like protease, signal peptide                                                                                                                                |
| 21                                                                              | cgd6_2550 | 1.029                | 0.737              | conserved hypothetical protein                                                                                                                                               |
| 22                                                                              | cgd8_1610 | 1.029                | 0.774              | sacin like HSP90 chaperone domain, likely plant origin                                                                                                                       |
| 23                                                                              | cgd4_2060 | 1.028                | 0.736              | conserved hypothetical protein                                                                                                                                               |
| 24                                                                              | cgd8_2920 | 1.025                | 0.707              | Vps60p /Vps20p like protein involved in vacuolar protein sorting                                                                                                             |
| 25                                                                              | cgd1_1710 | 1.024                | 0.793              | phosphoglycerate mutase                                                                                                                                                      |
| 26                                                                              | cgd4_2100 | 1.021                | 0.623              | PIG-A like N-acetylglucosaminyl-phosphatidylinositol biosynthetic protein                                                                                                    |
| 27                                                                              | cgd5_2770 | 1.019                | 0.758              | ARF like small GTPase                                                                                                                                                        |
| 28                                                                              | cgd7_3860 | 1.017                | 0.692              | conserved hypothetical protein                                                                                                                                               |
| 29                                                                              | cgd4_960  | 1.005                | 0.595              | phosphomannomutase                                                                                                                                                           |
| 30                                                                              | cgd6_3620 | 1.005                | 0.793              | sf-assemblin; Low complexity protein                                                                                                                                         |
| 31                                                                              | cgd3_320  | 1.000                | 0.799              | N-myristoyltransferase                                                                                                                                                       |
| 32                                                                              | cgd6_2160 | 0.994                | 0.779              | hypothetical protein                                                                                                                                                         |
| 33                                                                              | cgd8_3780 | 0.992                | 0.787              | hypothetical protein                                                                                                                                                         |

|    |           |       |       |                                                                                                    |
|----|-----------|-------|-------|----------------------------------------------------------------------------------------------------|
| 34 | cgd8_2970 | 0.992 | 0.790 | glutathione S-transferase                                                                          |
| 35 | cgd6_5170 | 0.985 | 0.714 | hypothetical protein                                                                               |
| 36 | cgd6_4880 | 0.982 | 0.726 | cryptopain - cysteine proteinase secreted, possible transmembrane domain near N-terminus           |
| 37 | cgd5_280  | 0.979 | 0.626 | signal peptide containing protein with 6 transmembrane domains                                     |
| 38 | cgd6_290  | 0.979 | 0.549 | hypothetical protein                                                                               |
| 39 | cgd3_3600 | 0.977 | 0.756 | hypothetical protein                                                                               |
| 40 | cgd5_260  | 0.974 | 0.552 | hypothetical protein                                                                               |
| 41 | cgd8_1000 | 0.965 | 0.643 | hypothetical protein                                                                               |
| 42 | cgd7_3030 | 0.956 | 0.743 | importin/karyopherin                                                                               |
| 43 | cgd6_5470 | 0.952 | 0.735 | hypothetical protein, signal peptide, transmembrane domain with N-terminus                         |
| 44 | cgd8_2960 | 0.948 | 0.754 | NIC+MI domains containing protein. nucampholin/yeast Cwc22p like protein involved in mRNA splicing |
| 45 | cgd6_4970 | 0.948 | 0.747 | Hsp60; GroEL-like chaperone (ATPase), predicted mitochondrial                                      |
| 46 | cgd5_240  | 0.941 | 0.785 | G patch domain containing protein                                                                  |
| 47 | cgd7_1720 | 0.935 | 0.765 | endonuclease III, putative                                                                         |
| 48 | cgd4_350  | 0.933 | 0.653 | hypothetical protein with 7 transmembrane domains                                                  |
| 49 | cgd3_4120 | 0.925 | 0.800 | hypothetical protein                                                                               |
| 50 | cgd8_5020 | 0.924 | 0.745 | starch binding domain containing protein, possible plant origin                                    |
| 51 | cgd5_2890 | 0.917 | 0.737 | hypothetical protein                                                                               |
| 52 | cgd7_3170 | 0.915 | 0.799 | thioredoxin fold protein related to phosducin                                                      |
| 53 | cgd1_2940 | 0.909 | 0.673 | hypothetical protein                                                                               |
| 54 | cgd3_1470 | 0.905 | 0.787 | dual specificity phosphatase                                                                       |
| 55 | cgd7_2610 | 0.895 | 0.767 | POZ+kelch domain protein with kelch repeats at the C-terminus                                      |
| 56 | cgd4_4190 | 0.894 | 0.758 | hypothetical protein with signal peptide                                                           |
| 57 | cgd6_980  | 0.890 | 0.760 | SET domain containing protein                                                                      |
| 58 | cgd6_3500 | 0.874 | 0.771 | hypothetical protein                                                                               |
| 59 | cgd8_5270 | 0.873 | 0.770 | integral membrane protein predicted amino acid permease, 11x transmembrane domains                 |
| 60 | cgd3_3240 | 0.867 | 0.714 | hypothetical protein                                                                               |
| 61 | cgd5_4530 | 0.867 | 0.757 | conserved hypothetical protein                                                                     |
| 62 | cgd3_3280 | 0.866 | 0.753 | hypothetical protein                                                                               |
| 63 | cgd6_220  | 0.864 | 0.636 | hypothetical protein, possible G-patch domain                                                      |
| 64 | cgd2_2520 | 0.860 | 0.755 | hypothetical protein                                                                               |
| 65 | cgd5_4190 | 0.859 | 0.777 | hypothetical protein                                                                               |
| 66 | cgd1_3570 | 0.857 | 0.798 | myosin regulatory light chain                                                                      |
| 67 | cgd6_4020 | 0.856 | 0.591 | phosphodiesterase, putative                                                                        |
| 68 | cgd6_450  | 0.840 | 0.775 | hypothetical protein                                                                               |
| 69 | cgd2_1760 | 0.833 | 0.758 | gata/ArfGAP, putative                                                                              |
| 70 | cgd1_3300 | 0.825 | 0.765 | ring domain protein                                                                                |
| 71 | cgd7_690  | 0.823 | 0.750 | small nuclear ribonucleoprotein                                                                    |
| 72 | cgd4_990  | 0.820 | 0.692 | Ser/Thr protein kinase                                                                             |
| 73 | cgd4_1500 | 0.815 | 0.778 | hypothetical protein                                                                               |
| 74 | cgd8_720  | 0.813 | 0.781 | hypothetical protein                                                                               |
| 75 | cgd7_4070 | 0.803 | 0.691 | arsenical pump-driving ATPase                                                                      |
| 76 | cgd5_4570 | 0.803 | 0.784 | hypothetical protein                                                                               |
| 77 | cgd7_1060 | 0.800 | 0.783 | apicomplexan conserved protein with 2 or more transmembrane domains                                |

**Cluster 7 0.5 h: Down-regulated (Ratio < 0.8) vs. 5 h: Up-regulated (Ratio > 1.2)**

| No. | GeneID    | Signal Ratio (0.5 h) | Signal Ratio (5 h) | Description                                                                                            |
|-----|-----------|----------------------|--------------------|--------------------------------------------------------------------------------------------------------|
| 1   | cgd3_1490 | 0.799                | 1.288              | hypothetical protein                                                                                   |
| 2   | cgd8_1200 | 0.790                | 1.316              | E3A like HECT domain containing ubiquitin protein ligase                                               |
| 3   | cgd5_560  | 0.789                | 1.220              | hypothetical protein                                                                                   |
| 4   | cgd8_2460 | 0.752                | 1.239              | hypothetical protein with possible SAP domain                                                          |
| 5   | cgd7_1240 | 0.744                | 1.266              | hypothetical protein, transmembrane domain near N-terminus                                             |
| 6   | cgd6_2910 | 0.739                | 1.483              | hypothetical protein with signal peptide                                                               |
| 7   | cgd5_1090 | 0.732                | 1.268              | hypothetical protein                                                                                   |
| 8   | cgd7_3460 | 0.715                | 1.367              | hypothetical protein                                                                                   |
| 9   | cgd8_3920 | 0.710                | 1.275              | hypothetical protein, signal peptide, predicted membrane protein, transmembrane domain near C-terminus |
| 10  | cgd2_2140 | 0.627                | 1.211              | hypothetical protein with 14 transmembrane domains                                                     |
| 11  | cgd8_2760 | 0.582                | 1.260              | conserved hypothetical protein                                                                         |

**Cluster 8 0.5 h: Down-regulated (Ratio < 0.8) vs. 5 h: Normal (Ratio = 0.8 - 1.2)**

| No. | GeneID    | Signal Ratio (0.5 h) | Signal Ratio (5 h) | Description                                             |
|-----|-----------|----------------------|--------------------|---------------------------------------------------------|
| 1   | cgd2_3860 | 0.799                | 0.958              | BBOX Zn finger domain containing protein                |
| 2   | cgd2_3520 | 0.797                | 1.046              | conserved hypothetical protein                          |
| 3   | cgd3_4030 | 0.797                | 1.033              | hypothetical protein with 7 transmembrane domain domain |

|    |           |       |       |                                                                                                                   |
|----|-----------|-------|-------|-------------------------------------------------------------------------------------------------------------------|
| 4  | cgd3_240  | 0.796 | 0.997 | hypothetical protein                                                                                              |
| 5  | cgd7_1380 | 0.796 | 1.042 | conserved hypothetical protein                                                                                    |
| 6  | cgd3_190  | 0.795 | 1.032 | latent transforming growth factor beta binding protein like (3F865)                                               |
| 7  | cgd2_540  | 0.795 | 0.891 | hypothetical protein with 6 transmembrane domains                                                                 |
| 8  | cgd2_2390 | 0.795 | 0.997 | hypothetical protein with 8 transmembrane domains                                                                 |
| 9  | cgd5_2620 | 0.794 | 0.962 | penguin protein containing pumilio repeats                                                                        |
| 10 | cgd7_2220 | 0.794 | 0.819 | hypothetical protein                                                                                              |
| 11 | cgd7_5290 | 0.794 | 0.853 | hedgehog-type HINT domain protein, possible animal horizontal transfer, signal peptide                            |
| 12 | cgd2_3840 | 0.794 | 0.818 | hypothetical protein                                                                                              |
| 13 | cgd6_3450 | 0.793 | 0.804 | EBNA1 binding protein 2; nucleolar protein p40                                                                    |
| 14 | cgd3_2020 | 0.792 | 1.171 | PP2C like protein phosphatase                                                                                     |
| 15 | cgd5_4220 | 0.792 | 0.913 | membrane associated protein with a signal peptide, EGF domain and 7 transmembrane domains at the C-terminus       |
| 16 | cgd4_3630 | 0.791 | 0.853 | conserved hypothetical protein                                                                                    |
| 17 | cgd7_680  | 0.791 | 1.095 | hypothetical protein with a signal peptide                                                                        |
| 18 | cgd1_3140 | 0.790 | 0.898 | P-loop nucleotide (UMP) kinase                                                                                    |
| 19 | cgd8_2510 | 0.790 | 0.828 | Cyclin dependent kinase regulatory subunit, putative                                                              |
| 20 | cgd8_3090 | 0.790 | 0.883 | proteasome activator p28/ Ki autoantigen                                                                          |
| 21 | cgd3_920  | 0.789 | 1.045 | calmodulin-domain protein kinase 1, putative                                                                      |
| 22 | cgd1_280  | 0.788 | 1.029 | short chain dehydrogenase/reductase of the rossmann fold, signal peptide                                          |
| 23 | cgd4_3340 | 0.788 | 0.945 | pleckstrin homology (PH) domain containing protein                                                                |
| 24 | cgd2_950  | 0.788 | 0.828 | hypothetical protein                                                                                              |
| 25 | cgd2_2040 | 0.787 | 0.933 | hypothetical protein                                                                                              |
| 26 | cgd2_1880 | 0.787 | 0.812 | protein kinase, putative                                                                                          |
| 27 | cgd6_1610 | 0.787 | 0.940 | hypothetical protein                                                                                              |
| 28 | cgd7_1530 | 0.785 | 0.893 | ART-4 protein; PIN+Zn ribbon domains. involved in RNA metabolism                                                  |
| 29 | cgd7_1600 | 0.785 | 0.829 | ribosomal protein of the PO/L10 family                                                                            |
| 30 | cgd7_750  | 0.784 | 0.883 | hypothetical protein with signal peptide and transmembrane domain near C-terminus                                 |
| 31 | cgd6_3380 | 0.784 | 0.930 | Erf1 eukaryotic translation termination factor 1; N-terminal RNaseH plus pelota domain containing protein         |
| 32 | cgd5_3120 | 0.784 | 0.973 | hypothetical protein                                                                                              |
| 33 | cgd6_2130 | 0.784 | 1.094 | hypothetical protein with a C-terminus transmembrane domain                                                       |
| 34 | cgd8_2530 | 0.783 | 0.847 | sushi-domain containing secreted protein; with a signal peptide, low complexity region followed by a sushi domain |
| 35 | cgd1_1490 | 0.783 | 0.960 | NEK2 protein, putative                                                                                            |
| 36 | cgd8_4750 | 0.783 | 0.858 | Dbp5p-like eIF4A-1-family RNA SFII helicase                                                                       |
| 37 | cgd2_2540 | 0.783 | 1.003 | glutaredoxin related protein                                                                                      |
| 38 | cgd8_60   | 0.783 | 0.931 | signal peptide, possible transmembrane domain near N                                                              |
| 39 | cgd7_1420 | 0.781 | 0.868 | hypothetical protein                                                                                              |
| 40 | cgd5_1040 | 0.781 | 1.025 | arfgap'arfgap like finger domain containing protein'                                                              |
| 41 | cgd7_3070 | 0.780 | 0.852 | hypothetical protein, signal peptide, transmembrane domain near C-terminus                                        |
| 42 | cgd8_3140 | 0.780 | 0.884 | MRP like MinD family ATPase of the SIMIBI class of P-loop GTPases                                                 |
| 43 | cgd6_950  | 0.779 | 0.937 | Pdr17p-like Sec14 domain containing protein                                                                       |
| 44 | cgd5_1830 | 0.779 | 0.953 | F11M21.28-like 3 CCCH RNA binding domain protein involved in RNA metabolism                                       |
| 45 | cgd7_5140 | 0.779 | 0.868 | A surface protein with 2 conserved cysteines                                                                      |
| 46 | cgd1_3240 | 0.779 | 0.873 | large low complexity protein                                                                                      |
| 47 | cgd8_650  | 0.778 | 0.812 | 60S ribosomal protein L23A                                                                                        |
| 48 | cgd3_1160 | 0.778 | 1.010 | conserved hypothetical protein                                                                                    |
| 49 | cgd8_550  | 0.777 | 0.905 | large uncharacterized protein                                                                                     |
| 50 | cgd6_3520 | 0.777 | 0.933 | hypothetical protein                                                                                              |
| 51 | cgd3_180  | 0.776 | 0.947 | domain KOG1666, V-SNARE (intracellular trafficking, secretion, and vesicular transport)                           |
| 52 | cgd6_960  | 0.775 | 0.923 | cysteinyl-tRNA synthetase                                                                                         |
| 53 | cgd5_3960 | 0.774 | 0.988 | secreted protein of the alpha beta hydrolase superfamily                                                          |
| 54 | cgd5_3580 | 0.773 | 0.808 | putative transport protein                                                                                        |
| 55 | cgd6_20   | 0.773 | 0.869 | inosine-5-monophosphate dehydrogenase                                                                             |
| 56 | cgd4_2740 | 0.772 | 0.942 | IMP4 U3 small nucleolar ribonucleoprotein                                                                         |
| 57 | cgd7_4720 | 0.772 | 0.850 | hypothetical protein                                                                                              |
| 58 | cgd5_2110 | 0.772 | 0.860 | protein with conserved N-terminal localized cysteine-rich domain; predicted archaeo-eukaryotic ribosomal protein  |
| 59 | cgd2_10   | 0.772 | 0.946 | hypothetical protein                                                                                              |
| 60 | cgd3_1030 | 0.772 | 0.910 | uncharacterized low complexity protein                                                                            |
| 61 | cgd5_2750 | 0.772 | 1.023 | hypothetical protein, signal peptide                                                                              |
| 62 | cgd1_540  | 0.772 | 0.888 | vacuolar ATP synthase subunit, possible signal peptide                                                            |
| 63 | cgd4_3440 | 0.772 | 1.025 | hypothetical protein with signal peptide, within large locus of signal peptide containing proteins                |
| 64 | cgd5_1490 | 0.771 | 1.023 | large cysteine rich protein                                                                                       |
| 65 | cgd3_440  | 0.771 | 0.904 | C-type lectin containing protein with a transmembrane domain and mucin-like rich regions                          |
| 66 | cgd2_420  | 0.771 | 0.966 | signal peptide, serine proline rich, possible low mw mucin glycoprotein locus of 6 genes                          |

|     |           |       |       |                                                                                                                                         |
|-----|-----------|-------|-------|-----------------------------------------------------------------------------------------------------------------------------------------|
| 67  | cgd7_410  | 0.771 | 0.985 | hypothetical protein                                                                                                                    |
| 68  | cgd4_780  | 0.770 | 0.906 | DNA topoisomerase II                                                                                                                    |
| 69  | cgd4_4140 | 0.769 | 0.814 | conserved hypothetical protein                                                                                                          |
| 70  | cgd6_1080 | 0.768 | 1.014 | conserved hypothetical protein                                                                                                          |
| 71  | cgd5_3920 | 0.768 | 1.004 | calmodulin-like protein                                                                                                                 |
| 72  | cgd8_4530 | 0.767 | 0.903 | ribosomal processing protein, putative                                                                                                  |
| 73  | cgd6_5380 | 0.763 | 0.970 | conserved hypothetical protein                                                                                                          |
| 74  | cgd3_4080 | 0.762 | 1.071 | conserved protein with UAS domain, possible ubiquitin protein                                                                           |
| 75  | cgd5_3000 | 0.761 | 1.016 | hypothetical protein                                                                                                                    |
| 76  | cgd4_1640 | 0.761 | 0.968 | hypothetical protein                                                                                                                    |
| 77  | cgd1_1630 | 0.760 | 0.913 | hypothetical protein                                                                                                                    |
| 78  | cgd4_4110 | 0.760 | 0.835 | hypothetical conserved protein, possible transmembrane domain near C-terminus                                                           |
| 79  | cgd6_990  | 0.759 | 0.895 | U1 snrp Snp1p. RRM domain containing protein                                                                                            |
| 80  | cgd8_1910 | 0.758 | 0.946 | epsin like ENTH/VHS domain involved in endocytosis/vesicular trafficking                                                                |
| 81  | cgd8_4430 | 0.758 | 0.900 | translation initiation factor if-2 beta subunit ZnR                                                                                     |
| 82  | cgd6_2920 | 0.757 | 0.889 | hypothetical protein with signal peptide                                                                                                |
| 83  | cgd6_3950 | 0.756 | 0.942 | uncharacterized protein                                                                                                                 |
| 84  | cgd3_640  | 0.756 | 0.852 | acyl-CoA synthetase                                                                                                                     |
| 85  | cgd5_700  | 0.755 | 0.820 | musashi. RRM domain containing protein, splicing related                                                                                |
| 86  | cgd8_3100 | 0.755 | 1.010 | valyl-tRNA synthetase                                                                                                                   |
| 87  | cgd1_3620 | 0.754 | 0.993 | transcription factor TAF7p/TAFII55                                                                                                      |
| 88  | cgd6_180  | 0.754 | 0.872 | hypothetical protein                                                                                                                    |
| 89  | cgd8_4650 | 0.754 | 0.856 | hypothetical protein                                                                                                                    |
| 90  | cgd2_690  | 0.753 | 0.955 | large low complexity protein with glycine-rich repeats                                                                                  |
| 91  | cgd4_4400 | 0.753 | 0.828 | hypothetical protein                                                                                                                    |
| 92  | cgd2_1800 | 0.753 | 0.878 | heat shock 40 kDa protein, putative                                                                                                     |
| 93  | cgd1_3170 | 0.752 | 0.834 | large hypothetical protein, possible coiled coil domain at amino terminus                                                               |
| 94  | cgd1_190  | 0.752 | 0.902 | narf-like protein nuclear prelamin A recognition factor                                                                                 |
| 95  | cgd8_1670 | 0.752 | 0.882 | vacuolar ATP synthase subunit B                                                                                                         |
| 96  | cgd7_3190 | 0.752 | 1.008 | protein with 3 CCCH domains                                                                                                             |
| 97  | cgd6_3210 | 0.751 | 1.002 | Rok1p, eIF4A-1-family RNA SFII helicase                                                                                                 |
| 98  | cgd6_1230 | 0.751 | 0.975 | GTPase Grc3p-like Pre-mRNA cleavage complex                                                                                             |
| 99  | cgd7_550  | 0.750 | 0.849 | hypothetical protein with 9 transmembrane domains, possible apicomplexan-specific protein                                               |
| 100 | cgd4_1890 | 0.750 | 0.948 | adenosine monophosphate deaminase 2                                                                                                     |
| 101 | cgd1_460  | 0.749 | 1.027 | hypothetical protein                                                                                                                    |
| 102 | cgd8_5000 | 0.749 | 1.003 | hypothetical protein, possible conserved                                                                                                |
| 103 | cgd4_3920 | 0.749 | 0.809 | DinB/family X-type DNA polymerase                                                                                                       |
| 104 | cgd6_610  | 0.749 | 0.801 | ATP synthase alpha chain                                                                                                                |
| 105 | cgd6_1190 | 0.749 | 0.912 | DNAJ protein-like, putative                                                                                                             |
| 106 | cgd7_1740 | 0.749 | 0.930 | Ing1 like PHD finger protein                                                                                                            |
| 107 | cgd7_3270 | 0.748 | 0.919 | importin/karyopherin (Arm repeats)                                                                                                      |
| 108 | cgd4_4200 | 0.748 | 0.812 | 2xTPR domain containing protein                                                                                                         |
| 109 | cgd3_3840 | 0.748 | 0.984 | isoleucine-tRNA synthetase                                                                                                              |
| 110 | cgd4_1620 | 0.747 | 0.898 | hypothetical protein                                                                                                                    |
| 111 | cgd3_870  | 0.747 | 0.948 | flavoprotein, putative                                                                                                                  |
| 112 | cgd7_2690 | 0.745 | 0.871 | conserved hypothetical protein                                                                                                          |
| 113 | cgd4_3680 | 0.745 | 0.881 | hypothetical protein                                                                                                                    |
| 114 | cgd2_4120 | 0.744 | 1.076 | 20k cyclophilin, putative                                                                                                               |
| 115 | cgd2_3120 | 0.744 | 0.910 | possible transmembrane domain near N                                                                                                    |
| 116 | cgd3_4230 | 0.743 | 0.990 | hypothetical protein, signal peptide                                                                                                    |
| 117 | cgd7_4010 | 0.743 | 1.045 | hypothetical protein                                                                                                                    |
| 118 | cgd1_3720 | 0.743 | 0.879 | PIG-M mannosyltransferase,8 transmembrane domain                                                                                        |
| 119 | cgd7_2870 | 0.742 | 0.928 | uncharacterized low complexity protein                                                                                                  |
| 120 | cgd2_4160 | 0.740 | 0.977 | hypothetical protein having possible hemolytic activity                                                                                 |
| 121 | cgd6_3860 | 0.736 | 0.811 | SNF2 helicase, putative                                                                                                                 |
| 122 | cgd6_4230 | 0.736 | 0.887 | hypothetical protein containing a signal peptide                                                                                        |
| 123 | cgd4_540  | 0.736 | 0.923 | putative vacuolar ATP synthase subunit C                                                                                                |
| 124 | cgd7_2990 | 0.735 | 1.030 | hypothetical protein                                                                                                                    |
| 125 | cgd6_1480 | 0.735 | 1.038 | conserved hypothetical protein                                                                                                          |
| 126 | cgd5_2930 | 0.735 | 0.848 | hypothetical protein                                                                                                                    |
| 127 | cgd6_4900 | 0.735 | 0.863 | acylphosphatase, putative                                                                                                               |
| 128 | cgd7_980  | 0.734 | 0.803 | protein with MYND plus SET domains plus 5 Ank repeats                                                                                   |
| 129 | cgd1_500  | 0.734 | 1.065 | hypothetical protein                                                                                                                    |
| 130 | cgd6_1960 | 0.733 | 0.889 | membrane-associated protein with a family 1 glycosyltransferase domain and a ricin domain with 3 transmembraned domains near C-terminus |
| 131 | cgd2_4330 | 0.733 | 0.965 | hypothetical protein                                                                                                                    |
| 132 | cgd1_690  | 0.733 | 0.937 | hypothetical protein                                                                                                                    |

|     |           |       |       |                                                                                                                                                            |
|-----|-----------|-------|-------|------------------------------------------------------------------------------------------------------------------------------------------------------------|
| 133 | cgd8_4960 | 0.731 | 0.964 | hypothetical protein, signal peptide                                                                                                                       |
| 134 | cgd6_2400 | 0.730 | 0.913 | hypothetical protein                                                                                                                                       |
| 135 | cgd6_1930 | 0.730 | 0.898 | uncharacterized coiled-coil protein                                                                                                                        |
| 136 | cgd2_2170 | 0.729 | 0.970 | Ynr053p-like, Yjeq GTPase                                                                                                                                  |
| 137 | cgd3_610  | 0.728 | 0.822 | hypothetical protein with possible 4 transmembrane domains                                                                                                 |
| 138 | cgd2_500  | 0.728 | 1.048 | hypothetical protein                                                                                                                                       |
| 139 | cgd5_2000 | 0.728 | 0.901 | protein with RIO domain within N-terminal region                                                                                                           |
| 140 | cgd5_3640 | 0.728 | 0.880 | hypothetical protein                                                                                                                                       |
| 141 | cgd8_3150 | 0.727 | 0.818 | hypothetical conserved protein                                                                                                                             |
| 142 | cgd6_2300 | 0.726 | 1.073 | Cut4/Apc1p/TSG24 family protein; meiotic check point regulator and 26S proteasome regulatory complex; PC-rep repeats                                       |
| 143 | cgd7_760  | 0.725 | 0.888 | bruno-like protein with 2 RRM domains                                                                                                                      |
| 144 | cgd5_1840 | 0.719 | 0.829 | Vir superfamily protein                                                                                                                                    |
| 145 | cgd3_3340 | 0.717 | 0.870 | SECIS binding protein. pelota RNA binding domain containing protein                                                                                        |
| 146 | cgd1_640  | 0.715 | 0.944 | signal peptide, large protein                                                                                                                              |
| 147 | cgd8_630  | 0.710 | 0.929 | 26S proteasome regulatory complex, subunit PSMD5                                                                                                           |
| 148 | cgd3_1740 | 0.710 | 0.949 | hypothetical protein with signal peptide and 2 transmembrane domains                                                                                       |
| 149 | cgd8_1750 | 0.710 | 1.057 | signal peptide, possible ER retention motif                                                                                                                |
| 150 | cgd1_10   | 0.708 | 0.902 | predicted membrane associated protein with 11 transmembrane domains regions                                                                                |
| 151 | cgd5_3290 | 0.708 | 0.859 | transcription elongation factor TFIIIS                                                                                                                     |
| 152 | cgd3_3380 | 0.708 | 0.953 | Dbp9p, eIF4A-1-family RNA SFII helicase, DEXDc+HELICc                                                                                                      |
| 153 | cgd3_3950 | 0.705 | 0.862 | PUG domain fused to an UBA domain                                                                                                                          |
| 154 | cgd5_4130 | 0.704 | 1.052 | hypothetical protein having a signal peptide and transmembrane domain near C-terminus                                                                      |
| 155 | cgd1_3070 | 0.703 | 0.904 | multidomain protein with a conserved eukaryotic domain also present in the human DRIM protein at N-terminus and an archaeal-bacterial domain at C-terminus |
| 156 | cgd6_2540 | 0.703 | 0.898 | tRNA delta(2)-isopentenylpyrophosphate transferase, putative                                                                                               |
| 157 | cgd4_3430 | 0.703 | 0.889 | hypothetical protein with signal peptide and central coiled-coil region, within large locus of signal peptide containing proteins                          |
| 158 | cgd4_4420 | 0.701 | 0.877 | hypothetical protein                                                                                                                                       |
| 159 | cgd4_1370 | 0.700 | 0.893 | possible ABC transporter with 11 transmembrane domains, AAA domain                                                                                         |
| 160 | cgd2_4170 | 0.699 | 0.993 | conserved hypothetical protein                                                                                                                             |
| 161 | cgd5_2330 | 0.698 | 0.947 | actin-like                                                                                                                                                 |
| 162 | cgd3_950  | 0.697 | 1.110 | hypothetical conserved protein                                                                                                                             |
| 163 | cgd4_1480 | 0.697 | 0.944 | BMS1 like GTPase involved in ribosome biogenesis                                                                                                           |
| 164 | cgd6_4830 | 0.696 | 0.890 | Drs1p, eIF4a-1-family RNA SFII helicase                                                                                                                    |
| 165 | cgd2_800  | 0.685 | 0.963 | hypothetical protein with 10 transmembrane domains                                                                                                         |
| 166 | cgd8_5110 | 0.683 | 0.877 | hypothetical protein                                                                                                                                       |
| 167 | cgd6_3980 | 0.677 | 0.875 | hypothetical protein                                                                                                                                       |
| 168 | cgd2_2850 | 0.676 | 1.016 | hypothetical protein, possible signal peptide                                                                                                              |
| 169 | cgd7_1030 | 0.674 | 0.831 | hypothetical protein                                                                                                                                       |
| 170 | cgd8_3610 | 0.672 | 0.956 | predicted integral membrane protein, 7-pass transmembrane domain                                                                                           |
| 171 | cgd3_1570 | 0.665 | 0.833 | sporozoite antigen, putative                                                                                                                               |
| 172 | cgd8_3930 | 0.658 | 1.094 | LepA like TRAFAC class GTPase, 2 transmembrane domain near C                                                                                               |
| 173 | cgd6_3180 | 0.646 | 0.895 | 40S ribosomal protein S15                                                                                                                                  |
| 174 | cgd5_1510 | 0.639 | 1.060 | hypothetical protein                                                                                                                                       |
| 175 | cgd6_4090 | 0.637 | 1.011 | hypothetical low complexity protein                                                                                                                        |
| 176 | cgd3_3270 | 0.634 | 0.830 | possible nucleotide kinase related to CMP and AMP kinases                                                                                                  |
| 177 | cgd8_1790 | 0.625 | 0.889 | hypothetical protein                                                                                                                                       |
| 178 | cgd5_840  | 0.604 | 0.966 | PP2C like phosphatase                                                                                                                                      |
| 179 | cgd6_410  | 0.594 | 0.946 | Sgn1p-like RRM domain containing protein                                                                                                                   |
| 180 | cgd6_1100 | 0.591 | 1.040 | signal peptide-containing protein                                                                                                                          |
| 181 | cgd7_10   | 0.577 | 0.850 | hypothetical protein                                                                                                                                       |
| 182 | cgd1_3290 | 0.529 | 0.965 | carboxylesterase, putative                                                                                                                                 |
| 183 | cgd7_1290 | 0.516 | 1.091 | hypothetical protein containing a signal peptide                                                                                                           |
| 184 | cgd1_1690 | 0.329 | 1.117 | PHD finger containing protein                                                                                                                              |

**Cluster 9 0.5 h: Down-regulated (Ratio < 0.8) vs. 5 h: Down-regulated (Ratio < 0.8)**

| No. | GeneID    | Signal Ratio (0.5 h) | Signal Ratio (5 h) | Description                                                         |
|-----|-----------|----------------------|--------------------|---------------------------------------------------------------------|
| 1   | cgd7_1620 | 0.799                | 0.791              | nop15p/nopp34; nucleolar protein with 1 RRM domain                  |
| 2   | cgd2_570  | 0.795                | 0.776              | tRNA/rRNA methyltransferase-like protein, putative                  |
| 3   | cgd3_3660 | 0.787                | 0.779              | conserved hypothetical protein                                      |
| 4   | cgd8_2110 | 0.785                | 0.735              | conserved hypothetical protein                                      |
| 5   | cgd4_1070 | 0.782                | 0.793              | MYND finger domain protein                                          |
| 6   | cgd5_160  | 0.780                | 0.736              | hypothetical protein                                                |
| 7   | cgd6_1320 | 0.777                | 0.773              | hypothetical protein, possible transmembrane domain near N-terminus |
| 8   | cgd4_840  | 0.773                | 0.686              | possible 60S ribosomal protein L24                                  |

|    |           |       |       |                                                                         |
|----|-----------|-------|-------|-------------------------------------------------------------------------|
| 9  | cgd4_4210 | 0.768 | 0.794 | hypothetical protein with signal peptide plus transmembrane domain      |
| 10 | cgd6_230  | 0.759 | 0.693 | conserved hypothetical protein                                          |
| 11 | cgd1_530  | 0.750 | 0.788 | hypothetical protein                                                    |
| 12 | cgd8_2690 | 0.748 | 0.799 | hypothetical protein                                                    |
| 13 | cgd7_4200 | 0.734 | 0.729 | hypothetical protein                                                    |
| 14 | cgd5_3400 | 0.726 | 0.749 | mitochondrial processing peptidase beta subunit                         |
| 15 | cgd7_1050 | 0.717 | 0.763 | hypothetical protein                                                    |
| 16 | cgd4_1510 | 0.694 | 0.651 | conserved hypothetical protein                                          |
| 17 | cgd4_130  | 0.689 | 0.765 | RRM domain and KH domain protein (SPAC30D11.14-like KH)                 |
| 18 | cgd5_2990 | 0.687 | 0.770 | hypothetical protein with transmembrane domain within C-terminal region |
| 19 | cgd2_260  | 0.677 | 0.758 | hypothetical protein                                                    |
| 20 | cgd5_4540 | 0.676 | 0.736 | asparagine synthetase A (AsnA) like protein                             |
| 21 | cgd8_4360 | 0.672 | 0.746 | 40S ribosomal protein S15A                                              |
| 22 | cgd4_1270 | 0.665 | 0.782 | transcription factor TFIIIB, SANT domain                                |
| 23 | cgd5_4510 | 0.640 | 0.647 | hypothetical protein                                                    |
| 24 | cgd4_3930 | 0.631 | 0.767 | archo-eukaryotic exosomal RNase                                         |
| 25 | cgd6_4950 | 0.627 | 0.798 | hypothetical protein                                                    |
| 26 | cgd3_3790 | 0.619 | 0.790 | 60S ribosomal protein L19                                               |
| 27 | cgd6_4260 | 0.590 | 0.776 | Low complexity protein                                                  |
