# Supplementary material for: Transcriptome analysis reveals unique metabolic features in the Cryptosporidium parvum Oocysts associated with environmental survival and stresses
Source: PubMed Central journal article supplement (PMC3542205; doi:10.1186/1471-2164-13-647), 2012-11-21
Supplement: 1471-2164-13-647-S8.pdf [file 1471-2164-13-647-S8.pdf]

**Table S4.** List of primers used in this study

| Gene ID   |         | Sequence (5'-3')          |
|-----------|---------|---------------------------|
| cgd7_480  | forward | TGGTGGCCATGGCGATGGTATG    |
|           | reverse | AGCAGCGGCTGGTGCAAAGT      |
| cgd3_1570 | forward | TGACGGAGTTTCAGAGGCTGCT    |
|           | reverse | TTCCTCCGACCCAAACGCCG      |
| cgd3_3770 | forward | CGATGGCAAGAAGTTGAGATGCTGT |
|           | reverse | AGGCTTCTTCTCCTCAGCAGT     |
| cgd1_880  | forward | TGGGCAAGCTCAATCTGGTACTGGT |
|           | reverse | ACCACCAACGCAAGCATGGCA     |
| cgd5_3160 | forward | TGGTCAAGGCAGGTGTTGCAGG    |
|           | reverse | ACACCTGGCATTTCCTGGGCGAC   |
| cgd2_20   | forward | TGGTGATGCAGCAAAGAACCAAGT  |
|           | reverse | TGATTGGCTTGTCTTTGGACCTCT  |
| cgd2_2540 | forward | GGGAGCTAACTGGAAGTGAAGTGT  |
|           | reverse | GCCGTCTTCTAACAGCTTCAGGGT  |
| cgd3_3850 | forward | TGGCGGTAAGTCAGCAGTGAGT    |
|           | reverse | GTCCCTGCCTCACATTTTGCCCA   |
| cgd1_2770 | forward | AGGGGGCCCTTCCAATGCAAC     |
|           | reverse | AGCCCCATCTCTCCCCCTC       |
| cgd7_360  | forward | ACTCGCTCAGAACTCGAGGAGGA   |
|           | reverse | CTGCATGACCAGCAGCGCCT      |
| cgd4_3400 | forward | AGGCCAGACGGAGTAGCACAT     |
|           | reverse | TCGCCTCCATCTTCTGGCCTT     |
| cgd7_3430 | forward | ACGCTGTGCTTCTCTATCGCCA    |
|           | reverse | GCGCATTCAACCCATCACGCC     |
| cgd8_580  | forward | GGGCGTGTACTATTTTGGTCCTCC  |
|           | reverse | GGGCTGACAAATCCATGCCCA     |
| cgd3_3750 | forward | GCTCACTCAGGCTCAACTTGACA   |
|           | reverse | TCTTTGGGGCGGGCTTTGGT      |
| cgd5_1290 | forward | AGCTGCGGTAGCTGCGTCTTT     |
|           | reverse | GCATCCAATGTTCCCAATCAGGACG |
| cgd8_1970 | forward | CAACACCCTCTGGATCTACGGCA   |
|           | reverse | CCAAAGCAACCTGGACGCCAT     |
| cgd7_3170 | forward | TGCCACTTCTTCAGGCCATCAACT  |
|           | reverse | ACAAACAAAGTGCGATTTTCCGCA  |
| cgd4_780  | forward | TCCTCTTCAGGAGGGTTCCTGC    |
|           | reverse | TCTGACTTCCAGATTCGCTGTCCT  |
| cgd2_1450 | forward | CGGTGGTCCGACTCGTTCA       |
|           | reverse | TGCGATGGCTGATGCGAGTTGT    |
| cgd2_3180 | forward | GGCCCTTCAGGGGAGGGAAA      |
|           | reverse | CTGCATATGATGGGGCTTTGGCA   |
| cgd2_3200 | forward | TGGGATTGGGTTGGTGGTAGGT    |
|           | reverse | ATTCTGCACGAGGTTGGCG       |
| cgd7_910  | forward | TGCTAATGGCCCTCCAGGTGT     |
|           | reverse | AGCACCTCCGCTGTAGAAACA     |
| cgd1_3710 | forward | GGCCCTGTGGCAACACCTGA      |
|           | reverse | ATTGTGCCCAGGATGACTCAATGG  |
| cgd8_3510 | forward | GCCACTTCTTACAGTATAGG      |

|           |         |                            |
|-----------|---------|----------------------------|
|           | reverse | ACATTCTTGAACTTGACCAT       |
| cgd7_4710 | forward | AACCAAGTACTTCGTCCCCGA      |
|           | reverse | GCCGTTCTCCAATGATAGCCCCA    |
| cgd8_3250 | forward | AATGGTGTCTGAGGTGTT         |
|           | reverse | ATACGCCTGTGTAGTGAATA       |
| cgd6_2060 | forward | TCGTGCACAGGCCACATCCA       |
|           | reverse | ACCTCCGGAGCCAGATGCACA      |
| cgd4_2260 | forward | AGGAACTGCGTTGCGCTTGGT      |
|           | reverse | GGGGCAGACGCGCCAACAG        |
| cgd5_3490 | forward | CCTCGCAAGTGCTACTCCACG      |
|           | reverse | TGCAGCTCCACTTCCGTGCT       |
| cgd7_4110 | forward | TCCACTGGCCAAGTTGCAGCC      |
|           | reverse | ACAACCTCCATCGCTGTGCCCT     |
| cgd8_4330 | forward | GGTCGGCCCGGAAGGTAGTGT      |
|           | reverse | TGGTCAGGCTGGGCAACATCA      |
| cgd5_2060 | forward | ACTCGCCCTCGCCTTTGTCA       |
|           | reverse | TGTCGGCGACTGTTGGTGAAAGT    |
| cgd7_4470 | forward | ACACTGCAAAGCAGGACTTGACG    |
|           | reverse | AGGGAGGATTGAGCCTCTCGCA     |
| cgd3_2540 | forward | TGGCAAGGACCAAACAGACAGCG    |
|           | reverse | AGGAGCTGATTTCCCTTGCGCCC    |
| cgd5_1960 | forward | AGAAAGGCGCATGCAACGCT       |
|           | reverse | CCCCAGCCAAACGATCTTGCGA     |
| cgd5_3160 | forward | TGGTCAAGGCAGGTGTTGCAGG     |
|           | reverse | ACACCTGGCATTTCCTGGGCGAC    |
| cgd7_940  | forward | TGGTGGAAAGGAGACAAGGTGGCT   |
|           | reverse | TGCTTCCGCCTCTGTATGGAGACC   |
| cgd8_5000 | forward | TGGAGGACCATTCAGAACAGAGTGT  |
|           | reverse | ACAAACGGTTCCTCCTGTACCT     |
| cgd6_4900 | forward | TGGCGAGTTGGAGGGAGACGA      |
|           | reverse | TGTGGAACCGGACTACCTTCCC     |
| cgd5_2000 | forward | ACCAGGCTAGAGCTAGCGATGAA    |
|           | reverse | AGCATCGTCCGCCCATCAAGC      |
| cgd5_3290 | forward | GCTCTTGAGCAAGGCTTGGTGG     |
|           | reverse | TCATCAATTCAAACCTCCTTGCGC   |
| cgd3_1570 | forward | TGACGGAGTTTCAGAGGCTGCT     |
|           | reverse | TTCCTCCGACCCAAACGCGC       |
| cgd6_4950 | forward | AGCATCAGCAACATTTGCAAAGCCA  |
|           | reverse | CCACTTCCCTTGCTGTTGTTGAAGC  |
| cgd3_1400 | forward | TGTTTACCTCATCAGACTGGGAGAC  |
|           | reverse | ATGGAAGATTTTGACTGGCTGTTT   |
| cgd7_480  | forward | AAGCAAGTCTTATCACCCAG       |
|           | reverse | GCAAAGTAGGCAGTTCCTGTC      |
| cgd7_470  | forward | GTATTTACAAAACCTCTGATGTCGTC |
|           | reverse | GCATTAGGGCAGTATTTACCG      |
| cgd6_3800 | forward | AGCAGCATCTCTTGTCTCAGC      |
|           | reverse | TGATCCATCTATGGCAATGGT      |
| cgd7_7    | forward | TTGTTCCCTTACTCCTTCAGCAC    |
|           | reverse | TCCTTCCATGTCTGGACCTG       |

---
